# Supplementary material for: Establishment of a novel ferroptosis-related lncRNA pair prognostic model in colon adenocarcinoma
Source: PubMed Central journal article supplement (PMC8544324; doi:10.18632/aging.203599), 2021-10-05
Supplement: aging-13-203599-s001.pdf [file aging-13-203599-s001.pdf]

SUPPLEMENTARY FIGURES

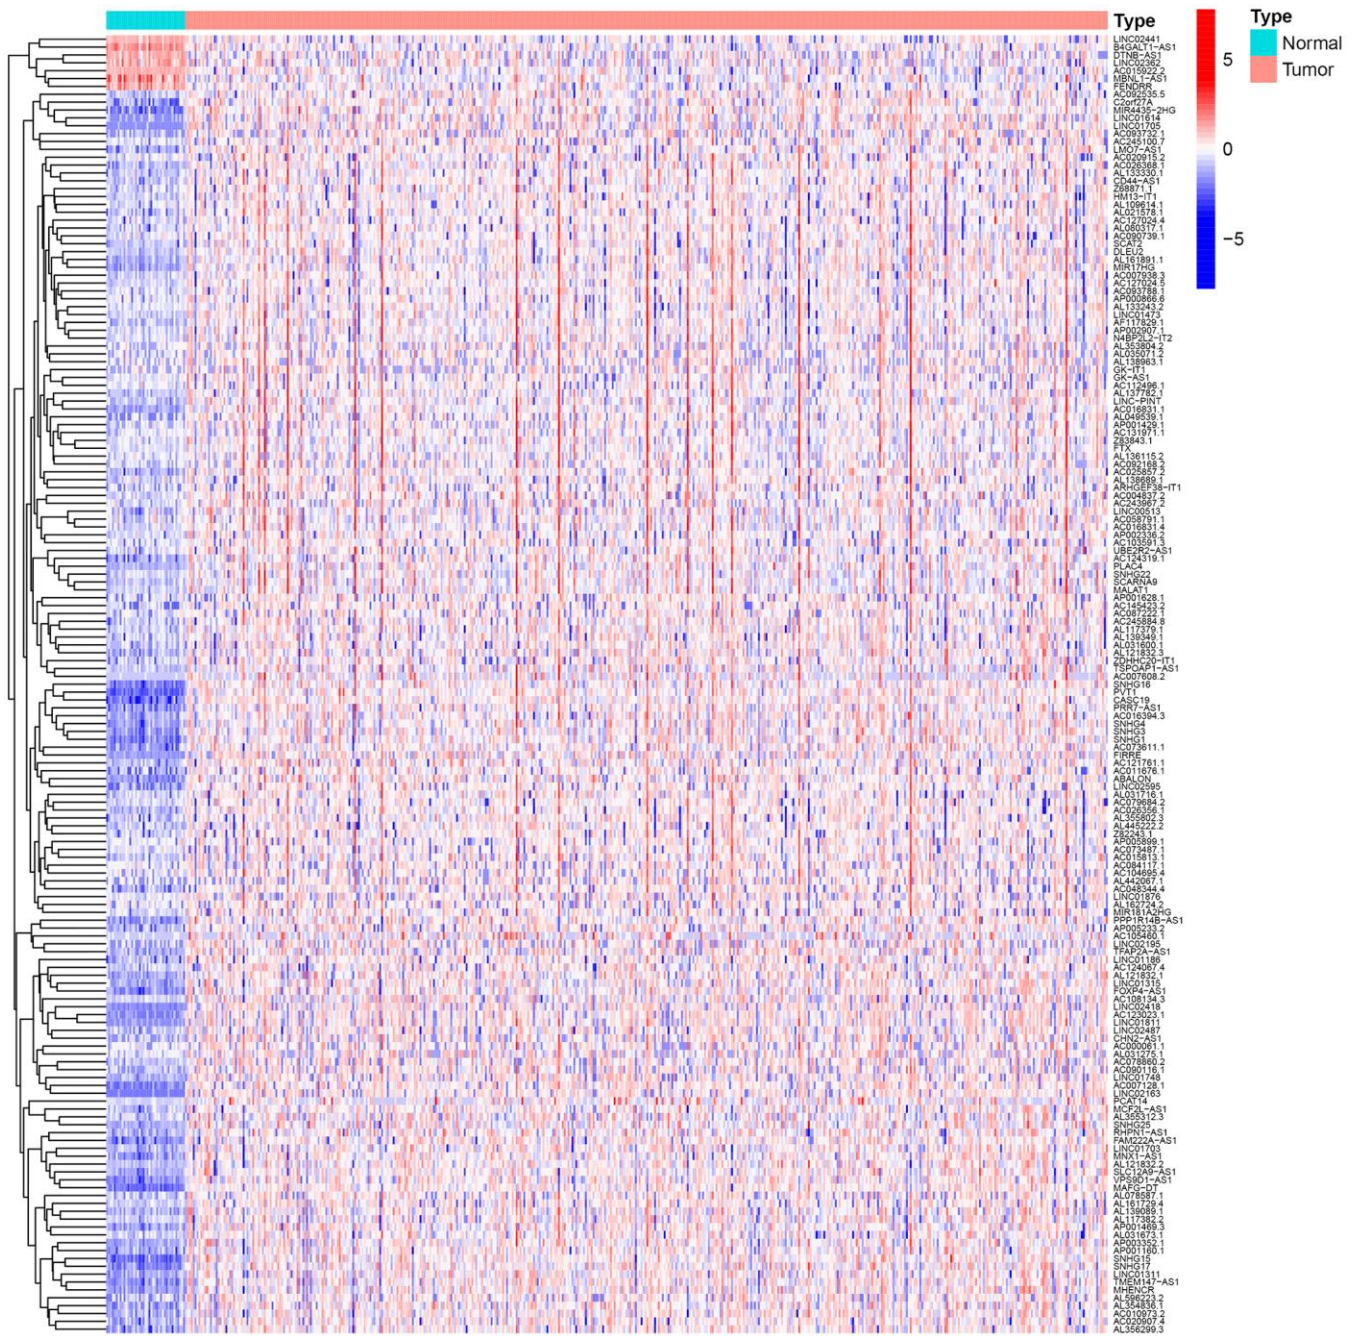

Supplementary Figure 1. Differentially expressed lncRNAs in COAD visualized by a heatmap.

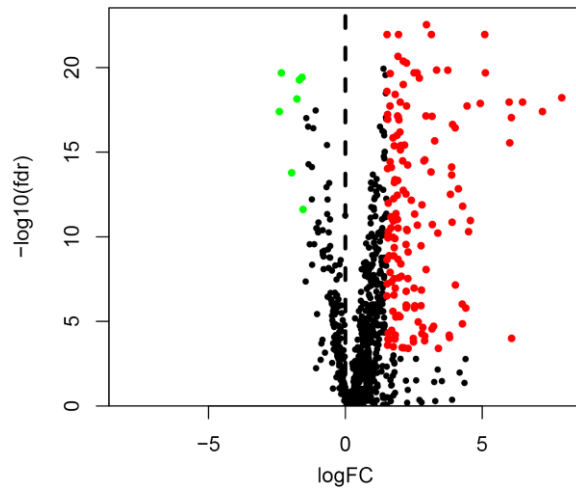

**Supplementary Figure 2.** Differentially expressed lncRNAs in COAD represented by a volcano plot.

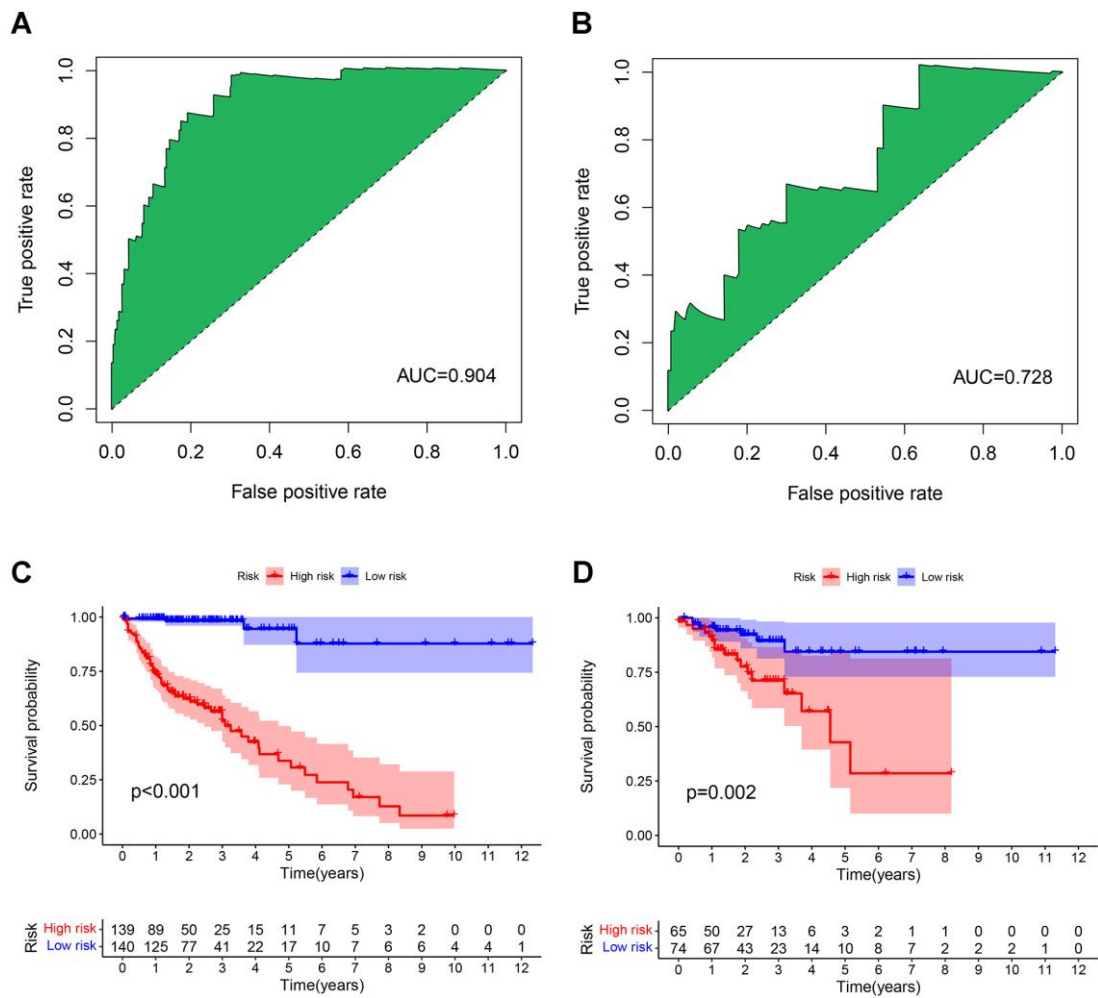

**Supplementary Figure 3.** The ROC curves for predicting the 1-year OS in (A) training cohort and (B) validation cohort; survival curves of high-risk and low-risk group patients in (C) training cohort and (D) validation cohort.
