# Supplementary material for: Establishment of a novel ferroptosis-related lncRNA pair prognostic model in colon adenocarcinoma
Source: Aging (Albany NY). 2021 Oct 5;13(19):23072–95. doi: 10.18632/aging.203599 (PMC8544324; doi:10.18632/aging.203599)
Supplement: Supplementary Table 2 [file aging-13-203599-s003.xlsx]

## Sheet: Sheet1
Supplementary Table 2. The list of 896 ferroptosis-related lncRNAs.
ID	TCGA-AA-3655-11A-01R-1723-07	TCGA-AA-3489-11A-01R-1839-07	TCGA-A6-2685-11A-01R-A32Z-07	TCGA-A6-2683-11A-01R-A32Z-07	TCGA-AA-3531-11A-01R-A32Z-07	TCGA-AA-3660-11A-01R-1723-07	TCGA-AA-3663-11A-01R-1723-07	TCGA-A6-2675-11A-01R-1723-07	TCGA-AA-3525-11A-01R-A32Z-07	TCGA-AA-3496-11A-01R-1839-07	TCGA-AZ-6598-11A-01R-1774-07	TCGA-A6-2678-11A-01R-A32Z-07	TCGA-A6-2679-11A-01R-A32Z-07	TCGA-AA-3527-11A-01R-A32Z-07	TCGA-AZ-6600-11A-01R-1774-07	TCGA-AA-3517-11A-01R-A32Z-07	TCGA-A6-5659-11A-01R-1653-07	TCGA-AZ-6605-11A-01R-1839-07	TCGA-A6-2680-11A-01R-A32Z-07	TCGA-AA-3516-11A-01R-A32Z-07	TCGA-A6-5667-11A-01R-1723-07	TCGA-AZ-6603-11A-02R-1839-07	TCGA-AA-3713-11A-01R-1723-07	TCGA-A6-5662-11A-01R-1653-07	TCGA-AA-3511-11A-01R-1839-07	TCGA-AA-3662-11A-01R-1723-07	TCGA-AA-3520-11A-01R-A32Z-07	TCGA-A6-2682-11A-01R-A32Z-07	TCGA-AA-3522-11A-01R-A32Z-07	TCGA-AZ-6601-11A-01R-1774-07	TCGA-A6-5665-11A-01R-1653-07	TCGA-AA-3514-11A-01R-A32Z-07	TCGA-AA-3534-11A-01R-A32Z-07	TCGA-A6-2684-11A-01R-A32Z-07	TCGA-A6-2686-11A-01R-A32Z-07	TCGA-F4-6704-11A-01R-1839-07	TCGA-AA-3518-11A-01R-1672-07	TCGA-A6-2671-11A-01R-A32Z-07	TCGA-AZ-6599-11A-01R-1774-07	TCGA-AA-3712-11A-01R-1723-07	TCGA-AA-3697-11A-01R-1723-07	TCGA-CK-4950-01A-01R-1723-07	TCGA-G4-6294-01A-11R-1774-07	TCGA-A6-3807-01A-01R-1022-07	TCGA-AA-3846-01A-01R-1022-07	TCGA-F4-6703-01A-11R-1839-07	TCGA-AZ-4313-01A-01R-1410-07	TCGA-F4-6461-01A-11R-1774-07	TCGA-AA-3811-01A-01R-1022-07
AC027644.3	1.76282	1.59433	0.889692	1.00828	1.14529	2.56751	1.12154	0.976691	0.535152	1.91855	1.37083	1.09372	0.803422	0.468766	1.17399	0.684664	1.31318	1.10547	0.661618	0.948164	1.38762	1.26632	1.18024	1.19387	1.34503	1.2024	0.456602	0.868274	1.00355	0.879494	1.5314	0.666055	1.30845	1.37667	1.13072	0.745616	1.89839	1.60159	0.778097	0.945717	0.643168	0.299877	0.49744	0.942121	0.613045	0.511259	0.334137	0.843295	0.6304
AL392172.1	3.36091	5.94976	1.61451	2.08599	2.5813	3.04283	1.3879	2.52239	2.14492	2.62409	1.66067	1.5631	1.37547	1.35694	1.95275	1.94227	1.40648	1.152	7.85707	2.69331	1.84771	2.4633	4.42298	2.17722	1.86219	2.72289	1.69181	1.6756	1.22468	1.54141	1.59587	1.50965	1.48384	1.34024	1.48046	1.6997	1.47474	1.42357	1.2347	1.73539	1.83435	1.40625	2.5919	0.674974	3.78748	1.55394	3.59809	2.42825	2.5339
LINC01355	0.295137	0.189575	0.254252	0.34286	0.226185	0.406917	0.42075	0.382339	0.534902	0.374187	0.725822	0.335709	0.285749	0.306421	0.526663	0.313933	0.634467	0.520285	0.307439	0.0782346	0.280003	0.552802	0.074311	0.392625	0.467895	0.430578	0.329614	0.450765	0.41071	1.19026	0.383008	0.241922	0.645741	0.218694	0.305539	0.403687	0.250737	0.195997	0.738207	0.757257	0.166245	0.281714	2.15718	1.19286	1.63977	0.374883	0.125352	0.758367	0.737131
AL139287.1	2.3125	1.55448	2.70047	2.26801	2.15231	2.83318	4.99004	4.22811	2.49489	1.90332	4.35184	3.42703	1.93224	1.6535	4.23519	2.48823	3.57931	3.56261	2.98349	1.67716	4.56089	4.1419	1.24457	2.46108	4.54722	3.87052	1.94003	3.29473	2.74381	6.05713	2.33259	1.53779	2.61002	2.40477	2.09185	4.30371	1.74325	1.08758	4.54223	6.11137	2.78429	1.57354	6.62592	4.58826	5.43414	2.37719	1.28576	5.44393	5.06816
AL138689.1	0.0668133	0.143719	0.127906	0.0741824	0.0666267	0.0419779	0.116897	0.849805	0.102975	0.24996	0.657248	0.495073	0.255207	0.173721	1.76957	0.211443	0.669152	0.0614517	0.0919464	0.204028	0.25712	0.140787	0.227105	0.106659	0.224306	0.0385614	0.169213	0.160888	0.110104	0.56668	1.41882	0.111076	0.256712	0.0302083	0.217577	0.569909	0.115123	0.130927	0.442365	0.685713	0.0564521	0.272779	1.56341	0.785571	1.67958	0.0473672	0.278614	1.18428	0.375462
AC016727.1	1.42102	0.953687	0.82699	1.00134	1.16387	1.39992	1.35251	0.939851	0.911093	0.81658	0.855737	1.02856	0.998727	1.18233	0.935296	1.08649	1.26275	0.669175	1.31414	1.60557	1.01715	1.34145	1.50701	1.63331	1.10134	1.03666	0.834945	1.29574	1.42378	1.0436	1.0622	0.859916	1.09197	1.79896	0.839126	0.863903	1.15569	1.0693	1.34478	1.40007	0.749205	0.603365	1.17262	0.6349	1.01886	0.435208	0.379244	0.680072	0.817716
AC004837.2	0.0915827	0.0656665	0.0701295	0.0451927	0.0405898	0.11508	0.14243	0.291212	0.0313669	0.0456836	0.235019	0.166676	0.174909	0.0396873	0.516084	0.0579659	0.277946	0.0842334	0.0840221	0.0466111	0.11748	0.0321633	0.0345887	0.064978	0.117128	0.0704761	0.0773149	0.147022	0.040246	0.24369	0.226894	0.0761271	0.146617	0.110419	0.110459	0.260396	0.210403	0.0478574	0.242544	0.250646	0.0515868	0.0830899	0.787225	0.897335	0.467122	0.151497	0.169735	0.236735	0.205862
AL136320.1	0	0	0.0397401	0	0	0	0.121066	0	0.0533237	0	0	0	0	0	0	0.0328474	0	0	0	0	0	0.0546776	0	0	0	0	0	0.0416562	0	0	0	0	0	0	0	0.0402431	0	0	0	0.0532623	0.0438488	0	0	0.152547	0	0	0	0	0.233311
AL031775.2	0.771405	0.770406	1.47676	1.22355	1.17219	1.93865	1.41393	0.642425	1.35877	0.742104	1.69678	1.16038	1.10495	1.18195	1.1799	1.08112	1.50503	0.810859	1.06158	1.30402	1.64335	0.522474	0.936457	1.29009	1.00419	1.71727	1.32571	1.06146	1.27123	1.04463	1.75513	0.732825	1.11147	1.04633	0.837359	1.23909	1.32917	1.20932	1.16741	1.30065	0.605222	0.674875	1.21039	1.13374	1.68625	0.546886	0	0.976666	0.619281
AC112220.2	1.28982	0.81714	2.24596	1.80481	2.31402	1.95378	1.25715	2.13494	1.08927	0.608138	1.40559	2.60466	2.10905	1.33228	3.32552	2.01297	2.76696	0.455025	1.93306	3.615	3.53576	0.930774	1.54148	1.8616	2.22018	1.42766	2.30454	3.37537	2.34101	1.32228	2.49512	1.99743	1.78205	2.0291	2.2376	1.00018	2.55732	3.04689	1.49739	3.01019	1.8213	1.19025	2.36253	1.03872	2.20151	1.16494	0.736794	1.52677	0.99291
AC078883.1	0.455979	0.441377	0.7123	0.634527	0.388016	0.687566	0.78715	0.599297	1.4524	0.68236	1.16233	1.15943	1.00148	0.81213	1.88089	0.842729	1.92634	0.125817	0.420428	0.494312	0.868608	0.634143	0.805957	0.572627	0.874753	0.884249	0.750637	1.55185	0.925755	1.31037	1.38467	0.773217	1.05995	0.783416	0.593958	0.806177	0.691396	0.700534	1.03049	2.33053	0.631839	1.04251	1.3936	2.0909	3.34907	0.517225	0.304232	1.25276	2.23442
MCF2L-AS1	3.79241	1.44951	4.48806	2.85352	1.58357	4.88359	2.70527	2.55797	1.99664	1.45398	2.01076	2.32239	1.79577	1.6706	1.16568	2.06311	1.54096	0.144135	1.16457	0.66997	4.34215	1.12273	1.56252	1.80122	4.50952	5.57147	2.26227	2.79249	2.08666	2.03282	1.79703	1.17238	3.22134	5.78166	2.24545	4.1317	2.07917	3.12004	2.15815	3.02368	2.1715	1.10899	9.66885	17.5043	10.6879	0.3333	18.6463	3.12495	4.64983
AC008669.1	1.1373	1.39951	0.713971	0.508128	0.48362	0.952733	0.848516	1.53125	0.463216	1.8246	0.815085	0.94301	0.459853	0.759252	0.866064	0.797657	0.951526	1.17797	1.36771	0.524076	0.778739	0.76644	0.766192	2.12633	0.864857	1.32461	0.512495	0.641483	0.709155	0.981473	0.48955	0.579144	0.718452	0.592959	0.711804	1.15205	1.07691	0.915554	0.723599	0.536292	0.649277	0.313733	1.61465	0.240937	0.940678	0.305081	0.14242	0.624289	0.391529
AC106782.5	0.435852	0.0937544	0.700884	0.483924	0.753368	0.711985	0.660896	0.415774	0.582186	0.195672	1.52859	0.747902	0.749173	0.56663	0.933319	0.772426	0.634934	0.200438	1.2296	0.665483	1.09025	0.551047	0.197534	0.788556	0.919755	1.00621	0.800292	0.59474	0.689526	0.565378	0.925556	0.434757	1.25598	0.748835	0.599282	0.709756	1.0514	0.478294	0.846484	1.20777	0.441914	0.622809	1.33209	0.896809	1.5244	0.339896	0.121168	0.531134	1.17567
AC002401.3	0.96363	0.327288	1.16511	0.863438	0.674343	1.14714	1.2423	0.698836	1.56335	0.607176	0.954438	1.10764	0.871765	0.527481	0.571602	0.481513	0.92354	0.0932948	0.942241	0.851819	1.17107	0.534349	0.51718	1.45735	1.11891	1.46358	0.995473	0.854899	1.40413	0.607287	0.753908	0.463741	1.55894	1.32999	1.06437	0.904554	1.17975	0.636069	0.850681	1.4054	0.514227	0.517659	1.69538	0.29816	0.443462	0.071912	0.281991	1.51702	0
AP000866.6	0.054033	0.116228	0.165503	0.0999875	0.125725	0.135793	0.378147	0.143177	0	0.202147	0.323538	0.252868	0.103195	0	0.456728	0.119698	0.295175	0.124243	0.0371793	0	0.155953	0.170785	0.0612211	0.0287524	0.310972	0.0935557	0.0684227	0.195169	0.0890429	0.161747	0.200799	0.0449143	0.181656	0.0977198	0.0391019	0.251397	0.116377	0.0211766	0.214649	0.110909	0.0913074	0.16545	0.541866	0.714717	1.41736	0.0766132	0	0.419015	0.607286
AC005046.2	0.28564	0.307214	0.656188	0.713575	0.37979	0.403794	0.874579	0.870427	0.586987	0.961767	2.19903	0.696229	0.647818	0.603438	1.24746	0.406782	1.56041	1.74051	0.368521	0.29984	0.996186	1.12854	0.121365	0.379991	0.684967	0.37093	0.203462	0.51587	0.517788	1.71012	0.98568	0.534229	0.685935	0.387439	0.671801	0.969053	0.430652	0.503767	1.48144	1.649	0.211176	0.437319	1.02304	0.419809	0.234148	0.708764	0.297783	0.63288	0.642071
AC009318.2	0.582743	0.294945	0.603732	0.888061	0.638088	0.603037	1.03957	0.762997	0.880537	0.769463	1.34882	1.14969	0.589211	0.869006	0.502237	0.802767	2.18472	0.725149	0.613258	0.628069	0.791504	0.794546	0.582588	0.912038	0.62473	0.751799	0.781343	0.96302	0.632684	1.33398	1.23749	0.683857	1.15244	0.681937	0.520938	0.877187	0.885969	0.617993	1.14992	1.54796	0.666152	0.76973	1.44054	0.503803	1.64851	0.972082	0.476483	1.25318	0.539374
UBE2R2-AS1	0.0344909	0.074192	0.18488	0.12765	0.229298	0.0866808	0.241383	0.109673	0.141757	0.0516147	0.295035	0.0538044	0.098809	0.15694	0.660832	0.0218306	0.188419	0	0.0237327	0.078994	0.232283	0.218034	0.117238	0.110121	0.363922	0.079626	0.0655145	0.193795	0.113678	0.275328	0.549326	0.114681	0.132522	0.187133	0.199679	0.294204	0.0594298	0.108142	0.456723	0.353985	0.145711	0.234694	0.329419	1.11522	0.82935	0.220071	0	0.22926	0.465179
SMIM25	0.282246	1.64512	0.257962	0.323485	0.236062	0.663563	1.24252	0.386012	0.458396	0.91287	0.903426	0.440292	1.09549	0.230813	0.184704	0.224745	0.281847	0.334963	0.131561	0.166819	0.289063	2.84899	1.03159	0.445726	0.200865	0.567518	0.253647	0.5408	0.354094	0.890324	0.386687	1.12009	0.349824	0.279923	0.276728	1.32025	0.345134	0.356832	2.33088	0.392459	2.03089	1.54263	1.42611	1.98043	1.11454	5.97066	0.430293	2.06772	1.10516
AC005519.1	0.212219	0.245805	0.187508	0.0725001	0.141084	0.184617	0.456985	0.0865139	0.117414	0.342009	0.460811	0.445648	0.140299	0.148559	0.202381	0.0929915	0.267536	0.285276	0.0673959	0.0373878	0.486873	0.395582	0.166466	0.138987	0.313171	0.358026	0.15504	0.222756	0.258257	0.325782	0.259995	0.122126	0.297932	0.162378	0.177203	0.265834	0.168768	0.115162	0.302633	0.569638	0.206895	0.0888642	0.795159	0.287909	1.28465	0.335624	0	0.632966	0.660506
BX322234.1	0.569276	0.440837	0.139496	0.269681	0.0756916	0.314749	0.345284	0.627526	0.140383	0.306686	0.428523	0.177609	0.0869788	0.177621	0.333629	0.259427	0.124395	0.50265	0.125347	0.104304	0.460062	0.959647	0.309604	0.242341	0.633419	0.289132	0.0865059	0.365555	0.510343	0.454432	0.2176	0.0378564	0.437458	0.0823638	0.346051	0.459099	0.176561	0.214186	0.30153	0.350553	0.288597	0.185935	0.456715	0.133868	0.398211	1.08161	0.126608	0.580207	0.563041
AC107027.3	0.430506	0.635791	0.728206	0.661098	0.337463	0.581333	0.749471	0.885366	0.448945	0.682702	0.769487	0.651524	0.546091	0.538796	1.05005	0.691374	0.549922	0.975123	0.614555	0.294323	0.531638	0.683745	0.436815	0.745376	0.770415	0.704608	0.655	0.706584	0.76239	0.910435	0.477569	0.566156	0.635719	0.482254	0.585886	0.951674	0.725178	0.513727	0.73173	0.791344	0.656911	0.730159	1.43603	0.358856	0.842745	0.56486	0.357259	0.818605	0.837715
AC008115.3	1.01619	0.874358	0.342387	0.872532	0.648549	0.408616	1.13789	0.344669	1.00237	0.547454	0.625861	1.23647	0.815129	0.449175	0.32068	0.643186	0.962231	0.598175	0.279691	0.341348	0.703919	0.428258	0.87505	0.302816	1.0917	0.938397	0.746356	0.652538	0.723437	1.41958	0.604225	0.304092	1.17134	0.624855	0.588308	0.283681	0.630345	0.382336	1.11239	2.33617	0.652541	0.442541	1.82464	0.836368	3.90958	0.979784	0.452008	0.585399	3.01519
AL161891.1	0.0625762	0.155313	0.213787	0.103326	0.102402	0.0604859	0.117906	0.122448	0.163215	0.0936435	0.168818	0.105125	0.114915	0.156446	0.195301	0.106634	0.122714	0.0531273	0.0861154	0.0698212	0.194504	0.126787	0.109078	0.143439	0.355522	0.138907	0.0731456	0.146821	0.142784	0.158502	0.16355	0.196059	0.175701	0.0696433	0.139336	0.302344	0.0912342	0.0792342	0.182722	0.177847	0.174884	0.196523	1.37001	0.396174	0.799686	0.153565	0.0936727	0.191973	1.03873
AC005253.1	0.501851	0.455793	0.307434	0.321939	0.259493	0.462449	0.533331	0.378257	0.527108	0.200268	0.696392	1.1395	0.394034	0.318966	0.389638	0.296463	0.629539	0.410292	0.345316	0.221362	0.53647	0.481742	0.265353	0.403539	0.748808	0.566415	0.324811	0.44758	0.382266	0.701066	0.355236	0.278105	0.696304	0.413466	0.306679	0.389157	0.211375	0.209798	0.600549	1.21324	0.244992	0.485667	0.852109	1.08178	0.950751	0.458569	0.124014	0.593028	2.20602
AC068580.3	0.420841	0.345425	0.771726	0.770564	1.14856	0.626231	0.607131	0.340414	0.91034	0.232023	0.53998	1.32163	0.772018	1.02224	0.249633	0.848163	0.746165	0.162977	1.08209	0.828568	1.1081	0.396718	0.376442	0.424308	0.690491	0.728667	0.904555	1.08451	1.07313	0.906158	0.6585	0.920577	1.3723	1.01146	0.90563	0.36069	0.591555	0.911488	0.43995	1.5117	0.748585	0.625473	0.507713	0.944049	0.895728	1.79798	0.523398	0.613446	1.86706
AC145207.5	0.682283	0.465346	1.87321	1.30567	1.2114	0.585499	1.05786	0.890732	1.28239	0.547862	1.94304	1.09029	1.28717	1.11416	2.73823	1.40085	1.62119	0.313766	0.853058	0.800366	1.65705	1.10456	0.631637	1.31941	1.07744	0.874	1.4909	1.53609	1.11339	1.48614	1.07781	1.36252	1.29476	0.948013	1.51736	1.44527	0.939055	1.43483	1.48374	1.03327	1.08968	1.51734	2.01055	1.54083	1.43687	0.825835	2.05868	1.02316	3.98377
AC069234.5	1.07287	0.57695	2.38249	0.794132	0.463611	0.606661	0.56313	1.13716	1.10237	0.321103	0.64241	1.25522	1.02451	0.801999	0.665037	0.441387	1.95364	0.789418	0.479845	0.122858	1.13541	0.508659	0.911695	0.51381	0.566003	0.557286	0.815151	0.430581	0.636486	0.802903	0.683488	0.802628	0.927496	0.58209	1.04814	0.873545	0.785659	0.840956	1.56274	1.43143	0.589218	1.16805	3.07405	0.630723	1.05536	0.570456	0	0.356565	0.723487
AC090198.1	0.862303	0.285364	1.18275	1.03807	0.78115	1.13118	1.0279	1.0345	0.67181	0.609755	1.04563	1.26385	0.986313	1.04096	1.26019	1.10956	1.50119	0.810536	1.00411	0.810222	1.27632	0.848605	0.493876	1.12949	1.018	1.26881	1.21194	1.24739	1.01814	1.41829	1.04637	0.677396	1.22878	0.779746	1.00117	0.867063	0.808207	0.891307	1.17949	1.24482	0.79263	0.644785	1.07698	1.28126	1.8021	0.60461	0.263431	0.598364	1.29931
AL138963.1	0.143972	0	0.110247	0.159851	0.0478566	0	0	0.152599	0.221895	0	0.246307	0.22459	0	0.0467926	0.243392	0	0.131083	0.0662092	0.19813	0	0.0692566	0	0	0.0766112	0.138098	0	0.0911567	0	0.332159	0.359148	0.076433	0	0	0.065094	0.156281	0	0.0620178	0.0564255	0.127097	0.22164	0	0.0489828	0.893787	1.26958	1.1015	0	0	0.159496	0.485437
AC020558.2	0.11228	0.241521	0.429893	0.0623319	0.0933054	0.141088	0.654821	0.446281	0.317259	0.0840118	0.504232	0.459774	0.428876	0.0729848	0.664352	0.106599	0.153342	0.361444	0.154516	0.107147	0.75616	0.354888	0.159021	0.238988	0.296173	0.615624	0.142181	0.247841	0.333054	0.364117	0.238433	0.0699986	0.37748	0.228443	0.18282	0.413567	0.241831	0.330036	0.693836	1.23877	0.379472	0.267403	1.20642	0.495058	1.53399	0.238802	0.234106	0.55974	0.883352
AC007637.1	1.10352	0.975869	1.03281	1.50658	0.668415	0.67792	0.800896	1.24763	1.10866	1.3945	1.11176	1.47279	0.88986	1.17959	0.994964	0.884713	1.20568	1.44351	0.877431	0.992228	1.86384	1.24016	0.50013	0.887343	1.71712	1.41533	1.00924	1.10229	1.32551	1.46817	0.963392	0.754216	1.64888	0.997869	0.585625	1.4262	1.18311	0.922649	1.60198	1.3339	0.310796	0.51728	0.515269	0.432496	0.643264	0.452018	0.0681737	0.163001	0.220491
AL121839.2	0.224988	0.11062	0.475015	0.452025	0.472225	0.411955	0.404889	0.306605	0.419416	0.153915	0.538873	0.411139	0.448111	0.549475	1.6156	0.490274	0.801829	0.162591	0.27866	0.220837	0.705035	0.406361	0.145668	0.667024	0.403872	0.448918	0.470095	0.727529	0.364411	0.907621	0.402696	0.256483	0.549548	0.21798	0.411693	0.548321	0.440279	0.307362	0.916477	0.887348	0.366617	0.356489	0.589395	0.085029	1.37005	0.259765	0.187642	1.21775	0.469612
SNHG3	4.35614	3.31718	4.71515	2.66275	1.70565	3.35425	3.5147	2.91033	4.12815	3.27575	6.84543	2.95489	2.75755	2.57256	4.70034	2.06614	3.30016	1.44096	1.81797	1.28356	3.69205	4.37675	8.40543	3.86335	3.27257	3.40891	2.1187	2.95323	2.5656	6.88496	2.94439	2.86321	3.38731	2.21141	2.46897	4.25417	1.74949	1.98966	5.93698	5.18226	6.07898	7.67406	15.1144	17.2653	15.6676	4.90718	11.0934	6.47679	9.89002
LMO7-AS1	0	0.040474	0.0288166	0.0835646	0.150107	0	0	0.0797737	0.0773328	0.168945	0.128761	0.117408	0.215614	0.122308	0.254474	0.0238185	0	0.138448	0.0258938	0.0574583	0.0724099	0	0.085276	0.120149	0.0721929	0.0434385	0.0714804	0	0.0744177	0.11265	0.11987	0.031281	0.072295	0.0340289	0.0544656	0.0583626	0	0.0294973	0.265767	0.154488	0.0317959	0.153639	0.287533	2.98663	0.658089	0.693653	0.627704	0.208447	0.16918
AC090579.1	1.41687	1.19053	1.83088	1.27817	1.41291	0.945836	1.65264	0.844747	1.18285	1.19267	0.719616	1.65769	1.22616	1.20881	0.798428	1.00888	1.29002	0.325792	0.396063	0.878861	1.53354	0.419845	1.75586	0.706829	1.52894	1.6866	1.26154	1.49268	2.1306	1.36961	0.705186	1.21456	0.978205	1.52144	1.57005	0.274675	1.60213	1.1106	0.899007	0.772515	0.56116	0.36154	0.888058	1.43164	0.871087	0.251121	0.123091	0.73577	0.0995274
LINC01614	0.0688754	0.0370388	0	0	0	0	0	0.0365014	0	0	0.029458	0	0	0	0.0388125	0	0	0	0.0473921	0	0	0	0.117057	0.0366504	0.0330327	0	0	0	0	0.0343629	0	0	0	0	0.0249214	0	0.029669	0	0.0304012	0	0.0581944	0.164032	0.032891	0.404908	0.526954	6.51869	0.382951	0.915624	0.541871
AP001330.4	0.760143	0.759159	0.74839	0.964551	0.974599	0.750495	1.13996	0.920794	0.502099	0.975028	0.928894	0.296448	0.725881	0.388231	1.16267	0.446756	1.08757	1.89768	0.523043	0.746119	0.835797	1.25852	0.738229	1.32905	0.937454	0.376044	0.825068	1.00238	0.858972	0.866849	1.26831	0.541595	0.417235	0.196391	0.392921	1.05259	0.420997	0.340475	0.958637	1.00304	0.550511	0.369457	0.570431	0.319198	1.18688	1.42424	0	0.601505	0.122048
AC067852.2	2.61459	1.86779	2.46756	1.90674	2.14869	2.38829	2.50951	2.27019	2.22055	1.96354	1.89815	2.64134	1.88868	2.22634	1.93549	2.69908	1.70414	1.88122	1.82561	1.87083	1.86571	2.21594	1.7053	1.86874	2.55419	2.53915	1.81427	2.29226	2.24496	1.75211	1.80293	1.85256	3.09531	3.14072	2.10154	1.7731	2.10292	2.29142	2.55512	2.34672	2.29064	2.48154	1.7047	1.87172	1.18103	2.1614	1.90433	2.73618	1.3229
AC004067.1	0.382554	0.480022	0.366176	0.448344	0.339098	0.72106	0.371845	0.337899	0.196536	0.333947	0.763551	0.42271	0.487081	0.373004	0.395222	0.464086	0.638562	0.351855	0.438715	0.194701	0.306708	0.302289	0.108361	0.30535	0.886787	0.551979	0.524802	0.63972	0.630424	1.01793	0.236942	0.50349	0.826796	0.547719	0.669033	0.271928	0.549301	0.199907	0.816142	0.883394	0.296293	0.325386	1.00477	0.468537	0.696869	0.474619	0	0.706339	0.429958
AC091588.1	0.124321	0.133711	0.237998	0.276066	0.206623	0.156219	0.290018	0.0658855	0.127739	0.186043	0.159516	0.533323	0	0.282841	0.420342	0.118031	0.113192	0	0.213859	0.0949102	0.0598037	0.0654912	0	0.264618	0.417372	0.717521	0.314859	0.299368	0.327797	0.372153	0.264003	0.0516703	0.238835	0.168628	0.0899669	0.289212	0.107106	0.0974479	0.493872	0.255184	0.0525209	0.126891	0.178106	0	0.27176	0.0881372	0	0.344316	0.978085
LINC02446	2.95656	0.77423	1.2009	0.380598	0.10255	0.775334	0.149937	0.136249	5.09831	0.115419	0.307883	0.721896	9.40283	0.534773	0.0869256	0.699709	0.327708	0.0709385	0.371493	3.55252	0.049469	1.05638	1.25256	1.58695	0.345245	0.563849	0.390672	0.123817	0.457566	0.97483	0.600545	1.11127	0.271647	0.139487	0.204654	0.179425	0.376537	0.241823	0	0.448557	0.0868894	0.279902	0.0245546	0.151141	0.280996	2.55172	0	0.142407	0.577901
MIR222HG	0.136217	0.232686	0.589038	0.237241	0.271674	0.251717	0.39254	0.356704	0.197594	0.443664	0.82935	0.781226	0.397885	0.145839	2.8537	0.324582	2.33455	0.103177	0.308755	0.15293	2.60564	0.371454	0.344993	1.91872	0.453468	0.258977	0.182641	0.778231	0.184864	0.527696	1.93978	0.213138	0.26169	0.217369	0.156562	2.06909	0.179484	0.207265	0.325386	0.847034	0.758262	0.49616	1.85201	2.19043	6.9712	0.488537	0.913307	0.594745	1.69307
AC026124.2	0.238124	0.256109	0.677277	0.251798	0.429688	0.0854916	0.158714	0.468731	0.104859	0.101813	0.581974	0.504129	0.812111	0.110562	0.690105	0.279904	0.619447	0	0.257478	0.363581	0.589103	0.179202	0.423975	1.48434	0.293669	0.1178	0.323078	0.273051	0.291507	0.271551	0.614028	0.622091	0.16338	0.276848	0.147705	0.211031	0.205151	0.47996	0.390396	0.593518	0.316166	0.300916	0.227429	0.399971	1.3385	0.144701	0	0.339172	0.535263
AC024075.1	1.75746	1.01104	1.47096	1.45213	0.950997	2.00295	2.09759	2.25266	1.84777	0.978599	2.0627	2.55029	1.4831	1.48777	1.84253	1.29344	1.41406	1.7292	1.01242	1.31049	2.28065	2.84203	1.01878	1.78338	1.96018	2.64195	1.24213	1.37786	2.37082	2.44694	2.2132	1.05318	1.57036	1.21962	1.71547	1.20434	1.76058	1.18535	2.52564	3.48156	0.794258	0.667458	1.48335	1.20138	1.60816	1.33287	0.227246	1.0414	2.02117
AC004253.1	0.36583	0.344278	0.385185	0.169241	0.182404	0.287308	0.533384	0.290814	0.281916	0.0684318	0.74321	0.642014	0.393009	0.237799	0.566917	0.405207	0.41635	0.336473	0.377583	0.0349106	0.307965	0.626327	0.0518122	0.194668	0.263179	0.580633	0.144767	0.440463	0.301432	0.501924	0.242769	0.266081	0.483176	0.248104	0.364016	0.283681	0.11819	0.17922	0.322951	0.797844	0.309098	0.342278	0.829824	2.01625	2.49902	0.0648387	0	0.506595	1.23349
LINC01004	1.24305	0.360759	1.11806	1.31442	1.82329	1.26446	2.5776	0.731964	1.88542	0.885801	2.97049	2.07761	1.58269	1.103	2.13479	1.31128	4.92228	0.435541	0.502331	1.12973	1.67049	1.01862	1.31899	1.19692	1.62763	1.68538	1.1993	2.37562	1.76883	2.71695	3.22627	1.34489	1.8005	1.37382	1.88477	1.43822	1.2579	1.06714	1.95084	2.49076	1.03361	0.631017	3.9197	3.42185	4.26994	0.391669	0.274262	0.699469	1.1975
AC007038.1	0.180938	0.227038	0.323291	0.245537	0.380913	0.568403	0.844188	0.319634	0.557737	0.406152	1.03182	0.211691	0.201579	0.235228	0.339871	0.248131	1.20809	0.610199	0.14525	0.207199	0.522232	0.444809	0.307512	0.641877	0.376037	0.730999	0.324592	0.314673	0.397565	1.20363	0.576346	0.325872	0.608304	0.409037	0.218231	0.67815	0.181863	0.354565	0.772027	0.711844	0.382196	0.348837	2.36175	1.15235	1.9776	0.662756	0.251506	0.868606	0.949007
AC005261.3	0.853956	0.381245	1.33251	1.59813	1.18899	1.57922	1.82298	0.905129	1.39065	1.76015	1.35068	1.87253	1.30782	1.37202	1.41642	1.80506	1.52567	1.14109	1.28605	1.09476	1.47264	1.23923	0.456396	2.04057	0.880936	1.19031	1.36702	1.69422	1.39133	1.31835	1.35151	0.87056	1.45483	0.990745	1.77232	1.01203	1.38813	1.46502	1.52195	1.47173	1.07548	1.65551	3.23163	1.705	2.712	1.54208	0.492721	2.35616	3.25961
AC058791.1	0.27912	0.120081	0.272514	0.0413207	0.0695851	0.797921	0.0325568	0.147923	0.0573588	0	0.0358138	0.0653123	0.0599713	0.0272152	0.133696	0.0220831	0.0381198	0.0128361	0.0384116	0.0426176	0.25511	0.249964	0.0316252	0.178232	0.676024	0.910184	0.0441817	0.140026	0.0505969	0.619693	0.0518636	0.00580038	0.140758	0.0504794	0	0.286785	0.0420822	0.142211	0.209443	0.594413	0.112021	0.237409	0.573155	0.287158	0.671156	0.00989408	0.174591	0.231912	0.188224
AL354920.1	2.4008	1.84136	0.858932	1.66053	1.15126	1.03856	1.28539	0.896891	1.05143	1.41353	1.00999	1.4121	1.31542	1.03612	0.820607	1.1708	1.00335	1.57466	0.90722	1.5474	1.21168	1.96965	2.92085	1.44507	1.22693	1.90807	1.47024	1.4058	1.76415	0.687259	0.940248	1.2759	1.32318	1.58372	1.22471	0.747726	1.5767	1.20315	1.14656	1.35316	0.781468	0.776641	0.883359	0.751973	0.860333	0.530145	0.711195	1.63504	1.23856
LINC01876	0.166867	0.071788	0.153334	0.0576399	0.0517691	0.153765	0.0648782	0.235822	0.194315	0.0998844	0.399665	0.156183	0.0956073	0.0795428	0.21314	0.0422464	0.0607713	0.040927	0.0995092	0.0679417	0.0107027	0.210969	0.20167	0.118392	0.448165	0.0898869	0.11974	0.303596	0.307984	0.0222006	0.153552	0.129459	0.224399	0.100594	0.0724534	0.267418	0.0479201	0.0784781	0.422283	0.411017	0.0845937	0.703976	0.0424993	0.850186	0.29181	0.0630933	0.402041	1.34331	1.12526
AC020915.2	0.243443	0.130915	0.124278	0.210228	0.161842	0.0509841	0.33128	0.172021	0.125068	0.0607176	0.277655	0.379761	0.15498	0.158244	0.182913	0.179765	0.738832	0.373179	0.0837548	0.0929257	0.390355	0.299235	0.0459715	0.172723	0.27243	0.374676	0.256896	0.195406	0.294198	0.76923	0.301563	0.10118	0.116921	0.0733787	0.176172	0.377553	0.349555	0.159017	0.501454	0.374773	0.137127	0.138043	0.813784	0.477056	1.24169	0.258883	0.112796	0.898977	0
AC099343.3	0.227711	0.419845	0.423469	0.288944	0.173009	0.286135	0.34149	0.172397	0.60164	0.389443	0.500871	0.380592	0.776596	0.31718	0.329963	0.37061	0.236943	0.0897589	0.290985	0.322847	0.156483	0.54837	0.294861	0.276962	0.312029	0.375496	0.144176	0.417776	0.364531	0.227216	0.518096	0.351523	0.187482	0.117663	0.423736	0.126126	0.0840767	0.280482	0.488192	0.634334	0.302339	0.796864	0.217483	0	0.213327	0.438181	0.180869	0.540565	0.0731221
SNHG17	4.88321	2.3852	4.23328	1.37321	3.17196	2.15032	1.48613	1.63864	4.01507	1.56363	3.20578	4.1165	4.30676	3.38559	6.89746	3.56652	2.15507	1.09342	1.55164	1.23316	3.05682	1.89843	2.86306	3.20555	2.08632	2.4676	1.61343	2.40911	1.89057	2.41503	2.05471	1.33827	2.26849	1.64383	3.52996	2.88546	3.36653	2.16037	1.78834	3.77519	5.77451	10.128	10.5294	9.90352	19.0998	3.28431	11.2487	4.20496	27.2379
AC010761.1	0.595746	0.587346	1.06445	0.771695	0.379553	0.842173	1.04232	0.473584	1.30077	0.780076	1.4014	1.12295	0.900748	0.613145	1.70654	0.691293	1.22043	0.662092	0.427003	0.416908	1.31349	0.9415	1.35	0.8982	1.26193	0.544406	0.392917	0.996227	0.85085	1.65951	0.527124	0.866612	1.1445	0.718279	0.682608	0.654453	0.556022	0.52534	1.46819	2.67497	0.713092	1.38503	1.61214	1.31336	6.51135	0.950294	0.96611	1.18247	3.18045
SNHG1	5.31749	4.88841	3.2939	3.1312	2.05391	4.86018	3.89467	2.53784	5.55526	3.78758	5.55993	4.04094	3.61404	2.49872	4.02435	2.93694	4.84686	2.37162	2.46106	1.45145	4.85865	4.23154	7.84245	3.64841	5.51657	7.4959	2.65959	3.82946	4.77406	4.79017	3.2425	2.68663	4.70256	2.50896	2.94948	5.06328	2.31873	1.96062	3.71866	8.64648	5.16554	5.4052	17.4264	16.6782	25.0008	6.60457	10.1084	8.98438	31.5448
DICER1-AS1	0.539604	0.335319	0.330562	0.323968	0.171394	0.391764	0.475546	0.413068	0.363466	0.538335	0.605178	0.61729	0.337796	0.265016	0.202718	0.292202	0.38212	0.507331	0.445552	0.219706	0.542218	0.859093	0.312488	0.561513	0.5751	0.622867	0.24675	0.404251	0.335933	0.460659	0.35013	0.199351	0.46073	0.41204	0.316733	0.553261	0.423561	0.34307	0.576921	0.479962	0.172238	0.244783	2.67992	0.740193	0.655304	0.22528	0.316691	0.850187	1.40162
LINC01703	0.244629	0.263106	0.270581	0.261551	0.144561	0.20493	0.38045	0.374528	0.558567	0.366081	0.325509	0.31801	0.259559	0.31803	0.30634	0.292466	0.0494954	0.149999	0.13092	0.166006	0.183053	0.400924	0.092391	0.289275	0.36501	0.690253	0.189308	0.458168	0.268756	0.162732	0.0865807	0.158158	0.443852	0.245787	0.09835	0.358315	0.140503	0.362195	0.407917	0.306859	0.321522	0.443888	1.01245	0.319587	1.0695	0.0385399	1.96467	0.271007	1.40526
ACBD3-AS1	0.375403	0.628066	0.287466	0.216123	0.2773	0.419308	0.535178	0.176844	0.471441	0.24968	0.499519	0.357875	0.159326	0.379589	0.564123	0.211205	0.379773	0.0383642	0.114804	0.25475	0.32104	0.439464	0.236302	0.221958	0.160039	0.240738	0.264099	0.234365	0.247456	0.624313	0.398595	0.520083	0.400663	0.37718	0.181111	0.323449	0.0718711	0.163476	0.478691	0.599326	0.458159	0.312208	1.19514	0.367823	0.729433	0.591426	0.231918	1.29385	1.31265
AL133406.2	0.353921	0.220378	0.385127	0.482578	0.210521	0.678795	0.477997	0.612054	0.459349	0.390255	1.38625	0.770036	0.40912	0.544873	1.36459	0.518758	0.712313	0.137061	0.281979	0.142207	0.681004	0.549514	0.295476	0.257715	0.821903	0.537542	0.31844	0.478455	0.368361	1.35685	0.771348	0.247741	0.715708	0.25266	0.404401	0.346668	0.738209	0.350422	1.57863	1.83528	0.157387	0.443626	1.69013	0.438031	1.14012	0.2245	0	0.453991	1.04678
AP003486.1	1.3186	0.93745	2.07934	1.49298	1.24806	1.32694	2.43738	3.10318	1.49264	1.83947	2.0838	1.90879	1.62198	1.73604	2.27324	1.77527	2.19763	3.35572	1.63392	1.36069	2.05342	1.93671	0.753339	2.66393	2.25092	1.66395	1.71221	1.68627	1.37376	2.22449	1.96364	1.59766	2.1897	1.36414	1.81141	2.08399	1.80029	2.22481	1.81019	2.44855	1.72782	0.836412	2.25194	1.56022	1.72211	1.27944	0.419386	2.03643	1.05498
AC010487.1	0.413253	0.19754	0.703219	0.577788	0.396836	0.634678	0.0535579	0.438017	0.377435	0.343567	1.68892	0.608842	0.175389	0.268624	1.39725	0.261562	0.334451	0.126697	0.347542	0.420651	0.397584	0.483773	1.14456	0.293203	0.660654	1.11304	0.261653	0.405419	0.544811	0.82471	0.828811	0.267176	0.573376	0.373688	0.498428	0.427272	0.435146	0.215949	0.608024	1.93213	0.271574	0.0312442	0.526256	0.539878	1.00372	0.0325527	0.255301	1.37344	0.309641
AC018695.4	0.0971653	0	0.223213	0.119869	0.129192	0.162794	0.302225	0.308964	0.133116	0.193873	0.415575	0.252623	0.154643	0.147373	0.547543	0.102499	0.294889	0.178736	0.022286	0.0741787	0.467407	0.238867	0.110091	0.0344695	0.341738	0.0747721	0.102535	0.233976	0.298895	0.355499	0.171947	0.0538451	0.279999	0.146438	0.14063	0.3265	0.195325	0.253874	0.371698	0.963979	0.109463	0.198348	0.804279	0.28561	1.27439	0.321464	0	0.538212	0.58243
AP000692.1	0.112327	0.201352	0.114686	0.194003	0.149351	0.423442	0.393057	0	0.0384718	0.39222	0.0960844	0.146021	0.214528	0.121692	0.253193	0.0710958	0.204542	0.172188	0.0772905	0.114338	0.324204	0.157794	0	0.0796962	0.215489	0.432198	0.142241	0.30054	0.197448	0.448332	0.516821	0.186741	0.287724	0.13543	0.108383	0.464551	0.0322576	0.0293488	0.165268	0.691695	0.126544	0.152866	0.786736	0.330177	0.327388	0.716707	0	0.290357	0.925805
ZDHHC20-IT1	0.101435	0	0.0776738	0.0750815	0.0337172	0	0.177471	0.16127	0.208447	0.075897	0.347069	0.0395585	0.0968627	0.0989026	0.0571602	0.0963025	0	0.18659	0.0348978	0.038719	0.292766	0.213739	0.0574644	0.161928	0.194593	0	0.0963361	0.122128	0.167158	0.0506072	0.215402	0.168633	0.194868	0.0458617	0.14681	0.117985	0.174778	0.0397543	0.179091	0.156155	0.128557	0.138043	1.11411	1.34172	0.99779	0.071912	0	0.505674	1.25405
AL354733.3	0.343317	0.369248	0.613424	0.508244	0.15216	0.790907	0.600672	0.242594	0.587928	0.171255	1.32153	0.937231	0.819608	0.520718	0.644884	0.434596	0.833554	0.578906	0.393719	0.087366	1.3212	0.482284	0	0.791649	1.31724	1.58517	0.398518	1.24007	0.414894	1.94124	1.57962	0.332942	0.384739	0.36219	0.414079	0.84304	0.542259	0.403659	0.707179	2.64263	0.386769	0.389351	1.09299	1.00916	0.750475	1.05471	0.318144	1.58474	0.90034
AL928654.2	0.551623	0.593286	1.34402	0.37119	0.633428	0.819182	1.81326	1.0099	1.28816	0.375221	2.40218	1.76013	0.909857	0.912719	1.13036	1.14264	1.73501	0.368986	0.96616	0.689112	2.02634	1.3737	0.568187	0.747174	1.20254	1.50502	0.539771	1.12706	1.25613	1.40108	2.02333	0.500215	1.83044	1.08831	0.943541	1.12771	0.864069	0.589614	1.37236	3.55122	0.889786	1.05781	2.92161	2.80069	2.1924	0.959904	0	2.55552	7.10156
LINC00997	0.691566	0.671233	1.14955	0.824024	0.76813	1.00677	1.25916	1.86828	0.719245	1.2747	1.61598	1.01961	0.732877	0.915516	1.72993	0.816715	1.09038	1.38849	1.21865	0.798379	1.09539	1.26176	0.258003	1.77717	0.995027	1.36291	1.01458	0.737878	1.01179	1.08559	0.662651	0.701044	1.33668	0.793133	1.06196	0.882883	1.19161	1.44113	1.82407	0.917497	0.869353	0.969845	1.80431	1.93364	1.40111	0.735426	0.398582	2.52264	1.08058
AC015922.3	4.85123	4.83501	3.44241	6.65505	5.67621	5.56761	6.79021	6.30744	4.75199	8.76006	6.39059	6.35687	4.32373	6.68524	6.67035	6.69372	10.1295	8.23969	2.93749	6.29605	4.04498	6.26969	5.27673	8.91465	4.83944	6.64508	5.77458	6.3082	5.96923	5.22795	8.1728	4.83903	6.30638	5.41035	7.95751	5.19135	6.15774	5.39967	4.76797	5.3108	6.25767	2.44275	6.79557	3.04209	2.2623	2.79727	1.61838	1.46898	0.945077
B4GALT1-AS1	4.23547	2.53392	2.75682	3.58575	5.08597	7.48432	3.0568	2.16047	2.03996	3.16913	2.35496	3.38617	2.98287	3.42424	3.2818	4.60759	4.14552	0.852159	3.3333	4.62791	3.20897	1.00404	7.5883	3.23984	2.92005	3.51398	3.70412	3.25096	3.94358	1.71692	3.87877	2.88256	2.87332	5.29014	4.84664	2.01168	4.15071	3.92167	2.57058	3.34169	2.19192	1.24287	1.16301	1.40061	1.27305	0.731915	4.48911	1.61293	0.595039
AL604028.1	2.98537	1.64556	2.4575	2.48598	2.43125	3.23553	2.52456	1.58213	2.30059	1.17272	2.45792	2.50316	2.35192	2.32868	2.69169	2.1966	3.26173	1.47587	2.25961	2.36458	2.87218	2.79148	2.70601	2.22403	2.21927	4.13522	1.77207	2.66586	3.36999	2.12246	2.73395	1.55097	3.11854	2.86827	2.94356	2.25711	2.63628	2.4278	2.86605	2.45114	1.5765	2.006	3.67103	4.71671	4.07867	1.53444	2.17859	2.35643	2.76812
AC009065.5	1.29795	0.710237	0.924159	0.910172	1.60466	1.74542	0.743689	0.748204	0.865694	0.54522	0.759655	0.852525	1.26119	0.917709	0.744249	1.15301	1.28542	0.586425	1.31615	1.02566	1.48972	0.8157	2.03823	1.26018	1.0921	0.972534	0.922729	1.46222	0.840565	0.8407	1.37814	0.965338	1.18114	1.72964	0.856889	0.741622	0.74548	1.37436	1.10561	0.888068	0.654153	0.759234	0.956927	0.736272	0.696869	0.258296	0.886258	0.655886	0.46067
LINC02487	0.270545	0.112637	0.380926	0.200257	0.847083	0.548323	0.132334	0.342259	0.242115	0.143661	0.134375	0.245055	0.100007	0.414125	0.0590156	0.414285	0.381407	0.0240808	0.108092	0.732891	0.243495	0.110339	0.0889945	0.130032	0.385076	0.705174	0.226555	0.287211	0.402696	0.226416	0.528186	0.217634	0.226342	0.220968	0.334728	0.16242	0.458646	0.69092	0.192608	0.689682	0.265459	0.166277	5.13455	1.28266	1.83143	0.290798	1.45572	0.812138	0.294262
LINC02614	0.457451	0.217479	0.276681	0.348418	0.213762	0.391544	0.375048	0.333783	0.483652	0.267872	0.884684	0.51969	0.421005	0.351223	0.963878	0.358774	0.633802	0.137198	0.317046	0.151839	0.471998	0.289876	0.262909	0.448037	0.537356	0.593085	0.510015	0.529489	0.701408	0.592071	0.710968	0.203903	0.678216	0.470607	0.400608	0.413848	0.614006	0.37156	0.772549	0.860726	0.148442	0.234582	1.32971	0.36052	0.637658	0.101053	0.0645078	0.282766	0.335306
AC074032.1	1.03887	0.795023	0.566038	0.857691	0.504701	0.728018	1.32825	0.592911	0.923736	0.896903	0.563947	0.903789	0.49602	0.805152	0.945676	0.834564	0.763966	0.55125	1.14097	0.686336	1.23013	0.652508	1.4487	1.27571	0.881504	1.03774	0.860154	0.785762	0.671624	0.737588	0.912133	0.431773	0.748418	0.812946	0.852994	0.945009	0.740106	0.767326	0.652551	0.984185	0.776481	0.584549	0.896803	0.469795	0.65507	0.354088	0.833098	0.37625	0.94306
AC092755.1	0.460116	0	0.528502	0.340576	0.917663	1.73451	0.268342	1.21922	0.236383	0	0.787166	1.25608	0.659066	0.44863	1.03713	0	0.83785	0.63479	1.26639	0.526898	1.32801	0.727155	0	0.24484	1.10336	0.531114	0.582651	0.553985	0.151648	0.688676	0.244271	0.382466	0.662952	1.24819	0.166485	0.713588	0.396403	0	0.406185	1.41667	0.194381	0.156543	0.219726	0	0.502896	0.163099	0	0.509729	0
RAB30-DT	2.04874	1.77859	1.92761	1.48927	0.94669	1.0159	1.35021	1.55803	1.48204	1.55356	2.31831	1.55498	1.64934	1.61838	1.70845	1.56421	1.90715	1.23369	2.48437	1.52198	1.21976	2.05204	2.14433	2.3857	1.14561	1.16653	1.09358	1.90257	1.50188	1.46676	1.73634	1.77172	1.3149	0.988603	1.82167	2.26547	1.03686	1.33944	1.37876	2.14979	1.48263	1.23778	2.07957	5.04994	2.61075	0.853233	1.55798	1.17045	1.34233
AC104083.1	6.1016	9.70141	1.32654	1.4465	2.22959	1.91946	9.38641	13.4229	0.89437	16.3334	4.84701	3.2748	1.57277	3.67774	2.30827	2.37657	2.89034	19.1199	3.16496	3.53757	1.14942	12.4884	1.45034	17.6736	1.2442	2.81724	1.77764	0.746626	1.21504	6.19905	2.17462	1.31231	1.6968	0.956869	1.90207	6.48506	3.6466	4.10708	4.2338	1.30498	4.54971	1.09748	2.48588	1.93148	1.7535	4.24102	0.711718	2.78889	1.34276
AL078581.2	1.18142	1.76479	1.40727	1.02023	1.91989	1.48454	1.45457	0.904376	1.07902	0.491099	1.01058	1.07506	0.752111	0.682622	0.961636	1.28781	1.55372	0.724407	0.812914	1.10235	1.32606	0.484057	1.04112	1.25732	1.25913	1.06066	1.32982	0.790243	1.12487	0.982375	1.32409	0.818366	1.00873	1.00896	1.18743	0.559852	0.565457	1.23472	1.04294	0.808334	0.942749	0.401947	0.376119	0.192927	1.72168	1.11675	0.182465	0.799825	1.91795
LINC01705	0	0	0	0	0	0	0.0463152	0	0	0	0	0	0	0	0	0.0251323	0	0	0	0	0	0.0836703	0	0	0	0	0	0	0	0	0	0	0	0	0	0	0	0	0	0	0.0670996	0.027019	0.151697	4.55198	2.43036	1.60458	5.85056	2.15546	0.892559
SREBF2-AS1	0.664467	0.586176	0.931877	1.07762	0.640277	0.919385	0.957914	0.712198	1.25808	0.70387	0.951564	0.908428	1.20487	0.922076	0.572176	1.12938	1.19637	0.583678	0.92983	0.723861	0.811662	1.30575	0.304529	0.921692	1.03123	1.21513	0.836696	0.904897	1.06793	1.06531	0.77686	0.99916	1.11157	0.823638	1.1454	0.903146	0.572457	0.848553	1.13362	1.17234	0.889446	1.09224	1.31203	0.987548	1.61569	1.14857	1.43213	1.05868	1.77891
LINC02747	14.6619	8.76074	14.3108	17.9741	15.1421	20.8957	14.1977	7.13497	12.1594	7.22172	6.17887	13.6177	17.9343	12.148	6.09709	14.3773	12.2579	1.35702	14.1495	21.6357	12.6274	5.01964	28.6277	7.42579	17.9261	16.1083	21.4469	21.2183	22.6929	9.35467	11.7166	14.9981	17.4791	23.5979	18.7516	6.0542	22.0061	15.7813	11.2881	17.4768	8.05103	11.5872	11.0383	3.52371	5.71126	0.15254	5.81073	0.817252	2.14189
AC048341.2	0.227247	0.586585	0.591649	0.370056	0.211505	0.513994	0.477112	0.481729	0.933979	0.408082	0.699792	0.389945	0.477409	0.236346	0.768345	0.460265	1.90351	0.627033	0.469095	0.138789	0.56844	0.814039	0.205982	0.386957	1.13347	1.04925	0.517978	0.766101	0.62914	0.770961	1.0134	0.226676	0.218284	0.328784	0.361792	0.634381	0.352403	0.21375	0.561711	1.02619	0.422413	0.371112	1.38906	1.33595	1.88765	1.19219	0.379051	1.6112	0.510813
AC137932.1	0.0863274	0.185695	0.330527	0.0319496	0.172173	0.0542384	0.503465	0.594754	0.221752	0.0645932	1.18151	0.370334	0.247309	0.22446	0.583764	0.300519	0.628793	0.635199	0.445504	0.296571	0.830543	0.454765	0.0978117	0	0.91086	0.199296	0.300623	0.277171	0.312976	0.77526	1.00827	0.0717587	0.456074	0.351281	0.406069	0.836775	0.297494	0.135334	0.762089	0.930288	0.10941	0.0587415	0.577152	0.38063	0.377415	0.336609	0	0.191272	0.485124
AC005674.2	0.356033	0.389762	0.876319	0.310594	0.342359	0.639117	0.659998	1.14558	0.574863	0.50425	0.978911	0.892601	0.473551	0.405003	0.924334	0.342043	0.810399	0.894674	0.647449	0.38344	1.49247	0.870791	0.468228	1.27882	0.841572	0.5871	0.398518	0.658311	0.486139	1.06578	1.3906	0.50734	0.659553	0.36219	0.308258	0.81839	0.350551	0.388709	0.634216	1.76828	0.35991	0.237937	1.20837	0.280321	0.833861	0.315511	0.282795	0.253557	1.05754
VPS13B-DT	2.34902	3.34752	0.854411	0.608556	0.585614	0.81172	0.616479	1.74285	0.54306	2.54854	1.75818	1.14511	0.336471	0.64894	0.72804	0.557541	0.534681	1.89045	2.06081	0.851819	0.960479	2.90798	0.931528	2.56244	1.57723	1.08459	0.409006	0.659922	0.696785	0.82037	0.623533	0.829852	0.733318	0.424824	1.06244	1.45722	0.505935	1.10475	1.03684	0.904058	1.04199	0.639355	2.58004	3.625	1.28371	0.874298	1.14281	0.845748	2.37608
AC124319.1	0	0.0367552	0.0785064	0.101182	0.0908763	0	0.159443	0.217331	0.0702272	0	0.584648	0	0.0979011	0.133284	0	0.02163	0.124459	0.0628633	0.164602	0.104358	0.19727	0.180026	0	0.0727395	0.262238	0.118342	0.0216375	0.137153	0.0675799	0.409198	0.399137	0.0568136	0.0656522	0.0618044	0.123653	0.106	0	0.0803609	0.211179	0.210439	0.0577488	0.162776	0.326392	7.93571	6.05092	0.266504	0.855042	0.189295	3.37997
C2orf27A	0.373957	0.430262	0.359612	0.321862	0.0520343	0.098352	0.0912947	0.414801	0.268073	0.559615	0.342199	0.542657	0.348796	0.497468	0.27444	0.0605487	0.316724	0.511922	0.107713	0.265571	0.200806	0.384831	0.0591216	0.601604	0.0750767	0.411582	0.368925	0.258281	0.200642	0.104133	0.120041	0.195183	0.317439	0.0629124	0.0692283	0.1079	0.0524469	0.0681679	0.644894	0.606933	0.374748	1.48533	1.29575	0.766896	0.627345	1.20227	0.701132	1.09832	2.01351
AC026368.1	0.064683	0	0.123828	0	0.0430016	0	0.0377234	0.137118	0.0664614	0.0483981	0.138324	0.100903	0.0926513	0.0420456	0.25515	0.0614103	0.117785	0	0.0222537	0.0246904	0.155576	0.170372	0.036644	0.0344195	0.031022	0.111996	0.102386	0.103839	0.127912	0.0968138	0.103018	0	0.155329	0.0584903	0.0234044	0.050158	0.0278631	0.0253506	0.114203	0.0663849	0.0273261	0.0660203	0.89578	0.0950654	0.565575	0.183428	0.17982	1.32567	0.726982
AGAP2-AS1	3.16882	3.55217	1.92527	2.0262	1.45388	2.84151	1.96086	2.68066	1.88019	2.51573	2.76151	2.21633	2.00312	1.88574	2.21324	2.2034	1.59834	1.83355	1.25911	1.59006	2.16127	5.5957	1.66877	1.77329	1.84085	2.7648	1.26222	2.10169	1.66712	2.47908	1.29529	1.24901	2.24358	1.73541	2.00248	2.19191	2.3327	3.25349	4.26833	2.32082	3.78357	5.95239	1.42089	3.67333	2.11384	7.12983	13.2348	7.56489	3.04315
AL117382.2	2.09363	2.91404	2.58398	2.46128	1.60473	3.99263	2.44203	1.61863	3.01167	0.995206	3.83461	2.8049	2.06983	1.74517	2.22079	1.90196	3.49844	0.271853	1.15248	0.902589	5.6162	1.53109	3.06984	2.30679	4.04006	2.84316	2.33929	3.65756	2.59777	4.17817	2.90294	2.6207	3.28866	2.38319	1.58639	3.66718	1.84616	2.06582	4.52274	5.51083	1.93545	1.07265	53.6598	23.5303	56.2111	0.0873103	1.78034	3.21984	3.65417
AL606489.1	1.05609	0.938315	2.56675	2.34514	1.49577	1.21166	1.71385	2.67677	1.46256	0.961987	1.64965	1.89815	2.63084	2.02961	2.53575	1.33687	1.42142	0.168929	1.16901	1.64755	2.87144	1.11268	0.832406	0.830742	3.03901	1.80207	2.87819	2.46937	2.63325	1.64942	1.56011	2.70993	2.64635	2.32517	1.66143	2.49242	1.38455	2.01553	2.75638	3.48726	1.0863	1.9059	2.14888	1.61963	0.903349	0.944029	0.765902	3.10295	1.75463
AL450384.2	0.467566	0.320015	0.31464	0.251702	0.216646	0.605335	0.413161	0.405478	0.553212	0.360451	0.921109	0.508358	0.351781	0.349979	0.67068	0.313875	0.903016	0.521266	0.770189	0.292052	0.627047	0.731464	0.401339	0.557924	0.502852	0.588777	0.313984	0.341184	0.569716	0.664481	0.616803	0.294438	0.394685	0.320304	0.358868	0.483428	0.244134	0.388709	0.487809	0.79978	0.227457	0.26995	0.893132	0.291534	1.3318	0.35157	0.118168	0.376714	0.700673
HLA-DQB1-AS1	0.363842	1.78269	1.17636	0.987486	0.430016	1.06679	0.471542	0.342796	1.62	0.302488	0.345811	0.220725	1.66	0.762076	0.227812	0.588515	1.25146	0.0371827	0.250354	0.771575	2.06139	1.36298	0.503854	1.20468	0.659218	0.373319	0.947072	0.908588	0.346429	1.29085	1.15896	1.78103	0.698982	0.51179	0.497344	0.188093	0.696577	0.443635	0.927898	2.32347	1.09304	0.302593	1.00389	1.06949	1.76742	7.9963	0.112388	1.65708	1.36309
MCM3AP-AS1	0.237681	0.189358	0.31907	0.321454	0.198978	0.44984	0.225894	0.34834	0.343712	0.223949	0.399095	0.427991	0.257791	0.244146	0.426616	0.315732	0.411434	0.207813	0.212003	0.170252	0.429108	0.333889	0.206131	0.252953	0.430637	0.37597	0.287974	0.350942	0.330755	0.491898	0.27729	0.241474	0.479162	0.289221	0.316399	0.407299	0.275553	0.246106	0.51808	0.653505	0.260325	0.367387	0.86879	0.65552	0.878761	0.168504	0.261041	0.464855	0.639802
AL162724.2	0.43472	0.467554	0.0554813	0	0	0.182086	0.338041	0.537566	0.297782	0.108424	0.433836	0.0565121	0	0.235482	0.489945	0.0917167	0	0.133278	0.49854	0.110626	0.139413	0.229007	0.082092	0.616869	0.347487	0.0836331	0.32112	0.116313	0.143278	0.36148	0.153859	0.180678	0.0695956	0	0.26216	0.280917	0.124841	0.113584	0.191883	0	0.122435	0.147903	0.691993	0.638914	0.475138	0.205463	0.805689	0.401329	0
AC112496.1	0.0794151	0.170826	0.273655	0.146957	0.343171	0.0997909	0.0926304	0.084174	0.244795	0.237685	0.373623	0.0929131	0.0758356	0.154865	0.313262	0.226191	0.361528	0.0365211	1.03824	0.0303138	0.267414	0.167341	0.17996	0.169035	0.114263	0.137504	0.150846	0.223105	0.287916	0.316971	0.379445	0.330064	0.0762828	0.143624	0.086205	0.246328	0.0342091	0.0933731	0.140213	0.366771	0.0335498	0.135095	3.6028	0.583587	0.173597	0.422259	0	0.395902	0.267768
ARHGEF38-IT1	0	0.052634	0.299793	0.253565	0.0976023	0.184482	0	0	0.15085	0	0.251168	0.0381704	0.046732	0.0636216	0	0.0929235	0.0891135	0	0.235713	0.0373605	0.235412	0.2578	0.110896	0.0520822	0.0938825	0	0.123941	0	0.0967756	0.146495	0.103922	0	0.141023	0.0442525	0.0354146	0.189742	0.126484	0	0	0.150676	0.0826973	0.166499	0.327179	0.287698	0.748829	0.0693887	0	0.487931	0.770027
ARRDC1-AS1	3.97325	3.89126	4.10203	2.39431	2.70359	4.12337	3.27136	2.50699	3.70786	2.7281	4.16642	2.95321	3.54419	2.56448	2.87645	2.60357	2.77488	2.36462	2.63101	2.33385	4.72204	3.61486	4.07812	3.06445	3.96359	4.10072	2.48609	3.7145	3.08125	3.06908	3.29555	2.54892	3.50223	3.88873	2.96326	3.86397	2.77872	3.36354	3.40025	4.31766	3.45188	2.37917	3.75015	5.46855	4.7616	1.73649	4.54824	4.27739	2.43769
AC012073.1	0.483371	0.281602	0.771129	0.790118	0.562359	0.658007	0.563808	0.384253	0.724297	0.241117	0.878634	0.832584	0.923168	0.484397	0.703669	0.5354	0.513448	0.0555727	0.457325	0.322892	0.79445	0.59415	0.730233	0.385821	0.850026	0.720694	0.663107	0.969973	0.823117	0.663192	0.577387	0.686403	0.735151	0.49173	0.466399	0.734036	0.485844	0.505181	0.924548	1.07486	0.646651	1.05525	1.15415	1.12483	0.616365	0.514028	1.28779	0.736301	2.44471
SDCBP2-AS1	0.544418	0.538221	0.391623	0.398905	0.350964	0.386966	0.461828	0.617843	0.514183	0.592513	0.738525	0.776352	0.509377	0.343161	0.669357	0.351543	0.510701	0.576598	0.208114	0.298074	0.872961	0.637321	0.392536	0.620365	0.643528	0.418949	0.334256	0.432576	0.387866	0.801136	0.478789	0.255983	0.528227	0.392842	0.310406	0.678023	0.435867	0.370701	0.92723	1.02718	0.274136	0.220773	0.709045	0.387946	1.19007	0.374268	0.229318	0.645766	0.605699
AC115618.2	8.6783	9.17376	8.43019	5.24904	3.75834	7.29072	5.0323	6.93818	8.9169	7.94052	7.76276	6.92361	7.3874	6.86604	6.1479	5.61836	8.48836	9.66949	3.13925	4.46732	6.34544	6.58318	6.91105	7.01928	8.56208	9.33048	6.53087	6.12994	8.98938	8.56049	6.0552	7.62596	7.47859	6.50217	5.95721	10.3443	6.70758	6.99676	6.304	7.53248	9.88839	11.3716	9.2358	7.14258	6.50411	9.91426	1.51649	6.97706	6.4653
CHKB-DT	1.08103	1.32878	0.768675	0.600133	0.795678	0.970285	0.765563	0.286454	0.634718	0.693316	0.660511	0.57216	1.32725	0.401542	0.913772	1.07521	0.70304	0.426122	0.82354	0.618969	0.594312	0.650833	1.61855	0.123267	0.592532	0.267394	0.586683	0.526829	0.559892	0.500819	0.450929	0.57767	1.18674	0.558592	0.838187	0.748465	0.365884	0.514467	0.852076	0.435867	1.0765	0.709319	0.479367	0.567432	1.77232	0.985368	1.28799	0.556028	0.781066
PRKAR1B-AS1	0.610551	1.14916	0.420777	0.361542	0.365308	0.268521	0.320468	0.323569	1.00374	0.411152	0.574491	0.28573	1.22437	0.317499	0.584895	0.656947	0.333535	0.280778	0.546144	0.396195	0.763622	0.900571	0.622596	0.194934	1.22985	0.528571	0.328588	0.441066	0.342091	0.609225	0.259308	0.532889	0.821057	0.552097	0.37556	0.189379	0.368204	0.215358	0.350342	1.15924	1.00594	0.623174	0.116626	1.346	0.80078	2.92173	0.424337	0.608746	0.548966
AL121895.2	0.149769	0.0536938	0.458744	0.406482	0.165946	0.376393	0.931691	0.158744	0.102591	0.0747085	0.469746	0.311512	0.0953459	0.292061	0.787711	0.347579	0.363631	0.0918339	0.0687027	0.343014	0.864545	0.262991	0.0565645	0.478177	0.143659	0.230506	0.37931	0.480864	0.592345	0.547962	0.318043	0.290486	0.47954	0.451435	0.433532	0.15485	0.516122	0.430449	0.308501	0.30742	0.295268	0.203821	2.241	0	0.982165	0.106179	0	0.0553062	0
TRAM2-AS1	3.70759	3.35601	1.97327	1.55707	1.55581	3.14996	2.07538	1.76514	1.94529	3.23978	1.85939	2.03728	2.01715	1.73772	2.12386	1.80299	2.12276	2.48298	2.67778	1.86022	1.56847	2.42871	4.97543	1.77235	2.55585	3.2477	1.78142	1.95585	2.03373	1.55678	1.49834	1.39159	2.07114	1.83879	2.12488	2.07301	2.22007	1.78629	1.82608	2.34785	2.27356	1.7952	4.01823	2.03536	2.79733	1.11851	1.65695	2.83534	2.36426
AC012557.1	0.292185	0.589225	0.419515	0.216274	0.121404	0.413046	0.724215	0.851659	0.187637	0.601214	0.624837	0.256385	0.348769	0.308632	0.28814	0.277402	0.266028	0.806214	0.477489	0.334593	0.562214	0.461761	0.372437	0.544177	0.140132	0.548064	0.601246	0.322478	0.361127	0.947539	0.504133	0.303595	0.456074	0.165132	0.317167	0.424824	0.44052	0.229026	0.257938	0.337357	0.339452	0.248522	0.662773	0.107357	0.479026	0.440181	0.304606	0.364152	0.903076
LINC02195	0.151807	0.0816364	0	0	0	0.0953784	0	0	0.155981	0.113587	0	0.0592031	0.0724823	0	0.171092	0	0	0	0.052228	0.347681	0	0.0799706	0	0	0.0728068	0	0.0480588	0.121852	0	0.0757387	0	0.063094	0	0.0686365	0.0549288	0.235436	0	0.0594962	0	0	0.0641326	0.568134	0.144989	0.669338	1.65921	2.79821	0.844055	0.084088	0.511855
AC006042.1	0.553632	0.458037	1.43489	1.45005	1.47223	2.51515	1.93728	1.35417	1.22522	0.701034	3.97076	2.65736	0.935354	1.41182	2.20787	1.42861	3.56726	0.352526	0.820498	1.0729	1.51598	1.8845	0.0482525	0.951791	1.67483	2.40876	1.07857	2.0852	2.02121	2.84714	2.57743	0.637201	3.06805	1.34784	1.20193	1.75027	1.4676	1.03483	1.91737	3.75886	0.755639	2.52112	17.4493	3.63027	2.88589	0.573649	0.473573	4.62355	7.08392
AC011462.4	0.397606	0.0534546	0.342526	0.147153	0.132165	0.187358	0.463771	0.263395	0.204269	0.0743757	0.765251	0.542717	0.379685	0.323067	0.672173	0.377489	0.362011	0.548549	0.102595	0.151772	0.812878	0.366547	0.112625	0.211577	0.429058	0.516327	0.18881	0.398935	0.491422	0.495928	0.263856	0.206566	0.429664	0.539309	0.143867	0.346861	0.171274	0.194787	0.351002	0.714119	0.12598	0.405827	0.522154	1.16873	0.97779	0.281882	0.138169	0.991077	1.56407
AC123023.1	0.0402084	0	0.0307896	0.0297621	0.0267307	0	0.0937987	0	0	0	0.0687883	0.0313617	0.038396	0.0261364	0	0.0508986	0	0	0	0	0	0.0847256	0	0	0	0.0464126	0	0	0	0	0.0426923	0	0	0.0363588	0	0.0935379	0	0	0.0354955	0.0412663	0.101919	1.25855	3.49463	0.945516	3.69152	0.570113	0	6.45886	0.0903816
AC116366.2	0.448706	0.746415	0.659706	0.385271	0.393759	0.563832	0.732723	0.431206	1.11265	0.295449	0.926291	0.569302	0.811258	0.754453	0.66079	0.393816	0.675447	0.445714	0.633961	0.429335	0.63315	0.775307	0.244031	0.496638	0.648469	0.65606	0.43941	0.523439	0.709861	1.23574	0.800395	0.815587	0.92523	0.465256	0.424292	0.375782	0.422652	0.304819	0.686595	1.01927	0.343737	0.309393	0.697113	1.03756	0.680055	0.593804	0.0332644	0.556739	0.537928
AC090617.5	1.3601	2.11296	1.58153	1.23046	1.17211	1.32927	1.17513	1.38821	1.70804	1.95996	1.50814	1.57162	1.92414	1.37526	2.55479	1.65794	0.733828	1.85326	0.970522	1.03833	2.9563	1.3799	1.76933	1.98359	1.73947	1.62811	1.05252	1.25345	1.42782	1.70899	1.28366	1.42367	1.40322	1.32098	1.27588	1.36717	0.998165	0.947642	1.77878	1.34418	1.78761	0.925477	0.817895	0.592281	1.21126	1.10709	2.10061	1.11611	2.26464
AC004492.1	0.270675	0.226426	0.322419	0.333921	0.319904	0.340123	0.315717	0.669422	0.339921	0.540076	0.5917	0.422241	0.315914	0.234594	0.711806	0.228426	0.383356	0.525569	0.60013	0.229601	0.376151	0.53867	0.136304	0.448103	0.548112	0.694313	0.285633	0.144842	0.495616	0.9303	0.574793	0.199996	0.346665	0.24476	0.391756	0.559715	0.492298	0.306462	0.530997	0.771658	0.228699	0.204645	0.718106	0.795629	1.05188	0.255859	0	0.499768	0.202811
AL136295.7	1.87823	1.46007	1.40978	1.40403	1.22393	2.00962	2.34262	1.91194	2.15916	1.66973	2.79969	1.79859	1.47393	1.28134	2.05396	1.68315	2.09951	1.76172	1.50991	1.07897	2.48689	1.86132	1.30636	2.65202	2.15836	1.8246	1.13034	1.68673	1.29937	2.3195	1.73758	1.20573	2.5008	1.21075	1.65528	1.68719	1.47396	1.83665	2.64308	3.09188	1.22557	1.01231	0.888058	2.13184	1.26017	1.02834	1.18906	1.05068	2.7589
HOXB-AS2	0.369727	0.255633	0.283119	0.390957	0.105341	0.530958	0.616074	1.25962	0.217081	0.869448	0.9262	0.453167	0.277406	0.326164	0.208347	0.267444	0.384717	1.26307	0.436119	0.14113	0.584378	1.33556	0.0299223	0.309165	0.709285	0.579197	0.535074	0.19078	0.382979	1.18583	0.869256	0.39514	0.938594	0.453732	0.592451	0.327659	0.568803	0.124203	1.28225	0.786013	0.133882	0.23361	3.75822	0.543392	0	0.243394	0	0.468106	0
AC008771.1	2.95536	2.91211	1.5042	1.25751	0.870603	2.93532	0.784383	1.61312	1.49103	1.50951	1.27157	1.15946	0.946351	1.3804	1.59559	1.1985	1.57903	0.895216	0.913266	0.702531	1.75366	2.74082	2.60663	0.979359	2.73294	4.28976	1.43422	1.56252	1.27151	1.55393	0.770392	1.0003	1.29191	1.24819	1.42153	2.525	1.18921	0.915515	1.96844	1.77992	1.36067	3.82928	4.17479	2.60092	2.43711	1.38007	2.55827	3.33284	1.31272
AL049840.6	3.41201	2.45634	6.48973	4.50119	5.65251	5.53218	5.74502	6.24133	5.65455	3.33535	8.0733	7.23271	6.46389	5.04391	7.34977	5.32929	7.91671	5.03631	3.76776	5.77682	7.14769	6.69682	3.30473	6.03254	6.46643	4.54197	4.94787	7.73028	7.29146	8.97826	7.94677	4.57451	7.40065	5.051	5.45603	5.37699	5.35755	5.2411	6.31566	9.48871	4.71956	5.95404	6.88546	5.3382	6.19535	8.44677	11.3979	9.66317	8.10258
HCG11	2.29573	1.74066	1.99818	2.36423	1.27026	2.15909	2.77755	2.89427	2.21234	3.64888	2.02475	2.75822	2.6416	1.73791	1.15708	2.07579	1.9474	4.29514	1.34418	1.77439	1.72168	3.4929	1.05015	2.86056	3.01588	2.23025	1.83726	1.71682	2.07254	2.29074	1.51401	1.35715	2.41748	1.68912	1.87288	1.65858	2.13139	1.68213	2.25323	1.80003	1.63249	0.553052	3.58855	2.7244	3.00789	2.18355	0.872101	0.639767	2.32379
USP12-AS1	0	0	0	0	0	0	0	0	0	0	0.0712267	0	0.0795142	0.0541258	0.0938451	0	0	0	0	0	0	0	0	0	0	0	0.0527212	0	0	0	0.0884113	0	0	0	0	0	0	0	0	0.0854582	0	0	0.0795276	0	0.182018	0	0	0	0
AC020907.4	0.509102	0.136888	0.45482	0.0942088	0.0564089	0.106621	0.346395	0.0449675	0.0871832	0.126976	0.943551	0.198544	0.364616	0.11031	0.334702	0.10741	0.154508	0	0.204345	0.0647771	0.775516	0.312889	0.0480691	0.270906	0.325554	0.244857	0.134309	0.170268	0.25169	0.42333	0.360369	0.105796	0.44827	0.11509	0.122807	0.460576	0.182752	0.0997636	1.01122	1.13208	0.071692	0.288682	1.45871	1.49647	3.33861	0.421081	0.117943	0.986994	3.33776
AC097376.3	0.490978	0.380204	0.311515	0.417413	0.38609	0.497085	0.323973	0.437136	0.302686	0.419848	0.439181	0.483614	0.359003	0.284497	0.553349	0.395994	0.449578	0.459319	0.588797	0.278442	0.561436	0.390181	0.476823	0.52551	0.589356	0.527875	0.374815	0.470662	0.564058	0.467516	0.470668	0.303175	0.36651	0.309511	0.347183	0.411183	0.396403	0.321073	0.505255	0.53269	0.260755	0.272996	1.10667	0.552537	0.355706	0.163099	0.116994	0.599864	0.227033
NEAT1	3.66683	4.55417	8.78017	6.19668	11.8531	9.82743	10.8498	11.4197	14.7735	6.0579	15.8105	11.9746	8.4642	7.18182	15.089	8.11157	14.9535	3.43659	19.3619	6.04471	21.2253	11.2698	2.53099	8.23778	12.1754	6.60409	4.88726	11.098	10.107	12.7009	26.5458	4.82826	13.4599	9.92161	8.24229	18.2713	4.79224	3.80309	13.9891	31.8539	8.18234	5.24297	18.3729	49.1265	76.8427	8.88768	2.308	11.6329	31.6874
MHENCR	2.73025	1.94766	1.94136	1.89719	0.963107	2.87064	2.37219	1.38787	3.03432	1.33412	3.88448	2.15127	2.15492	1.3401	3.01429	1.83387	2.94241	1.10183	1.30355	1.08471	3.27002	2.78849	2.49371	2.28303	3.04643	2.89427	1.25241	2.72819	2.33228	2.25174	1.95233	1.04211	2.97046	2.51924	1.89515	2.03074	1.58413	1.74701	3.78751	4.68921	1.76545	1.4597	9.71209	12.3656	19.2444	2.33063	3.56273	3.58019	7.82799
MINCR	3.39897	1.65702	1.30138	1.58713	0.813052	1.87607	1.07451	1.06059	1.77885	2.06786	1.60319	1.48661	1.00103	0.908543	1.10984	0.934922	1.61965	0.701205	1.19125	0.836662	2.16988	1.50606	2.15952	1.87629	1.76726	3.41009	1.1766	1.65735	1.06791	1.01431	0.657705	0.580914	1.5104	1.37879	1.28733	1.45333	1.01259	1.44417	1.68256	2.52664	1.30173	1.09157	3.09461	3.12803	6.24951	1.1035	4.01812	1.68918	5.21254
AC005332.5	0.750654	0.23694	1.39955	0.833446	0.732285	1.1073	1.05639	0.985898	0.855129	0.757028	1.72392	1.22826	1.14535	0.731916	1.58168	0.92441	0.83203	0.682911	1.2183	0.548154	1.23244	0.954208	0.212629	1.01597	0.884383	0.866482	1.00739	1.264	1.12408	1.89698	0.675741	0.725707	1.17562	0.848483	0.838452	0.803537	0.752151	1.32388	1.7215	1.68317	0.592881	0.766174	0.794868	1.19918	0.980968	0.491683	0.362928	0.958141	0.311792
PPP3CB-AS1	0.843654	0.763883	0.5649	0.775504	0.477388	0.931914	0.768928	0.698732	0.790244	0.798607	1.07074	0.973276	0.846846	0.604511	0.928715	0.747571	1.10039	0.63159	0.882908	0.431376	0.951349	0.934335	1.01813	0.826867	1.13293	0.901361	0.663359	0.875608	1.03463	0.708697	0.712452	0.622996	0.961147	0.805462	0.743987	0.85199	0.743734	0.670517	0.893722	1.34509	0.629936	0.336429	0.865727	0.807396	1.38957	0.408938	0.130905	0.817252	0.732096
NNT-AS1	2.21122	1.90769	1.16345	1.24763	0.680902	1.67054	1.64166	1.614	1.02101	2.18233	1.4012	1.4443	0.922993	1.05596	1.14286	1.10119	1.25366	2.13359	1.00578	0.717185	1.23009	1.95452	1.28727	1.81189	1.83148	2.44671	1.05003	0.857497	1.38604	1.89169	0.72019	0.831632	1.32913	0.870954	1.04552	1.62789	1.27099	1.1803	1.69456	1.32613	1.00579	1.21847	2.96379	1.29595	2.57249	1.03387	0.443129	1.27742	1.89822
LINC01534	0.666724	0.527265	0.285304	0.275783	0.195548	0.542098	0.297345	0.5404	0.423122	0.322796	0.738054	0.36708	0.168531	0.203947	0.419911	0.359936	0.214248	0.468934	0.391297	0.284439	0.433919	0.413205	0.511019	0.542606	0.489047	0.814872	0.27315	0.393501	0.620452	0.410906	0.499703	0.146702	0.508574	0.549695	0.58182	0.608243	0.625083	0.368898	0.32891	0.523263	0.364508	0.186806	0.842796	0.345844	0.47152	0.291945	0.163545	0.304135	0.220394
SNHG20	0.980514	0.754365	0.893323	0.603927	0.632819	1.01625	0.893238	0.910311	0.897165	0.792562	1.3285	1.0439	0.751789	0.711794	1.53258	0.742911	1.199	0.770176	0.428444	0.387935	1.21877	1.06321	1.32179	0.990196	1.44166	1.03267	0.842863	1.26959	0.787861	1.44972	0.904302	0.624667	1.31995	0.873696	1.04104	1.08223	0.665926	0.566607	1.02354	1.96855	0.864741	0.686671	5.18822	3.4712	3.58269	0.852427	0.557109	1.1021	2.381
AC084036.1	1.09821	0.755941	1.68191	1.59327	1.69382	1.54558	1.43468	2.65397	1.53463	1.0518	2.55519	2.46695	2.05547	1.68472	1.93084	1.30678	2.63972	1.65653	1.75314	1.71035	1.90183	1.38847	0.447951	3.50632	1.55904	1.47049	2.14164	1.41041	1.67948	2.67381	1.91233	0.839845	2.57394	1.66835	1.68484	1.29443	2.49781	1.92824	2.44311	1.93862	1.3733	0.747277	5.07661	0.516497	2.01653	1.05886	0	1.70328	2.96231
AC108449.2	0.687257	0.565244	1.23828	1.79543	0.833156	0.914388	1.03739	1.45688	1.49538	1.02846	1.62531	2.11265	1.42837	1.39276	1.04794	1.63761	1.10423	0.855203	1.11268	0.771575	1.67245	1.57594	0.412245	0.903512	1.66743	1.16662	1.56139	1.33043	1.78544	2.42035	1.28773	1.14255	1.98045	1.31603	1.17022	1.2853	1.18418	1.26753	2.60525	2.44794	0.99057	0.880271	1.85334	1.42598	2.65113	1.0891	0.112388	1.65708	1.54484
LINC00106	0.150781	0.202712	0.375248	0.530137	0.275661	0.426303	2.37428	1.11872	1.12322	0.22564	3.15996	1.44068	0.539944	0.686081	0.722227	0.501033	0.686415	0.416045	0.596564	0.316554	1.70451	1.23117	0.17084	0.762229	1.1932	1.17482	0.40574	0.907711	1.39148	1.20363	0.880529	0.752012	1.05005	1.22711	0.900201	1.0523	0.649511	0.265924	1.19797	1.93436	0.636993	0.230848	2.70018	2.99167	3.4608	1.06896	0.314382	2.58911	1.69466
AL137779.2	0.498117	0.642887	0.305147	0.589927	0.364266	0.500736	0.290504	0.263983	0.511812	0.44725	0.426088	0.427373	0.332966	0.323788	0.280697	0.725135	0.272114	0.274887	0.411296	0.228166	0.479231	0.367365	0.282191	0.583134	0.573354	0.804969	0.283847	0.719685	0.492519	0.347925	0.317334	0.372649	0.382776	0.360342	0.36047	0.270383	0.686626	0.585666	0.747544	0.357856	0.210435	0.237261	0.475745	0.146418	0.544429	0.282511	0.415434	0.496644	0.447873
AC008906.1	0.958614	0.8392	1.31448	1.07259	0.666933	0.78437	0.8321	0.590732	1.16822	0.834033	1.48744	1.11285	1.34118	0.811509	2.43716	1.03005	1.98916	0.451096	1.34989	1.08924	1.1582	1.26834	0.909327	0.972755	1.26165	1.20946	1.15744	0.948396	0.911102	0.978777	0.781129	1.50102	1.3705	0.826518	0.984109	1.10638	1.03714	0.961093	1.75155	2.65407	0.97948	0.712967	0.91556	1.7693	1.75436	0.237072	0.0619761	0.790309	0.651452
AL021707.8	0.121943	0.262307	0.186757	0.180524	0.243206	0.153231	0.711178	0.517003	0.751776	0.547454	1.77327	0.475566	0.349341	0.317065	0.824606	0.617459	0.888213	0.672946	0.503444	0.18619	3.05032	1.28477	0.138166	0.908449	1.28665	0.14076	0.231628	0.978807	0.803819	0.730071	1.03581	1.01364	1.0542	0.220537	0.441231	1.32384	0	0.286752	1.2918	2.50304	0.927295	0.497858	0.232933	0.358444	1.59937	1.21032	0	0.810553	0.822324
AC002128.1	0.0878568	0.0236231	0.201829	0.162578	0.131417	0.193197	0.33305	0.279365	0.496498	0.197213	0.732738	0.394027	0.167794	0.214159	0.44558	0.222431	0.439954	0.0808066	0.226698	0.100609	0.633943	0.347116	0.0746585	0.303881	0.758452	0.278887	0.111254	0.176301	0.275087	0.635579	0.303174	0.07303	0.40086	0.278059	0.158947	0.408768	0.132459	0.120515	0.484744	1.64558	0.241255	0.358693	0.545421	0.581059	0.672177	0.249144	0.183183	0.656979	0.691206
AL390728.6	2.93721	2.56192	2.42746	2.01503	1.86933	4.16343	3.44687	2.0122	2.96276	3.35019	3.73809	2.24905	2.20623	1.7812	3.45163	2.28982	5.60943	0.807158	1.70064	1.28525	3.85969	1.94355	3.22649	4.17426	3.93402	3.55582	1.96177	2.86077	2.57364	3.35973	3.49899	1.92047	3.19984	2.05678	1.78858	2.22209	2.34533	1.96538	4.31629	3.71297	1.6797	1.25523	9.69879	4.73801	10.5705	2.01884	0.199159	4.56342	1.48956
AL391834.1	0.478192	0.942901	0.701838	0.737408	0.503349	0.650957	1.4409	1.18264	0.450395	0.954134	1.3294	0.870286	0.570798	0.518061	0.763497	0.60533	1.88666	0.47647	0.548394	0.152111	0.690092	0.419845	0.0903012	1.22988	0.573354	1.10396	0.555079	0.607734	0.656692	1.55075	0.676978	0.23187	0.80383	0.43241	0.288376	1.01973	0.720958	0.655946	0.949821	0.899753	0.774401	0.84058	2.85447	0.351403	3.91989	0.480269	0.332347	0.706339	1.43319
AL442125.2	0.106773	0.114838	0.163524	0.11855	0.106475	0.134169	0.124541	0.226344	0	0.239675	0.274001	0.333124	0.152941	0.104108	0.300843	0.202742	0.583288	0.294615	0.183673	0.122271	0.256813	0.281236	0	0.170451	0.409669	0.184873	0.236615	0.0857042	0.246338	0.532708	0	0.0887542	0.205124	0	0.115902	0.372585	0.0919882	0.292926	0.235646	0.164374	0.0451076	0	0.713845	0.156926	0.466803	0.189242	0	0.768862	0.960034
AC138956.2	0.676231	0.0909133	0.194184	0.218988	0.224781	0.531084	0.443678	0.268783	0.434265	0.316238	0.97613	1.25268	0.403595	0.329675	0.714502	0.37451	0.846578	0.583093	0.290815	0.129063	0.447282	0.712465	0.191548	0.26988	0.527022	1.17086	0.32112	0.983812	0.612912	0.927799	0.897509	0.210791	0.48717	0.382181	0.489366	0.688248	0.254884	0.165643	0.820833	2.29896	0.357102	0.25883	1.41282	0.124233	0.831492	0.35956	0.117496	1.17054	0.950034
ITCH-IT1	0	0	0	0	0	0.134814	0	0	0	0	0.0917729	0	0	0.069739	0	0.0679056	0	0.0986772	0	0	0	0	0	0.11418	0.10291	0	0.0679293	0	0.0707206	0	0.113915	0	0	0.0970151	0	0	0	0	0	0	0	0.0730033	0.102468	0	0	0	0	0	0.723487
AL355001.2	4.55307	3.26464	2.9413	1.56719	1.61933	3.57873	1.87952	1.5292	3.50387	2.35529	2.0996	2.41137	3.38166	1.82692	2.344	1.94492	1.94478	1.67163	2.91372	2.74642	2.1091	1.77668	4.88278	1.55538	3.12721	3.02793	2.37268	2.19578	2.91481	1.43961	2.26796	1.51076	2.96965	2.30425	2.73897	1.482	2.58277	5.33128	2.89462	3.67291	1.80476	1.4152	4.50963	4.73651	2.66226	1.23536	4.32339	2.65693	2.27434
AC006449.2	0.688754	0.79016	0.281288	0.373863	0.152629	0.173094	0.160674	0.146006	0.235897	0.137427	0.43205	0.573028	0.394626	0.179083	0.25875	0.261562	0.0836126	0.295626	0.315947	0.210326	0.530112	0.628904	0.260127	0.34207	0.616611	1.00704	0.348871	0.405419	0.33294	0.687259	0.195014	0.229008	0.617482	0.49825	0.166143	0.249242	0.395587	0.46789	0.445885	0.471251	0.193981	0.281198	0.570111	0.134969	0.903349	0.325527	0.510601	0.559548	0.309641
TRIM31-AS1	2.23563	1.26782	1.77419	1.47428	1.75649	2.19631	1.46977	0.990923	2.00474	0.486626	1.25172	0.824315	0.815129	0.792662	1.00785	1.10628	1.92446	0.0373859	0.503444	1.05508	2.46372	1.11347	0.506608	0.994968	1.52059	0.656878	1.10667	1.30508	1.20573	1.9063	3.45271	1.45288	1.09325	1.7643	1.23545	1.70208	1.36575	1.01956	1.22004	2.46132	1.51115	1.13401	4.5422	1.19481	5.68666	0.662795	2.26004	0.765522	1.00506
FGD5-AS1	41.2998	40.8828	37.2437	38.441	33.187	38.9932	31.8883	32.7112	28.5285	36.7856	26.1275	35.1846	33.5491	39.8306	33.7774	30.7262	36.9293	29.8773	42.869	26.622	30.1352	29.7523	45.2516	35.7283	37.554	53.1998	45.6428	34.5885	39.8523	29.571	26.8667	27.8696	33.6718	27.1166	31.8669	35.9479	36.5701	29.9691	38.133	33.8476	28.6665	29.3484	28.4622	14.9957	32.809	24.3707	11.8732	22.9343	20.706
AC004241.3	0.431637	0.417814	0.462737	0.351446	0.200868	0.379669	0.302079	0.411753	0.665257	0.322966	0.627677	0.404001	0.288527	0.392805	0.632411	0.327838	0.707392	0.1191	0.356403	0.296571	0.789016	0.227382	0.978117	0.505308	0.828054	0.398592	0.382611	0.277171	0.312976	0.73219	0.366642	0.466432	0.207306	0.31225	0.249889	0.535536	0.297494	0.372168	0.304835	0.531593	0.69293	0.469932	0.865727	0.38063	2.54755	0.336609	0.239992	0.430361	0.485124
AL031716.1	0.08421	0.135855	0.451387	0.15583	0.111966	0.26454	0.245558	0.312397	0.259576	0.189027	0.576265	0.295569	0.522693	0.273693	0.427084	0.239848	0.61337	0.348535	0.289718	0.225009	0.810171	0.354888	0.286238	0.179241	0.726969	0.0972038	0.26659	0.371762	0.277545	0.378122	0.312943	0.174996	0.404443	0.0380738	0.274229	0.3918	0.435295	0.132014	0.371698	0.432128	0.320179	0.487056	1.60856	0.495058	0.552236	0.119401	0.936424	0.37316	0.946449
AC067838.1	0.541454	0.291175	1.45117	1.43136	0.719923	0.923368	1.17289	1.02482	1.43059	0.983899	1.68722	1.44796	0.812505	0.930176	0.871767	1.32187	2.46491	1.06715	1.43704	1.06293	1.52557	1.05944	0.131461	1.93453	1.4839	0.937503	1.07745	1.39696	1.12173	1.11915	1.02661	0.771562	0.965896	0.944258	1.37141	0.659791	1.23283	1.36419	1.7071	1.27017	0.718908	1.1053	2.40099	0.454732	2.62081	0.959657	1.07518	2.18512	2.26032
AC009118.3	0.690174	0.742302	0.528502	0.454101	0.254906	0.513929	0.954103	1.16503	0.630355	0.650298	0.787166	0.976953	0.561427	0.332319	0.518567	0.420657	0.930945	0.987451	0.703553	0.234177	1.00831	0.781018	0.376514	0.92495	0.760093	1.53433	0.388434	0.923308	0.488645	0.994754	0.407118	0.403715	0.761167	0.577868	0.554951	0.852342	0.616626	0.581059	0.519015	1.18056	0.388763	0.33048	1.02539	0.901652	2.12334	0.471176	0.213189	0.764594	1.32156
AC098484.1	2.67419	2.2811	1.51817	2.11593	1.80847	2.31746	1.66715	2.15026	1.61073	2.34591	1.53814	1.906	1.62905	1.46855	1.97463	1.57586	1.17541	2.62922	1.84007	1.16157	1.68562	1.99166	2.76874	1.76649	2.12283	2.0224	2.04349	1.77641	1.85393	1.47221	1.66447	1.30307	2.30298	1.6677	1.90185	1.60889	1.90666	1.37333	1.26178	2.17671	1.792	0.941199	1.32108	1.4908	1.20944	0.915243	0.384533	1.94097	1.34732
CEBPA-DT	3.40116	1.7362	4.48585	4.29106	2.74708	3.50834	3.63555	2.29211	3.48423	2.11186	4.20335	3.73772	3.58718	3.68253	2.12829	3.70138	4.04878	0.803066	3.17859	2.6818	3.99501	2.72766	2.72629	2.51757	4.56735	4.26582	4.66048	4.43322	4.14929	3.46468	2.88902	2.86093	4.7591	4.35164	4.2687	2.35398	3.68242	3.42198	5.91537	3.31351	2.3676	3.24004	3.42294	4.92411	4.12795	0.359887	2.14508	0.618609	1.55187
AC018752.1	0.64997	0.23302	0.912478	0.641474	0.144035	0.54449	0.379065	0.68892	0.33392	0.810551	0.555983	0.67595	0.413782	0.844993	0.854628	0.27426	0.591783	0.896717	0.521773	0	0.521105	0.456531	0	0.345866	0.727361	0.125044	0.274355	0.260857	0.357036	0.864745	0.230041	0.180093	0.416222	0.097957	0.705542	0.588018	0.653295	0.339648	0.286893	0.667072	0.549174	0.36856	0.206926	0.318423	0	0.230398	0	0.360027	0.243504
AC115618.1	0.772308	0.699486	0.529144	0.481397	0.459389	0.561846	0.474119	0.301585	0.793542	0.669111	0.834481	0.602384	0.543419	0.449175	0.64136	0.540276	0.296071	0.299087	0.167815	0.341348	0.899452	0.642387	1.19744	0.302816	0.974736	1.03224	0.463255	0.456777	0.777025	0.689512	0.38843	0.236516	0.468535	0.47783	0.470647	0.788002	0.595326	0.509782	1.0765	1.33495	0.583852	0.719129	1.31995	1.31429	1.59937	0.835698	1.01702	1.08074	2.1015
MIR17HG	0.063905	0.13059	0.176167	0.122986	0.0594782	0.056211	0.193802	0.0406407	0.236383	0.095632	0.349851	0.184425	0.109844	0.0830797	0.259283	0.0849403	0.442199	0.0470215	0.0571637	0.0683016	0.178298	0.242385	0.0651658	0.163226	0.232932	0.140155	0.105201	0.241086	0.117949	0.267818	0.169632	0.116865	0.147323	0.104016	0.0878672	0.193263	0.104606	0.075137	0.208734	0.419754	0.226778	0.304389	2.08129	2.08507	2.36082	0.144977	0.230955	0.516809	0.818792
AF131215.5	1.66878	0.569392	1.31312	0.77521	0.856927	1.40278	1.11419	1.31744	1.65554	1.37781	1.28965	1.60682	1.27485	0.471305	1.12846	1.10722	1.00594	1.0797	1.10075	0.509598	1.79374	1.38231	0.612874	1.10235	2.90334	2.59051	0.743263	1.27482	0.82691	1.81445	0.745409	0.803594	2.27731	0.55157	0.449742	1.43684	0.971688	1.10057	1.04647	1.9253	0.95296	0.274092	1.64879	0.879564	0.301893	0.522187	0	0.548241	0.465659
JPX	2.39942	2.79209	2.15002	2.5372	1.70909	3.58512	1.82269	1.5334	1.83351	3.2663	3.14337	2.95665	2.17575	2.05446	1.75548	1.3432	2.20298	1.78497	2.60831	1.61628	2.76432	3.42553	2.46161	2.17806	2.16131	3.625	2.24051	1.51325	1.68132	1.92141	2.20511	1.81013	2.90035	2.04663	2.49149	2.23978	2.34076	1.45404	1.93128	2.13663	1.5716	2.56565	5.67137	3.28939	3.96682	1.41517	2.32625	3.4567	3.04801
AC004908.2	0.311019	0.585393	0.148852	0.316546	0.310151	0.537376	0.362775	0.453279	0.279624	0.639968	0.665114	0.363883	0.594001	0.176899	0.131449	0.147642	0.920322	0.250303	0.133755	0.267121	0.299227	0.491526	0.264296	0.372378	1.19332	0.403887	0.295386	0.312059	0.435659	0.543102	0.371513	0.45243	0.298752	0.210932	0.337611	0.633092	0.16747	0.152368	0.480488	0.758107	0.394181	0.105817	1.74517	0	4.07924	0.826862	0	0.387625	0.524339
DNMBP-AS1	1.45205	0.750035	1.53618	1.89504	1.68932	1.92063	0.779983	0.830282	1.88459	1.88703	1.76506	2.10866	1.57817	1.76354	1.08741	1.62043	1.77433	0.175727	2.24804	2.02745	2.15063	1.20778	1.62357	1.06751	1.86013	2.09512	2.60085	1.8863	1.99616	1.14386	1.65332	1.98519	2.18392	2.7038	2.0532	1.20746	2.22213	1.77465	1.76254	2.20596	0.669933	1.20255	7.39034	1.85329	1.60793	0.379262	0.424918	0.666728	0.558308
AC012467.2	1.10585	0.845568	1.3959	1.42606	1.01086	1.38958	1.4511	1.20874	1.12737	1.08601	1.76625	1.52965	1.1385	1.49943	1.28527	1.23581	1.54174	1.33495	0.725248	0.857425	1.54601	1.30164	0.675423	1.47112	1.29277	1.20667	1.25266	1.52562	1.24718	1.89655	0.935661	0.775594	1.38588	0.99216	1.29418	1.20589	1.17601	1.09028	2.03635	1.72902	0.963553	0.958228	2.60744	1.37133	3.68264	1.29235	0.528392	1.45479	1.76722
AC100830.2	0.371927	0	0.213603	0.206474	0.12363	0.116838	0.216909	0.591323	0.0955383	0.556578	0.477219	0.362619	0.355163	0.483524	0.83835	0.235406	0.169316	0.769682	0.191938	0.28394	0.268369	0.48982	0.210703	0.692693	0.445942	1.07329	0.412104	0.37317	0.306456	0.556679	0.49363	0.386451	0.893144	0.420399	0.336439	0.504715	0.160213	0.364414	0.164167	0.858855	0.0785625	0.0632695	0.532835	0	0.813014	0.263677	0	0.412031	0.418015
AC009120.2	0.460256	0.393103	0.684151	0.771539	0.512967	0.833498	1.01843	0.660014	0.86932	0.506441	1.25637	1.07697	0.568778	0.435567	1.16713	0.629749	1.07228	0.715911	0.605446	0.470218	1.2633	1.16951	0.475471	0.922029	0.86348	1.04692	0.565686	1.01051	0.945859	1.24269	0.898326	0.365704	1.2873	0.789539	0.489811	0.797782	0.489822	0.583594	1.1054	1.75053	0.417475	0.354632	1.68723	1.41257	3.77286	0.666991	0.150532	0.974778	1.6888
AL357033.3	2.32606	1.1336	1.58637	1.74864	1.42557	2.10081	1.39896	0.847498	3.09955	1.25094	1.77208	3.08994	3.43594	1.89	2.4577	2.78347	1.456	0.334281	2.4258	2.41395	2.55257	1.07218	2.6355	1.31512	3.31188	2.55912	1.95601	2.1588	2.53949	1.70449	2.66271	2.59816	2.89763	2.76066	2.39343	1.0146	2.16052	2.25059	1.82883	2.72297	1.0748	1.16235	3.57537	0.320497	0.635581	0.695696	1.31351	0.523427	0.898664
AC007342.5	0.625088	0.56025	0.550461	0.663185	0.152373	1.02111	1.0086	0.695674	0.524524	0.37417	0.499053	0.35754	0.586965	0.277654	0.986294	0.349482	0.720896	0.0574926	0.501799	0.421535	0.611411	0.537841	0.247886	0.288275	0.299793	0.61331	0.461742	0.610452	0.52192	0.71729	0.232296	0.632177	0.54039	0.320304	0.79916	0.807867	0.691114	0.21232	0.625397	0.748458	0.475336	1.0988	0	0.428727	3.0061	0.192034	0.608216	0.992568	0.140509
OIP5-AS1	7.81127	7.32363	8.71873	8.48511	6.12714	8.34621	8.79687	7.18938	7.6696	7.21756	9.13845	10.18	7.23218	8.32594	7.5771	9.15024	9.59059	7.6201	7.30252	5.70657	8.46719	7.02947	8.3237	7.94397	8.87591	9.11413	7.35285	7.49956	9.97761	9.63394	6.74201	6.74186	8.25248	7.34366	7.6572	7.55238	7.95994	6.20974	10.9855	9.97762	5.38438	5.14623	4.78302	4.73602	6.4628	5.65888	2.62877	9.43188	7.57196
AC127024.4	0.289814	0.155851	0.166444	0.375408	0.289004	0.273129	0.845102	0.537566	0.148891	0	1.48744	0.452097	0.0691877	0.376772	1.06155	0.137575	0.659671	0.599753	0.199416	0.0553129	0.418238	0.229007	0.164184	0.616869	0.555979	0.334533	0.229372	0.232626	0.334316	1.08444	0.461576	0.240904	0.139191	0.3931	0.26216	0.561835	0.187262	0.0567919	0.831493	1.04104	0.0612175	0.0986018	1.03799	1.4908	1.58379	0.410925	0.201422	0.963189	1.46577
AC109322.1	0.988668	0.588635	0.838188	0.352836	0.551639	0.68772	0.61778	0.505244	0.689327	0.343458	0.875908	0.839991	0.792374	0.654134	0.776004	0.491671	0.450079	0.340999	0.437327	0.646951	0.730372	0.725429	1.04018	0.450939	0.643511	0.570611	0.458308	0.708551	0.651704	0.704658	0.581109	0.454935	0.695296	0.526829	0.383285	0.533921	0.288991	0.691926	0.576661	1.21399	0.626511	0.744818	0.522717	0.518949	1.0034	0.425555	1.91415	0.919246	1.19055
AC020978.3	0.0970245	0.0521763	0	0.143634	0.225758	0.0609592	0.22634	0.154258	0.24923	0.145194	0.373476	0.340547	0.231628	0.126137	0.2187	0.0307052	0.0883386	0.223096	0.100142	0.222214	0.140019	0.0511116	0.109932	0.0516293	0.0930661	0	0	0.077879	0.15989	0.484069	0.103018	0	0.139796	0.131603	0.0351067	0.075237	0.0417946	0.0760517	0.299782	0.348521	0	0.231071	0.370667	0.285196	1.80277	0.103178	0	0.214973	0.218095
AL606834.1	0.367473	0.323368	0.153487	0.272002	0.310925	0.377801	0.194829	0.49572	0.240276	0.399937	0.400064	0.364791	0.191405	0.434303	0.941261	0.465174	0.669152	0.36871	0.298826	0.204028	0.3214	0.492753	0.378508	0.604402	0.192262	0.385614	0.211516	0.536292	0.220208	0.333341	0.354704	0.277689	0.192534	0.120833	0.410979	0.751244	0.316588	0.366597	0.383383	0.514285	0.338712	0.454631	0.223344	0.294589	0.657227	0.781558	0.464357	1.14727	0.30037
AL117336.1	0.199842	0.0716451	0.357067	0.147922	0.132856	0.16741	0.776989	0.423634	0.342227	0.199371	0.227926	0.311744	0.0636113	0.173203	0.750761	0.337298	1.33431	0.306341	0.320852	0.152564	1.0895	0.701831	0.452854	0.992515	0.319481	0.0768925	0.126531	0.320815	0.219551	0.199408	0.495104	0.332232	0.191959	0.240945	0.144619	0.671519	0.114779	0.104429	0.470448	1.0255	0.450268	0.0453274	0.31811	0.587419	2.18422	0.802838	0	0.295186	0.598947
AC025165.5	0.772167	0.74744	0.975625	0.857333	0.667343	0.6792	1.98146	1.3095	1.26944	0.751092	1.288	1.02387	1.17978	0.702699	1.21836	0.781972	1.54669	1.63347	0.50475	0.50107	0.742891	1.30167	0.612423	1.56138	0.925831	0.891315	1.17337	1.14663	1.01799	1.23278	1.14782	1.05906	1.48342	0.977536	1.17346	1.25742	0.598719	0.726307	1.3974	1.66422	1.04388	0.97203	1.32748	0.794405	1.18154	1.1496	0.107332	0.983742	0.954636
DLEU1	0.951245	0.686788	0.569752	0.54516	0.286768	0.81423	0.558065	0.33941	0.495473	0.608868	0.576836	0.524508	0.377738	0.440792	0.367269	0.404166	0.545377	0.237352	0.325324	0.261722	0.538234	0.341348	1.20371	0.499166	0.635995	0.880594	0.552196	0.508018	0.59972	0.515	0.336003	0.433717	0.622419	0.5655	0.520718	0.479099	0.527416	0.476904	0.588655	0.543234	0.542716	0.528074	1.69291	0.791771	0.877042	0.384599	0.785491	0.617681	1.11781
AL391863.2	0	0	0.0250928	0	0	0	0	0	0	0	0.0840915	0	0	0	0.147727	0	0	0	0.0225478	0.0250167	0	0	0	0.0697488	0	0	0.0207479	0.0263027	0	0	0.0347933	0	0	0	0	0	0	0	0.0578561	0	0	0.0222976	0.0312972	0	0	0	0	0.0726046	0.073659
AC114488.1	1.73692	1.17772	5.26236	4.69545	2.73617	6.07323	3.69957	1.80098	2.09505	0.960592	2.51933	3.50471	2.16343	2.01264	1.65968	2.31821	4.67552	0.451478	1.48094	5.44818	5.12217	1.59129	4.62049	1.80833	3.36833	1.91776	2.8928	3.6673	3.13612	2.48669	5.53267	1.72628	3.55444	3.07296	3.25167	1.96176	4.09884	2.10139	2.9	3.64275	0.701878	1.72144	23.9099	8.9902	4.78729	0.508616	0.734799	29.6579	1.35802
AC092868.3	0	0.048292	0.0343828	0.0332353	0	0	0.0523725	0.142774	0.0922704	0.0671926	0	0.0350216	0	0.0583731	0.101209	0.0568385	0	0.0412975	0.0308955	0	0.0431983	0	0	0.0955713	0.0430688	0	0.0284292	0	0	0	0.238373	0	0	0.0812038	0.0649862	0.0348179	0	0	0.158551	0.0921642	0.0379376	0	0	0.131982	0.392603	0	0	0.0497422	0.302787
AC245140.2	0.563933	0.284696	0.872478	0.528165	0.344301	0.491698	0.496688	0.353757	0.425709	0.32723	0.610368	0.691202	0.659406	0.351608	0.60963	0.407924	0.628712	0.137609	0.728553	0.281157	0.664349	0.400142	0.325997	0.257214	0.529886	0.597811	0.408066	0.748265	0.59932	0.59716	0.476573	0.363531	0.674349	0.541163	0.45807	0.348054	0.505674	0.378886	0.78231	1.06305	0.388963	0.603002	1.35201	0.744246	1.08178	0.399799	0.0639897	0.905236	1.37111
AP001625.2	0.349288	0.709598	1.09959	0.344722	0.0516019	0.243837	0.407413	0.575897	0.638029	0.348466	2.62263	0.665958	0.370605	0.252273	0.56862	0.122821	0.565367	0.0356954	0.694315	0.296285	1.19483	0.449782	0.4837	0.619551	0.967888	0.358386	0.63889	0.373819	0.460484	1.43284	0.988977	0.580684	0.857418	0.912448	0.449365	0.722275	0.300921	0.517152	1.19913	3.90343	0.524661	0.290489	0.963736	0.684471	1.18771	0.302656	0.215785	0.816896	0.348952
AP001453.4	0.863325	0.365785	0.701158	0.755217	0.608727	0.788968	1.00699	0.665498	0.8333	0.704695	1.00703	0.714185	0.674519	0.663216	1.09094	0.629221	0.381109	0.48124	0.792054	0.499308	1.35915	0.606389	0.652116	0.36195	0.752821	1.08713	0.629441	0.797963	0.362143	0.757032	0.583328	0.608897	0.879532	1.51403	0.643691	0.770893	0.608546	0.492152	0.877608	0.88604	0.773651	0.907876	1.32428	0.922792	1.08656	0.797523	2.10915	1.42013	0.999707
SOS1-IT1	0.355911	0.382793	0.504198	0.513716	0.366748	0.514313	0.539679	0.660169	0.548545	0.292936	0.837226	0.569087	0.475817	0.497405	0.621743	0.428011	0.550883	0.360085	0.391835	0.339641	0.376659	0.637469	0.383096	0.606047	0.802268	0.390288	0.47323	0.657065	0.434024	1.18971	0.566848	0.488148	0.495716	0.370112	0.360585	0.620975	0.567261	0.265029	0.706937	0.456595	0.345825	0.617559	0.713845	1.2031	1.08921	0.416332	0.197889	0.946291	0.480017
PRR26	1.35627	1.21472	1.30467	1.37724	0.829456	1.13111	1.48907	1.58078	1.26461	1.7407	1.78977	1.60373	1.173	1.20633	2.07525	1.22655	1.3491	2.27955	2.01922	1.461	2.0571	1.79253	1.35349	1.77216	1.72455	1.82739	1.37519	2.47365	1.58282	1.06917	1.79366	0.994984	1.57167	1.59522	1.33775	1.91066	1.51983	1.4225	1.22712	1.83282	1.17856	0.564889	1.03029	0.446901	1.24497	0.159113	0.53672	1.0186	0.965589
AL513550.1	0.558572	1.37735	0.959778	0.615137	0.208314	0.462218	0.667414	0.779766	0.40595	0.815499	0.640954	0.478179	0.650482	0.327663	0.214961	0.707081	0.496163	0.964844	0.824935	0.197614	0.734001	1.09088	0.463083	0.492968	1.69883	0.597584	0.543434	0.918573	0.942942	0.747677	0.303772	0.634175	1.3479	1.08411	0.40422	0.570479	0.598597	0.63005	0.469047	1.0207	0.529505	0.268837	1.37925	1.52174	1.42948	0.618144	0.0757485	1.13195	0.673724
AL022328.2	0.592759	0.450021	0.827711	0.671041	0.533153	1.05155	1.42347	1.10873	0.967325	0.782688	1.99836	1.25104	0.832414	0.430638	1.53261	0.573802	1.39685	0.609332	0.983682	0.266193	2.38178	1.5062	0.158027	0.705062	1.27093	1.3282	0.838927	1.39939	0.643558	1.844	1.14769	0.60866	1.60766	0.567538	0.60559	1.37895	0.600798	0.546622	1.72375	4.15113	1.00167	0.925316	1.5319	1.53739	0.762201	1.01351	0.0969345	1.27472	1.56756
AC079414.3	0.491353	0.374329	0.501673	0.424314	0.476371	0.848955	1.05072	0.455698	0.631078	0.275736	0.963195	0.670679	0.72336	0.306084	1.17677	0.375786	0.671049	0.640225	0.436703	0.312594	0.709086	0.690241	0.394343	0.893328	0.667685	0.77986	0.699983	0.72306	0.580299	0.755858	0.49997	0.374396	0.668629	0.333233	0.533364	0.301638	0.493867	0.545619	0.614495	1.00856	0.27677	0.710476	1.07545	0.180537	2.28241	0.740232	0.113831	0.975266	1.51866
AC145098.1	0.565604	0.663625	0.393738	0.799255	0.752033	0.323056	0.779674	0.326999	2.85294	0.61557	0.175933	0.681791	1.03112	1.27009	0.637455	1.69232	0.280892	0.189169	0.318422	0.54956	0.840973	0.758431	0.174777	0.711389	3.15653	0.356115	0.813899	1.32071	0.576194	0.461762	0.272975	0.769339	2.22257	0.511453	0.558147	0.239233	0.221492	0.523951	0.5447	1.21374	1.39023	0.559804	0.343764	0.906845	0.561991	1.49458	0.28589	0.740517	1.61812
ALG13-AS1	0.343317	0.246165	0.0876319	0.169415	0.228239	0.143801	0.400448	1.21297	0.352757	0.171255	0.391564	0.17852	0.437124	0.148777	0.128977	0.724326	0.416777	0.210511	0.236231	0	0.550501	0.241142	0.129663	0.365376	0.878162	0.396292	0.362289	0.367429	0.150871	0.456763	0.972071	0.0951263	0.109925	0.310448	0.248447	0.266223	0	0	1.01026	0.704702	0	0.23361	1.42089	0.672771	0.500317	0.324526	0.318144	1.01423	0
ANKRD10-IT1	3.51471	3.24015	2.47779	2.99388	2.41078	5.04742	4.81539	4.99668	3.35339	2.62983	8.73311	5.24347	3.40957	2.88301	6.79063	2.77191	7.00967	3.1557	2.1689	1.63975	5.44789	4.79044	1.51706	3.47336	5.29779	5.73138	3.05546	4.47804	4.19232	9.01821	5.03503	2.20277	5.30528	3.25389	3.53261	4.32613	3.12415	1.92411	8.22475	8.81758	1.74409	1.82216	52.8306	19.0226	39.0247	4.66709	0	10.6304	7.08535
AC091982.3	2.01315	1.59326	1.26526	0.506082	0.88382	2.10011	1.3513	1.38898	1.15134	1.25052	0.698568	1.28876	0.870528	1.11108	1.60535	1.25016	1.00293	1.57212	1.48977	1.07293	1.24249	1.38067	1.91515	0.990403	1.12947	1.11805	1.14237	1.61591	1.06412	1.13705	1.06876	0.86828	1.42295	1.92346	1.27818	0.898362	1.60349	1.6822	1.49217	1.32544	1.2356	1.09847	2.06785	1.84225	2.40791	0.754005	0.263992	0.589117	1.28073
MUC20-OT1	1.06513	0.495051	1.23411	1.08593	0.939076	0.995839	2.0573	0.530877	1.40579	0.388994	2.4166	2.33507	0.859706	0.82506	1.49054	1.11236	1.30919	0.562133	1.0374	0.989328	2.36544	0.603849	1.12637	0.820483	1.99104	2.63752	0.82934	1.24883	1.35907	1.96494	2.16492	0.499604	1.22043	1.32204	1.04241	1.41295	0.888139	0.521805	1.23916	2.50904	0.385692	0.678172	2.61709	1.45361	3.00186	0.688596	0.363084	1.52554	1.33392
AC009054.2	0.23867	0.128348	0.411214	1.14831	0.119002	0.299906	1.04395	0.82216	0.429156	0.267872	1.37807	0.372315	0.341869	0.620565	1.07596	0.415423	0.325955	0.164638	0.410563	0.182207	0.229621	0.188594	1.3521	0.381007	0.286166	0	0.415567	0.431042	0.904619	0.952607	0.443475	0.297588	0.458512	0.809324	0.0431793	1.11045	0.10281	0.327388	0.0526738	0.4899	0.403315	0.121802	0.797827	0	1.56516	0.296108	0.995263	0.264405	0.402367
AL162274.2	0.941021	0.650633	1.08088	0.497528	0.223427	0.506769	0.470406	1.56736	1.10502	0.804692	0.747452	0.83883	0.256745	0.611687	0.68179	0.510519	0.734381	0.927328	1.06375	0.615772	0.71134	0.920625	0.456946	1.43069	0.451315	0.775874	0.723488	0.863237	1.06337	0.737768	0.642314	0.558724	1.03303	0.668586	0.437776	0.469098	0.579082	0.684924	0.771385	1.10375	0.454337	0.594581	1.66912	1.97576	0.734652	0.619483	0.747447	0.446781	1.81308
AC091057.1	0.332888	0.216909	0.703326	0.489207	0.19546	0.430511	0.385449	0.224064	0.561745	0.283622	1.00598	0.513605	0.710017	0.303255	0.416254	0.2676	0.46901	0.248068	0.305964	0.157675	0.897681	0.801291	0.423975	0.462887	0.771464	0.384253	0.369232	0.442733	0.589421	0.737067	0.397312	0.601893	0.67686	0.287834	0.411463	0.657587	0.270045	0.333306	0.915929	0.798007	0.44756	0.66466	0.965415	0.578529	0.451478	0.506453	0.195896	0.77525	1.54025
AC080112.2	5.2219	3.65633	3.81915	5.11157	3.49989	4.86102	4.82297	4.08899	5.50782	3.95506	5.74304	5.82684	6.14667	5.39635	7.63883	5.67943	4.77383	1.6761	2.44918	5.01166	5.57757	4.07575	6.66521	3.91288	4.91686	4.48999	5.47898	6.11614	6.41363	3.44535	4.85426	3.75599	5.6199	7.1793	6.42415	3.42124	6.11471	5.45473	5.94575	5.50149	3.68276	3.21242	1.598	1.56627	2.28296	5.34154	2.37013	2.63275	3.95258
MIR4435-2HG	0.483068	1.41748	0.450325	0.507198	0.55677	0.712577	0.431777	0.350619	1.1006	0.660036	0.357072	0.524219	1.18583	0.709927	0.639118	0.446995	0.693198	0.284933	0.272778	0.90393	0.303099	0.638956	2.1685	0.455431	0.428104	0.306078	0.658259	0.655375	0.501867	0.413908	0.755428	0.6045	0.49932	0.636236	1.14183	0.403093	0.527006	0.450673	0.410223	0.433806	0.982678	1.18798	2.37456	3.0714	2.5653	3.5978	1.5692	1.42223	1.94746
AC113143.1	0	0	0	0.0548769	0.0492876	0.0931603	0	0.0785811	0	0.110946	0.0634178	0	0.21239	0.0481918	0.250669	0.0469248	0	0	0.0510134	0.169798	0.142655	0.0781108	0	0	0	0	0	0.119018	0.0488701	0.295909	0.0787184	0	0.142428	0	0.0536514	0.0574901	0.127744	0.174338	0	0	0	0	0.0708086	0	0	0	0	0.32853	0
ASMTL-AS1	0.234022	0.305632	0.460806	0.655768	0.5223	0.357079	1.89125	0.797289	1.33968	0.350207	3.13142	1.00393	0.622533	0.478091	0.734733	0.539583	0.97404	0.491982	0.575095	0.497692	2.04242	1.3737	0.132577	0.764964	0.929964	0.7911	0.465685	1.24781	1.15696	1.13421	0.993916	0.514109	1.07579	1.0732	0.665317	0.959202	0.547244	0.366871	0.826367	2.35033	0.579067	0.443597	3.30477	3.43945	2.77704	0.580682	0.650586	1.68516	1.766
MRPL20-AS1	5.78881	5.86483	5.39379	5.29228	5.13516	6.71879	4.66978	4.5245	7.50079	4.8538	6.58468	5.51468	6.74318	5.67016	4.74124	6.29863	5.29472	3.9993	3.53318	4.45982	6.01997	6.89977	6.42873	4.87217	7.95172	7.0799	4.47101	7.48409	6.12864	6.44646	4.74823	5.03962	6.29056	5.33049	6.1974	4.811	5.65726	6.13775	5.61742	6.31301	6.25015	4.9914	7.65594	8.28707	4.25021	4.76812	8.37821	5.85492	6.51607
AL049555.1	7.29616	3.34004	8.02696	13.6211	8.2505	10.6914	9.82994	5.26164	10.4504	5.64928	9.43082	11.4898	10.4069	10.1683	6.97396	10.5074	16.4183	0.881306	7.26842	8.8575	8.00804	4.30575	7.84821	9.09188	6.66629	10.5674	13.0986	8.85879	13.2031	8.1558	8.9359	13.905	11.5328	12.0678	15.9987	5.00425	12.3131	6.85921	9.23342	8.35307	6.84749	7.1485	8.82085	6.48147	13.0722	4.59969	4.65366	7.18763	7.55152
AL353804.1	0.692725	0.904698	0.682014	0.659253	0.427632	0.559581	0.750285	1.04891	0.305045	1.70306	1.31209	1.08062	0.897752	1.09356	0	0.313179	0.450507	0.773665	1.0214	0.642169	0.856877	1.40755	0.840942	1.31649	0.427155	0.399807	0.595247	0.317732	0.68494	0.987458	1.10328	0.45243	0.807988	0.536917	1.0026	1.03597	1.02309	0.814478	0.262084	0.812516	0.334457	0.875392	0.803387	1.45444	0.757131	0.210474	0	0.986682	0.889788
AL158166.1	0.42105	0.323465	0.506659	0.934978	0.9997	1.88957	0.912072	0.765054	0.679841	0.630089	0.565974	0.469157	0.919021	1.01657	0.406746	0.456853	1.31436	0	0.579435	1.88273	0.810171	0.887221	0.681518	0.448103	0.923136	1.1109	0.304675	0.917335	0.753337	0.480155	0.894122	0.949981	1.32888	0.815868	0.696456	0.606358	0.777313	0.660071	0.690296	0.987722	0.609865	1.5553	0.861727	0.176806	0.657424	0.810221	1.67219	0.133271	1.21686
RGMB-AS1	0.866349	0.819151	0.860244	0.732878	0.354433	0.885261	0.53302	0.766903	0.596707	0.4559	1.14826	1.1287	0.690932	0.507453	0.429189	0.488086	0.658771	0.218909	0.386496	0.254383	1.4655	0.892709	0.506981	0.526865	1.21454	1.36268	0.747454	0.817663	1.35552	2.16592	0.606508	0.387769	1.20712	0.912538	0.558052	0.546303	0.664364	0.567143	2.01706	1.69035	0.458504	0.285037	0.672863	0.223874	0.395408	0.148487	1.05867	1.25508	0.321001
AC253536.3	0.0799844	0.172051	0.275617	0.118408	0.186109	0.201013	0.186589	0.678219	0.24655	0.179541	1.12891	0.561475	0.305517	0.181971	0.585943	0.126562	0.291296	0.698875	0.165108	0.122124	0.577138	0.674161	0.0453124	0.212809	0.805572	0.0923262	0.177249	0.192604	0.263618	1.31688	0.934182	0.166215	0.460978	0.0361633	0.144705	0.527198	0.0689087	0.156737	1.48279	0.492533	0.0675806	0.0816381	0.343764	0	0.262263	0.453638	0	0.487349	0.539374
RAD51-AS1	2.1842	1.61328	1.18892	1.25638	0.918475	1.93445	2.39419	1.49225	1.78458	1.31925	2.89258	2.98648	1.41982	0.975031	1.52742	1.59066	2.46786	1.45223	1.37616	0.783512	3.39259	2.32895	1.29702	1.59637	3.92513	3.26544	1.24964	1.86937	2.00353	2.94095	1.67648	0.820296	2.62888	1.93939	1.2188	1.78555	1.43965	1.14481	3.44982	3.98368	0.744861	0.725212	2.32487	2.20455	3.71034	0.83021	0.292632	1.8658	2.18866
AC000061.1	0.17805	0	0.0454474	0.219654	0.197281	0.149155	0.138453	0.125813	0.121964	0.177631	0.203072	0.185167	0.056675	0.115737	0.334448	0.0375648	0.756517	0.0545874	0.0408379	0.0453095	0.228399	0	0	0	0.341572	0.137016	0.187889	0.0952775	0.234732	0.532991	0.252066	0.148002	0.0570092	0	0.128849	0.0920453	0.30679	0.046521	0.57633	0.243647	0.150439	0.0807696	0.510161	0	0.389209	0.0841523	0.32999	0.131499	0
AL359715.1	0.286404	0.205357	0.475181	0.370991	0.333205	0.239925	0.695966	0.632431	0.367848	0.428595	1.06162	0.781861	0.455825	0.341311	0.591776	0.317232	0.434607	0.417083	0.164225	0.182207	0.344431	0.678937	0.270421	0.457209	0.366292	0.495895	0.347565	0.229889	0.50344	0.833531	0.506829	0.218231	0.298033	0.258984	0.552695	0.66627	0.246745	0.467698	0.990267	0.612374	0.241989	0.178643	0.775032	0.210466	0.626065	0.135364	0.0663509	0.713893	0.643788
AL355075.2	0.280113	0.552327	0.107248	0.172782	0.18622	0.410646	0.490088	0.593797	0.623597	0.20959	0.678889	0.619032	0.490393	0.18208	0.420929	0.236391	0.42506	0.687025	0.289112	0.106923	0.898307	0.393495	0.317377	0.397481	0.492588	0.485002	0.177355	0.337258	0.276965	0.698761	0.198278	0.155227	0.582973	0.0844315	0.202708	0.434423	0.201104	0.256157	0.329707	1.43741	0.157782	0.127068	1.11472	0.960599	3.06156	0.297878	0	1.03439	1.57411
AC007938.3	0.250738	0.115575	0.24686	0.212108	0.166692	0.09002	0.376023	0.227797	0.404849	0.214412	0.18384	0.167631	0.205231	0.209553	0.565179	0.113358	0.456581	0.131781	0.197176	0.109383	0.275692	0.264172	0.202924	0.533696	0.240508	0.24808	0.181435	0.316266	0.306948	0.321677	0.190163	0.119099	0.344068	0.129561	0.388822	0.444418	0.277736	0.196538	0.758908	0.808767	0.151324	0.194988	0.957905	0.526446	0.861299	0.253943	0	0.277774	0.885682
LINC01748	0.0868796	0.0667439	0.0475201	0.0643079	0.0247534	0.0311916	0.0289534	0.0131551	0.165784	0.167159	0.09555	0.0871254	0.213335	0.129083	0.0559521	0.0157112	0	0.0456615	0.0683205	0.0758014	0.107467	0.0261528	0.281249	0.0264176	0.011905	0.0859589	0.0550084	0.0199245	0.098175	0.0619221	0.0263562	0.0619009	0.178828	0.134677	0.10778	0.0481216	0.11762	0.0680997	0.0328698	0.0254759	0.0629199	0.00844532	0.106686	2.40783	3.25568	0.545539	1.27665	5.63735	0.753264
AC106820.3	0.168632	0.120912	0.172174	0.0416069	0.0373691	0.141266	0.524517	0.0595791	0.288781	0.168235	0.528908	0.263059	0.322062	0.21923	0	0.142311	0.204714	0.2068	0.270744	0.0858256	0.378556	0.177668	0	0.358934	0.21567	0.0648841	0.213541	0.315832	0.555789	0.560886	0.358099	0.233623	0.107987	0.254145	0.122033	0.435882	0.193708	0.220301	0.198489	0.115379	0.0474937	0.152994	0.805292	0.165227	0.491495	0.119551	0	0.37363	0.884465
AP005233.2	0.18045	0.064693	0.0460599	0.0890455	0.19994	0.151166	0.0701594	0.255018	0.309019	0	0.102904	0.187663	0.0574388	0.195495	0.338955	0.0380711	0.438121	0	0	0.183681	0.405086	0.633729	0.136304	0	0.230784	0	0.114253	0.0965615	0.237896	0.180058	0.127732	0.049999	0.46222	0.0543912	0.609399	0.233214	0.103642	0.141444	0.106199	0.555594	0	1.5553	2.18304	9.54754	4.20751	0.383789	0.501656	1.26608	1.48728
AC090948.2	0.316534	0.255331	0.757457	0.61503	0.447171	0.397748	0.599962	0.629067	0.528509	0.532894	1.28612	0.864114	1.28463	0.617265	0.535117	0.651123	0.648443	0.473091	1.71519	0.57392	0.609065	0.541928	0.448304	0.800071	0.834955	0.502392	0.701454	0.412869	0.834604	0.98702	0.588155	0.920903	0.950153	0.322008	0.486763	0.889771	0.647669	0.589266	0.803368	1.0152	0.40117	0.403848	0.453476	0.232607	0.345963	0.504914	0.219993	0.482164	0.622575
STAG3L5P-PVRIG2P-PILRB	0.175345	0.100581	0.196931	0.090853	0.17097	0.168923	0.306787	0.210634	0.312289	0.192426	0.799948	0.27809	0.234419	0.144373	0.375479	0.155375	0.383155	0.134395	0.156848	0.120477	0.854733	0.351008	0.258274	0.267477	0.398054	0.438537	0.144327	0.295565	0.235019	0.279944	0.378562	0.0777355	0.409845	0.206125	0.169189	0.412444	0.171207	0.151187	0.412781	0.719837	0.138276	0.210788	0.854098	0.412332	0.383296	0.203041	0.129991	0.569807	0.630635
AC000123.1	0.432474	0.325597	1.09285	0.832299	1.00629	0.380404	1.10977	0.962618	0.62211	0.841339	1.10981	0.809568	0.495577	0.843356	1.90091	0.848557	1.33877	0.715984	0.833219	0.462227	1.16501	1.00242	0.343004	1.10463	1.20301	0.748808	0.547647	0.485989	0.655674	2.24398	0.964301	0.97062	1.20471	0.74303	0.845009	0.771325	0.745176	0.745778	1.79438	1.55348	0.986598	1.32425	3.51093	0.889857	1.70166	1.01178	0.120229	1.53314	1.94426
AL031714.1	0.357925	0.192479	0.414929	0.386363	0.343706	0.412279	0.620432	0.547984	0.388197	0.371961	0.854721	0.538961	0.450976	0.319908	0.81239	0.295765	0.588399	0.448081	0.318115	0.201142	0.851321	0.659931	0.13518	0.370341	0.839233	0.476275	0.346229	0.686321	0.550515	0.77382	0.496159	0.23967	0.849969	0.431543	0.348955	0.528117	0.30408	0.416938	0.754823	1.43876	0.31922	0.368708	1.38639	0.496822	1.77128	0.560365	0.12438	0.776516	1.47502
ZEB1-AS1	0.594152	0.733002	0.298854	0.413919	0.34078	0.519689	0.638668	0.660627	0.35911	0.819395	0.483323	0.422535	0.333748	0.272621	0.538329	0.412928	0.371248	0.857212	0.280567	0.231243	0.375479	0.74873	0.244197	0.688121	0.603436	0.665659	0.19916	0.299237	0.376291	0.41849	0.247395	0.125891	0.42524	0.321307	0.299291	0.582689	0.401473	0.301348	0.555364	0.310871	0.334675	0.539054	0.88458	1.06158	0.993189	0.871353	0.0323874	1.08412	0.53684
AC104695.3	0.0575887	0.216784	1.10247	0.98042	0.516852	0.470369	1.07475	0.732477	0.325447	0.473989	1.2069	0.718688	0.687413	0.898419	0.778854	0.61965	1.4157	0.370772	0.515137	1.16507	2.43783	0.728093	0.260999	0.88869	0.248577	0.830936	0.729254	0.970724	0.455532	1.14927	2.10955	0.454765	0.608491	0.520752	0.458425	1.71929	0.421721	1.39935	0.788	1.30029	0.559567	0.333083	1.18255	0.507834	0.692373	0.694067	0.400246	0.446588	0.711974
AC009065.3	10.6572	10.1076	9.52094	7.81674	7.06353	9.61762	6.5167	5.54525	6.03923	5.8477	8.72945	5.71794	9.83766	7.36832	8.04379	4.43558	7.88016	1.27723	2.88879	5.94177	6.18298	7.4515	15.1486	4.50243	7.83722	9.17035	8.5471	8.52837	6.76953	7.66945	4.32051	8.32183	5.18049	7.97236	9.48845	12.8469	6.70529	8.12576	8.75238	8.08724	17.7362	18.393	17.1186	8.35365	11.7893	3.64035	22.1757	5.90319	5.44448
AL133330.1	0	0.170462	0.169911	0.046926	0.0421465	0.0398313	0.0739464	0.134391	0.130279	0.0948713	0.189803	0.12362	0.0908088	0.144233	0.750228	0.040126	0.173164	0.116619	0.0436223	0.120997	0.152482	0.133587	0	0.033735	0.0912154	0.109769	0.04014	0.152661	0.0626842	0.474443	0.0673132	0.0526978	0.0913443	0.114654	0.0917561	0.0983211	0.054618	0.0248464	0.167898	0.260259	0.187479	0.107846	0.363296	0.0931749	0.623619	0.202252	0	0.737442	0.641273
AC011468.1	0.495903	0.213343	0.55695	0.758602	0.527486	1.45399	0.616987	0.455537	0.475568	0.346315	1.13119	0.567298	0.694542	0.515759	0.7452	0.62775	1.50503	0.516923	0.38672	0.429064	0.572521	0.801127	0.337124	0.703688	0.570805	1.25933	0.690765	0.796096	0.544811	0.82471	0.526539	0.219847	0.793906	0.29895	0.741661	0.538363	0.398752	0.46645	0.729629	1.0179	0.5028	0.472412	2.49445	1.16614	1.30082	0.585949	0.367633	1.53825	0.891765
AC005005.3	0.601414	0.714927	0.278744	0.292871	0.12626	0.159099	1.08916	1.15748	0.211404	0.994736	0.419682	0.35799	0.211587	0.246906	0.410256	0.150259	0.317016	1.42655	0.250472	0.253733	0.258853	1.56742	0.233118	0.791649	0.349163	0.091344	0.150312	0.228666	0.219083	0.615901	0.184849	0.157869	0.182429	0.114492	0.206158	0.650453	0.218162	0.248112	0.586808	0.406078	0.213957	0.172308	0.816257	0.279128	0.242174	0.224406	0.263992	0.508464	0.177879
AC005586.1	2.32052	1.1231	3.13926	2.49057	0.925615	3.79067	1.44356	1.35277	2.58301	1.79417	2.64662	4.28356	2.03126	2.18717	1.8743	1.78696	1.76065	0.747006	1.03786	1.21056	3.3488	0.896447	2.10338	1.89337	2.70811	2.36608	2.64465	3.10436	2.65135	2.2383	1.31407	1.89676	2.63764	2.44807	2.323	1.79943	2.89882	2.33427	2.93622	3.49298	2.12405	2.73693	2.25324	2.15998	2.95898	0.987076	0.64511	0.942601	1.82565
OSER1-DT	5.70651	4.44668	2.00118	2.35755	2.04277	4.38706	3.85793	2.28306	2.28662	4.82741	3.12616	3.85378	2.99273	2.34241	1.50719	3.26295	2.99284	4.85423	3.8493	2.57962	2.34731	4.0763	4.5225	4.09586	3.97553	5.4676	2.2687	2.67945	3.72794	2.05763	1.77761	1.75653	2.32397	4.17245	3.20617	2.13734	3.27168	2.53656	2.50531	2.52497	2.32884	1.95192	8.8432	3.9009	19.258	1.30994	2.1001	3.99214	2.5471
MIR194-2HG	3.29809	1.68475	4.96201	4.29367	7.11472	7.15832	5.93096	3.02228	6.63293	2.86607	6.91425	6.99665	6.70204	3.77857	5.37215	4.39958	8.44582	0.725996	7.89856	6.05873	9.08938	3.43613	3.63978	3.65326	5.85753	4.25197	4.18029	7.5735	6.0582	7.13136	10.3886	4.42506	6.32425	7.85144	4.3262	2.49105	4.12239	4.17273	6.6927	14.2303	4.52375	2.9978	4.54085	5.57568	7.00882	0.121464	1.49694	1.10492	3.5486
XIST	0.00111965	0.00481684	1.64701	1.21247	1.00859	1.15648	0.00914173	0.00237348	0.0103538	1.58839	7.03558	1.60687	1.35786	1.1703	0.00252376	0.000708663	0	0.0010298	1.45453	0.709457	5.51738	4.53806	0	0.0071495	0.00107397	3.0475	0.986094	0.00179742	0.00664237	0.00558607	4.3356	1.04331	2.11978	2.68805	1.23644	0.023442	1.08614	0.00702098	0.00790728	0.00114911	0	0.742816	0.0106936	3.30757	3.7936	0	0.0249011	8.54865	1.01929
AL158837.1	0.691192	0.530998	1.70126	1.20596	1.08313	1.11669	1.20932	0.837271	0.913109	0.664939	1.14026	2.04094	1.13149	0.802307	1.66928	1.59368	1.43843	0.181636	0.339713	1.05535	2.37495	0.520163	0.671265	1.15595	1.23127	1.70967	1.3129	1.30775	1.69229	1.13306	2.04441	1.10805	1.04332	0.75895	1.03611	1.26338	1.27603	0.851375	1.0896	2.0268	0.792577	0.83986	0.377228	0	0.431689	0.105004	0.137252	0.0546944	0.110977
AL445524.1	5.26745	4.23134	3.48125	5.1932	4.76598	3.87249	3.41616	2.03864	3.84024	3.69599	3.06617	3.0004	3.46467	3.77916	2.93135	3.30629	2.8258	2.2314	4.24106	3.17033	3.13316	3.26994	4.30898	3.65197	3.6479	3.73392	3.32128	4.03506	3.28487	3.00967	3.31859	3.66996	3.44311	5.00031	3.76442	3.627	3.29527	4.2145	3.60813	3.02828	10.5448	5.94894	3.5905	5.78214	2.43665	3.74985	12.9423	4.72161	4.12692
MNX1-AS2	0.656342	0.256696	0.822428	0.574153	0.634676	1.42456	0.487176	1.13837	0.30654	0.357163	1.58222	0.930787	0.512803	0.387853	0.874215	0.79308	1.08652	0.164638	1.60119	0.182207	2.1814	0.69151	0.270421	0.317506	1.31636	1.03312	0.302231	0.909976	0.904619	1.07168	0.316768	0.24799	0.515827	1.18701	0.431793	0.508956	0.462647	0.748316	1.2115	2.20455	0.403315	0.690213	2.67842	0.876941	1.43473	0.211506	0	0.594911	0.804735
LINC00342	0.647818	0.375877	1.78193	1.08521	1.79636	1.0818	1.72003	1.77984	2.92527	1.28834	3.32486	1.82168	2.32796	1.21343	2.34405	1.47286	3.5079	1.66206	0.821125	0.865484	2.44382	2.61337	0.270421	2.00482	2.19939	1.48572	1.39782	1.92258	1.65753	3.15551	2.54319	0.963617	2.39081	1.09451	1.3694	2.57783	1.0281	0.948758	3.13033	2.91315	1.45482	1.24702	4.62414	2.38027	4.78865	1.29925	0.521328	2.71015	2.33756
AL590617.2	0.512162	0.570518	0.364175	0.528033	0.231045	1.12625	0.704067	0.232652	0.676599	0.875927	0.76668	0.556412	0.541478	0.368588	0.72153	0.439939	0.599544	0.286002	0.465686	0.279285	0.862301	0.809407	0.663196	0.389335	0.684265	0.781216	0.451674	0.631331	0.506406	0.474546	0.407852	0.304092	0.878502	0.512749	0.34416	0.453889	0.425483	0.630855	0.839672	1.27655	0.262734	0.858806	1.29278	1.1291	2.23912	1.25787	1.88148	0.628178	1.06902
AP001816.1	6.94892	4.86099	1.94676	4.57902	4.43189	7.77346	4.90929	4.3713	4.96315	6.46758	4.80844	4.09806	6.09622	4.27827	5.18928	5.79278	2.52045	4.62459	3.47918	5.41282	6.38651	6.07128	7.5853	5.35114	4.47071	7.95594	5.00785	5.39632	4.67365	2.95956	3.53914	2.30109	4.44989	5.74722	4.49721	4.88469	5.23226	5.77897	5.36139	4.81249	4.15287	2.57563	3.02164	4.98191	3.0874	2.82368	27.0926	7.91725	4.38122
AC005332.6	8.39606	6.84455	6.96165	8.18829	7.60824	6.58552	9.16054	9.57939	7.45728	9.48908	8.8484	9.43282	7.09111	8.65079	9.10102	7.75124	9.80767	9.51409	8.20057	6.28147	7.92337	9.42547	5.0032	8.88674	8.72037	8.95083	8.00547	7.0459	7.93156	10.0549	5.24826	6.19168	8.30707	7.01883	7.55761	8.02133	8.04958	8.10819	8.88219	8.35039	7.44259	5.95743	9.25939	5.79375	6.89712	5.72489	3.67428	9.47911	1.7688
LINC00265	0.76654	0.3082	0.795439	0.689352	0.762019	0.909202	1.20327	0.858035	0.868585	0.578913	1.58716	1.26841	1.4503	0.805615	0.871991	0.970342	0.847937	0.68526	0.685185	0.721927	1.31643	1.19255	0.495135	0.815792	1.26438	1.84406	0.89357	1.29382	1.40724	1.47971	0.981238	0.720547	1.65153	0.796801	0.668774	0.894391	0.555473	0.797383	1.44825	3.02185	0.617402	1.36004	9.25747	1.6004	1.81656	0.71104	0.43815	1.68251	0.869578
LINC00641	1.25733	2.26782	0.989712	0.580946	0.513988	0.78015	2.08142	3.98147	0.882663	2.38993	2.07421	1.41317	0.753207	1.09649	1.59308	0.556078	1.28698	5.17162	1.45087	0.834678	1.41252	1.92945	0.729994	3.56969	1.22851	1.04568	0.600773	0.642519	0.725842	2.8248	1.09039	0.577749	1.0277	0.550822	1.00031	2.39205	0.985666	1.27325	1.85797	2.12798	0.841299	0.534054	0.89505	0.493542	0.785274	0.730822	0.108553	1.18959	1.47457
AL157392.3	0.269542	0.212988	0.354886	0.333881	0.246848	0.340428	0.498864	0.639898	0.319344	0.413652	0.77522	0.559918	0.326995	0.324495	0.55487	0.330761	0.601009	0.705791	0.334031	0.224674	0.571568	0.55493	0.126211	0.449318	0.51973	0.485749	0.357869	0.469136	0.468664	0.867249	0.560707	0.253776	0.520464	0.31835	0.360261	0.538533	0.327001	0.333087	0.736913	0.868012	0.226581	0.252657	0.77625	0.379981	0.706446	0.410457	0.0955785	0.60026	0.902646
HIF1A-AS3	0	0.135091	0.160302	0.154952	0.194838	0.0526102	0.146505	0.221885	0.0860382	0.0626542	0.179069	0.261249	0.0399809	0.108861	0.14156	0.0794992	0.457438	0.115525	0.0576174	0.127853	0.443086	0.176445	0.0948755	0.267348	0.321279	0.193313	0.212072	0.168032	0.496769	0.0835541	0.40009	0.104407	0.201083	0.113579	0.242388	0.25973	0.180352	0.0656356	0.295685	0.300787	0.106126	0.0854672	0.0399876	0.246136	0	0.415551	0.116394	0.463825	0.84701
AC020913.3	0.178525	0.384018	0	0.132143	0.118684	0	0.208233	0.378447	0.183433	0	0.30542	0.417737	0	0	0.201204	0.112995	0	0	0	0	0.171756	0.188091	0	0	0.342483	0.412144	0.113034	0	0.470717	0.71255	0.758216	0.148397	0.342967	0.161433	0	0.138436	0	0	0.788	0.183222	0.30168	0	0.341014	0	0.390247	0.25313	0	0.39555	1.20388
AC010973.2	0.127	0.214644	0.277857	0.120863	0.192983	0.227978	0.169295	0.17307	0.298266	0.325802	0.636292	0.311322	0.2079	0.141519	0.490741	0.0803826	0.330372	0.350425	0.299611	0.180059	0.488737	0.439643	0.0411127	0.482713	0.208831	0.27225	0.114872	0.247567	0.179389	0.543102	0.134845	0.180972	0.296262	0.213275	0.210069	0.54868	0.125044	0.0853263	0.224228	0.651706	0.19928	0.395049	0.502511	0.693282	0.237955	0.424456	0.4035	0.401981	1.79441
HOXA-AS2	0.781745	0.981678	0.627744	0.5849	0.500043	0.743377	0.88226	0.739013	0.629565	0.518532	1.09523	0.896489	0.641594	0.590557	0.985827	0.534913	0.623271	0.699579	0.601873	0.29679	0.918787	0.743495	0.502718	0.737533	0.741744	0.868226	0.618039	0.830994	0.896911	1.22278	0.439696	0.46014	1.07157	0.580804	0.657461	0.353889	0.680775	0.65251	1.34666	1.02783	0.467715	0.38242	2.11076	0.993678	0.415667	0.53025	0.375917	0.716236	1.61475
AC098851.1	0.117451	0.210536	0.209855	0.202852	0.0780819	0.0491952	0.273991	0.290474	0.160907	0.234349	0.36838	0.3359	0.299085	0.458075	0.132371	0.297355	0.213872	0.25206	0.161632	0.149442	0.301327	0.41248	0.177434	0.166663	0.337977	0.36153	0.173518	0.0942746	0.283875	0.976631	0.37412	0.0976296	0.564091	0.070804	0.0849951	0.303588	0.33729	0.0920626	0.725789	0.763427	0.0992368	0.133199	0.0373919	0.230158	0.513483	0.222044	0	0.607204	0.264009
AP003419.3	0.129491	0.0928476	0.297474	0.255597	0.0860864	0.488145	0.100693	0.183001	0.266103	0.322966	0.553833	0.606002	0.206091	0.22446	0	0.327838	0.235797	0.1191	0.148501	0.164762	0.415272	0.13643	0.0489059	0.275622	0.289819	0.199296	0.136647	0.311817	0.398334	0.34456	0.320812	0.215276	0.456074	0.195156	0	0.33471	0.0371867	0.203001	0.266731	0.354395	0.18235	0.264337	1.03063	0.888136	0.75483	0.0918025	0.239992	0.382543	0.485124
AL133355.1	1.46715	1.05533	1.64585	1.58401	1.36055	1.58525	1.90749	2.19889	1.32505	1.83195	1.80656	1.98985	1.62411	1.36675	1.63246	1.85131	1.49747	2.28627	1.05453	1.61232	1.59133	1.43746	0.836458	1.84983	1.88237	1.89849	1.78687	1.71771	2.24837	2.16331	1.46849	1.02536	2.18125	1.42809	1.75827	1.59422	2.03688	1.78728	1.40243	1.91816	1.25542	0.9093	1.39233	0.631779	0.960092	1.04013	0.467624	2.40179	0.966266
PAXIP1-AS2	1.71832	2.5825	0.91934	1.23301	0.688402	1.52747	1.5579	1.78152	1.14106	2.1784	1.46985	1.31684	0.967325	1.45838	1.28543	1.15882	0.956457	2.34649	0.810606	0.716055	1.54488	2.25311	1.12224	1.18188	1.72019	1.63701	1.09272	1.09617	1.56299	1.45253	0.932154	1.13518	1.72262	1.06527	1.29236	1.82122	1.1119	0.95282	2.03359	1.79434	1.16655	0.908834	1.22548	0.529349	0.918537	1.15968	0.292042	1.23027	1.13007
AC002553.1	0.4452	0.209486	0.575289	0.885625	0.739928	0.629355	1.26576	0.324416	0.65757	0.458032	2.02312	0.911522	0.770554	0.506434	1.47391	0.634011	2.02672	0.537434	0.689254	0.44609	1.01726	0.820845	0.220686	0.592256	1.01421	0.770843	1.0042	0.960378	0.660295	1.49929	1.4772	0.647618	1.09583	0.704508	0.563808	0.755185	0.431496	0.501638	1.351	2.22745	0.681789	0.473338	2.41835	0.736105	4.50098	0.414256	0	1.57209	2.81456
TSPOAP1-AS1	0.439992	0.379912	0.322688	0.197243	0.26367	0.350418	0.397557	0.2496	0.458456	0.333854	0.397572	0.236845	0.3669	0.261836	0.467949	0.482449	0.259545	0.518679	0.174828	0.212895	0.357726	0.5158	0.351074	0.389119	0.647922	0.300438	0.133406	0.283531	0.318626	0.451403	0.223717	0.226655	0.476211	0.207339	0.219746	0.249885	0.192202	0.223445	0.229769	0.451569	0.335107	0.198189	1.63357	1.47548	0.73151	0.404193	0.206736	0.446243	1.19798
AC108860.2	2.01383	0.780613	1.22897	1.17283	1.41356	2.36353	1.13274	0.942649	1.24992	0.795476	1.27666	1.39533	1.28855	0.704355	1.4747	0.763479	1.17272	0.225651	0.506442	0.717978	2.42922	1.02317	2.44388	1.65365	1.70614	1.39238	1.07442	1.65747	1.52287	1.40764	1.09625	0.909212	1.05066	1.06303	1.02827	1.08599	1.2682	1.58653	1.39876	1.9619	0.863719	0.584294	1.67929	0.631012	2.12285	0.326124	0.738887	1.76666	0.758286
LINC01871	6.42837	7.9016	10.4076	3.87458	3.23574	6.57758	2.0352	1.75207	11.9836	4.39766	4.63472	3.79631	24.4668	7.87965	6.624	6.45187	2.34115	1.09804	4.23369	15.0032	3.18067	5.70852	12.6942	4.49578	3.34732	2.75611	6.6867	3.83306	5.56918	3.57374	2.14516	11.6794	4.58701	5.81292	3.18994	2.20757	3.79764	4.39097	3.81029	4.99526	3.33648	4.99907	1.40335	1.88957	3.6134	5.33865	4.08481	0.50868	1.65142
AC138207.4	0.779234	0.404594	0.781882	0.507173	0.589492	0.742814	0.720855	0.441445	0.690222	0.361893	0.586109	0.565869	0.7826	0.471589	1.02964	0.484701	0.733939	0.432493	0.277334	0.553862	0.943574	1.06162	0.380559	0.41465	0.773216	0.66685	0.450844	0.57155	0.76162	0.496018	0.741782	0.312697	0.800119	0.680332	0.554182	0.468816	0.555584	0.4423	0.818362	1.00657	0.590283	0.329108	0.487603	0.197457	0.763578	0.781031	0	0.312558	0.301997
AL391001.1	0.374528	0.33568	0.501892	0.739264	0.705467	0.470622	0.546066	0.198486	0.288619	0.420353	0.667439	1.04678	0.566274	0.426042	0.527633	0.888946	1.42083	0.287061	1.71805	0.548023	0.360328	0.361713	0.53044	0.730753	0.329311	0.756558	0.750927	0.726507	0.576052	0.186857	0.530221	0.311322	0.419715	0.762009	0.429136	0.314628	0.430222	0.366963	0.578601	0.544542	0.316447	0.55217	0.56637	0.275224	1.50095	0.132761	0.2603	0.760673	0.631407
AL359076.1	2.60349	3.42873	2.44118	1.29784	1.2363	2.00295	1.85922	3.15372	2.23833	1.51071	2.22702	2.11355	1.31918	1.9341	3.95222	1.84962	3.67657	2.3457	1.38927	1.46026	2.70925	2.12722	2.46823	2.60113	3.56753	1.53327	1.85026	1.57798	1.68113	3.07499	2.6515	1.50164	2.09251	1.29723	1.3073	2.84288	1.14438	1.49931	2.57976	2.89012	1.39168	1.37385	4.31342	0.624716	3.71664	2.07175	1.32939	2.70763	2.62752
AL139393.3	0.374682	0.485949	0.3713	0.220239	0.234438	0.263103	0.424178	0.385455	0.26043	0.742104	0.414768	0.429771	0.178897	0.279369	0.57132	0.341775	0.220737	0.506787	0.257813	0.227152	0.233249	1.89252	0.724193	0.69196	0.317114	0.457938	0.286075	0.212292	0.290566	0.296896	0.175513	0.174046	0.349319	0.189335	0.295069	0.282	0.322799	0.215949	1.13822	0.237511	0.614533	0.382429	0.231553	1.65203	0.746769	1.25002	0.0306361	1.50162	0.718366
EBLN3P	9.21471	8.21139	5.9702	6.62195	4.54929	8.62475	7.01819	5.71712	7.0418	7.27853	6.93414	7.87996	5.13434	5.73024	5.76875	6.67765	7.53419	5.41061	5.56836	3.90236	8.19638	7.23872	7.56619	7.10322	10.6151	12.2219	5.95858	7.16708	7.71458	7.41896	5.74173	4.99006	8.09409	5.93888	5.59476	7.53252	6.32251	5.4502	7.12883	9.655	4.83372	6.76202	14.4029	10.8061	16.0571	6.66453	4.66984	13.9568	9.40872
SCAT2	0.0303614	0.0653091	0.116246	0.112367	0.18166	0.152605	0.212483	0.160904	0.218373	0.136305	0.363596	0.094725	0.115972	0.118414	0.307965	0.269036	0.221147	0.1117	0.208912	0.0695362	0.233682	0.223918	0.275204	0.161561	0.232982	0.140185	0.134565	0.170592	0.120081	0.242364	0.257896	0.302851	0.262475	0.192182	0.153801	0.235436	0.104629	0	0.348435	0.373923	0.102612	0.0826377	0.956927	0.267735	2.522	0.215247	0	0.538163	0.272989
GABPB1-AS1	0.310463	0.205376	0.215853	0.384608	0.13731	0.723108	1.06214	0.305661	0.356371	0.264374	0.55114	0.342461	0.5979	0.476234	0.251812	0.493313	0.728553	0.40861	0.293175	0.0981781	0.841085	0.858118	0.281117	0.392622	1.1725	1.05861	0.412882	0.643332	0.570277	1.00195	0.255162	0.256989	0.395543	0.472205	0.20681	0.616471	0.763247	0.337029	1.07794	1.53983	0.153658	0.247495	1.6141	1.52733	4.21959	0.353637	0.263623	0.758392	2.69511
AC110792.3	0.673962	0.402703	0.860146	0.332576	0.348486	0.282294	0.262038	0.238117	0.153887	0.224126	0.448394	0.642493	0.143019	0.292061	0.928374	0.379178	0.409085	0.413252	0.309162	0.228676	0.216136	0.315589	0.169693	0.796962	0.287318	0.259319	0.284482	0.360648	0.493621	0.747221	0.715598	0.248988	0.287724	0.13543	0.270958	0.174207	0.193546	0.410883	0.264429	0.76855	0.442902	0.101911	0.786736	0.440236	0.654777	0.212358	0	0.580715	0.336656
AL049840.4	0.792518	0.807514	1.72479	1.17324	1.1092	1.41517	1.45958	1.28212	1.07146	0.99872	1.39152	1.20376	1.19494	1.32856	1.12825	1.05603	0.911456	1.26602	0.602721	1.56034	2.12689	1.8018	0.945209	1.42053	2.0405	0.674067	1.18844	1.64055	1.73219	2.33077	2.30299	1.45623	2.04338	1.13154	0.965925	1.16442	1.14994	1.20972	1.73065	2.3973	0.986803	1.44751	1.43417	0.735647	0.547075	1.83342	0.231918	2.21804	0.843843
AC245014.3	0	0.207502	0.0492456	0.333215	0.213769	0.0808105	0.0750119	0.204492	0	0	0.220043	0.0501606	0	0	0.289919	0.203521	0	0.0591495	0.221254	0.0490962	0.247487	0.203268	0.0728655	0.205327	0.308432	0.148467	0.0407184	0.0516201	0.0847833	0.192512	0	0.0534571	0	0.116306	0.0930782	0.0498689	0	0.151227	0.0567723	0.132005	0.0543371	0.0875198	0.122844	0.37807	0	0.136778	0	0.213734	0
PTPRD-AS1	0.832139	1.02009	0.657767	0.562961	0.410446	0.944452	0.824499	0.559551	0.928567	0.4017	0.390348	1.43768	0.358866	0.407137	0.544557	0.42475	0.505095	0.115216	1.0836	0.232252	0.550942	0.490213	0.456213	0.476132	1.04709	1.6732	0.385241	0.172371	0.412868	0.401773	0.446523	0.386761	0.567258	0.517829	0.466212	0.346923	1.03297	0.462897	1.04266	0.633638	0.400687	0.931538	1.22206	0.0789036	2.13196	0.190304	0.0746248	0.0396501	0.0804519
LINC01843	12.9015	8.65081	8.27398	9.90778	9.64914	13.9066	4.46751	4.91433	7.97447	5.9127	8.84601	8.19185	8.95127	8.91047	4.7711	7.06856	6.49731	0.648934	5.60383	9.40309	6.92378	3.92918	21.3558	5.72819	6.84503	8.65614	6.68812	7.41082	8.54423	5.87355	5.26539	7.64104	9.15896	11.9215	6.76889	7.62837	7.98893	6.58909	8.04372	7.07566	8.20967	4.96554	5.10212	5.86623	8.06404	1.38627	6.61291	4.24314	2.58286
AL157932.1	0.55328	0.330594	0.84735	0.318528	0.245216	0.386243	0.501939	0.390957	0.442161	0.459982	0.631034	0.527446	0.352228	0.279725	0.623566	0.428011	0.223888	0.73505	0.296103	0.0938643	0.414013	0.388617	0.278615	0.785106	0.766578	0.49673	0.42816	0.592138	0.405231	0.368053	0.39164	0.459908	0.295254	0.333539	0.355902	0.381367	0.529629	0.48187	0.596969	0.441652	0.571363	0.250986	1.11558	0.361406	1.34383	0.348664	0.341807	0.612939	0.690934
TPM1-AS	0.339326	0.758533	1.13106	0.389063	0.698872	0.376224	0.302664	0.726371	0.587928	0.338527	0.853702	0.747294	0.59088	0.480064	0.862345	0.446387	0.315006	0.991362	0.705032	0.711119	0.92817	1.16365	0.294004	0.495665	1.07856	0.322564	0.539222	0.99334	0.504364	1.07552	0.812414	0.359489	0.370679	0.601644	0.380375	0.588168	0.492962	0.453725	0.933899	0.955991	0.449731	0.230894	0.177929	0.21513	0.436323	0.136791	0.295948	1.24568	0.837525
ACTA2-AS1	0.820273	1.15368	0.515385	0.508564	0.270331	0.510962	2.23247	1.58281	0.273738	2.39208	2.53078	1.12648	0.488726	0.328122	1.14572	0.394932	0.382995	5.77121	0.274973	0.331843	0.674506	1.54379	0.262137	0.895361	0.591787	0.865917	0.301851	0.236353	0.494489	2.48346	0.48386	0.238936	0.606092	0.3677	0.436324	1.22322	0.477165	0.428642	1.96814	1.19443	0.621984	0.362562	0.227664	0.453375	0.444438	1.61039	0.194904	0.388342	0.614612
AC093788.1	0.24073	0.155347	0.110603	0.213825	0.144035	0.362993	0.308868	0.178609	0.395757	0.216147	0.514799	0.281646	0.183903	0.031296	0.596883	0.243786	0.569865	0.0664235	0.11595	0.0735119	0.347403	0.278991	0.190928	0.307436	0.484908	0.250087	0.121936	0.328486	0.333234	0.33629	0.255601	0.140073	0.231235	0.0435364	0.156787	0.261341	0.165916	0.30191	0.340021	0.222357	0.183058	0.196565	0.850696	0.212282	0.947201	0.29013	0.0669235	0.533373	0.54112
FP671120.8	0.169241	0.182024	0.277707	0.375814	0.208952	0.394947	0.0846017	0.128131	0.422314	0.144722	0.0827249	0.282867	0.346313	0.157158	0.326984	0.137724	0.220129	0.111186	0.149724	0.221491	0.116303	0.0764182	0.219149	0.180115	0.208718	0.362803	0.183696	0.232878	0.0796852	0.0964991	0.256709	0.160777	0.232237	0.349801	0.174963	0.0562444	0.104147	0.227414	0.234778	0.421828	0.306419	0.329029	0.369463	0.355337	0.475653	0.0514213	0	0.321411	1.08693
AC068888.1	0.897071	1.16548	0.583589	0.675761	0.56735	0.78308	0.671331	0.883513	0.595457	0.74844	1.12387	0.798768	0.579936	0.492813	0.756036	0.552714	0.592695	0.94556	0.723779	0.381818	0.656841	1.33407	0.778049	0.878671	0.936621	1.40204	0.560447	0.592612	0.504982	0.796105	0.590038	0.359642	0.529977	0.348164	0.551516	1.105	0.656582	0.497813	1.12481	1.09992	0.694234	0.526683	0.712721	0.653385	1.1974	0.711957	0.926929	1.29282	0.731638
AC022098.1	0.434265	0.436932	0.343266	0.28515	0.395801	0.308049	0.498361	0.541953	0.482189	0.398305	0.629102	0.666509	0.461512	0.327813	0.552584	0.469926	0.382634	0.766622	0.395202	0.320836	0.849078	0.966725	0.174594	0.641071	0.638259	0.679145	0.354784	0.52286	0.540194	0.705896	0.513152	0.250356	0.639162	0.430691	0.293988	0.554005	0.392235	0.378826	0.58123	0.877006	0.343248	0.257367	0.434831	0.267651	0.474641	0.536293	0.253137	0.457812	0.5668
AC096992.2	0.490308	0.285049	0.345012	0.372733	0.396437	0.599456	0.540986	0.463507	0.735259	0.575087	0.578104	0.640828	0.620059	0.318712	0.552594	0.410982	0.796306	0.390021	0.364728	0.263032	0.573711	0.488656	0.40539	0.606429	0.635546	0.489482	0.461467	0.478651	0.559046	0.489243	0.478387	0.264365	0.789192	0.443366	0.460306	0.380206	0.627912	0.280452	0.526425	0.870415	0.201538	0.234443	1.32892	0.38952	1.12972	0.375787	0.147359	0.880826	0.595746
AC007128.1	0	0	0.0553316	0.0178283	0	0	0	0.0127647	0.0247482	0	0.0103015	0.00939326	0.0115002	0.0704541	0	0.0152449	0.0219297	0	0	0.0367758	0.0115864	0	0.0136451	0	0.0693099	0	0.0152502	0.0386663	0.00793842	0.0120168	0	0.0100106	0.0462719	0.03267	0.0697207	0.0186773	0.0103754	0.00943977	0.0425256	0.0370796	0	0.204866	0.471586	1.09738	0.105301	0.102454	0.167399	0.893883	0.730906
AC005332.4	0.54537	0.802032	0.383526	0.477826	0.384763	0.293699	0.73998	0.766802	0.720468	0.882753	0.98062	0.503507	0.605815	0.578782	0.602106	0.626967	0.547215	0.941789	0.421211	0.169939	0.64248	0.574592	0.580089	0.544875	1.04624	0.603827	0.303022	0.437754	0.34482	0.633032	0.38998	0.397822	0.598696	0.332125	0.346339	0.604148	0.393141	0.410034	0.697606	0.628256	0.573643	0.408964	0.382684	0.523453	0.413603	0.923199	0.3713	0.739806	0.825605
NALT1	3.56886	4.65463	0.486889	0.212547	0.313619	0.515464	3.08617	3.71751	0.611164	2.63965	1.57903	0.943876	0.313379	0.573296	0.254279	0.155783	0.859028	7.01769	1.69357	0.469753	1.06558	4.6893	1.27816	3.38342	0.314782	1.42053	0.116878	0.230488	0.365043	1.00284	0.435556	0.136394	0.315227	0.315299	0.474973	2.16306	0.600798	1.28617	0.452665	0.56836	0.727858	0.055826	1.39085	0.422028	0.448354	0.0872461	0.513182	0.704391	0.322732
AL021578.1	0	0.203112	0.0482037	0.116488	0.0627739	0.0395504	0.110137	0.166805	0.226381	0.141303	0.376929	0.073649	0.210393	0.0204594	0.425678	0.0199215	0.171942	0.0578981	0.151601	0	0.181689	0.0994838	0	0	0.0905721	0.0363315	0.119571	0.075792	0.165979	0.408284	0.267354	0	0.0907001	0.0853842	0.0683317	0.536953	0.108466	0.0246712	0.583498	0.193818	0.0531876	0.299838	0.721468	0.370071	1.44485	0.22314	0	0.348686	0.849001
AC022211.4	0.502102	0.180008	0.512647	0.371654	0.482156	0.841237	1.56175	0.236529	0.630552	0.25046	1.71799	0.870286	0.692569	0.616493	1.88629	0.247176	1.42225	0.102624	0.115163	0.170364	0.912455	0.646562	0.379265	0.415616	0.909721	0.25759	0.388555	0.716487	0.551621	1.67004	1.18471	0.463741	0.696653	0.504478	0.403727	1.16805	0.240319	0.174919	1.13275	1.37417	0.329962	0.949042	1.22552	2.78779	3.53661	0.909686	0.155095	0.80346	1.00324
AL049840.5	1.09569	0.746352	1.17464	1.18951	1.35972	1.05556	1.15022	1.66461	1.12582	0.874493	1.3434	1.82319	1.04631	1.25827	2.14047	1.04026	1.66267	1.3101	0.703668	1.25473	1.72178	1.92401	1.15869	1.20496	1.96185	1.13829	0.670621	1.37786	1.61303	2.51462	2.05531	0.819705	1.85938	0.858687	1.13651	1.07622	1.38449	1.00199	2.09574	1.49937	0.864058	1.39172	1.43019	0.429428	0.878215	2.17501	0	2.79183	0.985174
AC090181.2	0.332078	0.214296	0.635723	0.393284	0.860992	0.542464	0.542273	0.985538	0.614174	0.0496945	1.36348	0.75114	1.1416	0.431718	1.08536	0.315276	0.967518	0.183258	0.913991	0.684497	1.05431	0.419845	0.677259	1.06024	0.796325	0.268323	0.609746	0.613065	0.612912	1.15975	1.33985	0.772901	0.414674	0.330313	0.696909	1.03003	0.171657	0.728829	0.762202	1.77224	0.869799	0.293751	0.824625	0.683283	0.725906	0.211884	0.184637	0.47825	1.6422
AC104794.3	2.02998	2.54974	0.587	0.809085	0.556805	1.4092	3.27848	2.22686	1.23981	3.76009	1.34787	1.77157	0.935354	0.885845	0.847949	0.655903	0.90474	3.44692	0.800963	0.899503	1.55695	3.39509	1.10981	2.35682	0.857842	1.29451	0.52131	0.717854	0.683093	1.13319	0.602907	0.177	0.940869	0.590484	0.770471	1.2439	0.929479	0.97919	1.22812	1.07812	1.22341	0.425016	2.72518	0.417272	0.217218	1.32845	0.315715	0.849224	0.382914
AC012467.1	0.261511	0.281263	0.200253	0.19357	0.289757	1.09536	0.610058	0.461971	0.358268	0.130448	0.521958	1.01987	0.166483	0.339978	0.294732	0.606906	0.158733	0.0801753	1.31957	0.332742	0.419327	0.183682	0	0	0.41807	1.60994	0.331155	0.629725	0.287303	0.608868	0.462778	0.217378	0.669858	0.472948	0.504658	0.47317	0.300399	0.136655	1.00039	0.894641	0.0736523	0.11863	1.4986	0	0.762201	0.0617994	0	2.02797	0.195944
AC018809.2	0.350232	0.257401	0.558731	0.622177	0.457911	0.557451	0.599153	0.748627	0.455825	0.393084	0.654101	0.778545	0.607577	0.576738	0.914444	0.598522	0.659015	0.552985	0.763133	0.436716	0.831151	0.479698	0.31746	0.615013	0.694283	0.67379	0.569163	0.562244	0.723374	0.774662	0.632177	0.533732	0.684051	0.464495	0.658973	0.561276	0.432486	0.562779	0.659586	0.551153	0.503063	0.293923	0.802806	0.583373	0.586952	0.297956	0.210959	0.646661	0.61669
AC092171.5	1.01865	0.91724	0.852597	0.701399	0.677207	1.33955	0.911848	0.778386	0.681547	0.85082	0.851091	0.49889	0.950118	0.646752	0.694175	0.779689	0.733341	0.348618	0.70092	1.24789	1.00282	0.449261	1.28837	0.756352	0.977095	0.929731	0.884956	0.817647	1.01501	0.945528	1.00612	0.354451	1.04674	1.00682	0.651448	0.808279	1.04087	1.09556	0.794692	1.09408	0.900716	0.644785	2.4662	1.53195	1.50175	0.167947	3.29289	1.41718	0.319502
AC139887.2	0.410891	0.563836	0.607581	0.597792	0.244904	0.445099	0.842848	0.630744	0.596887	0.402857	0.872629	0.53046	0.487081	0.524969	0.846334	0.493232	0.490209	0.508235	0.409468	0.227152	0.627047	0.821031	0.385285	0.497608	1.11443	0.915876	0.466491	0.602759	0.625754	1.06034	0.707066	0.518212	0.939077	0.435613	0.379375	0.87896	0.415027	0.410921	1.06317	0.901571	0.610542	0.260309	1.78626	1.79085	0.743327	0.431928	0.433282	1.19293	0.955463
AP003352.1	0.605854	0.760216	0.747449	0.813855	0.484822	0.620319	0.745933	0.618377	0.945296	0.721957	1.07488	1.12888	0.674971	0.692832	0.910425	0.873453	1.51184	0.650109	0.710238	0.411134	0.885119	0.661959	0.775437	0.823888	0.710278	0.88065	0.774305	0.936584	1.06497	0.839637	0.655195	0.568893	1.27169	0.689885	0.820038	0.922211	0.695947	0.721134	1.1093	1.58903	0.900565	0.641284	2.23957	5.73834	4.36551	1.24083	0.717383	1.54123	3.55596
AC024075.3	1.0467	0.765514	0.801512	0.898725	0.835022	1.10481	1.46505	1.46444	1.24755	0.689196	1.11023	1.37156	1.27939	0.979748	1.22685	1.05999	1.21984	1.50182	0.691409	0.735153	1.61122	1.32334	0.616691	1.24763	0.803197	1.40152	0.874797	1.0418	1.15913	1.50397	1.68927	0.765651	1.72931	0.946489	1.03015	0.973988	0.432845	0.853263	1.66323	2.49224	0.849005	0.797694	1.15964	0.246136	0.366085	0.712374	0	1.02041	0.84701
AC023157.2	1.06876	1.00005	1.66136	1.06797	1.16525	1.24896	1.12194	1.35936	1.03225	1.08757	0.786223	1.25875	1.29614	0.625247	1.74656	0.987623	1.94616	0.904352	1.39725	1.36258	2.70426	1.26114	1.98593	2.22935	1.86578	1.02395	0.832329	1.99024	1.06379	0.693183	2.05396	0.986115	1.07793	1.01476	0.665143	1.08568	0.755026	1.36551	0.868007	1.67822	1.50804	0.465431	0.653284	0.942459	1.4952	0.46977	0.415964	1.01824	1.17717
AC100814.2	0.788032	0.577876	1.17944	0.768893	0.523888	0.49511	0.752046	0.721357	0.404849	1.23287	1.47072	0.949911	0.820923	0.488957	0.888139	0.680146	1.63065	0.362397	0.739408	0.76568	0.861538	0.830256	0.446433	1.48672	0.721524	0.744241	0.544307	0.603781	0.991678	1.07226	1.17901	0.565719	0.65373	0.421073	0.414743	0.305537	0.987507	0.44923	0.695666	0.404383	0.696091	0.779951	2.60003	0.631735	3.915	0.558674	0.398318	1.46823	0.885682
TNFRSF10A-AS1	1.22613	1.20571	2.25339	1.55585	2.07279	2.81733	1.5119	1.78232	1.97976	0.52425	2.30743	1.83074	1.73958	2.09502	3.75086	1.79603	3.44479	0.257769	1.832	1.39072	1.88743	1.10729	1.46863	1.45405	1.54574	1.65796	1.17559	1.49034	1.87049	2.20225	1.41347	1.68898	2.55745	1.9007	1.5211	1.87443	0.814897	1.07093	2.19576	2.51679	1.83518	2.62216	6.123	1.13273	6.96869	2.50845	0.97391	3.41527	2.6774
HNF1A-AS1	2.76994	0.988903	2.12108	3.11183	2.20669	4.20001	3.04876	1.74072	2.34105	1.87786	4.08586	3.77071	2.34689	2.00351	2.52874	2.54012	3.83297	0.265935	2.88877	3.33752	3.67747	1.30382	2.81738	1.87706	4.88675	5.09973	2.94742	4.12644	4.81817	3.96412	3.57962	1.55261	4.42707	4.78986	3.32272	1.38113	4.48878	2.93269	3.79808	4.58768	0.684037	1.75102	4.42395	1.07087	2.30063	0.299276	0.707353	0.871255	1.46885
AC010536.2	0	0.0710092	0.353898	0.244348	0	0.165925	0	0	0.474865	0.197602	1.18599	0.720947	0.126093	0.0858326	0.669688	0.0417881	0.120224	0	0.0454291	0.0504035	1.07983	0.347801	0	0	0.189987	0.0762101	0	0	0.261122	1.11995	0.490709	0.109761	0.317093	0	0.28667	0.15359	0.227521	0.0517512	0.641124	0.609838	0	0.0898502	1.00892	0.582206	2.30915	0.14042	0	0.511991	1.18726
AC105460.1	0	0.028917	0	0.0199011	0	0	0	0	0	0	0.0229985	0.0209707	0	0	0	0	0	0.123644	0	0.0205257	0	0	0	0	0.0515788	0	0	0	0	0	0	0	0	0	0	0.0416976	0.0463266	0.0632237	0	0	0	0	0	87.3285	0	0.552769	2.31708	0	0.181308
AL160006.1	0.672222	0.472508	1.3943	1.10093	0.767114	1.03758	1.3953	1.44184	1.21825	1.18022	1.73863	1.86195	1.30912	1.50356	1.04993	1.17591	1.31083	1.74773	2.66965	1.17186	1.75178	1.92396	0.545748	1.70685	1.18805	1.19752	1.23665	1.3893	1.31189	1.23589	1.29824	0.910762	1.7185	1.14872	1.19126	0.882465	1.48204	1.61808	1.31302	2.0154	0.925755	1.05529	2.94222	1.38472	1.41159	0.949388	0.338443	2.27516	1.7371
AC008035.1	1.94266	1.33935	0.534007	1.43795	1.45706	1.25184	1.22012	0.63356	1.12599	0.596334	0.38348	1.08786	1.95023	1.03612	0.505255	0.819718	1.17916	0.274887	0.651218	1.1028	0.862615	0.629768	1.97534	0.742171	0.764472	1.55244	1.13539	1.15949	0.820865	0.894663	1.05778	0.45546	1.14833	1.57649	1.47793	0.463514	1.41617	0.507577	0.439732	1.3803	0.757567	1.05073	0.380596	0.732089	1.19774	0.600337	1.38478	0.386279	0.447873
AC090425.2	0.478192	0.51431	0.97647	0.471941	0.847746	1.00147	0.557767	0.675797	0.655119	0.477067	2.31792	0.870286	0.913277	0.828898	2.15576	1.51333	0.580511	0.293212	1.42582	0.121688	0.153354	0.503815	0.541807	1.52675	0.611577	0.919964	0.403694	1.02355	0.735495	1.11336	1.01547	0.529989	1.07177	0.43241	0.807453	0.741622	0.961277	0.999537	1.82928	0.981549	1.07743	1.08462	2.58805	0.468537	0.348435	0.565023	0.443129	1.41268	1.79149
DCST1-AS1	1.33025	1.57672	2.12044	1.28607	1.17313	2.08092	0.633312	0.230199	1.67366	0.934402	1.90423	1.39754	2.1258	0.847049	1.37685	0.687317	1.03814	0.174786	2.01745	1.11918	1.20146	1.17271	1.72253	0.982338	1.38014	1.22214	1.06571	1.35104	1.53899	1.38154	0.980054	1.69248	1.22563	0.957404	1.37522	2.16833	0.701662	0.893746	1.17433	1.6996	1.55978	1.18226	2.35951	0.957594	1.4836	0.365684	7.62268	1.14286	0.732289
MIR3936HG	1.53093	0.52085	1.25605	1.48586	1.00738	1.75687	1.61258	1.01003	1.18779	0.724701	1.84407	1.99828	0.909974	1.13731	1.68139	1.30516	1.89169	0.42386	0.704064	1.07334	2.555	0.485534	1.34519	1.40485	1.65578	1.59585	1.09295	1.91222	1.69393	1.73804	2.65389	0.629791	1.8757	1.568	1.42442	1.04784	1.1036	0.838778	1.66178	2.73359	0.501568	0.372043	1.20853	1.28573	0.717114	0.188275	0.19543	0.692247	0.77253
AC005911.1	1.12557	0.105268	0.412216	0.253565	0.357875	0.245976	0	0.466834	0.653683	0.36617	0.502336	0.343534	0.46732	0.41354	0.551546	0.216821	0.445567	0.0900213	0.20204	0.336244	0.659152	0.2578	1.10896	0.416657	0.328589	0.338934	0.247882	0.667778	0.322585	0.244158	0.207844	0.081358	0.329053	0.486777	0.389561	0.531279	0.210806	0.575391	1.03684	0.803607	0.537533	0.432897	0.14022	2.44543	0.106976	0.797971	0.952339	0.271073	0.990035
PSMA3-AS1	2.84932	2.83452	3.64414	3.51137	2.56103	3.90208	3.99448	3.28823	3.26189	3.2633	4.53967	3.87159	3.06603	2.51584	4.62682	3.21797	4.95263	3.05006	2.5989	2.64203	4.71756	3.88418	3.04067	4.41716	4.62542	4.20683	3.10657	3.79567	3.78618	4.20459	3.55941	2.35845	3.89131	2.84344	2.63738	4.15037	2.83621	2.47894	4.57867	5.82385	2.6314	2.39585	3.21901	3.93093	4.115	2.32323	0.770347	4.62471	2.22069
AC004918.1	1.15925	0.623406	0.998663	1.33002	1.25235	1.82086	1.41977	0.95226	1.34002	0.910765	1.83451	1.67276	0.857927	0.847737	1.07788	1.08226	1.31934	0.959604	0.897373	0.774381	1.44989	1.52671	0.72241	1.2029	1.55674	2.10756	0.880787	1.09334	1.08891	1.79294	1.23087	0.722713	1.69813	1.10068	0.901831	1.3484	0.749047	0.817803	1.6374	2.32002	0.73461	0.946577	2.87869	1.53339	4.24457	0.965675	1.85309	1.509	1.95436
AC087222.1	0.0442771	0.0476213	0.169526	0.0655474	0	0.0556374	0.10329	0	0.181978	0.198778	0.265122	0.241746	0.169125	0.115125	0.0998035	0.112098	0	0.0814479	0.0913991	0.0338023	0.0851966	0.093299	0	0	0.254824	0.0511091	0.0560686	0.14216	0.116745	0.265085	0.329087	0.0736096	0.0425307	0.040038	0.0320418	0.206006	0.0762918	0.208237	0.390873	0.454421	0.112232	0.18077	0.253731	0.130149	0.38715	0.156951	0.246183	0.147154	0.398109
AL590560.3	0.0609717	0.229519	0.0933783	0.361048	0.304007	0.881077	0.177795	0.775505	0.438536	0.501833	1.01702	0.42801	0.4949	0.217982	0.0687172	0.443798	0.111027	1.28981	0.587351	0.325832	0.0879899	1.1563	0.138166	0.713782	0.5556	0.738988	0.115814	0.562814	0.241146	0.912589	0.323692	0.0760231	0.878502	0.137836	0.463293	0.307321	0.525288	0.501817	1.10341	0.281592	0.154549	0.331906	2.18375	0	1.06625	0.475484	0.169503	0.911872	0.205581
ZNF433-AS1	0.640296	0.615309	0.249506	0.398225	0.226689	0.590342	0.38889	0.297167	0.436005	0.351523	0.414832	0.366436	0.246022	0.256128	0.328792	0.290161	0.317359	0.449526	0.250269	0.205362	0.349928	0.471025	0.532302	0.42741	0.316172	0.507308	0.343037	0.334523	0.452036	0.378051	0.213208	0.223603	0.494944	0.349452	0.329013	0.370181	0.264392	0.344492	0.374601	0.408284	0.326521	0.128902	1.08195	0.367511	1.02696	0.209509	1.02168	0.558235	0.928291
AC093110.1	0.505532	0.71848	0.898653	0.681566	0.864207	0.862109	1.22143	1.9328	0.575085	1.16179	1.59073	1.90111	0.91377	0.598537	1.79065	0.834206	1.11781	1.21223	0.857199	0.303236	1.85861	1.06524	0.306849	0.922309	1.66254	0.68774	0.743045	1.01444	1.11871	2.61225	1.8595	0.525273	1.09258	0.587742	0.548755	1.00803	0.746623	0.650993	1.99231	3.6689	0.366116	0.429987	2.12099	0.477635	2.4864	0.294397	0	0.860065	1.62336
AC015726.1	0.735329	0.550169	1.64027	1.06491	0.701394	1.12486	1.37977	0.779394	1.11689	0.765495	1.31269	1.59594	1.49596	0.644237	1.0089	1.07248	1.16435	0.882158	2.15587	1.04952	2.03007	1.38104	0.470912	1.73528	1.25733	0.9226	0.769216	0.84685	0.990494	1.91408	1.12021	0.744111	1.19768	0.809478	0.763494	0.718956	0.743681	0.977341	1.04427	1.87029	0.891425	0.804918	1.67942	0.375904	0.698866	0.657304	0.799918	0.637526	0.57492
AC104113.1	0.652232	0.30064	1.03457	0.586232	0.712354	0.526871	0.380384	0.790076	1.00525	0.55774	1.71361	1.09013	0.622833	0.575383	1.47017	0.707693	0.678676	0.428494	0.577016	0.391232	0.717145	0.638095	0.475071	0.594976	1.20656	0.860426	0.707939	0.972268	0.798449	0.836762	0.692525	1.08432	0.581756	0.674042	1.11257	0.614148	0.762599	0.58428	0.658037	0.669393	0.393632	0.443811	1.73533	0.410826	0.814712	0.627541	0.259032	0.516114	0.837775
AC006547.1	1.03359	0.846974	0.572874	0.590187	0.536619	0.964807	1.35485	1.05379	0.970975	0.766001	0.656782	0.821532	0.7802	0.627067	0.754404	0.579429	0.681146	0.923483	0.880527	0.473441	1.11751	1.02674	0.658039	0.838093	1.04807	0.999908	0.498607	0.81383	0.596961	1.16885	0.386717	0.621867	1.06846	0.42726	0.605501	0.847288	0.525798	0.540111	0.773401	1.43458	0.723592	0.549247	0.808536	0.810174	0.796159	0.830461	0.437851	0.796072	1.32762
AL445222.2	0.0710689	0.191092	0.108842	0.184117	0.094494	0.0446517	0.248686	0.263647	0.182557	0.159529	0.486338	0.110864	0.305395	0.161688	0.160194	0.134946	0.129413	0.196097	0.317859	0	0.273497	0.336946	0.24157	0.264723	0.443101	0.082035	0.224989	0.199658	0.163964	0.283658	0.0377297	0.147688	0.273063	0.160662	0.0514301	0.16533	0.0918417	0.16712	0.219586	0.0729389	0.0900716	0.120897	0.441201	0.835607	0.854442	0.100768	0.197574	0.433026	0.798755
AL035071.1	1.01578	0.450514	2.14104	1.41073	2.26258	1.71063	2.8582	1.9424	1.60321	1.8335	3.24267	2.01746	1.65998	1.49073	3.11578	2.14086	3.26078	2.05152	1.9383	2.00663	2.42804	1.52256	0.605115	4.21272	1.24554	1.34174	1.45868	2.08457	1.13206	2.07938	1.97915	1.20995	1.45854	1.26889	1.34133	1.77024	1.44349	2.19983	1.9321	1.96678	1.68111	1.6959	4.83077	2.86267	6.47817	1.59617	1.83407	2.52903	4.44889
MALAT1	2.28127	2.31101	6.40784	5.97136	7.93715	5.20148	11.1163	7.87259	6.2777	4.47806	16.4113	9.99611	6.39902	5.07162	11.8298	5.92401	12.7082	5.4436	5.68601	4.63514	12.8327	6.83454	1.31403	7.96441	7.99975	6.0374	5.79535	6.66157	7.89176	11.9055	12.9797	4.46844	9.01979	6.47208	6.52787	10.2364	4.48193	3.10878	13.7214	33.5079	4.0725	4.47822	22.4113	105.904	269.128	6.2126	6.16483	11.0945	104.793
AL512413.1	0.467343	0	0.402602	0.562129	0.621385	0.293625	0.408834	0.371512	1.08043	0.349683	0.349794	1.27581	0.502063	0.531623	0.987585	0.739496	0.744634	0.05373	1.76864	1.24874	0.899248	0.184644	0.529515	1.05691	0.61638	0.472024	0.776741	0.750248	1.19373	0.233164	0.496215	0.437033	0.729479	0.52825	0.803226	0.181199	0.301972	1.05318	0.412565	0.779415	0.246793	0.159002	0.390559	1.54544	0.383096	0.165661	0.162403	0.84132	1.83839
AC018645.3	1.89116	2.44079	3.58418	2.65967	2.38878	3.74279	3.74996	6.26401	2.91473	3.53757	4.12511	3.54015	2.21225	2.08981	5.91463	2.00494	4.39073	4.305	2.30976	2.27392	3.77536	4.73216	1.76776	5.58515	3.21985	3.1653	4.01128	2.31492	2.83602	3.16081	2.76098	2.0043	3.08816	2.39413	3.52405	3.7762	3.50296	3.48355	4.29894	2.18353	2.43677	3.9892	8.71501	3.89124	6.20096	2.98313	0.262873	9.68971	2.33805
AL731567.1	0.289814	0.0519505	0.221925	0.214519	0.224781	0.121391	0.845102	0.0511968	0.446672	0.0722829	0.371859	0.301398	0.461251	0.345374	0.272191	0.244578	0.879561	0.0888522	0.0997081	0.184376	0.325296	0.305342	0.164184	0.154217	0.555979	0.278777	0.336412	0.581564	0.477594	0.481974	0.512862	0.281055	0.556765	0.218389	0.139819	0.374557	0.291296	0.151445	0.596969	1.14018	0.204058	0.197204	0.184531	0.141981	0.422345	1.50673	0	2.08691	0.108575
AC124016.3	0.268459	0.288735	0.385449	0.298068	0.401564	0.126502	0.50884	0.569092	0.758559	0.602611	0.487984	0.549654	0.480672	0.28357	0.869866	0.59471	1.34434	0.648154	0.992882	0.486754	0.58113	0.424265	0.228129	1.14283	0.450636	0.309883	0.382447	0.511776	0.331802	0.401814	0.463196	0.362624	0.547974	0.212412	0.485686	0.624524	0.318016	0.710197	0.533233	0.654366	0.482007	0.593687	0.801255	0.295918	0.513483	0.261695	0.0932903	0.743515	0.60345
AGBL5-IT1	0.724106	0.991196	0.604893	0.341078	0.568915	1.24076	1.68921	1.67454	0.608739	0.689566	1.35142	0.667476	0.377165	0.171159	1.33542	0.583307	0.958956	1.57418	0.770017	0.703567	1.07664	1.3871	0.29834	1.26103	1.32599	0.759853	0.208397	0.634059	0.65088	1.05096	0.559156	0.711343	0.695546	0.416678	0.285824	1.17405	0.623837	0.773978	0.813569	0.810719	0.166858	0.35834	0.880199	0.580488	0.575585	0.513354	0	0.948036	0.14797
FLNB-AS1	0.288798	0.252371	0.539046	0.476522	0.579983	0.385576	0.800033	0.72062	0.704752	0.504207	1.23519	0.896331	0.758397	0.543622	2.72594	0.651191	1.43523	0.59765	0.331195	0.496071	1.29083	0.494442	0.177242	0.390595	0.738708	0.437535	0.693322	1.38603	0.900282	1.56092	2.54255	0.530132	0.91891	0.549499	0.761954	1.57696	0.513165	0.320693	1.12602	2.13652	0.376185	0.458529	0.683821	0.548247	0.868034	0.209008	0.167264	0.599883	0.919655
AL450263.1	0.240693	0.22189	0.315961	0.381771	0.160014	0.302448	0.561491	0.692458	0.31797	0.154367	1.14709	0.429109	0.426853	0.290561	0.813806	0.261159	0.375677	0.379504	0.402212	0.157501	0.893186	0.61586	0.0779178	0.0365939	0.890509	0.476284	0.348334	0.634792	0.679964	1.16654	0.511124	0.571637	0.990853	0.248741	0.423011	0.47994	0.26661	0.188664	1.0624	1.69389	0.290524	0.23397	0.689647	0.202142	0.826794	0.292523	0	0.914214	0.463745
AP006621.4	0.209733	0.0451149	0.160604	0.186293	0.334637	0.210836	0.146781	0.0889207	0.4741	0.125544	0.394693	0.458045	0.20028	0.163598	0.330927	0.132748	0.381915	0	0.40408	0.288209	0.6457	0.0883885	0.0475269	0	0.362118	0.387353	0.239029	0.336695	0.331802	0.125567	0.578995	0.139471	0.201461	0.303446	0.242843	0.390327	0	0.197277	0.370301	1.42066	0.21265	0.171256	0.480753	0.616496	0.916933	0.237904	0	0.278818	0.377156
USP46-AS1	1.78866	2.26728	1.32075	1.27667	1.13248	1.52514	1.24185	1.48959	1.37838	1.84818	1.27501	1.49477	1.5657	1.85474	1.34392	1.05124	2.24892	2.09557	1.49448	1.00788	1.43403	1.79476	2.09899	1.08776	1.57271	1.86802	1.22687	1.84591	1.36151	1.10486	1.15306	1.1682	1.22722	1.09753	1.27898	1.40352	1.24746	1.46878	1.93616	1.72645	1.49329	0.869352	2.37945	1.43959	1.3964	1.1322	0.71036	1.8164	0.957286
AC087277.2	0.738928	0.317895	1.58434	1.42207	3.53695	1.11422	3.27519	0.783209	1.51849	1.10578	5.30946	3.91917	2.39912	1.15277	1.16592	1.12247	2.69111	0.135926	0.406756	1.80518	1.84837	0.934226	0.334892	1.41553	1.55932	0.511768	2.33929	0.830365	2.24058	2.06451	5.17821	2.4569	1.84544	1.60364	2.032	1.03139	0.254643	1.04256	1.56556	6.52199	1.12381	0.603365	0.282297	0.86881	1.61526	0.104772	0	0.818605	0
AL136084.3	1.42332	3.28033	0.58388	0.790152	0.405528	0.191626	1.95663	3.01723	0.417844	2.96673	1.43492	0.753323	0.388333	0.759981	0.916646	0.707827	0.185129	9.02346	1.71389	0.776145	0.537961	3.26695	0.518358	3.30004	0.341313	0.586765	0.386222	0.571231	0.335077	2.89118	0.377812	0.253526	0.488279	0.183865	0.662148	2.16799	0.613115	1.63364	0.942369	0.573874	0.944897	0.93391	0.0970997	0.896517	0.111118	2.99114	0.42395	0.844711	0.799846
AL031985.3	0.464719	0.343013	0.495412	0.553071	0.284717	0.492353	0.41451	0.376669	0.496222	0.490898	0.63915	0.525938	0.382863	0.444234	0.605912	0.44409	0.481191	0.410665	0.219447	0.166955	0.3682	0.49922	0.464596	0.484881	0.585606	0.4628	0.444245	0.59244	0.432467	0.600095	0.503104	0.355995	0.568928	0.304871	0.520938	0.59354	0.455321	0.371408	0.450469	0.39278	0.500439	1.01066	1.72317	0.508905	2.25081	0.549103	0.177324	0.676343	0.327721
ZNF213-AS1	1.28744	1.01104	0.850238	0.821863	1.05968	1.67768	0.913721	0.758106	1.6588	1.03976	1.4101	0.92448	1.06029	0.801445	0.967326	1.32362	1.55051	1.1528	1.19522	0.618843	1.4549	1.48561	0.957038	1.5514	1.69229	1.54114	1.13862	1.12634	1.54463	1.6313	0.759431	0.849342	1.84518	0.880835	0.773933	1.20963	1.01527	1.14797	1.36505	1.78273	0.811524	0.857499	2.69345	1.40161	2.90362	0.593998	1.34454	1.62247	2.49584
FAM222A-AS1	0.146263	0.112365	0.0800011	0.0309325	0.0277819	0	0.170603	0.199322	0	0.0312684	0.0536201	0.032595	0.099765	0.0814928	0.164844	0.0396752	0	0.172962	0.0575095	0	0.0603077	0.132086	0.21307	0.111187	0.120254	0	0.0926077	0.10063	0.0550932	0.0625483	0.0665569	0.0173686	0.100353	0.0377886	0.0756042	0.145825	0.0900072	0.0818909	0.0368914	0.0643337	0.105927	0.810418	1.03773	1.47405	2.05537	0.0592533	0.406616	0.115739	0
ZNF460-AS1	0.483808	0.585393	0.370476	0.313348	0.221126	0.227978	0.211619	0.2564	0.590318	0.678754	0.569042	0.542455	0.519751	0.157244	0.272634	0.44019	0.880992	0.584041	0.582576	0.207761	0.494556	0.477873	0.137042	0.611436	0.580087	0.663172	0.191454	0.509696	0.617895	0.362068	0.288954	0.175945	0.755179	0.437488	0.437644	0.375166	0.286559	0.260719	0.560569	0.713773	0.255488	0.246905	2.54143	2.22206	1.32197	0.235809	0.33625	0.535975	0.407819
MIR100HG	3.20766	7.42257	0.427386	0.394555	0.485694	0.618586	3.44154	2.44605	0.289957	3.6271	1.78899	0.880435	0.491051	0.96202	1.02835	0.523933	0.610935	5.37851	1.36355	0.667858	0.461548	3.87837	2.4016	3.85758	0.448135	1.18715	0.397058	0.226513	0.431975	1.57062	0.609252	0.255426	0.45178	0.306217	0.71703	2.07888	0.723963	0.892168	1.25945	0.537413	1.07826	0.198423	0.404286	0.442401	0.51406	1.48492	0.0871688	0.705148	0.281927
AC022150.4	0.14104	0.117983	0.168002	0.150796	0.213574	0.167381	0.118813	0.298983	0.136867	0.152434	0.442366	0.128343	0.112236	0.198639	0.247266	0.158701	0.15695	0.374752	0.129396	0.0837462	0.211077	0.354982	0.159803	0.108407	0.375794	0.0904459	0.203406	0.182392	0.160115	0.398745	0.524135	0.234476	0.135477	0.2905	0.124747	0.370637	0.108009	0.06756	0.345857	0.241251	0.0860656	0.0639804	0.950421	0.529736	1.02769	0.34441	0.0871321	0.624991	0.387486
AC092535.5	1.01179	0.785931	0.301304	0.457676	0.411061	0.98886	1.57355	0.774528	1.03961	0.588823	1.00973	0.569961	0.590448	0.474998	0.190054	0.604822	0.511785	0.827199	0.50281	0.514953	0.216318	1.53979	0.254754	0.717868	0.754844	1.03815	1.13888	0.496307	0.481684	1.34613	1.0743	0.327072	1.56581	0.813265	0.813555	1.04612	0.338989	0.308421	1.14131	1.03841	1.13985	0.726723	1.44952	4.79159	2.70322	2.03237	0.937603	2.05497	1.38987
AC087588.2	0.419073	0.225363	0.601698	0.387745	0.487553	0.460772	0.366607	0.444186	0.538244	0.313565	0.896186	0.53116	0.250115	0.136204	2.36155	0.331558	0.858502	0.0481804	0.108134	0.199957	0.655174	0.275955	0.296764	0.724749	0.301482	0.120934	0.331674	0.420473	0.414363	0.470433	1.00117	0.391894	0.150954	0.0473689	0.379086	0.771798	0.451304	0.205304	0.647418	1.18277	0.575387	0.81983	0.200126	0.461938	1.83214	0.297101	0.436888	0.812455	2.00176
RARA-AS1	2.38117	1.66265	2.67302	2.15933	3.6633	2.92945	2.25392	1.69138	2.69002	1.791	2.20747	2.3629	2.51194	2.86063	2.13568	2.76964	2.45176	1.3645	3.63717	3.44535	2.93857	1.64185	2.42956	2.54743	1.59044	1.95711	2.48644	2.46167	2.56396	1.61717	2.66064	1.88605	2.52675	3.06633	2.80579	1.74012	2.06218	3.09773	2.46525	3.19872	1.84336	1.46757	2.32185	3.73782	1.85313	1.23737	2.53004	1.65733	2.49408
AC027228.2	0.476564	0.523701	0.36493	0.237723	0.199736	0.572801	0.5317	0.494142	0.298058	0.403093	0.770995	0.339387	0.464977	0.377122	0.455371	0.334421	0.132057	0.543137	0.185344	0.213548	0.448528	0.676743	0.375626	0.51821	0.467059	0.478347	0.406693	0.390841	0.273164	0.537555	0.374004	0.396139	0.228884	0.149891	0.337376	0.618592	0.285616	0.389791	0.612767	0.350879	0.551469	1.34646	0.286949	0.33498	0.362346	0.0293791	0.230411	0.642722	0.745208
ADAMTSL4-AS2	0.134229	0.216551	0.591021	0.223551	0.133855	0.168669	0.50884	0.248978	0.31032	0.100435	0.947262	0.444958	0.352493	0.196318	1.32371	0.0849586	0.427745	0.123458	0.323264	0.35866	2.93794	0.176777	0.190108	1.03569	0.386259	0.426089	0.148729	0.457905	0.309682	0.30136	0.78387	0.167365	0.225636	0.273101	0.16999	0.676568	0.173463	0.28934	0.859097	0.861008	0.226827	0.319677	0.192301	0.789115	0.660192	0.618551	0.373161	0.52046	1.2069
NUTM2A-AS1	1.66447	1.29973	1.10995	1.27784	1.28412	2.3412	1.23858	1.30849	1.23164	1.01876	1.08107	1.27285	0.777616	1.17088	1.31791	1.18133	0.670244	0.964678	1.12961	0.989706	1.45721	1.37272	1.9265	0.620516	1.44347	1.55659	1.73239	1.43015	1.28183	1.58285	1.06176	0.885378	0.750914	1.11632	1.29409	1.48519	1.00744	1.21787	0.667114	1.47426	1.05958	1.15697	1.95681	1.33086	1.15348	1.27701	0.715371	0.8913	0.878618
SNHG9	3.60452	4.22524	3.44246	2.66805	1.34624	3.81687	1.32271	2.96198	3.16265	1.75762	2.91008	2.93781	3.6741	2.26405	1.46065	2.4865	1.25373	1.45276	2.34088	2.75179	4.20819	3.883	4.77236	1.93961	2.29203	3.78671	2.61558	4.19359	1.78868	2.54597	1.9351	1.24562	2.83991	3.47916	2.63778	4.55382	1.70971	3.39679	2.39546	3.61623	4.10635	3.27945	2.86241	3.33333	4.60364	4.85243	9.11993	3.49965	5.73538
AL139120.1	0	0	0	0	0	0	0	0	0	0.0932813	0	0	0.0595246	0	0	0	0	0	0	0	0	0	0	0	0	0	0	0	0	0	0	0.0518146	0	0	0.0451091	0	0	0.04886	0	0	0.0526676	0	0.0595346	0	0	0	0	0	0.140117
IQCH-AS1	0.908272	0.688089	0.799583	0.929932	0.416506	0.937207	0.715298	0.667566	0.786786	0.694483	0.862	0.954057	0.693233	0.676589	0.922782	0.639919	0.965793	0.457328	0.4539	0.374537	0.985456	0.880104	0.878867	0.663235	0.826701	1.02546	0.761873	0.949888	1.09691	1.04191	0.478672	0.460159	0.859711	0.860281	0.628499	0.727448	0.873888	0.753513	1.1003	1.12949	0.478937	0.895472	0.971956	0.428727	0.724612	0.37836	0.258031	1.50564	0.827088
AC007406.5	1.07002	0.893417	1.8921	1.81333	1.4976	1.36226	1.98708	1.64153	1.83723	1.65393	2.17383	1.95471	2.03687	1.91732	1.85653	2.16098	2.29457	1.82587	1.70988	1.43493	1.7135	1.7652	0.518448	2.41241	2.05949	1.53579	1.84973	2.1472	1.8283	2.07921	1.84621	1.36928	1.94745	1.32406	1.70151	1.43567	2.04991	1.55054	1.48527	2.14578	1.25502	1.51368	2.33304	1.71748	3.16999	2.16598	0.430548	2.55797	1.62986
NR4A1AS	0.756049	0.393461	0.85908	0.685991	0.583694	0.183877	2.19043	0.336052	0.125296	0.729939	1.29345	0.532634	0.37263	0.348771	0.632198	0.324166	0.399696	0.0897262	0.251722	0.18619	1.83019	1.07921	0.221065	1.16801	0.116968	0.0844557	0.16986	0.234914	0.160764	0.924757	0.284849	0.101364	0.0937069	1.56581	0.22944	0.453889	0.042023	0.36322	0.667431	0.62576	0.576983	1.57655	0.745386	0.286755	2.87887	0.501419	0.542409	0.243166	4.98877
AL139246.5	3.78649	1.06029	2.65931	1.89061	1.89168	2.47754	2.14296	1.02116	3.72945	1.24057	2.39568	1.67766	3.29489	1.55835	2.47465	1.88609	1.06077	0.577004	1.03292	1.26575	3.08247	1.39274	1.87855	1.33531	1.99868	2.92246	1.81581	1.74446	1.55074	1.40847	1.33221	1.35956	2.94845	3.16059	2.02674	1.42467	1.13886	2.93288	4.47008	2.50643	1.55232	1.92095	0.363783	1.1196	0.930559	0.587714	3.11436	3.20193	1.66199
POLH-AS1	0.405739	0.41214	0.448782	0.433804	0.254752	0.538165	0.446965	0.382269	0.277929	0.134928	0.520603	0.421957	0.344401	0.322349	0.685922	0.24254	0.492555	0.0207322	0.217142	0.258127	0.368669	0.261237	0.459715	0.287872	0.345943	0.546403	0.271168	0.379955	0.416037	0.607287	0.33507	0.412214	0.43304	0.244596	0.391493	0.349586	0.291296	0.265029	0.517373	0.161939	0.285682	0.460142	0.32293	0.198773	0.492736	0.303628	0.250659	0.79909	0.760027
NUTM2B-AS1	0.549006	0.514019	0.499155	0.607878	0.665614	0.629051	0.620959	0.460073	0.5641	0.253487	0.50843	0.580387	0.366838	0.632137	0.177272	0.960132	0.862012	0.237869	0.325729	0.562299	0.458347	0.388802	0.562064	0.576232	0.446818	0.551667	0.499864	0.660401	0.673933	0.460284	0.440001	0.458869	0.730738	0.620896	0.611815	0.532447	0.472983	0.324824	0.544737	0.73885	0.532872	0.535143	0.678908	0.662398	0.727332	0.517883	0.197614	0.628309	0.424956
ATP1A1-AS1	1.77036	1.1815	1.22357	0.86017	0.476814	1.49447	0.794217	0.44265	0.7556	0.760823	1.17266	1.31711	0.892966	0.708172	0.603694	1.02284	0.611685	0.743171	1.0245	0.755478	0.821048	0.755654	1.15209	0.879252	1.13209	1.59291	0.822005	1.02751	0.999411	0.860611	0.944685	0.732024	1.34299	0.911263	0.82125	1.04193	0.77434	0.711631	1.18617	2.45054	0.590657	0.642476	1.04919	1.12083	1.58766	0.386183	0.984331	1.07618	1.42853
USP30-AS1	6.46337	10.4639	5.91315	3.65107	7.84746	4.78753	2.65846	0.685069	13.7016	1.47629	4.21931	3.71464	16.8919	8.66805	3.48886	7.38515	3.77863	0.406743	5.54748	12.6215	3.14188	4.30086	3.122	1.44814	2.70828	1.84554	4.5231	4.72379	4.91077	1.79903	4.18984	20.218	5.16281	8.30544	3.37259	0.949638	3.78063	8.4793	3.51357	2.40898	3.42034	6.73589	0.812248	3.29976	2.82572	2.5805	0.851132	1.50743	1.14699
INE1	0.42506	0.304776	1.01264	0.646734	0.706455	0.741832	0.798778	0.500591	0.436746	0.742104	1.91898	1.1788	1.2177	0.491199	1.6767	0.538071	0.774014	0.347511	0.6337	0.414642	1.88568	1.02007	0.347827	0.753951	0.815436	0.572422	0.792436	0.777142	0.700471	1.50804	1.22859	0.569248	1.27025	1.00362	0.717736	0.970518	0.325512	0.481258	1.25079	2.47205	0.419	0.964107	1.69154	1.73532	2.52938	0.518984	1.11603	1.465	1.96401
AC243967.2	0.0787148	0.25398	0.0602759	0.145661	0.497135	0.0494554	0.0918135	0	0	0.0588972	0.0673325	0.0306979	0.0375834	0.0511666	0.133071	0.124553	0.071668	0	0.0541624	0.060093	0.0757303	0.0829325	0.178373	0	0.0755034	0.0454303	0.0996775	0.0947734	0.0259434	0.0785438	0.0417888	0.130862	0.037805	0.284714	0.0569632	0.183117	0	0.0616998	0.0347443	0.121179	0.266032	0.241027	0.563846	0.578441	0.430166	0.0837071	0.109415	0.174405	0
AC002553.2	0.269675	0.362555	0.413009	0.499032	0.717127	1.0166	0.865016	0.214377	0.900542	0.706232	1.49942	1.26205	0.772561	0.525887	1.74762	0.46939	1.4732	0.248035	0.742238	0.514694	0.97294	0.426188	0.229163	0.430504	0.970024	0.544752	0.725673	1.29877	0.933256	1.68181	1.57484	0.224165	0.647597	0.73157	0.975774	0.941031	0.755081	0.369919	1.24985	1.72982	0.398746	0.229376	2.06051	0.198173	3.83173	0.286779	1.49941	0.597507	1.36392
PRKCZ-AS1	0.965209	0.456769	1.25156	0.704918	0.975348	1.21286	1.41104	1.20038	0.859514	0.866644	1.72834	1.36515	0.823389	0.685968	1.14584	1.25441	1.38265	2.21347	1.21317	0.864591	2.15438	0.827101	0.233304	1.05462	1.27147	1.27755	0.920767	1.17762	1.06889	1.60519	1.06583	0.748832	2.02734	0.896075	0.81956	0.898158	1.00895	1.01885	1.64735	2.91898	0.739411	0.744347	2.60579	1.81578	2.16616	0.447065	0.286219	1.1976	3.38462
PTOV1-AS2	0.785301	0.539614	1.13587	0.678156	0.884622	0.603037	1.47575	0.739876	1.6362	0.522302	2.78028	1.39518	1.16652	0.595543	2.01597	0.759375	0.953331	0.722283	0.735481	0.799361	3.31592	1.42493	0.642613	0.580388	1.88316	1.46043	0.5939	1.2957	1.49543	2.02429	1.71395	0.235724	2.05345	1.47941	0.599867	2.402	0.714145	0.444564	1.73314	4.54474	1.05057	1.12809	2.10425	1.73125	4.05315	1.79393	1.15222	2.46494	4.51113
AL157786.1	0.172822	0.294302	0.380474	0.373106	0.354253	0.18097	0.512351	0.389254	0.26636	0.226295	1.10258	0.696453	0.316312	0.299569	0.770989	0.287136	0.812977	0.0927229	1.14952	0.153927	0.568087	0.25795	0.163177	0.321871	0.476592	0.465474	0.296355	0.427719	0.536372	0.941271	0.925138	0.275341	0.69169	0.364644	0.364774	0.424377	0.235744	0.186264	0.95989	1.64067	0.206863	0.171495	1.71938	0.359832	1.35371	0.188888	0	0.239321	0.27517
AC011472.1	2.58846	3.92285	0.540577	0.377387	0.469315	0.29569	2.15003	2.66043	0.282081	2.52368	1.74449	0.64239	0.411965	1.04523	0.839823	0.124116	0.35708	4.90577	1.21437	0.748523	1.81114	2.60319	0.755419	3.13042	0.601904	1.40339	0.471804	0.503681	0.542896	1.05661	0.291493	0.326004	0.640427	0.638356	0.56763	2.06803	0.743342	0.83002	0.48471	1.44904	0.530193	0.587105	1.98525	1.61394	1.1145	1.08437	0.10903	1.47723	2.38026
SERTAD4-AS1	7.46818	8.89284	0.970148	0.493564	1.16734	1.89921	3.44808	9.07009	0.845	8.4152	2.14844	1.64696	0.933896	2.22498	0.726458	1.19579	1.33564	10.9984	2.40114	2.61315	1.30442	7.39999	3.04722	6.76528	0.746197	3.2327	0.858453	0.713632	1.09885	2.2622	0.755195	0.572747	1.3237	0.924542	1.20635	4.25719	1.89575	3.15342	1.13805	0.958085	3.88743	0.952823	0.742996	0.84934	1.02032	0.913941	2.47164	0.763324	1.64874
AC127024.5	0.627929	0.415604	0.332888	0.357531	0.513785	0.546258	1.6902	0.870345	0.545933	0.50598	0.7024	0.489771	0.553501	0.94193	0.653259	0.519728	0.879561	0.755244	0.365596	0.516254	0.836475	0.559794	0.54728	1.02811	0.648643	1.11511	0.611658	0.736648	0.636792	1.10854	0.769294	0.281055	0.974339	0.436778	0.279637	0.561835	0.582592	0.681502	0.980735	0.694024	0.73461	1.08462	3.27543	1.98773	3.062	0.890339	0	1.23074	1.41148
AC087286.2	0.0676232	0.181827	0	0.17519	0.0449562	0.0424867	0.0788762	0.250864	0.0347412	0.303588	0.347069	0.210978	0.0322876	0.0659351	0.11432	0.0856022	0.123139	0.124393	0.0697957	0.0258127	0.0650592	0.356233	0.114929	0.0719681	0.259457	0.351259	0.042816	0.081419	0.156014	0.0337381	0.251303	0.0843165	0.194868	0.0305744	0.122341	0.393284	0	0.0530057	0.179091	0.173506	0.0571363	0	0.096879	0	0	0.599266	0	0.0374574	0.0760027
AC254629.1	7.59867	4.30235	9.88509	5.1267	12.3039	9.03246	5.41976	5.44341	9.23449	4.63997	9.18203	7.89559	8.59064	5.76822	14.4111	6.43474	9.94025	0.618558	1.08777	9.60838	22.7468	3.47839	7.07565	6.3208	9.88577	8.04528	7.57618	12.1915	8.74533	6.8501	15.2645	7.47067	6.69491	7.95319	5.87181	9.36002	7.51715	9.20121	7.14751	22.3381	5.68971	4.50489	3.92066	5.28869	7.88513	0.0309601	2.16101	1.03532	3.57317
AC008870.2	0.196133	0.257825	0.200253	0.19357	0.101415	0.383376	0.355867	0.230985	0.134351	0.293508	0.503317	0.339955	0.312155	0.113326	0.540343	0.16552	0.277783	0.400876	0.164947	0.11646	0.419327	0.482166	0.14815	0.16235	0.35536	0.226398	0.234568	0.314862	0.143651	0.478396	0.20825	0.163034	0.418661	0.157649	0.2681	0.354878	0.131424	0.102492	0.500195	0.894641	0.110478	0.177945	0.790926	0.448404	1.66732	0.339896	0.121168	0.434564	0.930736
PPP1R14B-AS1	0.897111	0.482434	1.31668	0.525697	0.646104	1.31517	0.871998	0.277337	0.883369	0.335625	0.92726	0.816349	0.356948	0.510251	0.631922	0.402201	0.544533	0.44694	1.80042	0.656343	0.719248	0.905797	1.43998	0.676283	0.609528	0.99239	0.686347	1.11013	0.295676	0.48488	0.833466	0.497142	0.430864	0.608416	0.703309	0.840588	0.193221	0.82039	0.791959	1.03581	1.61073	1.29718	1.32093	6.15298	4.57576	2.62352	20.3676	6.04588	2.1846
HNF4A-AS1	0	0	0.0749484	0.0724471	0.0488012	0.122988	0.0570814	0.181546	0.0251417	0	0.0837226	0	0.046732	0.0954324	0.165464	0.0309745	0.0891135	0	11.4658	0.130762	0.0941646	0.02578	0.0277241	0.130205	0.187765	0.056489	0.0774632	0.117843	0.129034	0.195326	0.155883	0.0203395	0.0470076	0.17701	0.0531219	0.0948712	0.0421613	0.153438	0.108004	0.200902	0.0206743	0.0832493	0.0934798	0.143849	0.748829	0	0	0.0542146	0.385014
RHPN1-AS1	0.314141	0.162677	0.258373	0.0516724	0.0928189	0.204681	0.325703	0.209645	0.143457	0.243757	0.388145	0.145199	0.233319	0.189074	0.0786772	0.132554	0.0847461	0.567163	0.0560403	0.133236	0.179099	0.318715	0.105461	0.0990593	0.234364	0.308893	0.0736668	0.168102	0.168727	0.197363	0.13589	0.0483567	0.257047	0.157814	0.286271	0.315776	0.200475	0.173277	0.236236	0.155233	0.127797	0.356262	1.02233	0.649796	0.737563	0.173219	0.452833	0.232009	0.104613
AC093484.4	1.39473	0.868461	1.5177	1.08671	1.51284	0.645686	1.45558	1.01147	1.43307	1.20836	2.00934	1.37414	1.54216	0.858891	2.23376	0.929235	0.534681	0.270064	5.25304	1.06477	2.25995	0.54138	1.66344	1.3281	1.26741	1.10154	1.11547	1.23735	1.01614	1.75794	1.55883	1.46444	1.19869	0.464651	1.27493	1.36615	0.758903	0.63293	1.16645	2.78751	1.6126	1.44854	3.50549	1.72619	5.77668	1.5092	1.02036	1.38247	2.31008
AC016394.3	0.302191	0.775036	0.356005	0.292505	0.29362	0.408935	0.569387	0.344938	0.429922	0.417434	0.934554	0.525798	0.399559	0.256872	0.366778	0.220693	0.465618	0.213801	0.159948	0.177462	0.49201	0.587784	0.553095	0.544258	0.69121	0.375652	0.279642	0.522438	0.520975	0.811824	0.394904	0.598998	0.602872	0.273259	0.353261	0.793124	0.320426	0.182207	0.861875	1.002	0.726703	0.759234	1.68731	1.91319	2.48986	0.642713	0.258492	0.540791	1.20179
LINC02381	2.2495	4.26024	1.07348	1.60474	0.97531	2.15072	3.66956	2.19424	1.62464	3.31752	3.20702	2.08513	1.69669	1.62116	1.43297	1.6095	0.74207	4.16794	3.00595	1.53066	0.909593	4.03592	1.6807	2.37668	1.06322	2.35199	1.83712	1.08598	1.47206	2.06569	1.09038	1.34143	1.86327	1.19395	1.80483	1.22611	1.67118	1.5077	3.48239	1.33837	1.76292	0.6766	0.747292	0.622891	0.320692	8.74815	0.181265	1.17379	0.842747
WARS2-AS1	0.772182	0.549275	1.01053	0.743942	0.564957	0.744412	0.657638	0.428714	0.646484	0.813163	1.17426	1.0548	0.522796	0.799381	0.538742	0.861116	1.10108	0.529844	0.387952	0.318145	0.526715	0.723161	0.810099	0.860929	1.05811	0.905479	0.812266	1.07565	1.18229	0.668586	0.668054	0.448288	0.918326	0.605891	0.724372	0.548092	0.915166	0.637292	0.699707	1.16569	0.4246	0.739495	1.31111	1.76538	1.10744	0.527161	0.817785	1.18133	1.34083
MIR155HG	0.488155	0.795037	0.405845	0.196151	0.509972	0.525773	0.227755	0.310444	1.28977	0.354819	0.369845	0.402507	0.745843	0.271982	0.251505	0.909256	0.86351	0.0513122	0.143954	0.287489	0.442809	0.279197	0.963965	0.534363	1.09702	0.499081	0.43271	0.604536	0.376941	0.431427	0.488694	0.42896	0.656461	0.315299	0.22205	0.281198	0.276367	0.120257	0.0985	0.987683	1.26093	0.389107	0.279738	0.737946	1.03659	1.04812	0.271417	0.432632	0.376213
AL354696.1	0.62861	0.338044	0.309445	0.432059	0.447753	1.12842	0.523725	0.380731	0.738163	0.26877	0.76816	0.490302	0.514522	0.262679	0.354232	0.36945	1.47172	0.412975	0.370746	0.411341	0.863965	0.520372	0.91573	0.621213	0.473757	0.673777	0.540154	0.576649	0.591947	0.582441	0.572094	0.522525	0.733205	0.730834	0.714848	0.522269	0.386832	0.774289	0.396378	0.691231	0.417314	0.244421	3.98822	3.03559	4.51493	0.604813	0.74895	0.646648	1.41301
ZKSCAN2-DT	0.308049	0.1541	0.362062	0.296952	0.280994	0.324072	0.467939	0.303729	0.471097	0.192971	0.74149	0.519657	0.444667	0.237493	0.48444	0.417156	0.795756	0.362397	0.280975	0.213296	0.496246	0.452867	0.137988	0.327842	0.907058	0.520969	0.299369	0.534777	0.472228	0.721986	0.5857	0.297747	0.639967	0.226732	0.378453	0.399976	0.308596	0.224615	0.727287	0.691128	0.278436	0.32173	1.34107	0.737024	1.4877	0.350441	0.0796637	0.563484	0.418686
ZNF529-AS1	1.27825	0.616731	0.539725	0.672036	0.428865	1.54617	0.654909	0.557135	0.515538	0.804476	0.817506	0.726791	0.558983	0.559107	0.538554	0.612459	0.978912	0.648269	0.419222	0.483366	0.701093	0.679664	0.893344	0.800972	0.756287	1.76507	0.393321	0.776705	0.669347	0.894025	0.608846	0.228395	0.642605	0.864203	0.79535	0.565083	0.771903	0.63675	0.822591	0.760157	0.484496	0.463344	2.74975	3.58175	1.38404	0.372649	0.531375	0.357329	0.939862
AC093726.1	2.01606	1.91909	1.33086	1.6295	1.34028	2.06742	2.35154	1.64563	1.47623	2.67019	2.29937	1.6267	1.59326	1.73225	1.38419	1.64271	2.70061	2.94126	1.16399	1.11453	1.64979	2.00201	0.866441	2.81146	1.75598	2.16664	1.1591	1.61823	1.78718	1.75733	1.23023	1.56025	2.02557	1.34109	1.84465	1.86882	1.73689	1.14433	1.90249	1.87884	1.2335	1.00916	1.92551	0.544924	1.72227	1.06785	0.322108	1.77135	0.989693
AL031670.1	0.20014	0.143504	0.178801	0.246905	0.133054	0.419152	0.544705	0.601045	0.411286	0.399339	0.570666	0.41628	0.254826	0.195144	0.45113	0.147789	0.485928	0.368159	0.183618	0.178258	0.449288	0.632592	0.113383	0.1775	0.543929	0.423541	0.1056	0.267745	0.373794	0.565833	0.460426	0.277274	0.512657	0.271468	0.0965564	0.517325	0.25864	0.078439	0.500598	1.30091	0.112735	0.317766	1.3062	0.882446	2.2604	0.307426	0	1.1086	0.899763
MNX1-AS1	2.78678	0.691675	1.70718	0.952043	0.598553	3.09774	0.750119	0.749804	1.14536	0.449112	0.916848	0.986491	0.900702	0.794261	0.507359	1.11258	0.507459	0.157732	0.767015	0.4255	1.05182	0.496878	1.14156	0.661608	1.06923	2.4497	0.814368	1.60022	1.1587	1.47592	0.500743	0.516752	1.44138	1.93844	0.651547	1.014	1.18197	1.54587	0.965129	1.69406	0.597709	6.17014	5.71223	3.90672	3.84249	0.303951	4.70798	2.73104	5.15592
AC025287.3	0.222711	0.383251	0.238758	0.296729	0.384954	0.279853	0.727361	0.377691	0.1373	0.466593	0.457216	0.382162	0.170138	0.434303	0.301203	0.281923	0.243328	0.409678	0.24519	0.0680095	0.38568	0.703933	0.100935	0.0948082	0.555424	0.308491	0.225617	0.357528	0.322972	0.755573	0.283763	0.111076	0.513424	0.241666	0.161168	0.794419	0.230246	0.139656	0.865069	1.09714	0.338712	0.181852	0.638125	0.130929	1.4605	0.410515	0	0.937555	0.400493
AC005104.1	0.151464	0.162904	0.579917	0.485822	0.537034	0.126883	0.765563	0.48162	0.881892	0.528875	1.07968	0.669451	0.43391	0.557912	0.967326	0.415423	0.551616	0.464363	0.451619	0.192719	0.53431	0.744703	0.343226	0.429854	0.774849	0.407948	0.575401	0.810505	0.565765	1.1587	0.85771	0.545577	0.775944	0.319579	0.328827	0.743859	0.26098	0.118723	1.7828	2.43537	0.426584	0.480963	1.54305	1.03884	1.5451	0.859039	0.280715	0.447454	2.49674
SNHG16	3.02148	2.82445	1.88028	2.38435	1.08458	2.58866	1.91748	2.01592	2.31772	2.65314	2.07904	2.35344	1.59764	2.25891	2.9128	1.78859	1.93251	2.40005	1.30011	0.867387	1.60962	2.18364	2.55578	2.08173	2.23154	3.37721	2.01847	2.04443	2.07947	2.43353	1.31242	2.08259	1.97085	2.09619	1.52094	3.25307	1.48082	1.97363	1.76352	1.96481	1.93051	3.30483	4.11004	5.74967	7.62371	4.00089	6.15521	5.9338	8.15761
ACAP2-IT1	0.064683	0.278274	0.173359	0.239391	0.172006	0.325116	0.188617	0.308516	0.0332307	0.290389	0.497968	0.201805	0.123535	0.126137	0.5832	0.163761	0.471139	0.0892385	0.111268	0.0246904	0.217807	0.340744	0.18322	0.068839	0.465331	0.149328	0.409545	0.467274	0.31978	0.839053	0.549432	0.295719	0.279593	0.321696	0.304258	0.275869	0.306494	0.0760517	0.742318	1.19493	0.13663	0.0880271	0.58689	0	0.0706969	0.160499	0.0899102	0.501603	0.218095
AC004477.3	0.189116	0.406799	0.608225	0.55993	0.377175	0.332693	0.352937	0.400897	0.349767	0.283006	0.582369	0.413017	0.541775	0.319617	0.809931	0.430913	0.550993	0.695758	0.442433	0.288752	0.436669	0.318798	0.171419	0.402533	0.29024	0.567571	0.383167	0.425034	0.573437	0.37741	0.321278	0.503041	0.726626	0.273615	0.328456	0.469275	0.325856	0.296473	0.467457	0.46582	0.255661	0.617682	0.288995	0.667069	0.826794	0.40222	0.210298	0.628522	0.34008
AC073487.1	0.126554	0.0453707	0.193817	0.218574	0.168267	0.106016	0.44284	0.134137	0.173378	0.126256	0.324762	0.42774	0.161133	0.137105	0.285261	0.186901	0.307265	0.155197	0.0870796	0.0644097	0.202926	0.444449	0.0477965	0.044895	0.0404635	0.146081	0.240385	0.270883	0.139035	0.631394	0.223953	0.175327	0.526769	0.152583	0.12211	0.392541	0.10903	0.231462	0.14896	0.692712	0.0356427	0.229636	0.725219	0	0.922133	0.149533	0	0.327132	1.32753
AC107068.1	0.46028	0.364171	0.599587	0.528668	0.298962	0.358992	0.45048	0.549546	0.375086	0.435445	0.380146	0.577715	0.429429	0.416119	0.29217	0.438666	0.539498	0.394148	0.334913	0.254455	0.478458	0.523961	0.221792	0.647508	0.345082	0.500768	0.388572	0.41192	0.348741	0.607095	0.280871	0.369409	0.411634	0.35402	0.394346	0.471792	0.319058	0.452019	0.593148	0.646144	0.460423	0.500396	0.924692	0.715357	1.0871	0.408831	0.323574	0.257886	1.3914
AC080162.1	0.363595	0.293293	0	0.23549	0.18129	0.228442	0.159037	0.192692	0.140097	0	0.349896	0.425394	0.217004	0.118173	0.307338	0.115066	0.413806	0.125407	0.156365	0.0346973	0.349809	0.143654	0.102991	0.0483696	0.261571	0.209849	0.115106	0.109443	0.149795	0.181403	0.289543	0.188896	0.218284	0.0821961	0.131561	0.21146	0.117468	0.106875	0.320977	0.559743	0.0384012	0.15463	0.303857	0.26719	0.29805	0.193328	0.12635	0.25175	0.204325
AC093010.2	2.00694	1.82974	3.66394	4.10243	3.26046	2.82249	9.28615	9.016	2.77226	8.27409	8.34494	5.62913	4.2645	3.8273	8.19376	4.66045	7.40592	13.3736	3.84105	3.43974	4.28368	8.97604	1.05414	13.2963	5.02302	3.25248	3.97202	3.70192	4.32799	6.69739	5.43316	2.40847	4.46838	2.29554	4.7418	6.25601	5.45048	4.66728	6.31244	3.683	3.1556	2.04392	8.68276	2.89103	5.8107	6.21895	0.258646	6.97925	3.55524
AL049869.3	0.239953	0	0.122496	0.236816	0.026587	0.0502531	0.279883	0.254332	0.123275	0.179541	0.684185	0.31193	0.190948	0.181971	0.225363	0.050625	0.36412	0.147132	0.165108	0.0610623	0.538662	0.126405	0	0.212809	0.613769	0.276979	0.253213	0.128403	0.448151	0.319243	0.127388	0.0664861	0.230489	0.361633	0.173646	0.310117	0.0344544	0.062695	0.388351	0.779845	0.0337903	0.0816381	0.229176	0.235108	0.524525	0.226819	0	0.974697	0.179791
AP001160.1	0.116683	0.094122	0.156363	0.151145	0.155143	0.0366552	0.20415	0.216432	0.269755	0.218266	0.274479	0.250278	0.111424	0.132732	0.46027	0.184632	0.37183	0.0804897	0.200719	0.111349	0.224518	0.215137	0.0661028	0.155225	0.223845	0.134688	0.147757	0.398048	0.153829	0.465719	0.21681	0.0969915	0.224162	0.237402	0.168879	0.384545	0.0251314	0.182922	0.283268	0.479013	0.0739411	0.396985	0.780098	1.20043	1.33908	0.248167	0.486573	0.42011	1.24585
LINC01578	8.35544	6.10816	6.0466	5.76521	6.70144	8.1395	5.52908	5.04624	6.84688	6.48705	6.09638	6.60417	5.95647	5.59257	5.58485	5.35391	9.40007	4.51966	7.48541	6.15773	6.30755	4.65869	9.05456	8.30681	6.80444	8.02611	5.746	6.04598	6.67739	4.57313	6.34628	5.23309	6.25383	5.09434	5.93579	6.08144	6.19351	5.94627	6.02867	7.90454	6.857	3.6674	6.60932	4.40138	6.41972	3.2433	2.7483	6.69484	4.95574
MIATNB	0.932758	0.79245	0.828302	0.597593	0.71911	0.856898	0.475418	0.839109	0.668466	0.633408	0.891748	0.745872	0.935625	0.55027	0.706723	0.982306	1.15613	0.61279	0.744291	0.849724	1.11608	1.0488	1.01244	0.900928	1.421	0.959064	0.962797	0.811616	0.893857	0.836877	0.982058	0.723221	1.00138	0.907246	0.623954	0.698988	0.641526	0.663549	0.975658	0.884899	0.64903	0.805369	0.823489	1.01376	0.959511	0.555695	0.457604	0.937816	0.86334
MIRLET7BHG	0.206482	0.150845	0.161097	0.152837	0.0828802	0.25946	0.331726	0.425323	0.184138	0.192393	0.22328	0.218787	0.267861	0.207659	0.149287	0.187404	0.212827	0.189912	0.19301	0.121943	0.22489	0.328371	0.176567	0.223895	0.22048	0.188875	0.172669	0.171992	0.274783	0.213808	0.153053	0.148967	0.26944	0.151484	0.157882	0.0966733	0.198028	0.140473	0.206355	0.32387	0.154711	0.33137	0.256743	0.96194	0.204389	0.243054	0.335751	0.228746	0.411593
CCDC183-AS1	0.317993	0.281656	0.68754	0.574597	0.596904	0.434839	0.294546	0.475834	0.84567	0.307914	0.728029	1.06506	1.03602	0.589713	1.06463	0.763639	0.579051	0.275271	0.456919	1.1567	1.73664	0.689771	0.508654	0.4081	1.13934	0.690937	0.521114	1.13359	1.44263	0.522616	0.873887	0.419816	0.808546	0.981048	0.927251	0.77602	0.958859	0.850402	0.701802	1.97736	0.395117	0.738232	0.428769	0.742275	0.674672	0.212179	0.182006	1.3366	0.504561
AC005261.1	1.59847	0.90751	2.93365	3.46807	2.5295	2.31153	3.36826	2.44417	2.56324	3.36457	4.37096	3.96105	3.0078	2.65041	5.00883	3.41333	5.08662	2.70419	2.48825	2.24458	2.75302	3.70505	1.03916	4.5346	2.93077	2.25043	3.07274	3.99217	2.81554	3.63973	2.8324	2.1695	3.66487	2.0236	2.87861	3.19837	2.98903	2.88793	3.45143	3.93726	1.85096	3.81935	8.85972	4.06696	9.0161	3.62634	1.52982	6.22401	9.08284
MAPKAPK5-AS1	11.7523	9.62141	6.63381	7.35734	6.22575	12.1349	7.22905	5.6705	9.3519	7.07268	8.29403	9.37933	6.97919	5.92898	4.83241	7.66663	9.79517	4.57104	4.8479	5.87718	9.22534	5.69817	16.2306	8.05822	11.5719	13.1157	6.57104	7.00061	8.55615	6.20369	6.31157	5.20038	8.19977	8.51225	8.39892	6.49864	7.30402	7.12661	6.99393	13.1216	7.93721	6.88947	13.7094	7.27562	12.3124	4.93272	12.6243	4.66369	9.68188
AC022973.4	0.0477851	0	0	0.0353703	0.0317678	0	0	0.0506486	0.147297	0	0	0.0372714	0	0	0.161566	0.0907347	0.0870144	0	0.0328802	0	0.183893	0	0	0.0508554	0.0916711	0	0.0302554	0	0.188992	0.0953626	0.0507371	0	0	0	0.0345804	0.0370546	0.0823363	0	0.0421841	0.147127	0.0403747	0.0325154	0.0456389	0	0.208912	0.0338772	0	0.158813	0.214826
AC016831.4	0.0670139	0.0240251	0.0855267	0	0.0594016	0.196485	0	0.0473532	0.0344282	0	0.0191079	0.0174231	0.0106656	0.0145202	0.0377635	0.0353463	0.0406764	0.0102727	0.0230556	0.0170534	0.021491	0.0823721	0	0.0237732	0.12856	0.206278	0.0353586	0.0896505	0.00736231	0.300908	0.0355769	0.0092841	0.0214569	0.0201993	0.0161652	0.0692873	0.0192448	0.0437735	0.0197197	0.126092	0.0566216	0.0607995	0.213347	0.196983	0.366223	0.00791823	0.0931503	0.0494932	0.100424
AC016831.1	0.0337145	0.119661	0.0826142	0.074866	0.0358617	0.0847295	0.117975	0.16438	0.0969961	0.035317	0.126893	0.0499635	0.0643898	0.0591712	0.170988	0.0362765	0.116646	0.0403117	0.0626358	0.0978066	0.107039	0.13498	0.0687593	0.11123	0.106719	0.0778335	0.0448278	0.124484	0.0733383	0.178299	0.150349	0.100889	0.100393	0.054876	0.0585553	0.122875	0.0406644	0.0634243	0.0952409	0.173008	0.0712154	0.325763	0.402504	0.654069	0.700133	0.0956074	0.131218	0.224099	0.409237
AC019330.1	1.06265	0.571455	0.77982	0.819342	0.264921	1.22402	0.981257	0.0938607	0.909888	0.662593	0.719616	0.587098	0.761064	0.805873	0.499018	0.448393	0.806265	0.0407239	0	0.338023	0.596376	0.326547	1.85619	0.376976	0.63706	1.07329	0.58872	0.56864	1.25501	0.48599	0.705186	1.03053	0.63796	1.32125	0.448585	0.377678	0.762918	0.555298	1.01627	1.04517	0.149643	0.18077	0.845769	0.780895	0.0967874	0	0	0	0
DNAJC3-DT	1.31225	0.877117	0.715321	0.828641	0.625952	1.07134	1.19336	0.903682	0.746532	1.2315	0.982976	1.08713	1.16107	0.886728	0.802142	0.689795	1.02602	0.906913	0.535641	0.571652	0.898725	0.929518	1.15081	1.09674	1.52183	1.08684	0.844941	0.934289	1.07025	0.887728	0.543157	0.585453	0.875934	0.650291	0.718928	0.804861	0.970858	0.743841	1.14535	1.11851	1.05864	0.413669	6.85427	2.68047	2.18785	0.620211	0.494656	2.09438	0.166651
AC090116.1	0.150105	0	0.0766288	0.0740715	0.0665271	0.188618	0	0.0530334	0	0	0.0855998	0	0.0477798	0	0	0.031669	0	0	0	0	0.048138	0.105432	0.0566913	0.1065	0.0479937	0.0577556	0.03168	0.0401618	0.0329818	0	0.159378	0.0415911	0	0.226223	0.0362087	0.0387994	0.0862132	0	0	0.102703	0	0.0340464	0.0477878	0.147074	0.546871	0.0709445	0	2.10635	2.92423
AF129075.2	0.168632	0.181369	0.279782	0.270445	0.20553	0.141266	0.42617	0.327685	0.346537	0.252353	0.408701	0.41651	0.214708	0.21923	0.285081	0.409144	0.614142	0.23265	0.560827	0.171651	0.324477	0.207279	0.127377	0.388845	0.323504	0.356863	0.213541	0.203035	0.166737	0.701108	0.387941	0.186898	0.350958	0.254145	0.284744	0.501264	0.0968541	0.286391	0.347355	0.8365	0.237468	0.248616	0.724762	0	0.860116	0.119551	0.312534	0.37363	0.505409
AC024060.2	1.71659	1.50614	1.6258	1.63842	1.35142	1.75967	2.00224	1.91521	1.34604	1.21681	2.51168	1.62078	1.63922	1.46819	2.49468	2.00143	3.20809	0.830966	0.80816	1.276	1.82534	1.47541	1.89377	2.06726	2.33984	1.98146	1.71611	2.53816	1.96529	2.11854	1.91856	0.788547	2.12619	1.22545	1.43838	2.73229	1.24538	1.02685	1.6749	2.87444	1.45038	1.291	6.12652	4.1163	6.71477	1.18495	1.507	2.30204	1.52313
AC092718.4	1.96353	2.34648	3.38901	2.14549	2.13416	2.85895	2.5811	1.91602	2.85014	1.7257	4.55891	2.69837	3.75005	2.91735	6.63889	2.11076	2.9512	0.945978	1.77998	1.40383	2.57874	3.67775	3.7079	2.68674	2.89987	1.33112	2.1707	3.07709	3.06114	3.91853	1.88627	4.53378	2.72434	3.21288	3.02231	4.44697	1.71848	1.83225	3.13659	2.20711	4.42408	7.33785	7.6502	4.76389	8.44808	7.07067	8.23131	5.14463	7.42619
FTX	0.1856	0.250501	0.130976	0.118524	0.104033	0.141761	0.199506	0.354871	0.172006	0.266853	0.255264	0.227081	0.135532	0.158494	0.209177	0.108259	0.139163	0.361495	0.217855	0.119466	0.259091	0.333576	0.17318	0.193652	0.216426	0.256246	0.172814	0.16066	0.187112	0.214247	0.170017	0.111927	0.188766	0.0987238	0.126412	0.242692	0.125411	0.125513	0.276288	0.291327	0.147593	0.151054	1.2339	0.385099	0.445487	0.183181	0.0910539	0.407193	0.188148
AC099850.4	3.54548	2.16832	5.85578	4.42537	1.20163	3.05746	2.75698	1.25265	5.50015	2.8089	4.63839	3.84986	4.31507	2.71135	2.03711	1.49604	1.77228	0.767285	1.38722	1.59218	4.34741	5.85953	3.15069	3.03342	4.06766	3.37034	2.72902	3.85028	3.84932	4.7864	1.69772	5.48977	3.2053	2.5774	2.21358	4.04311	2.27592	2.45213	4.84828	2.56854	4.69906	6.48069	10.6235	6.74343	9.11792	6.50568	3.8653	4.69792	8.90723
ASH1L-AS1	1.10748	1.21097	1.59716	0.710449	0.969403	1.13649	0.839649	1.17384	1.11896	0.883896	1.46837	1.19493	1.07518	0.947851	0.956925	0.806105	1.41166	0.713023	1.29546	1.09912	1.50944	0.797324	2.11226	1.15899	1.15082	0.894854	0.993374	1.00747	1.11936	0.791967	1.1171	0.843862	0.815576	1.16835	1.05523	0.916037	0.747395	1.36	1.56427	1.74281	1.0605	0.816381	1.07536	4.39471	3.51029	0.7328	1.1289	1.6972	0.995768
LINC01560	2.3687	1.93465	1.88202	2.32016	1.46816	2.39458	2.43049	1.92546	1.70185	2.53192	2.02618	2.47264	1.63267	1.31975	2.08751	1.78105	2.14043	1.78548	1.21321	1.22368	2.45023	2.12034	2.48202	2.08495	3.05789	2.17913	1.70273	2.2015	2.17185	2.0259	1.45607	1.53963	1.8647	2.0614	1.57238	2.09919	2.07139	1.6752	2.84573	1.97406	1.23393	1.46636	3.91227	2.35577	3.58168	1.37626	0.59414	2.07166	0.880734
AP002336.2	0.124206	0.044529	0.0951107	0.153228	0.0825727	0.208098	0.144875	0.131649	0.127621	0.18587	0.247906	0.0968779	0.118607	0.134561	0.279968	0.104819	0.603128	0.114239	0.113952	0.12643	0.278825	0.261722	0.187639	0.0881241	0.238277	0.191161	0.183497	0.0996967	0.24562	0.20656	0	0.103245	0.119307	0.187191	0.179767	0.128419	0.214013	0.194715	0.109647	0.212456	0.104944	0.0563439	0.909477	1.33868	1.44804	0.0293518	0.690591	0.183465	0.651452
PCED1B-AS1	2.10021	2.3908	1.09979	1.07377	1.18032	1.88634	1.58262	0.573728	4.36782	1.23124	1.22855	1.04705	2.59825	1.17284	1.23638	2.90984	1.70849	0.411559	0.218506	1.29481	1.22207	1.98463	2.24059	1.8127	4.58287	1.29128	1.27036	2.19557	1.29877	1.56274	1.03452	1.24184	2.57198	1.33788	0.966228	0.727551	1.13786	1.2672	0.834637	1.67401	1.96355	1.17372	0.413584	0.487933	0.993918	3.34628	0.280897	1.3992	1.44386
RMRP	0.0416337	0.0447782	0	0	0	0	0	0.0441286	0.0427783	0	0	0.0324734	0	0	0	0.0263514	0	0	0	0	0	0	0	0	0	0	0	0	0	0	0.0884113	0	0	0	0.0301288	0	0	0	0	0	0	0.0283296	0	0.122379	0	0	0	0	0
LINC00174	0.396581	0.255921	0.485892	0.322903	0.363836	0.602984	0.6106	0.437161	0.774222	0.391692	1.01431	0.658862	0.549124	0.319657	0.56764	0.454329	0.584947	0.455946	0.371119	0.263402	0.789798	1.06129	0.197709	0.371415	0.77602	0.599685	0.341493	0.671667	0.533289	0.569837	0.618989	0.224165	0.796163	0.548677	0.430489	0.40901	0.584248	0.425873	0.766714	1.13151	0.254661	0.345413	1.53023	1.44549	1.35238	0.399241	0.154351	1.13351	2.21079
AC008280.2	1.12798	0.295096	0.700337	0.676965	0.891755	0.612923	0.746737	1.00169	0.657804	0.684318	0.521551	0.689571	0.902464	0.416148	0.446662	1.02267	1.05475	0.700986	0.839073	0.488748	0.17598	0.610267	0.414497	1.71957	0.672568	0.738988	0.849302	0.660695	0.763628	0.88217	0.647384	0.405456	0.849219	0.523775	0.948647	0.543721	0.945518	1.29039	1.15724	0.969927	0.412131	0.560091	1.45583	0.896109	1.13289	0.367419	0	0.911872	0.890851
CD2BP2-DT	3.64429	2.12913	2.18771	2.96391	2.57229	3.9009	1.99417	1.64521	2.65812	2.1545	2.71322	3.19339	2.19113	3.07077	2.40856	3.00428	2.99033	0.641402	3.91615	3.22867	3.02997	1.87238	2.95663	2.3941	3.47403	3.92098	2.74894	3.46687	3.09916	2.26712	2.53184	1.88862	4.1488	4.00735	2.97911	2.40728	3.74045	2.92707	2.93911	3.94796	1.80567	1.68378	2.7716	1.85148	3.73724	2.00948	1.37584	1.91894	2.52832
AC092171.3	0.496651	0.271608	0.580136	0.311542	0.212656	0.624079	0.255284	0.330124	0.389217	0.352717	0.381631	0.334852	0.538573	0.290005	0.322564	0.367628	0.183942	0.278723	0.324362	0.359878	0.445426	0.301541	0.352893	0.26876	0.492538	0.845354	0.421054	0.439189	0.316282	0.36118	0.366452	0.146942	0.671122	0.532833	0.347226	0.267629	0.3336	0.752198	0.401282	0.475162	0.277384	0.721716	1.08537	0.76705	0.736037	0.29839	2.17636	0.857945	0.264906
AC090739.1	0.126077	0.1356	0.289631	0.186643	0.314313	0.118819	0.183821	0.501121	0.161929	0.141503	1.18631	0.540856	0.150493	0.0819532	0.568373	0.139648	0.975717	0.14495	0.0433758	0.0962507	0.667133	0.265665	0.142849	0.536711	0.393033	0.254679	0.279393	0.505993	0.270097	0.974975	0.669329	0.2358	0.302761	0.370521	0.250904	0.586594	0.244392	0.0741182	0.890395	0.582275	0.079894	0.214473	0.873006	1.01913	2.48038	0.245801	0	0.48885	0.63765
AC002128.2	0.0722189	0.11651	0.0829526	0.213825	0.16804	0.181497	0.379065	0.191366	0.185511	0.0540367	0.741311	0.36614	0.137928	0.211248	0.406966	0.22855	0.131507	0.0332118	0.347849	0.165402	0.903249	0.342398	0.12274	0.192148	0.311726	0.375131	0.274355	0.260857	0.523653	0.432372	0.536763	0.180093	0.138741	0.195914	0.156787	0.560017	0.155546	0.028304	0.382524	0.963548	0.152549	0.221136	0.586291	0.742987	0.315734	0.332796	0	0.480036	0.40584
AL592148.3	0.160241	0.244909	0.316449	0.324616	0.15699	0.211952	0.363975	0.518469	0.233971	0.366004	0.353496	0.401266	0.297983	0.449535	0.494265	0.32028	0.399293	1.02392	0.394612	0.296173	0.162279	0.346539	0.028667	0.969366	0.22651	0.214172	0.368451	0.203086	0.294643	0.496509	0.331325	0.378564	0.234931	0.167778	0.28685	0.359693	0.334231	0.218153	0.431821	0.588583	0.306411	0.154946	0.588011	0.446226	0.940221	0.328849	0.46892	0.523214	0.436025
TMEM161B-AS1	1.46794	1.21114	0.789161	1.06423	0.741945	1.32026	0.903015	0.751309	0.934936	1.00056	1.6986	1.14104	0.883308	0.830019	0.872533	0.763651	1.66607	0.869267	1.38365	0.52579	1.21398	1.28706	1.2702	1.03259	1.46591	1.4043	0.948531	1.15406	1.2261	1.36944	1.1743	0.635175	0.999581	0.93645	0.811273	1.42677	1.18238	0.906316	1.12724	1.56331	0.870753	0.636258	2.83282	1.04917	2.50553	0.595189	0.796614	0.891078	0.711916
AC016394.2	1.6618	1.48092	0.927127	0.931331	0.536605	2.29699	0.664574	1.03167	1.31721	1.35	1.25905	1.18507	0.81612	0.586401	0.32107	0.976685	1.03751	0.786059	0.604401	0.579962	0.936437	0.825398	3.14709	0.833758	1.22966	1.31535	0.856776	0.97183	1.14236	0.900163	0.3781	0.473608	1.09458	1.07336	0.841813	0.625908	0.818108	0.725727	1.00596	1.19387	0.581696	0.630003	1.67786	2.37259	3.11367	0.555405	1.84794	1.20979	1.28073
AC009065.9	0.821261	0.70054	0.889108	0.90136	0.545979	0.818463	1.5525	0.540295	0.756547	0.678065	1.71993	1.01607	0.784244	0.53384	1.37243	0.501881	1.1345	0.781404	0.389722	0.410776	2.1524	1.28298	0.962601	1.02472	1.00507	0.784538	0.484125	1.06837	0.821365	1.41289	0.661514	0.847445	1.00649	0.845065	0.553331	1.3176	0.780732	0.843518	0.925	1.65667	0.71783	0.481747	0.973708	0.665941	2.47619	0.762924	0.393643	1.25492	1.20948
AC007255.1	1.39473	1.31673	1.40029	1.62885	1.81323	2.08362	1.6449	1.05124	1.83115	1.13635	1.85585	1.72848	1.42065	1.49087	1.65923	1.11818	1.89069	0.242307	0.99168	1.44336	2.44514	0.702075	3.02007	0.791649	1.69458	1.27006	1.29519	2.46292	1.97153	1.96384	1.77707	1.6875	1.8756	1.97587	1.81677	1.82659	1.2283	1.34833	2.22993	2.60837	1.33556	1.37084	2.84178	4.78298	3.76019	0.109866	0.86164	0.583711	2.15974
AP001318.2	2.05772	0.992097	1.6572	1.54938	2.33501	2.67484	1.86218	1.54176	1.89558	0.955651	2.42782	1.93704	1.89722	1.86799	3.11882	2.29044	3.55321	1.69681	2.63648	1.62509	1.57011	1.90633	1.16573	2.00115	2.07586	1.96571	2.02168	1.79407	1.54349	1.98245	1.95882	1.09116	1.70393	1.09076	2.07961	2.17338	2.17013	1.25141	2.44292	1.56569	1.73862	1.56916	2.50746	1.77284	2.55925	1.03123	0.591778	2.43681	0.877233
MAP3K5-AS1	0.132568	0.190108	0.338381	0.130835	0.264396	0.222109	0.103086	0.0936749	0.0908086	0.132256	0.151198	0.172334	0.0843953	0.201069	0.0996059	0.195783	0.160934	0.0406433	0.121624	0.134942	0.170056	0.186228	0	0.141086	0.0847731	0.0510079	0.111915	0.283757	0.174771	0.13228	0.140758	0.257124	0.0424465	0.199793	0.287805	0.137065	0.190352	0.207824	0.429109	0.136056	0.261356	0.511167	0.337638	0	0.386383	0.281952	0	0.58745	0.297991
AL451042.1	0.369192	0.617676	0.565419	0.54655	1.00904	1.03093	0.478477	0.782633	1.01158	0.552486	0.631614	0.671912	0.940138	0.906607	1.8493	0.804881	0.821679	0.0377295	2.06051	1.28399	2.0917	0.129658	0.418307	0.654856	1.18043	0.284107	0.779189	1.58048	0.757127	0.327458	1.74222	0.71607	0.827472	0.482222	0.77183	1.08153	0.989549	1.02893	0.615625	1.72613	1.0398	0.55826	0.861938	0.602897	0.807036	0.232656	0.114041	0.727113	0.461046
AP002807.1	0.332243	0.555857	0.466428	0.505512	0.429482	0.278325	0.602825	0.332588	0.891374	0.359083	1.7052	0.561475	0.423023	0.335947	0.395252	0.443942	0.537777	0.526279	0.304815	0.338191	1.13652	1.01124	0.313701	0.451809	0.7259	0.681793	0.257109	0.711153	0.900358	0.920892	0.411562	0.460288	0.762386	0.534104	0.320577	0.543897	0.270334	0.303829	0.716956	1.59126	0.467866	0.238634	0.546497	2.11597	1.37184	0.628115	0.205254	1.22689	2.5724
AC096586.2	0.354216	0.272122	0.426237	0.524379	0.134563	0.508685	0.413161	0.536347	0.207974	0.378625	0.865704	0.592031	0.241608	0.427606	0.570306	0.384337	0.829301	0.418875	0.313368	0.347681	0.827624	0.693078	0.114668	0.484683	0.970758	0.700925	0.192235	0.28432	0.23349	0.60591	0.537284	0.210313	0.437458	0.274546	0.47605	0.313914	0.305167	0.317313	0.75941	1.50608	0.0855101	0.206594	1.06325	0.297484	0.442457	0.215247	0	0.504528	0.454982
AC022306.2	0.655328	0.296768	1.24134	1.0212	0.642033	0.520085	0.80461	0.584925	0.992298	0.464532	1.06213	0.887772	1.02103	0.874379	1.04956	0.895053	1.69577	0.729632	0.498386	0.658283	0.82958	0.654102	0.508031	1.5417	0.827094	0.716634	0.786174	0.775179	0.773008	0.860401	0.769056	0.573404	0.927655	0.592587	1.07328	0.748882	1.09945	1.00031	1.18748	1.06195	1.04912	0.610203	3.78831	0.709685	2.18647	0.440141	0.479429	1.49019	1.16295
AC245297.4	2.09576	1.51472	0.539223	0.446766	0.0445847	1.01125	0.64535	1.51052	0.17227	1.2545	0.659717	0.850016	0.608394	0.163475	0.736941	0.583651	0.427423	1.3416	0.565287	0.691183	0.483911	2.26105	1.50072	1.10629	0.6272	1.62566	0.265389	0.242238	0.419967	0.702646	0.498451	0.139366	0.289886	0.272896	0.388257	0.299026	1.09778	0.565102	0.222013	0.326937	0.226657	0.216761	0.864705	0.443543	0.842945	1.42635	0.419491	2.50748	0.150749
MIR181A2HG	0.235966	0.253788	0.0516261	0.149709	0.0448204	0.25415	0.196595	0.214377	0.138545	0.353116	0.17301	0.0788779	0	0.0657359	0.0759833	0.106679	0.0613833	0.124017	0.0695848	0.0772041	0.0648626	0.106547	0.229163	0.287002	0.291007	0.116733	0.06403	0.081173	0.177763	0.168181	0.143168	0.0840618	0.129519	0.121928	0.0487887	0.104559	0.0290416	0.132114	0.208308	0.103789	0.170891	0.0458752	1.3844	0.396345	0.294748	0.215084	0.281139	1.49377	0.151546
LINC01311	0.23165	0.0996586	0.319296	0.228622	0.133469	0.174651	0.162119	0.180057	0.380831	0.115553	0.435937	0.168637	0.280198	0.220848	0.400319	0.205268	0.534311	0.127837	0.180648	0.094319	0.297156	0.276604	0.244969	0.197227	0.281453	0.303047	0.234673	0.433859	0.223957	0.246557	0.180371	0.154045	0.237348	0.307226	0.223517	0.251484	0.133049	0.242102	0.408996	0.412092	0.24792	0.189152	0.796486	1.58881	1.24906	0.197074	0.515195	0.273737	0.590139
AC018809.1	0	0.0434016	0.247208	0.119479	0.214619	0.152122	0.0470689	0.171088	0.12439	0.181165	0.759408	0.251801	0.0385349	0.104924	0.318361	0.255414	0.514377	0.40827	0.111067	0.184843	0.31059	0.255096	0	0.171786	0.309659	0.186322	0.229952	0.161955	0.186201	0.362395	0.385621	0.100631	0.310097	0.218942	0.116811	0.375505	0.243361	0.126524	0.391862	0.538402	0.0681916	0.109835	0.616662	0.474468	0.793902	0.0858262	0.224369	0.223525	0.816376
AC007608.2	0	0	0	0	0	0	0	0.0206395	0	0	0	0	0	0	0	0	0	0	0	0	0.0187343	0	0	0	0	0	0	0	0	0	0	0	0	0	0	0	0.0167762	0	0	0	0	0.0132502	0.167383	0.114477	0.595927	0.0138051	0.0541344	0.0215723	0.175085
TRIM52-AS1	11.87	8.37121	3.1943	4.619	2.19828	9.82296	4.68762	7.40501	6.82997	7.13063	6.22271	6.54698	3.99964	3.08632	3.40181	6.19283	5.9595	6.0826	4.36382	3.30112	5.44895	3.48382	8.2616	5.95541	7.38447	6.42018	4.80997	5.98887	5.45473	4.60233	3.07881	3.65072	5.65205	6.62415	3.69367	6.67986	4.9963	7.23069	4.93997	4.83813	4.25527	3.58848	5.15019	5.18381	2.40939	3.52237	4.71414	3.70077	5.18389
MBNL1-AS1	2.46709	6.83038	1.79576	0.597004	0.982278	0.621719	4.31645	7.931	0.571053	8.79368	2.83795	1.57273	1.10999	1.42965	1.72635	0.703537	1.72787	19.5586	2.20357	2.73979	1.22916	5.7984	2.59563	7.13746	0.750889	1.30653	0.808921	0.851406	0.717065	7.60161	1.44648	0.969031	0.533852	0.64659	0.902484	4.13627	1.44812	2.70414	0.74492	0.84516	1.74949	0.345892	0.16507	0.139458	0.251868	0.511738	0.0847901	0.578157	0.144734
AC011676.1	0.0562107	0	0.0430434	0.0832138	0.0747383	0.0706328	0	0.178737	0.173268	0.0841176	0.19233	0	0	0.146153	0.126703	0	0.204714	0	0.0386777	0.214564	0.270397	0.23689	0	0	0.377422	0	0.0711803	0.0451188	0.111158	0.0560886	0.0596832	0	0.161981	0	0.0406777	0.130765	0	0.0881204	0.0992443	0.0576897	0.0949873	0	0.429489	1.48704	0.122874	0.119551	0.781336	0.124543	0.884465
SATB2-AS1	7.59331	3.576	7.59604	5.0182	5.14432	8.49392	5.36887	4.91049	7.80721	3.08546	6.99067	7.87735	6.44538	4.85471	4.31553	4.89139	7.06353	0.890788	0.295421	2.96136	8.46294	2.64568	6.34088	4.60644	7.1207	8.2521	6.42614	7.798	9.10895	7.03384	4.69644	5.11256	8.17137	6.68575	6.16699	5.00941	6.39131	5.76019	9.4842	7.4242	4.09157	1.45732	8.04854	5.07739	2.49906	0.0283143	0.235939	0.470102	1.30174
AC138932.6	0.317096	0	0.242817	0.176035	0.105404	0.0996136	0.277398	0.168049	0.12218	0	0.406865	0.401908	0.113551	0.20612	0.580739	0.100351	0.360886	0.0729125	0.354557	0	0.343207	0.208804	0	0.253103	0.266139	0.183012	0.175675	0.0954467	0.209022	0.355958	0.336686	0.263583	0.456884	0.179211	0.28684	0.368835	0.0341484	0.0932072	0.209947	0.650879	0.167451	0.161826	0.454282	0.11651	0.346578	0.252905	0	0.351287	0.801876
NPTN-IT1	0.185719	0.578213	0.329339	0.289408	0.194948	0.184239	0.615669	1.09821	0.230999	0.863026	0.72743	0.457443	0.177348	0.285921	0.7381	0.142295	0.195792	1.6722	0.262307	0.134321	0.601862	1.25641	0.132901	0.447318	0.562555	0.564148	0.204234	0.203993	0.341491	1.30697	0.570821	0.146252	0.356788	0.176777	0.190988	1.06116	0.21895	0.291148	0.552256	0.822615	0.189954	0.152977	0.662834	0.14366	0.320505	0.318769	0.0271739	0.443976	0.439437
LINC02418	0.0142198	0.0203918	0.0145185	0	0.00315114	0.0178682	0	0.00502398	0.00974052	0	0.0202727	0	0.0135789	0.00308108	0.00534207	0.00300008	0	0.00435957	0.00326148	0	0.00912045	0.00998783	0	0	0.0181862	0.016414	0	0.00760925	0.00312445	0.00472965	0.00503276	0.00788005	0.00910597	0	0.00343013	0	0	0.0222921	0.00418436	0.00486466	0.0160195	0.00967588	7.61904	1.5326	5.00449	0.63511	0.237189	0.0105021	0.0106546
AL355802.3	0	0.0440387	0.219482	0.181849	0.0816636	0.154355	0.238799	0.130199	0.168288	0.0612747	0.560404	0.0958113	0.234603	0.053232	0.553772	0.181414	0.372805	0	0.281744	0.0312594	0.43333	0.12942	0	0.130731	0.314205	0.189057	0.103701	0.0657327	0.0809719	0.204286	0.130427	0.068072	0.0393311	0.0370259	0.118525	0.317514	0.176381	0.128381	0.253027	0.336188	0.0691926	0.417927	0.82125	0.962865	0.358025	0.087086	0	0.408251	0.18408
AC006504.7	1.12457	0.793738	1.18407	0.6243	0.60744	1.01567	0.573871	0.595979	0.68607	0.841441	0.931893	1.06901	1.10744	0.662466	0.712927	0.64505	1.85581	0.420194	0.169268	0.402434	0.710016	0.222155	0.637085	1.12202	0.775307	1.54148	0.689776	0.705203	0.509634	1.33252	1.00747	0.408968	0.877672	0.762676	0.508632	0.926541	0.544976	0.771296	0.930708	1.11809	0.178157	0.717386	1.9803	5.06167	2.84235	0.199315	0	0.583981	0.63196
AC092794.1	0.460116	0.123717	0.293612	0.312195	0.152944	0.337266	0.536683	0.853455	0.393972	0.401654	0.590374	0.358881	0.109844	0.274163	0.864278	0.36403	0.907671	0.352661	0.474898	0.175633	0.516449	0.282782	0.260663	0.693713	0.441344	0.663892	0.194217	0.0923308	0.404396	0.535637	0.366406	0.191233	0.0368307	0.312049	0.249728	0.386527	0.330336	0.270493	0.575429	0.62963	0.226778	0.052181	0.732419	0	0.502896	0.135916	0	0.16991	0.172377
AL353796.1	0.268531	0.133298	0.263626	0.244635	0.196831	0.224953	0.305186	0.277325	0.247615	0.309115	0.294489	0.306117	0.164377	0.277493	0.263843	0.209185	0.488983	0.322977	0.151608	0.110387	0.311345	0.398989	0.156028	0.40303	0.277389	0.508663	0.226696	0.23765	0.245089	0.577119	0.219323	0.188873	0.25794	0.174334	0.214258	0.363069	0.166095	0.232074	0.364702	0.162531	0.238523	0.299852	1.24947	0.870285	1.21914	0.561362	0.191416	0.503438	1.26913
AL390208.1	0.20791	0.111806	0.159207	0.25649	0.115183	0.217712	0.282925	0.293825	0.142417	0.20742	0.592819	0.162165	0.132359	0.135146	0.0781071	0.219323	0.694089	0.254967	0.143059	0.026454	0.30004	0.109525	0.157046	0.221268	0.365617	0.319988	0.131639	0.111256	0.251256	0.311187	0.441508	0.115215	0.166424	0.15667	0.100305	0.161222	0.238826	0.0543226	0.336491	0.924647	0.0585559	0.0707361	1.12524	0	0.833213	0.171963	0	0.268716	0.233673
LINC01089	1.10714	1.00489	0.85193	0.759537	0.89042	1.07224	1.73234	0.801405	1.54822	0.905181	2.12508	1.63863	1.50592	0.698605	0.979968	0.953702	1.8587	0.670585	0.813832	0.618455	2.14072	1.28595	0.715941	0.977108	2.02034	1.68942	0.892484	1.74266	1.40264	1.83225	1.66869	0.713793	1.84162	1.39672	1.16467	0.996727	0.949179	0.74929	2.35523	3.82452	0.748359	1.03632	2.02714	1.09537	2.11321	0.712158	0.405379	1.42396	1.26254
AC005034.4	2.59306	1.75852	3.13007	3.89547	2.15697	2.56817	3.32255	3.16816	2.92685	3.23051	4.49083	3.41738	4.26928	3.73645	4.0022	3.04802	4.30316	3.18388	1.88093	2.22341	2.91258	3.76828	1.73676	3.77925	3.11215	2.68354	3.06526	3.33226	3.75536	4.21891	2.87532	3.31281	3.07974	2.71442	3.66982	4.59605	3.57659	3.38424	5.00675	2.47775	3.00039	5.32811	5.124	2.25284	5.27738	4.30155	1.20738	4.69814	5.08222
LENG8-AS1	0.876175	0.538486	0.794164	0.833838	0.630036	1.0111	1.12626	0.890774	0.73491	0.615447	1.72839	1.576	0.990359	0.534666	0.624732	0.837503	0.879139	0.986772	1.16885	0.614292	1.30744	1.29991	0.709096	0.837321	1.71516	1.42418	0.781187	1.17692	0.718993	1.48091	0.778417	0.63913	1.61453	0.549752	0.866977	1.30338	0.477557	0.51859	1.56274	2.51417	0.649651	0.644862	3.77425	3.52154	4.72955	0.684547	0.94449	2.61481	2.93414
AL359715.3	0.419584	0.417847	0.785392	1.10426	0.650864	0.468656	1.21445	0.576498	0.335315	0.488363	0.770995	0.848468	0.623267	0.212131	0.753113	0.904904	0.565957	0.485965	0.213859	0.403368	0.627939	0.425693	0.792336	0.727699	0.626058	0.466389	0.718272	0.548841	0.655594	0.651268	0.891009	0.400445	0.880705	0.533988	0.899669	0.951989	0.883625	0.74304	0.795682	0.542267	0.722162	0.719052	0.638214	0.593828	0.985129	0.264412	0.086404	0.619768	0.349316
AC018926.3	0.329788	0.236464	0.589249	0.44753	0.511571	0.345336	0.384667	0.34955	0.67771	0.493518	0.799283	0.34297	0.314923	0.428741	0.433629	0.452258	0.900792	0.454985	0.378203	0.419615	0.423045	0.694917	0.249107	0.46797	0.263611	0.507567	0.417614	0.617661	0.615931	0.877524	0.466882	0.228444	0.686357	0.497023	0.318208	0.42622	0.520889	0.301584	0.824876	0.958984	0.510849	0.224404	0.734944	0.323129	0.12015	0.194835	0	0.608913	1.11196
CR936218.1	0.293627	0.315804	0.505901	0.434683	0.244006	0.184482	0.599355	0.466834	0.527975	0.768957	1.50701	0.801579	0.630882	0.190865	0.744587	0.325232	0.401011	0.945224	0.10102	0.224163	0.918105	0.46404	0.0831721	0	0.915354	0.593135	0.790125	0.294608	0.483878	0.952215	0.623533	0.244074	0.634602	0.132758	0.212488	0.62615	0.505935	0.345235	0.972039	1.80812	0.496184	0.349647	1.68264	0	1.60463	0.312249	0	0.569253	0.660023
LINC01138	0.623342	0.548527	0.308091	0.29781	0.237339	0.469965	0.436242	0.276291	0.675415	0.508807	0.455649	0.406634	0.508665	0.419922	0.217145	0.337148	0.309566	0.59938	0.191061	0.601335	0.370728	0.519423	0.243983	0.50056	0.407666	0.405551	0.254743	0.391175	0.377273	0.418428	0.342959	0.56054	0.609642	0.425309	0.266554	0.294414	0.366154	0.333137	0.370188	0.558321	0.23461	0.439577	1.15822	2.99825	1.10246	0.586545	0.236306	0.721944	0.942604
PAN3-AS1	0.429465	0.444136	0.467997	0.268982	0.362378	0.622677	0.732129	0.507723	0.610992	0.49437	0.409751	0.669946	0.520521	0.440218	0.614335	0.313642	0.631644	0.425386	0.306874	0.504408	0.524422	0.556894	0.31816	1.1778	0.617915	0.743598	0.366044	0.503821	0.381085	0.593352	0.368304	0.205954	0.475991	0.25392	0.358602	0.422686	0.256151	0.297789	0.65618	0.593337	0.362864	0.314708	2.35062	2.03923	2.78026	0.339599	0.229601	0.603865	0.408423
U62317.1	0.370692	1.19607	0.482558	0.3567	0.418944	0.419221	0.864755	0.196453	1.6378	0.554729	0.634178	0.260218	2.93806	1.34937	0.417782	0.539635	0.810015	0.170472	0.22956	0.679191	0.106991	1.09355	0.79801	0.157804	0.355568	0.641836	0.375529	0.53558	0.610876	0.147955	0.432951	3.08133	1.13943	1.57545	0.482862	0.17247	0.319361	0.464901	0.261794	0.152178	1.34678	0.983725	0.24783	0.871696	0.324125	2.94337	0	0.32853	0.583277
EP300-AS1	0.634799	0.945339	1.49569	0.795174	0.454481	1.04311	0.455652	0.465812	0.752599	0.58459	0.918934	0.647478	0.746076	0.761788	0.935576	0.463601	0.266755	0.449122	0.403196	0.410066	0.939586	0.565919	1.10654	0.415745	0.843093	0.845481	0.711102	0.823098	0.965639	0.925769	0.829558	0.60885	0.844285	0.662335	0.954102	0.946637	0.252414	0.956887	1.55186	1.00231	0.660131	0.730991	0.886114	0	0.213483	0.623132	3.12227	0.324576	0.768343
AC092338.1	0	0.0567402	0	0.117149	0.140289	0.132583	0.123069	0.223668	0.271031	0	0.135381	0.205741	0.151133	0.13717	0.23783	0	0	0.145566	0.108901	0.0402751	0.253777	0.0555824	0.0597738	0.0561453	0.15181	0.365376	0.0334026	0.127037	0.173876	0.0526411	0.616162	0	0.202699	0	0.0381775	0.122727	0.0909009	0.082704	0.326005	0.379006	0.0891489	0.14359	0.655021	0.310143	0.576606	0.037401	0	0.409109	0.237172
AL117379.1	0.494438	0.106357	0.605787	0.39038	0.328705	0.372779	0.69206	0.593943	0.778983	0.295965	0.50753	0.668462	0.566583	0.214265	0.445799	0.625895	0.780302	0.151587	0.340215	0.50329	0.507404	0.347287	0.224086	0.526207	0.69559	0.60878	0.417409	0.449789	0.67357	0.920947	0.594981	0.273997	0.569924	0.119227	0.405516	0.255606	0.170389	0.258374	0.727474	0.879576	0.473463	0.381299	3.52599	1.45336	4.8997	0.420637	0.366547	0.803369	1.48188
AC121761.1	0.240925	0.307707	0.357446	0.100311	0.180189	0.189212	0.228326	0.271322	0.278492	0.428137	0.32201	0.293619	0.330719	0.127243	0.25456	0.400286	0.219356	0.166193	0.797799	0.160937	0.46358	0.20624	0.324158	0.464733	0.37553	0.156431	0.152543	0.024173	0.238217	0.330552	0.223832	0.0375499	0.216958	0.204242	0.217936	0.151794	0.181618	0.224255	0.305735	0.339988	0.508907	0.747963	1.89836	0.265568	2.00785	1.3771	0	0.817389	0.440016
AC087276.2	0.121943	0.262307	0.280135	0.180524	0.162137	0.459692	0.568943	0.258502	0.125296	0.182485	0.834481	0.28534	0.116447	0.0792662	0.274869	0.0771823	0.222053	0	0.251722	0.279285	0.46928	0.385432	0.414497	0.389335	0.350905	0.563038	0.231628	0.0978807	0	0.608393	0.38843	0.202728	0.117134	0.110269	0.352985	0.472801	0.315173	0.0955841	0.538251	0.876064	0	0.248929	0.815266	0	0.266562	0.172903	0	0.405276	0.274108
LINC01176	0.791141	0.352095	0.522256	0.726951	1.30582	1.19981	0.859152	0.433733	1.79397	0.489898	1.51683	0.851135	0.963891	0.780259	0.953136	1.07055	1.63934	0.351281	0.300343	0.479018	1.44355	0.833532	0.587289	0.81294	1.02054	0.944707	1.12274	0.919696	1.07896	1.60607	2.14349	0.793688	1.28403	1.06076	0.750201	0.719259	0.869615	0.470442	0.866992	2.29588	0.622353	0.222758	2.68371	1.60379	1.96793	0.676922	0.303365	0.604446	0.98116
AC012317.1	0.752212	0.314621	0.640009	0.24746	0.444511	0.525117	0.584924	0.221469	0.687017	0.125074	1.64435	1.04304	0.917838	0.325971	0.376786	0.238051	0.608775	0.0384361	0.373812	0.28713	2.25149	0.396259	0.568187	0.444746	2.20466	1.44714	0.582106	0.805041	0.991678	0.70888	0.754311	0.208423	1.64579	0.717984	0.604834	1.10179	0.828066	0.327564	1.99213	3.13091	0.35309	0.19905	0.359214	0	0.1827	0.08888	0	0.416661	0.0939359
AL512791.1	0.743855	0.560026	0.797451	1.15626	0.939585	1.40206	3.29702	1.34033	0.687875	1.66973	3.88138	1.39246	1.06549	1.30551	1.9282	0.941624	2.43815	4.37864	1.68905	0.397515	1.78913	0.940454	0.337124	1.74163	1.99782	1.28795	0.753562	1.25385	1.42196	2.96896	3.63312	1.23664	1.21468	1.07622	0.592132	2.8264	0.448596	0.46645	2.69233	3.81713	0.43995	0.607387	1.63403	0.655952	3.25206	1.05471	0	1.64812	1.00324
SCAMP1-AS1	7.13553	6.42887	2.41257	2.25831	1.43223	6.21226	2.09163	2.28346	3.42914	3.55937	3.03588	3.17616	2.58048	1.91845	2.42803	1.7419	2.60776	1.91275	2.57917	1.81582	3.29471	3.21444	8.81847	2.33254	3.98959	5.40479	2.25501	2.91872	3.21779	2.43547	2.27422	1.84254	3.52872	2.78139	2.88376	2.49139	2.88598	3.18212	2.69336	3.6169	2.94609	1.43204	4.53147	2.89175	5.33541	1.4567	4.15433	3.07644	3.41503
AP005899.1	0.164086	0.0441197	0.157061	0.242911	0.245441	0.206186	0.287086	0.260878	0.126448	0.122775	0.315807	0.223971	0	0.15999	0.508558	0.12982	0.149396	0.188648	0.169357	0.187901	0.19733	0.0864388	0.185914	0.218285	0.275435	0.189404	0.155838	0.0329268	0.162242	0.286526	0.217778	0.136394	0.354631	0.222564	0.237486	0.190859	0	0.128617	0.90533	0.968317	0.10398	0.111652	0.39179	0.120579	0.269012	0.29082	0	0.954337	2.85848
AP002907.1	0.171659	0.08392	0.143398	0.311877	0.124494	0.0980463	0.382246	0.148864	0.160344	0.140118	0.480556	0.243437	0.119216	0.0608631	0.175878	0.128403	0.397832	0.287061	0.128854	0.0595677	0.240219	0.164415	0.0707254	0.199296	0.209561	0.324239	0.118568	0.325676	0.205733	0.404858	0.198833	0.0648588	0.299797	0.141113	0.101638	0.302526	0.121	0.0611605	0.358182	0.352351	0.0922971	0.127424	0.775032	0.688061	1.56917	0.243394	0	0.276608	0.456016
LINC-PINT	0.6969	0.893065	0.287642	0.270726	0.262867	0.608647	0.524618	0.408622	0.553551	0.702657	0.887849	0.354668	0.415341	0.298789	0.65174	0.425452	0.423008	0.622792	0.360495	0.28677	0.375657	0.729034	0.896012	0.646995	0.630541	0.890012	0.278518	0.420529	0.306252	0.572091	0.341113	0.201314	0.455771	0.129611	0.293294	0.797196	0.281038	0.271192	0.453776	0.588422	0.354967	0.386764	1.7891	3.3415	3.16562	0.627219	0.563358	0.635157	1.41097
AL136221.1	0.219211	0.188614	0.335722	0.194711	0.116586	0.550908	0.357965	0.232347	0.315333	0.131217	0.637542	0.718114	0.20933	0.398979	0.543527	0.305242	0.479007	0.0403239	0.331838	0.200822	0.463978	0.230956	0.099349	0.373273	0.420534	0.607285	0.305348	0.316718	0.520193	0.918685	1.21032	0.655979	0.379016	0.0792893	0.571087	0.475959	0.151085	0.206191	0.81277	0.809922	0.148173	0.208827	0.711842	1.15984	0.766693	0.0621636	0	0.242847	0.295649
AL513327.1	0.116719	0.173358	0.170244	0.213931	0.121936	0.216508	0.337114	0.382924	0.13135	0.207937	0.413629	0.407506	0.143304	0.209547	0.68279	0.119609	0.576896	0.270938	0.149152	0.0891068	0.331535	0.263514	0.113354	0.254353	0.277228	0.230965	0.175956	0.298908	0.208833	0.52687	0.318677	0.221764	0.293636	0.110571	0.164909	0.413757	0.134076	0.139412	0.47594	0.889872	0.178453	0.298777	0.467143	0.522801	0.899074	0.61864	0.0618063	0.511062	0.687148
AC020663.2	0.340933	0.333349	1.49522	1.00943	1.77202	1.0126	0.46997	0.558471	1.21015	0.185526	0.424195	1.03951	1.39106	1.36999	0.663693	1.43205	0.677262	0.171041	1.38622	2.15321	0.715651	0.228583	0.632108	0.395824	0.683777	0.429317	1.31481	1.2439	1.00109	0.309266	0.526539	0.927481	0.922916	1.68159	1.65976	0.721021	0.720958	1.43336	0.4925	0.890665	0.707062	0.927953	0.592038	1.82209	3.0488	0.153812	3.3604	0.686718	1.18438
AC139530.1	2.22366	1.1169	1.4694	0.77702	0.870473	1.48929	0.868954	1.49551	1.85567	1.31755	1.7766	1.35583	1.85396	1.16662	1.2976	1.03593	0.96605	1.11086	1.77084	1.12886	1.78098	1.11789	2.89037	1.54966	1.7973	1.68078	0.957676	1.22314	1.38393	1.20515	1.17453	0.928889	1.47457	1.40856	1.42948	0.831527	1.1864	2.06151	1.83348	2.259	1.05863	0.560689	1.06729	1.39352	1.55447	0.696204	1.28658	0.900341	1.57311
AC025857.2	1.12516	1.91606	0.933391	1.11045	1.18435	0.942563	1.85922	1.29197	2.1195	0.140314	2.24574	0.950733	1.61167	1.15802	2.00781	0.356077	1.36591	0.603673	1.22582	1.1453	1.62375	1.97574	1.59355	0.598726	1.07925	1.08231	1.12797	0.827873	1.48335	1.87119	1.59289	1.32497	0.36026	1.01744	0.610679	1.89041	0.807795	1.02893	2.23487	1.82838	0.792226	2.61585	7.61192	3.30732	5.73893	7.37853	0.521328	2.07747	6.11215
AL360181.2	0.285184	0.421745	0.65514	0.580503	0.402882	0.582326	1.0395	0.982389	1.02559	0.480115	1.73811	0.917554	0.510618	0.602474	0.522294	0.676887	0.843873	1.04919	1.05474	0.462649	1.74912	1.05163	0.484684	0.303507	1.53871	1.4402	0.473986	0.77257	1.08092	1.06712	1.13551	0.29632	1.40392	0.483526	0.696525	0.801647	0.706369	0.251481	1.66789	2.3415	0.512036	0.485133	1.42997	1.04785	0.623398	1.38999	0.594614	1.26374	3.28536
AC022762.2	0.494804	0.177392	1.01039	0.769128	0.712721	0.849734	1.13505	0.489491	0.779558	0.394911	1.11457	1.60807	0.630001	0.750481	1.28262	0.793386	2.0423	0.227548	0.885213	0.465888	0.99969	0.521316	0.186876	0.860106	0.822669	1.12327	0.699677	1.25769	1.04372	1.67868	1.54109	0.6855	1.2199	0.715889	0.740016	0.882492	0.611011	0.58177	1.01922	2.04822	0.571363	0.549926	0.88215	0.339369	1.47821	0.420948	0.41267	0.87705	1.4459
AF117829.1	0.247587	0.359327	0.084516	0.119231	0.132867	0.138688	0.205283	0.316173	0.186964	0.299084	0.377642	0.172173	0.116789	0.17645	0.242058	0.0962896	0.244434	0.386848	0.0944168	0.0979233	0.169323	0.348852	0.263625	0.358734	0.243208	0.282347	0.13032	0.153239	0.169102	0.282767	0.16153	0.121499	0.206303	0.129474	0.0928231	0.395545	0.133636	0.149643	0.265967	0.244917	0.156264	0.101488	0.461538	0.245511	0.684666	0.262232	0.099513	0.330462	0.556534
LINC00685	0.938508	0.280387	1.03807	1.08061	0.935888	0.524135	0.912236	0.607902	0.642874	0.78025	1.6056	1.34203	0.746839	0.440594	0.705154	0.627016	1.42415	0.719329	0.753402	0.955311	1.45471	1.20853	0.0590755	0.776852	1.10027	0.722215	0.792297	1.63218	0.515534	1.66484	0.608964	0.780124	1.40232	0.75436	0.565972	1.21293	0.80855	0.36782	1.05864	1.55183	0.176215	0.674086	1.99191	0.919558	1.59564	0.480533	0.434846	0.40433	0.937604
AL121772.3	0.562857	0.676589	0.65919	0.465639	0.55028	0.748876	0.733759	1.36864	0.374215	0.445923	2.06748	1.29123	0.695572	0.387393	1.49261	0.523901	0.844066	1.64443	0.387293	0.429701	1.56084	1.29068	0.225083	0.599022	1.20682	0.955453	0.6289	0.637822	0.807516	2.37869	2.00382	0.440347	0.954101	0.718545	0.599001	1.43776	0.713113	0.363333	1.95831	4.34949	0.167849	0.29288	4.52198	0.973222	1.01325	0.399037	0.552268	1.21042	0.669816
AC009133.1	4.0167	2.50767	4.61581	2.84637	7.26534	4.74181	3.712	1.65728	6.27302	1.70322	5.17037	4.86533	4.73786	4.21273	3.52443	3.62638	3.50117	0.645372	2.00729	3.17191	6.41056	2.63695	2.84832	2.7107	2.96779	3.0995	2.86854	2.74071	3.51814	2.9605	4.4291	6.48938	3.80521	4.43651	2.64287	2.48921	1.88495	3.59019	4.36043	6.07868	3.69724	1.96247	1.60945	4.62853	2.71743	1.00274	1.4899	1.71994	2.26032
AC253536.6	0.370244	0.108602	0.515482	0.298967	0.223764	0.296061	0.588894	0.356756	0.484176	0.201476	0.806162	0.498806	0.257132	0.175031	0.531081	0.426074	0.612907	0.278618	0.13896	0.231263	0.712413	0.283697	0.190681	0.322391	0.516566	0.582783	0.362289	0.324202	0.621232	0.638124	0.357379	0.391697	0.64662	0.54785	0.462794	0.574207	0.202985	0.211064	0.980543	0.829061	0.142195	0.251933	1.35017	1.08831	1.17721	0.262484	0.0935717	0.671182	0.680929
PRR7-AS1	0.131191	0.01411	0.0803679	0.0679751	0.0959383	0.0494554	0.122418	0.0973371	0.175238	0.0196324	0.224442	0.102326	0.100223	0.0255833	0.162643	0.0664285	0.0955573	0.0965308	0.0902707	0.020031	0.227191	0.138221	0.0594576	0.0418862	0.188758	0.0302869	0.0415323	0.147425	0.0864779	0.130906	0.0835776	0.0218103	0.126017	0.0355893	0.0949386	0.0508657	0.113025	0.0616998	0.0810699	0.228893	0.0554233	0.142831	0.664085	0.848379	0.88901	0.0651055	0.765902	0.218006	0.294896
AC245100.7	0.100976	0.162904	0.154645	0.224225	0.335646	0.190325	0.0588894	0.214053	0.207504	0.0755536	0.0863745	0.118138	0.144637	0.19691	0.0569016	0.351511	0.183872	0.278618	0.0347399	0.269807	0.0971472	0.478738	0	0.161195	0.387425	0.174835	0.0959002	0.364727	0.199682	0.403026	0.268034	0.0419675	0.339476	0.0913083	0.146145	0.234903	0.0869934	0.158298	0.356561	0.0518163	0.127975	0.0687089	0.771525	1.48405	0.220728	0.143173	0	0.0559318	0.680929
NIFK-AS1	2.06699	2.51811	1.11021	1.37045	1.02898	1.77258	1.80536	2.01434	1.24812	2.69738	1.81838	1.48231	1.18803	1.05068	0.883248	1.38268	1.46274	2.94628	1.15264	1.13675	1.23464	2.80733	1.57611	2.15809	1.90749	2.02408	1.2529	1.14015	1.71766	1.29028	0.759297	0.724722	1.64671	1.18701	1.21933	1.64841	1.45162	1.25161	1.59122	1.32712	1.31604	0.899882	1.06661	1.69891	1.67028	1.02091	0.462971	1.5519	1.03495
GAS5-AS1	1.76853	0.726259	1.28039	1.35666	1.00471	0.969726	1.65026	0.988378	1.35461	0.769907	1.29276	1.32926	1.22823	1.2332	2.02943	1.77063	2.28356	0.591495	1.1284	0.785539	1.26837	0.711438	0.910819	1.40307	0.586021	1.26197	1.26227	1.34212	1.84404	0.962558	1.3998	0.908771	1.38991	1.33752	1.53579	0.723099	1.24661	1.18461	1.50447	1.35305	0.869394	0.853318	0.859906	0.37807	1.05434	0.501519	0.536352	1.06867	1.08419
AC090517.2	0.328171	0.105887	0.175908	0.291493	0.283621	0.371134	0.267947	0.243486	0.202316	0.392879	0.449147	0.15358	0.344717	0.191988	0.443832	0.37388	0.418309	0.211285	0.316133	0.100214	0.536738	0.31118	0.409011	0.314331	0.377739	0.227285	0.311675	0.342438	0.411012	0.327458	0.104533	0.163673	0.0945682	0.207726	0.213738	0.22903	0.339274	0.257234	0.347647	0.437848	0.277279	0.178643	0.78358	0.192927	0.573893	0.0697969	0.0912325	0.908892	0.147535
AC092119.2	0.269404	0.193168	0.297984	0.465294	0.298502	0.394947	0.55864	0.301412	0.492109	0.44795	0.844975	0.723779	0.3716	0.301594	0.3711	0.577858	0.981145	0.344146	0.329551	0.182818	0.417583	0.614985	0.186538	0.286714	0.947514	0.742882	0.388532	0.61269	0.601813	0.955801	0.397288	0.373232	0.948853	0.216543	0.487396	0.208908	0.361043	0.234633	0.396378	0.798756	0.252917	0.132395	1.41517	0.791893	3.76244	0.244047	0.24965	0.613487	0.841076
AC093732.1	0	0.0476213	0	0	0	0.0556374	0	0.0938607	0.0454944	0	0.0378745	0.103605	0	0.0575624	0	0.0280245	0.0806265	0.0407239	0.0304663	0	0.0425983	0.0466495	0	0.0471219	0.0424706	0	0.0280343	0	0.0291863	0.132543	0.0470124	0	0	0	0	0.0343344	0	0.0347061	0.117262	0	0	0.0602567	1.8184	0.520597	0.774299	0.0941704	0.246183	0	0.199055
CIRBP-AS1	0.583709	0.820964	0.859569	0.465294	0.552229	0.394947	0.654656	0.809053	0.76123	0.335963	1.07542	0.928072	1.00761	0.598324	1.44223	0.497337	0.449691	0.16519	0.602461	0.394202	1.18795	1.27728	0.966604	0.382285	0.969049	0.466461	0.525939	0.864974	0.651142	1.18728	0.715118	0.503863	0.797899	0.791737	0.47115	1.1664	0.425515	0.563119	1.07022	1.63591	1.23297	1.08462	0.621819	0.59392	0.687054	0.907219	2.93339	0.497422	1.26161
AL078587.1	0.0823455	0.088565	0.126112	0.182855	0	0.0517366	0.0960484	0.13092	0.0846095	0	0.211315	0.224797	0.039317	0.0267633	0.185612	0.0521194	0.374868	0	0	0.0628648	0.118835	0.0433789	0.0466501	0.0438182	0.236958	0.0475258	0	0.165241	0.1357	0.205417	0.262298	0.0342244	0.0790976	0.0372309	0.0297953	0.0319272	0	0.0645457	0.254428	0.380305	0.139151	0	1.61227	1.57332	3.51006	0.116757	0.114461	0.59296	0.277648
AP000873.2	0.209256	0.15272	0.217466	0.287653	0.158988	0.328682	0.287663	0.182189	0.261082	0.156573	0.338816	0.297285	0.292599	0.170027	0.320066	0.283812	0.353828	0.144348	0.293114	0.148341	0.273222	0.283459	0.457252	0.278376	0.408606	0.276051	0.17981	0.275941	0.310356	0.507089	0.285664	0.155305	0.315861	0.19598	0.227147	0.307146	0.154525	0.216745	0.31008	0.559914	0.202063	0.122047	0.542471	1.09838	0.816826	0.105965	0.124658	0.306333	0.50397
AL137003.1	0.483593	0.907844	0.383778	0.397003	0.374104	0.541379	0.738415	0.801477	0.478821	1.01316	0.458792	0.493779	0.361041	0.394363	0.376564	0.339475	0.704481	1.78723	0.617106	0.456451	0.541391	0.870791	0.288907	1.31941	0.809653	0.811947	0.378563	0.486974	0.539015	0.886125	0.560148	0.226572	0.515194	0.286229	0.362686	0.777271	0.393904	0.392844	0.473483	0.667773	0.304592	0.424788	1.00772	0.671976	4.2861	0.37401	0.171106	1.1007	0.671986
AL021707.6	0.772639	0.782114	1.53133	1.14381	1.29924	1.0851	1.00724	1.30067	2.56844	1.15623	3.18794	1.24073	2.03984	1.03401	2.97093	1.32326	2.5656	0.37622	1.81383	1.2491	2.79847	2.05904	1.1844	1.25761	1.91819	0.839397	0.949626	2.62663	1.70767	2.04078	2.79891	0.944482	1.74627	1.56173	0.756474	2.60801	0.509026	0.890626	1.88574	2.65878	1.68965	1.11334	3.2122	2.8055	4.5701	1.15996	1.76891	2.014	5.61894
AC011451.1	1.98361	1.18524	0.928249	0.815701	0.695989	2.00789	1.28539	0.817631	0.622768	1.56666	1.88531	0.945496	1.15757	0.895415	1.8009	1.36012	1.20402	2.02715	0.606619	0.673042	1.06022	1.85769	0.998887	2.05242	1.00419	1.59006	0.662856	1.19415	1.27123	1.37452	0.877564	0.732825	0.846833	1.1958	0.677862	0.939998	1.18676	0.906987	0.826913	1.30065	0.977666	1.23727	3.31541	0.323927	1.08402	1.36722	0.15318	1.77021	1.9817
DNM3OS	0.66568	1.69627	0.231346	0.29943	0.180423	0.501885	0.937718	0.81412	0.284116	1.28736	0.363554	0.263602	0.27383	0.259625	0.323182	0.2528	0.522166	1.46943	0.320631	0.269736	0.280809	1.48902	0.591786	1.12262	0.353643	0.768396	0.259372	0.246611	0.35779	0.562044	0.201167	0.174515	0.442678	0.171324	0.24457	0.536051	0.247047	0.22477	0.669022	0.520279	0.536489	0.198606	0.254313	0.782687	0.49251	1.01647	0.0996481	0.374402	0.253226
RNASEH1-AS1	3.75592	2.62081	2.90416	1.12561	1.38855	3.56847	3.88941	2.54395	2.24021	4.82551	2.49188	1.68627	2.79932	2.1437	3.73747	2.44683	2.83583	3.15119	1.41196	2.00016	2.13285	2.20057	8.49039	3.25629	4.41109	3.17229	3.01611	2.603	2.13765	1.91958	2.08151	1.84278	3.48458	2.63422	1.7634	3.83598	2.00463	2.59937	1.77915	3.59149	2.55425	5.95918	5.79206	5.65475	5.36669	1.70156	8.09857	4.50596	5.88927
AC025181.2	4.98067	3.23207	6.51995	2.94522	3.97711	4.5803	3.50517	3.65706	4.05978	5.03835	5.09351	5.90319	5.71273	3.02052	3.76317	3.92735	4.10411	2.94309	8.90286	4.99195	5.56816	3.45928	7.59791	5.06379	5.71161	4.14328	4.47486	4.44454	5.31904	2.1934	6.02696	2.54421	4.43677	5.61091	4.59101	4.50953	5.27384	6.65215	5.0601	5.48297	4.39636	2.32882	3.53451	6.216	5.29169	1.16386	3.40359	2.62015	3.31493
AC012181.2	1.4481	1.43767	0.85299	0.797039	0.839283	1.5397	1.81901	0.708407	2.09834	0.611217	0.984612	1.88248	0.957345	0.748215	0.627716	0.634539	1.75795	0.409814	0.587631	0.481894	1.82187	0.860648	1.80903	0.632265	1.13971	0.942925	0.540722	0.774903	0.979028	1.66726	0.985617	0.524698	1.64065	1.30946	1.02107	0.489479	0.767742	0.465674	1.04892	5.29699	0.972553	1.06116	0.567411	0.436574	2.11032	0.526477	0	0.699287	2.00313
LINC01503	0.405993	0.873315	0.107203	0.466316	0.241985	0.721261	0.620519	0.222581	0.46031	0.398055	0.395188	0.556896	0.521382	0.345808	0.26823	0.434187	0.407887	0.257527	0.240826	0.224444	0.25591	1.43074	0.602763	0.372482	0.349144	0.549439	0.274785	0.382066	0.415273	0.600683	0.208105	0.209469	0.363085	0.430421	0.293804	0.303969	0.277407	0.373102	1.54485	0.416676	0.579608	0.514412	0.976083	0.823026	0.76507	3.84102	0.934074	0.635882	0.409099
AL590723.1	0.283824	0.114473	0.190171	0.157564	0.11793	0.445807	0.0413818	0.263228	0.21872	0.106183	0.303478	0.304393	0.203273	0.392046	0.279894	0.269463	0.452226	0.0326309	0.170883	0.216679	0.0341328	0.0747579	0.0401977	0.264302	0.238214	0.204762	0.29202	0.142386	0.30402	0.177005	0.263688	0.147453	0.272629	0.25665	0.128371	0.137556	0.122261	0.166854	0.250556	0.0728229	0.299761	0.289692	0.609922	0.104285	0.853083	0.25152	0.0986297	0.471641	0.0797485
LBX2-AS1	4.31536	3.09803	4.58365	5.02513	7.66693	5.67822	4.53386	3.35953	5.82031	3.82981	4.05774	6.13042	6.03301	5.59626	2.90848	6.20822	4.60174	1.40838	11.9952	8.67351	4.70805	3.48609	3.03315	3.61256	4.77611	5.46328	5.81037	4.95937	6.05619	3.6649	5.11632	5.22487	6.78858	7.21375	6.6487	2.95605	6.79905	6.70634	4.69813	5.42898	3.76376	4.75796	4.17268	2.581	4.49421	3.12769	3.18526	4.80439	4.45294
AC073651.1	0	0	0	0	0	0	0	0	0	0	0	0	0	0	0	0	0	0	0	0.0366374	0	0	0	0.0510741	0.0460327	0	0	0	0	0	0.0509554	0	0	0	0.0347292	0	0	0	0.0423656	0	0.0405484	0.0326552	0.137506	0	0.104905	0.0340229	0	0.0531653	0
AC018653.3	0.283914	0.427501	0.30437	0.266192	0.339745	0.404327	0.419469	0.341051	0.719576	0.226597	0.922867	0.442894	0.361489	0.369102	0.703958	0.527118	0.172331	0.295948	0.2735	0.173398	0.910498	0.55837	0.171565	0.261869	0.635439	0.568053	0.263651	0.288661	0.411727	0.774346	0.522519	0.236	0.52725	0.342309	0.232853	0.454996	0.326133	0.267052	0.818744	1.04898	0.383817	0.36062	2.1693	0.723271	0.992995	0.92589	0.105238	1.42586	0.595645
AL022322.1	0.389317	0.15074	0.465067	0.518707	1.00422	0.567478	0.744727	0.346623	0.78404	0.302953	1.30544	0.874537	0.550218	0.354292	1.49183	0.59139	0.964142	0.114584	1.00724	0.273438	1.78289	0.459398	0.141155	0.497197	0.791679	0.754974	0.552157	0.774986	0.410604	1.47619	0.992083	0.478951	0.882549	0.802659	0.518393	1.07474	0.375656	0.183097	1.20977	2.49326	0.263154	0.699364	3.30186	1.83099	2.85945	0.463689	0.17317	1.81144	5.74078
PLBD1-AS1	3.25748	3.2619	2.72379	2.41118	1.86689	4.28146	2.00896	2.02399	3.0008	1.51285	2.08183	2.39475	2.07377	2.65289	2.23654	2.55945	2.65905	1.17088	1.3397	2.20101	4.14261	1.93298	2.84237	1.51423	4.63301	4.23554	2.91594	4.11739	4.14641	3.51194	2.18655	1.40056	3.41673	2.94561	2.95344	2.72924	2.22578	2.70009	2.37986	3.68904	1.29707	1.83439	2.68205	1.43077	1.63694	1.88467	0.936816	0.290357	0.589148
LINC01235	0.0086629	0.204979	0.0199009	0.775882	0.143979	0	0.232403	0.0367281	0.0534065	0.285203	0.0889228	0.270275	0.215083	0.0844665	0.615093	0.625069	0.489017	0.0398386	0.345727	0.357129	0.0333378	0.164287	0.84412	0.0276585	0.0581663	0.129995	0.230369	0.347674	0.325491	0.0345764	0.0275942	0.288038	0.191388	0.235006	0.0250762	0.033588	0.231363	0.0679033	0.894759	0.0977992	0.497725	0.848833	0.049643	0.611135	0.34086	0.626438	0.0722493	0.556626	0.369982
MED8-AS1	0.183165	0.0328333	0.163636	0.158174	0.182654	0.11508	0.320468	0.226498	0.250935	0.365469	0.496151	0.333352	0.291516	0.178593	0.240839	0.038644	0.277946	0.0842334	0.168044	0.0233056	0.675512	0.546776	0.0345887	0.194934	0.234257	0.211428	0.173958	0.294044	0.181107	0.335074	0.259308	0.17763	0.293235	0.165629	0.220917	0.733844	0.105201	0.0717862	0.323392	0.532623	0.232141	0.33236	0.612286	0.628134	0.867512	0.562704	0	0.473469	0.480345
AL049840.7	0.161708	0.130441	0.154785	0.418933	0.107504	0.0507994	0.377234	0.599893	0.290769	0.362986	0.864527	0.378385	0.231628	0.183949	0.729	0.153526	0.368077	0.706472	0.305988	0.092589	0.583411	0.511116	0.0916099	0.68839	0.426553	0.139995	0.204772	0.227147	0.186538	0.645425	0.343395	0.134418	0.194162	0.146226	0.204789	0.75237	0.278631	0.126753	0.713768	0.456396	0.13663	0.0825254	0.270278	0.118832	0.0883711	0.601872	0	0.806148	0.545237
AP006621.2	1.02149	0.169022	0.481359	0.523456	0.156714	0.394947	1.00817	0.333139	0.484419	0.705522	1.41149	0.858028	0.750345	0.204306	0.177116	0.0497337	0.429251	0.578165	0.811006	0.239949	0.982761	1.73852	0.356117	0.919873	1.50741	0.997708	0.199004	0.63071	0.880522	0.627244	0.250291	0.326578	1.9624	0.710533	0.284315	0.609314	0	0.184774	0.624295	2.01609	0.132782	0.641606	1.80113	1.84775	2.40469	0.612771	0	0.957537	0.706504
AC131971.1	0.0150578	0	0.023061	0.0445828	0.0100105	0	0.035127	0.0319202	0.108302	0.0450671	0.0772825	0.0587238	0.0575163	0.0587276	0.0678826	0.0190612	0.0548391	0	0.0621662	0.0344866	0.0579475	0.0475938	0.0682438	0.0961517	0.0433304	0.0869062	0.00953393	0.024173	0.0694799	0.150251	0.0959281	0.0250332	0.0578555	0.0953131	0.0326904	0.128441	0.0389181	0.0590145	0.0664642	0.0927239	0.038168	0.0512304	0.129434	0.132784	0.230409	0.0427008	0	0.0333628	0.203084
AL354836.1	0.557072	0.740123	1.00371	0.412342	0.348559	0.452942	1.5671	0.764117	0.707067	1.12787	2.27047	0.945685	0.625838	0.596417	1.18181	0.518516	1.19341	1.47683	0.428408	0.625417	1.79701	1.38099	0.334154	1.56935	0.754368	0.529554	0.414957	0.736477	0.864017	0.850142	1.0438	0.490299	0.97577	0.414843	0.497989	1.27052	0.367007	0.719197	1.4464	2.35418	1.24592	0.847309	2.66026	3.46759	4.08298	1.02218	0.455492	2.03293	8.24981
AC015813.1	0.698804	0.272552	1.02612	0.693458	0.380333	0.738181	1.28533	0.716261	0.80481	0.775686	2.0593	1.22487	0.714971	0.62146	1.57948	0.515204	1.30745	0.861677	0.649921	0.35468	1.37048	1.59385	0.23927	1.18911	1.17486	1.06812	0.719592	0.810547	0.812436	1.65127	0.94989	0.580873	1.20602	0.583292	0.677972	0.777095	0.648349	0.740366	1.59308	2.78601	0.282241	1.06335	3.6928	1.10604	6.21931	1.06977	0.298876	2.9052	4.5225
AC124067.4	3.90219	1.31154	4.23076	3.31886	1.80222	4.50263	2.06789	3.35058	1.81197	1.30547	2.8244	3.59967	1.90794	2.04873	6.23741	3.25353	6.09792	0.362356	3.53056	1.51816	5.34257	1.27489	6.54693	2.74531	5.29057	5.96604	3.10025	4.7811	3.55536	3.80948	4.25281	1.48927	2.31564	2.85002	5.06398	3.90606	3.95178	3.11016	2.61673	3.54276	2.07651	6.91257	15.0421	6.14869	11.9953	0.305905	1.46033	0.727419	1.1386
DGUOK-AS1	5.26288	2.58047	3.81275	2.11964	1.66364	2.26923	1.59485	1.77739	2.70379	1.46705	2.75849	2.43479	1.28105	1.52604	2.61681	2.02476	2.91262	0.332194	0.727811	0.945371	4.31873	1.71239	5.23225	2.11411	3.9346	4.49666	2.38483	2.1536	3.11204	3.32077	2.24616	1.77991	2.3294	2.3795	2.5017	4.04105	1.77808	1.59753	2.39133	3.68033	2.39774	1.26393	1.10879	1.97165	1.97379	1.92042	3.44258	1.71481	1.10182
TBILA	0.449308	0.123909	0.644007	0.545766	0.79654	0.955458	0.618141	0.634977	0.662898	0.293087	0.955916	0.988451	0.528069	0.486769	1.50617	0.73648	1.19579	0.0741735	0.88785	0.580486	1.48524	0.534073	0.23496	0.674352	1.5913	0.930888	0.612731	1.2484	1.07078	1.26453	1.3945	0.450094	1.02917	0.614646	0.416858	1.31325	0.486345	0.921101	1.07806	2.41207	0.33096	0.399803	3.22397	1.11752	2.14062	0.0571732	0.128112	2.0676	1.16535
AC069234.4	0.270821	0.23302	0.788049	0.561289	0.0360086	0.136123	0.189532	0.40187	0.389574	0.0810551	0.463319	0.380222	0.517228	0.316873	0.549404	0.239977	0.591783	0.0996353	0.409965	0.124051	0.677437	0.342398	0.12274	0.461155	0.467589	0.250087	0.342944	0.56519	0.357036	0.648559	0.517593	0.54028	0.676362	0.342849	0.313574	0.420013	0.559967	0.21228	0.478155	0.83384	0.411881	0.331704	1.60368	0.636846	0.3552	0.345596	0.602311	0.240018	0.60876
AC120053.1	0.667044	0.358712	1.11445	0.987486	0.80628	1.56208	1.59146	1.44617	1.15269	1.1797	1.76364	1.44259	1.15814	1.04457	0.751781	1.28578	1.82198	2.03575	0.563296	0.717565	0.991799	1.27779	0.137415	2.00063	0.727079	1.15495	0.95987	1.48457	1.13922	1.36144	0.869218	0.504066	1.16497	1.04186	1.27262	0.775882	1.07099	1.09324	2.2216	1.12025	0.435509	0.90778	4.02522	2.04985	3.51275	0.98879	0.337163	2.48562	1.97648
AC025171.1	1.26648	1.07764	0.883874	0.539918	0.809987	1.1986	0.766663	0.620209	0.988327	0.815675	0.891358	0.825271	0.941489	0.708613	0.659478	0.766085	0.49627	0.589795	0.562577	0.734326	0.886852	1.39345	0.626659	1.04928	1.51466	1.36937	0.624247	0.784944	0.813694	0.96779	0.561717	0.439754	0.96244	0.652343	0.69608	0.907493	0.718195	0.64715	1.12511	1.39029	0.961713	1.1563	0.643076	0.329861	0.525656	1.03425	0.713081	1.65168	0.666662
TPT1-AS1	0.667195	0.532999	0.565117	0.581193	0.561931	0.636198	0.608064	0.709451	0.575324	0.597137	0.895531	0.79984	0.514205	0.514575	0.739862	0.627327	0.773493	0.7794	0.950649	0.509355	0.885448	0.734588	0.408361	0.748877	0.742865	0.931108	0.544688	0.85583	0.766464	0.794186	0.797249	0.367355	0.861375	0.760452	0.552689	0.672085	0.632103	0.598646	0.804893	1.03703	0.375215	0.308015	5.12447	2.15035	3.7282	0.517114	0.22067	0.986308	2.35812
AL139407.1	0.265889	0.142985	0.174518	0.12652	0.088382	0.143189	0.310134	0.362342	0.0780568	0.170526	0.389898	0.340708	0.163224	0.0740718	0.278261	0.0601037	0.242085	0.209616	0.0914768	0.115992	0.347167	0.200097	0.215186	0.323397	0.309692	0.328838	0.0601246	0.167688	0.212824	0.341114	0.282314	0.142082	0.145944	0.223258	0.123695	0.162	0.130897	0.119094	0.452681	0.643228	0.0481404	0.0775388	0.326503	0.669908	0.788797	0.188501	0	0.315598	0.554982
AL359513.1	1.36217	0.64635	0.276111	0.415173	0.106539	0.90618	0.280386	0.297254	0.905641	0.359727	0.411248	0.468736	0.497356	0.364596	0.361228	0.405727	0.364773	0.221094	0.330809	0.183516	0.23127	0.379896	1.13484	0.596934	0.345865	0.647443	0.304401	0.611008	0.31691	0.239862	0.0850781	0.432936	0.692708	0.144913	0.376908	0.372808	0.241614	0.439653	0.318312	0.616772	0.406212	0.272615	2.56373	0.942121	1.83913	0.426049	2.78447	0.266304	1.62103
SCARNA9	0.126434	0.203976	0.242043	0.233965	0.546352	0.158874	0.442422	0.469038	0.389731	0.189205	1.5682	0.345156	0.241471	0.287649	2.56492	0.520161	0.690693	0.348865	0.304491	0.144785	0.729843	0.532835	0.214881	0.201837	0.424466	0.145943	0.480316	0.304456	0.333369	1.00928	0.335612	0.105097	0.485789	0.171494	0.274488	0.931405	0.16339	0.445969	0.948725	0.843446	0.160241	0.516193	2.53587	2.60151	8.29136	0.268906	1.23022	0.350168	4.97355
AC009269.5	0.113855	0.0408182	0	0	0.100922	0.0476892	0.0442672	0.160904	0.116986	0	0.259711	0.0592031	0.108724	0.148017	0.171092	0.0720631	0.345542	0	0.104456	0.0289734	0.109538	0	0	0.0403902	0.0728068	0	0.0480588	0.182777	0.0500336	0.113608	0.201482	0.220829	0.0364549	0.102955	0.0274644	0.264865	0	0.0892444	0.20102	0.116851	0.0641326	0.0774728	0.108742	0.223113	0.746646	0.188341	0	0.126132	0.0853092
GPRC5D-AS1	0.927641	0.555061	0.865417	1.26689	0.590643	1.18207	1.05915	0.484691	0.845749	0.694094	1.15673	1.29931	0.879591	0.75586	0.971857	1.00888	1.3799	0.222313	0.683245	0.349106	0.578219	1.19759	1.08805	0.771718	0.94619	0.897342	0.864468	1.2742	1.17128	0.632294	0.589582	0.591894	1.2048	1.06921	1.21023	0.744662	0.956774	0.880739	1.06112	1.22023	0.463647	1.03572	2.52067	0.691284	1.05673	0.986474	0.490348	0.926346	1.38033
TONSL-AS1	0.469254	0.112155	1.27762	0.308747	0.901225	0.720686	0.547342	0.552638	0.535729	0.234075	0.847398	0.976022	0.69705	0.643945	1.05773	0.495013	0.664603	0.0959106	0.502268	0.318437	1.55504	0.219732	0.649831	0.221958	0.550134	0.300923	0.429161	0.627763	0.549903	0.93647	0.830406	0.303382	0.801326	0.75436	0.452777	0.444742	0.449195	0.408689	0.552336	1.23076	0.704859	0.567652	0.298786	0.766299	0.341922	0.702318	0.434846	0.808659	1.75801
CARD8-AS1	2.56137	4.02253	0.902578	1.2164	1.19046	2.09348	1.69209	0.985037	2.7366	2.03523	1.38634	1.34366	1.91561	1.11979	2.04372	1.84356	1.79548	0.646288	0.896816	1.08154	1.24303	1.69559	5.27773	2.2676	2.71778	2.61646	1.64327	1.43734	1.29991	1.47015	1.52827	1.3566	2.17729	1.06584	1.35327	1.07219	1.47438	0.692924	1.32067	2.39613	2.12586	1.57322	1.09327	1.96552	1.56079	1.99264	0.441104	1.14255	1.37569
C1RL-AS1	0.410133	0.425356	0.445853	0.379474	0.270224	0.34971	0.448483	0.423066	0.647164	0.361675	0.673463	0.451281	0.412628	0.373711	0.511759	0.447326	0.386753	0.215555	0.201576	0.184509	0.78212	0.582575	0.2199	0.342952	0.825439	0.718581	0.408066	0.449715	0.405524	0.621172	0.388813	0.334831	0.534655	0.350999	0.397499	0.508288	0.362805	0.281294	0.60128	0.924531	0.380565	0.301501	1.49341	0.269097	0.600355	0.604891	0.162883	0.888429	0.197552
SNHG11	2.52271	2.37195	1.71915	1.43864	1.61382	2.48214	1.64706	1.65646	2.33123	2.07752	2.55829	2.32035	1.99992	1.60888	1.68087	1.2603	1.96462	1.37173	2.30899	1.41112	2.53391	2.18147	2.72348	1.68011	2.03171	2.60978	1.66759	2.07585	1.97666	1.91563	2.02155	1.28588	2.33938	1.72165	1.89449	1.907	1.78381	1.74111	1.84184	3.87548	2.04435	3.14166	4.80366	4.31394	4.69947	1.58038	2.86703	3.22535	4.51153
AC084824.6	0.648396	0.697369	0.620638	0.15998	0.323293	0.339482	0.441172	0.400897	0.832779	0.646871	1.06306	0.674314	0.928756	0.561965	0.791662	1.06018	1.1807	0.745455	0.594869	0.495004	0.571828	0.740067	0.183663	0.460038	0.984743	1.0603	0.547382	0.954159	0.676726	0.862651	1.20479	0.449143	0.622822	0.390879	0.586528	0.837991	0.558611	0.508239	0.715496	1.38637	0.502191	0.588268	2.06425	0.79413	1.53547	0.383066	0.600853	0.77817	0.485828
AC012615.6	0.263714	0.224949	0.598854	0.309627	0.314364	0.445643	0.509127	0.45301	0.532585	0.217732	1.22902	0.758929	0.39945	0.254175	0.953136	0.362606	0.546446	0.21746	0.3504	0.340172	1.28607	0.316167	0.24728	0.367758	0.532077	0.461857	0.397278	0.518241	0.575448	0.644242	0.888293	0.279681	0.94337	0.715397	0.27639	0.373732	0.30554	0.470442	1.22021	2.19322	0.338068	0.315574	0.677442	0.588058	0.695734	0.30945	0.176963	0.332446	1.32865
AC093227.1	0.656342	0.476493	0.816717	0.89877	0.349072	0.927835	1.55026	0.66089	0.691247	0.491099	1.10883	0.947076	0.705104	0.66129	0.628762	1.01778	1.70312	0.739499	0.429038	0.488543	1.01033	0.795237	0.52056	1.34464	0.960086	1.47735	0.75841	1.08	1.03835	1.30983	0.85369	0.327346	1.05601	0.816068	0.795579	0.699815	0.989549	0.450159	1.15882	0.926216	0.402055	0.692243	2.57014	0.81994	2.61838	0.53511	0.0912325	1.05431	1.69665
AL162595.1	0.347776	0.249362	0.41426	0.300326	0.282582	0.582675	0.405649	0.266223	0.178669	0.260218	0.347069	0.391817	0.258301	0.188386	0.435506	0.305722	0.562919	0.0533113	0.186122	0.177001	0.44612	0.325698	0.656736	0.185061	0.518914	0.624461	0.42816	0.449743	0.483962	0.424137	0.307717	0.208784	0.389736	0.366893	0.237692	0.419503	0.249682	0.333179	0.460519	0.495732	0.261195	0.276085	1.64233	0.681508	0.46458	0.150673	0	0.877572	0.521161
ITGA6-AS1	0.207202	0.0222852	0.158665	0.245392	0.0964242	0.208291	0.26585	0.175695	0.830305	0.21705	0.0886201	0.501	0.336366	0.148155	0.256876	0.380322	0.377305	0.0762298	0.0427717	0.332186	0.139542	0.0654912	0.35215	0.264618	0.298123	0.143504	0.30174	0.582104	0.341455	0.227427	0.286003	0.172234	0.378156	0.393465	0.119956	0.096404	0.214212	0.24362	0.164624	0.467838	0.245097	0.15509	0.138527	0.487243	0.317053	0.396618	0	0.252498	0.605481
AL122035.1	1.0955	1.61462	1.05636	0.57062	0.21579	0.764761	1.79838	1.67721	1.08393	1.76081	0.798257	0.854463	0.542431	0.791221	0.914563	0.564975	0.369416	2.42567	0.697956	0.526579	0.78071	1.66717	0.735544	1.59769	0.972964	1.63921	0.590861	0.423378	0.695377	1.74089	0.818528	0.505899	0.857418	0.330204	0.675324	1.25851	0.838932	0.604265	0.573091	0.666263	1.1313	0.579779	0.387516	0.477056	0.532155	0.978003	0.563982	1.03382	0.912033
AL133520.1	0.60571	0.37716	1.14735	0.849494	0.445067	0.440648	0.929612	0.844747	0.589607	0.811014	1.30894	0.770825	0.821949	0.683841	1.50903	0.726396	0.928817	0.733031	0.329037	0.462416	1.31884	0.705341	0.433446	1.4589	0.947945	0.809569	0.504618	1.12591	0.714481	0.795256	0.744676	0.556489	0.612442	0.663029	0.484472	0.865226	0.878881	0.724664	0.816142	0.687084	0.808071	1.27985	3.41014	1.59302	1.74217	0.339014	1.06351	0.565071	1.28988
AC092747.4	1.85864	1.54763	2.31394	1.95269	2.3198	2.01909	2.67145	2.5928	2.2424	2.13539	2.20531	2.29146	2.23289	2.22146	2.27044	1.93537	3.16614	2.58077	2.84658	1.49217	1.97275	2.26144	1.0054	4.07097	2.00135	1.55025	1.99678	2.50251	2.24482	2.71609	2.1899	1.83403	1.8314	1.95177	2.06528	1.92479	1.91119	2.2934	2.3712	2.006	2.0162	2.18672	2.29053	1.40989	4.16774	2.57585	1.26676	1.0893	1.9407
AC009032.1	0.155329	0	0.0792957	0.0766494	0.0344212	0	0	0.164637	0.1064	0	0.132868	0.080769	0.0494427	0.235592	0.116708	0.0655423	0	0.0476215	0.0356265	0.0790551	0	0.0545507	0.0586643	0.0551031	0.0993281	0.0597657	0.163913	0	0.0341297	0.361648	0.10995	0	0.0497343	0	0.0374688	0	0.0446068	0.0811689	0.0914153	0.106278	0	0.0352313	0.098902	0	0.226361	0	0	0	0
AC009812.4	0.482166	0.13297	0.889913	0.466712	0.706846	0.49713	0.447038	0.445539	0.673267	0.407027	0.930643	0.742516	0.554881	0.779532	0.613087	0.743388	1.53088	0.397989	0.0510417	0.698444	0.868297	0.455899	0.224127	1.10524	0.486212	0.385315	0.649713	0.5458	0.537869	0.666165	0.892636	0.411072	0.629407	0.491901	0.65312	0.498523	0.628425	1.02722	0.698504	0.900886	0.344717	0.117776	0.87379	0.654135	1.08102	0.175298	0.274961	0.561549	0.555809
LINC00578	1.26588	5.01806	0.443131	0.481885	0.120223	0.477201	1.96168	3.68019	0.241555	5.27712	1.17565	0.63473	0.138151	0.693547	0.387244	0.320488	0.493951	6.37036	0.684382	0.717902	0.591543	2.17204	1.86457	2.48272	0.190808	1.23159	0.1832	0.101609	0.417217	1.29922	0.115207	0.255546	0.191078	0.245289	0.314082	1.34622	0.420656	0.963897	0.686466	0.315517	0.825097	0.123052	0.138174	0.956818	0.276715	2.39745	0.452466	0.56095	0.0812995
AL451165.2	4.54417	3.11299	2.32719	3.14934	2.28979	4.43713	2.36321	1.84069	3.56874	3.2052	2.55012	2.18982	2.29405	2.16363	2.0551	2.41818	1.89739	1.86348	4.10264	2.56319	2.00494	2.47006	5.50943	2.92633	2.58195	3.10712	1.85092	3.299	2.57566	1.87726	2.36635	1.37137	2.83582	3.3501	3.079	2.1322	2.41878	2.83591	2.06965	2.58436	1.68741	1.91039	3.92542	2.89265	3.29002	1.3543	3.78183	2.30866	2.34219
LINC01569	0.796285	0.285476	0.459199	0.58213	0.365987	0.617648	0.642128	0.385532	0.555553	0.411917	0.773642	0.690095	0.450604	0.274778	0.664771	0.441775	0.59074	0.334546	1.08229	0.25517	0.822841	1.1186	0.456677	0.460342	0.810946	0.896459	0.323667	0.757519	0.49249	0.539513	0.386206	0.253321	0.802649	0.417806	0.419733	0.434519	0.736838	0.470046	0.911233	0.797058	0.340553	0.882986	1.95294	0.953586	2.81511	0.306655	0.57392	0.773239	1.34796
AL442067.1	0	0.107628	0.153258	0.0740715	0	0	0	0.212134	0.308464	0.599008	0	0.0780526	0.191119	0.130096	0	0.126676	0.546669	0	0	0	0.192552	0	0.226765	0.213	0	0.115511	0.0633601	0.240971	0	0.0998528	0	0.166364	0.0961231	0	0	0.310395	0.25864	0	0	0.205406	0	0	0.382303	0.294149	0.437497	0.212834	0	0.11086	0
AC103591.3	0.213547	0.344514	0.163524	0.790332	0.354918	0.536674	0.124541	0.113172	1.86505	0	0.274001	0.666248	0.203922	0.416432	0	0.675807	0.194429	0	0.514284	0.244541	0.102725	0.449978	0.725866	0.113634	0.512086	0	0.202813	0.257113	0.351911	0.319625	0.226739	0.443771	0.410248	0.0965509	0.309073	0.24839	0.0919882	0.167387	0.282775	0.876662	0.451076	0.36327	1.01978	0.313852	1.86721	0.22709	0.890498	0.236573	0.480017
AC132192.2	0.389113	0.313877	0.506539	0.43203	0.310421	0.513397	0.544637	0.226837	0.69967	0.320263	0.615767	0.561475	0.334417	0.26558	0.306981	0.320169	0.81484	0.214733	0.227581	0.222795	0.580258	0.348468	0.176351	0.351997	0.634505	0.561443	0.443465	0.609045	0.38474	0.660056	0.557755	0.404307	0.710155	0.263894	0.253429	0.241388	0.201139	0.228752	0.291979	0.718833	0.361648	0.410397	0.984838	1.31533	1.10576	0.17931	0.486785	0.840586	1.09333
AC093157.1	0.966487	1.41133	0.866445	0.808449	0.464917	1.10585	0.907354	0.591323	0.99306	1.16411	1.14936	0.759968	0.667807	0.541411	0.770455	0.726112	1.14467	0.823885	0.329809	0.389917	0.982761	0.968601	2.03877	0.861336	1.05519	0.997708	0.646763	0.996522	0.662981	0.948707	0.57567	0.509462	0.898176	0.781586	0.847257	0.840853	0.629568	0.726776	1.13067	1.11288	0.902915	0.545365	4.21765	1.61678	2.69669	0.869021	0.415043	1.02718	2.15484
AC005550.2	1.68127	0.891305	1.35135	1.28419	2.57234	1.32602	0.250347	0.789905	0.606463	1.16877	0.974073	1.00909	0.768587	1.11225	0.456915	1.32829	2.38842	0.0712859	3.06445	4.77455	0.980842	0.326634	1.21592	1.2119	1.098	1.43144	1.09848	1.59836	1.54448	0.261757	2.37385	1.18444	1.82685	2.18342	1.19511	1.3176	3.99098	2.53289	0.557894	1.59702	0.98733	0.847875	0.193603	0.438119	0.260651	0.046494	0.14917	0.171725	2.76071
AC021078.1	0.749367	0.608643	0.718275	0.69813	0.669971	0.850719	0.916264	0.687457	0.825727	0.676711	1.39695	0.955339	0.607018	0.614763	2.21625	0.639489	1.77864	0.658336	0.78411	0.374816	1.25794	1.08082	0.465517	0.739764	1.13272	1.04098	0.696975	1.08062	0.747759	1.92607	1.34714	0.66801	1.08964	0.586494	0.61335	2.21015	0.601076	0.52662	1.17023	2.19322	0.578575	0.574964	1.92748	1.67102	2.7226	1.11748	0.316081	1.58018	1.16169
AL136531.1	0.278946	0.600028	0.356005	0.172062	0.185444	0.292096	0.433819	0.344938	0.191077	0.556578	0.437451	0.471405	0.266373	0.241762	0.366778	0.353109	0.253973	0.598642	0.223928	0.0354924	0.313097	0.440838	0.263378	0.445302	0.713507	0.429317	0.264924	0.261219	0.459684	0.4639	0.098726	0.193225	0.625201	0.210199	0.201863	0.252358	0.320426	0.25509	0.451458	0.524856	0.157125	0.0949042	0.62164	0.136657	0.711387	0.263677	0	0.309023	0.522519
ARHGAP27P1-BPTFP1-KPNA2P3	0.455421	0.26861	0.584982	0.41322	0.51275	0.636881	0.625453	0.615069	0.973622	0.318778	1.07445	0.670332	0.610254	0.572971	1.67228	0.576505	1.1637	0.297266	0.500378	0.297211	1.51234	0.781648	0.499361	0.680119	1.02869	0.729188	0.446482	0.843134	0.760189	0.945512	1.16989	0.38467	0.783192	0.544664	0.478412	0.734787	0.272119	0.333947	0.985648	1.71884	0.626845	0.459839	2.47651	1.25231	1.05976	1.12484	0.265469	2.97834	0.544878
AC135050.6	14.7	9.4925	10.8271	8.19342	10.5772	17.804	9.22726	9.47993	11.4343	7.99529	13.2056	11.5347	10.4012	9.65129	15.3032	11.3032	14.4053	5.99999	7.02757	8.2027	16.8405	8.42801	16.5552	11.4977	12.3448	16.9001	10.2232	11.515	11.2464	13.4604	11.7218	9.47111	11.9653	11.5576	10.6806	10.7123	9.8925	9.48634	11.9086	14.4809	10.1009	7.61242	14.519	14.5767	28.1329	3.78774	6.81106	8.96004	13.1376
CYTOR	1.14936	1.85425	0.548841	0.798176	0.562343	0.787037	0.647716	0.438017	1.67855	1.34313	0.552337	0.800784	1.36269	0.730323	0.822339	0.743818	1.29338	0.362273	0.448744	1.57744	0.44107	0.789154	5.65532	0.5635	1.44931	0.640994	0.494689	0.881096	0.706552	0.566988	0.904988	0.638717	0.967573	1.07435	0.92988	0.265376	0.917886	0.789565	0.598524	0.662697	1.00931	2.24519	1.82545	4.65012	2.34306	6.59651	3.1414	1.55942	2.26425
AC129510.1	0.0402084	0.172981	0.461844	0.14881	0.106923	0.454723	0.468993	0.468796	0.702335	0.180512	0.584701	0.689956	0.19198	0.313637	0.317213	0.101797	0.29287	0.443781	0.442668	0.122785	0.851045	0.720167	0.0911147	0.556294	0.732791	0.324888	0.407331	0.451838	0.344556	0.682058	0.555	0.100268	0.540714	0.254512	0.203682	0.249434	0.381047	0.220618	0.851891	0.78406	0.169865	0.109439	0.92166	0.354568	1.05472	0.798158	0	0.623614	1.35572
CARMN	0.371694	1.46933	0.15359	0.0851333	0.118423	0.0687372	0.852368	2.71317	0.0619708	1.19851	1.62692	0.240682	0.0991154	0.279903	0.316159	0.038174	0.406102	3.19548	0.297257	0.358717	0.318467	2.04524	0.216133	1.16583	0.193737	0.485713	0.0772626	0.0596697	0.120194	1.04548	0.314235	0.0617932	0.137424	0.0963931	0.152254	0.502494	0.199385	0.222084	0.482904	0.259114	0.218059	0.0381764	0.0294717	0.0948264	0.0674531	0.169045	0.0116979	0.104108	0.100891
AC025580.2	1.18297	0.772038	1.0114	1.16467	0.641372	1.55143	0.797083	0.438242	0.831965	0.489835	0.766301	1.30789	0.828044	0.903341	0.582487	0.777822	0.805186	0.0264087	0.331915	0.780359	1.18784	0.526374	0.487989	0.745608	1.21182	1.08047	0.650834	0.797428	0.923627	1.03142	0.609734	0.706471	1.01496	1.293	0.67738	0.55663	1.03895	0.684191	1.40931	1.39091	0.611356	0.367308	0.619766	0.438877	0.376589	0.158776	0.399113	0.0827031	0.425975
SLC12A9-AS1	1.02809	1.0407	0.879882	0.581933	0.482457	1.29187	0.493777	0.2564	0.745664	0.362002	0.620773	0.51887	0.462001	0.43242	0.545268	0.612439	0.110124	0.278115	0.291288	0.138507	0.930928	0.318582	1.57599	0.77234	0.87013	0.767884	0.49778	0.776679	0.637827	0.603447	0.385272	0.90486	0.87136	0.601546	0.525173	0.750331	0.625221	0.568842	0.694038	0.496538	1.02195	2.22215	2.83023	3.37753	1.85076	0.428743	4.20312	1.47393	3.67037
AC015871.3	1.32255	0.838606	0.808687	1.00817	0.793942	0.967367	1.36995	1.04613	0.659176	1.68377	1.56188	1.7321	0.83882	0.654393	1.09011	0.905809	1.63549	1.1438	0.977942	0.610326	1.74719	1.36222	0.827528	1.50207	1.70409	1.20763	0.86863	1.1408	1.02143	1.31968	1.23659	0.582496	1.38416	0.758614	0.728529	1.17864	0.943845	0.820053	1.99527	2.57289	0.633781	0.537273	1.96072	1.36354	1.89859	0.972609	0.192068	1.15901	1.10928
AC004148.1	0.633313	0.371534	0.723031	0.673332	0.48227	0.752397	1.34309	0.781107	0.946509	0.620335	1.6843	1.49089	0.824683	0.583821	1.51837	0.765252	1.67743	0.900213	0.570466	0.369209	1.52879	1.00694	0.182652	0.710768	1.21495	1.07662	0.714484	1.02593	0.865288	1.59708	1.13703	0.612578	1.18348	0.66639	0.624964	1.02684	0.872986	0.640828	1.12833	2.30446	0.457267	0.720841	2.61743	1.21849	4.48039	0.62858	0.384137	1.73487	2.87304
PVT1	0.434694	0.410724	0.255095	0.249588	0.183655	0.454336	0.345918	0.340175	0.53013	0.273578	0.66027	0.345389	0.515966	0.219183	0.581488	0.426842	0.480853	0.295187	0.232017	0.266726	0.273597	0.295336	0.584582	0.428035	0.674149	0.379843	0.396124	0.436962	0.299929	0.563469	0.250185	0.297172	0.585349	0.308583	0.235195	0.381184	0.311501	0.286596	0.537957	0.316878	0.52518	0.887362	2.4173	3.64219	3.64991	0.766118	0.959992	1.56621	3.34229
AL117332.1	0.389493	0.443552	0.456154	0.15263	0.213242	0.143949	0.454307	0.315696	0.423743	0.377148	0.372368	0.393148	0.546966	0.342537	0.542259	0.493048	0.166882	0.210728	0.268004	0.192403	0.242469	0.410362	0.389389	0.268218	0.461509	0.343806	0.362662	0.331026	0.558795	0.297201	0.316248	0.209493	0.638222	0.290049	0.464244	0.355329	0.453991	0.646518	0.404517	0.517312	0.406524	0.576831	0.371999	1.81835	0.600996	0.649718	0.764329	0.71069	0.772512
LINC01811	0	0	0	0	0.026142	0	0	0.0208396	0	0	0.0168183	0	0	0.0127804	0.022159	0.0124444	0	0	0.0135287	0	0	0.0207148	0	0	0.0188592	0	0	0.0157817	0	0	0	0	0	0	0.0142282	0	0	0.0154114	0	0.0201787	0	0.361221	0.713576	0	0.816596	0.0975722	0.0546591	1.30688	0.0441954
AC108673.2	0.35547	0.509758	0.604893	0.409294	0.498895	0.347414	0.230346	0.251181	0.730487	0.41374	0.472996	0.277259	1.01834	0.487803	1.60251	0.549975	0.503452	0.435926	0.244594	0.452293	0.45599	0.374517	0.581763	0.420344	0.303083	0.227956	0.475144	0.634059	0.728986	0.354698	0.712924	0.919274	0.417328	0.464299	0.457319	0.459412	0.27222	0.464387	0.278938	0.526967	0.734177	0.215004	0.905347	0.696586	0.863378	0.392016	1.09802	0.306289	0.44391
N4BP2L2-IT2	0.196232	0.13743	0.174726	0.189163	0.175964	0.33833	0.34599	0.207991	0.225072	0.136584	0.538701	0.234924	0.174313	0.154253	0.324025	0.248404	0.415498	0.277023	0.248067	0.0975498	0.219525	0.307715	0.0879005	0.213697	0.341433	0.316061	0.219596	0.227107	0.333906	0.632952	0.285882	0.132768	0.276162	0.173318	0.158518	0.261868	0.161196	0.139506	0.551922	0.63697	0.0925398	0.130421	1.91777	0.563394	1.28686	0.26853	0.0507469	0.323558	0.953997
AC023043.4	0.347905	0.748364	0.532818	0.331095	0.528661	0.499621	0.405799	0.316074	0.561739	0.595006	0.722737	0.581483	0.427145	0.839975	1.00826	0.314574	0.633519	0.18285	0.649768	0.455315	0.717245	0.785457	0.22525	0.740518	0.429058	0.114739	0.346152	0.598402	0.589706	0.595114	0.633254	0.950204	0.477405	0.404482	0.575468	0.346861	0.642278	0.545404	0.438753	0.714119	0.587906	0.744015	1.04431	0.584367	2.28151	0.458058	1.24352	0.715778	0.558594
LINC02035	0.868012	0.464594	1.48539	0.87778	1.12702	1.34164	1.09801	1.61977	1.0803	1.35384	1.21658	1.44306	1.02735	1.27415	0.688929	1.18907	1.20215	1.67542	1.11602	1.38133	1.14483	1.53708	0.286273	1.79119	1.1844	1.15718	1.09917	1.55701	1.16583	1.31749	0.938943	0.735075	1.39745	1.05391	1.21501	0.910099	1.48159	1.41826	1.26633	1.66459	0.874574	0.615595	1.40506	0.467168	0.944261	0.933175	0.634429	0.573352	0.833587
AC007383.1	1.87762	1.76411	1.15684	1.02239	1.09043	2.00682	1.28384	1.28101	1.53009	1.55024	1.43996	1.58234	1.44264	0.925897	1.11888	1.10645	1.84708	1.64755	1.06921	1.12038	1.66109	1.27334	1.95623	2.18201	2.25645	1.34525	0.983858	1.43782	1.55066	1.22749	1.32908	0.825225	1.47187	0.97578	0.905847	1.22169	1.32013	1.37025	1.60039	1.52833	1.27645	0.851752	4.18435	2.66441	1.13224	0.933326	0.599981	1.88881	1.45537
LINC02298	4.34178	1.03998	2.30844	3.26991	2.57133	3.6213	2.21148	1.18566	1.96758	1.84423	3.03279	2.73582	1.91915	2.09513	3.0984	2.46006	2.83104	0.71497	4.68348	1.83825	4.45078	1.638	3.35119	2.28011	2.45514	3.02017	1.78867	2.8002	2.61204	1.8351	2.0735	1.24505	2.38577	3.12031	3.29293	1.01445	2.43382	3.34382	2.59431	3.11338	1.60195	3.54782	9.32574	2.78654	3.02549	0.389803	3.53148	2.12142	1.6195
AC073896.3	0.306393	0.604147	0.664759	0.680373	0.407384	0.320838	0.595632	0.541256	0.577165	0.229254	0.30577	0.7966	0.585166	0.398326	0.863289	0.420176	0.46494	0.375741	0.351374	0.272894	0.589553	0.968431	0.578589	0.217386	0.342875	1.00207	0.290992	0.286923	0.403933	0.76432	0.10844	0.382029	0.392411	0.230883	0.554316	0.633575	0.527932	0.280191	0.811441	0.524092	0.345171	0.625456	0.975441	0.300207	0.781387	0.506839	0.851781	0.622289	0.803507
AL391834.2	2.69749	1.93416	2.40988	2.32945	1.98351	2.82467	2.765	3.89883	2.35171	3.05812	2.44728	3.21974	1.91242	2.63016	2.44135	2.14711	3.27467	2.55621	2.72791	1.59131	2.12336	2.02387	1.25032	3.17529	1.96018	3.44397	1.81145	1.70592	2.20918	2.12068	2.29999	1.56279	2.55184	2.0327	2.5732	2.69393	2.60566	3.52401	2.34524	2.4329	1.45038	2.25267	4.1768	1.20138	2.59092	1.07209	0.79536	2.4903	2.29678
AC078860.2	0	0.0455429	0.064851	0.18806	0.028151	0.0532092	0.0493911	0.179529	0.0435089	0	0.289772	0.132112	0.0808721	0.0275251	0.143172	0.0804044	0.154215	0.0389466	0.0291367	0.0969813	0.0814783	0.0892271	0.0479779	0.0450654	0.0812342	0.0488786	0.0268108	0.101967	0.0837375	0.0845054	0.134882	0.0351985	0.0406745	0.0382906	0.0612868	0.0328359	0.109443	0.0331914	0.26167	0.130376	0.035778	0.0576269	0.2831	0.124469	0.83307	0.120081	0.353158	2.62699	1.90367
AC053503.3	2.9887	7.17891	1.29687	0.221222	0.397381	0.62592	9.29612	6.65238	0	9.83951	11.2487	2.25342	0.95133	1.29515	1.23507	0.378331	1.8141	25.0147	2.87907	2.2056	1.91692	8.29195	0.677259	6.46749	0.382236	2.06992	0.315386	0.239895	0.197008	7.15731	1.79822	0.496865	0.287082	0.360342	0.937222	9.42478	1.2016	2.96737	2.37455	0.817957	1.26261	0.135577	0.095149	1.17134	0.217772	0	1.10782	0.331096	0.223937
AC015922.2	9.00343	7.19342	4.5306	7.42593	5.90002	7.51537	8.92642	9.95194	5.22019	10.3937	8.96677	10.0321	7.49221	8.61146	10.1472	7.04183	10.1882	13.4269	4.55784	6.23522	6.68216	9.82463	8.01521	7.59709	9.00622	8.61108	7.04429	8.15597	10.174	8.34217	9.21822	6.09411	10.3162	6.74576	7.72549	6.7323	9.41885	6.14989	9.48098	8.84431	7.55286	3.23823	8.04626	4.53684	1.26521	3.96656	2.68176	1.63862	2.31294
AC109460.2	0.408711	0.351665	0.532051	0.45379	0.31247	0.770364	0.834267	0.541504	0.524935	0.4893	1.11875	1.05199	0.526891	0.371941	1.12855	0.491507	0.967518	0.488687	0.253105	0.265218	1.04202	1.11959	0.370466	0.434972	1.68576	1.10868	0.582251	0.754542	0.619648	1.65169	0.781129	0.271789	1.21703	0.221749	0.428867	1.01418	0.33451	0.304346	1.53342	2.39095	0.310796	0.417161	1.7566	0.720826	2.09954	0.796827	0.113623	1.08668	1.83743
AC027097.1	0.893743	0.57074	0.506159	0.530614	0.352785	0.783798	0.575529	0.434179	0.79396	0.710526	0.660979	0.515564	0.684545	0.320736	0.765951	0.813168	0.576394	0.359635	0.326703	0.447765	0.698633	0.627754	0.812221	0.7431	1.06267	0.773737	0.383147	0.709911	0.466396	0.70601	0.434938	0.510753	0.706467	0.370414	0.38402	0.47647	0.569467	0.445142	0.616395	0.754827	0.519161	0.354753	0.68466	0.738869	0.529121	0.580816	0.181171	0.629134	0.690588
LINC01106	0.490719	0.268217	0.394249	0.410864	0.315536	0.464995	0.34718	0.699185	0.363693	0.373192	0.639962	0.602361	0.430191	0.339896	0.253862	0.717929	0.893576	0.0739901	0.160525	0.307072	0.727518	0.313598	0.282557	0.522248	0.717622	0.640725	0.519534	0.471373	0.991619	0.818764	0.708948	0.468087	0.502273	0.53103	0.617088	0.82343	0.443559	0.554898	0.284066	0.487118	0.278679	0.569289	1.40604	0.709392	0.896836	0.159689	0.357826	0.213888	0.524402
AP003068.1	0.410214	0.352958	0.628244	0.516186	0.599967	0.360825	0.669867	0.739153	1.05373	0.67526	0.94742	0.799895	0.940138	0.613293	1.24828	0.311567	0.896377	0.150918	0.310488	0.532387	0.710389	0.388975	0.697178	0.480228	0.472174	0.520862	0.545432	0.92195	1.13569	0.654917	0.784001	0.818366	0.827472	0.778974	0.712459	0.572576	0.600798	1.22186	0.760478	0.842015	1.10912	0.725738	0.587685	0.964635	1.61407	0.697969	1.02636	0.59078	1.38314
AC008649.2	0	0	0.141225	0.068256	0.0613039	0	0	0	0.0947487	0	0.315517	0.0719245	0	0.119882	0.415711	0	0	0	0.0634506	0	0	0	0	0	0	0	0	0.0740172	0.0607847	0.0920131	0	0	0	0	0.133463	0	0	0	0.16281	0.0946397	0.155826	0	0.0880718	0	1.00787	0.0653745	0.769067	0.102156	1.24368
AL136115.2	0.0760328	0	0.0291111	0.0844188	0	0.0477704	0.0443426	0.0402946	0.0781233	0	0.0325192	0.029652	0.0726058	0.0741349	0.257075	0.0481239	0.138452	0.0699314	0.0261585	0	0.07315	0.0801068	0.0430738	0.0404591	0	0.0438825	0.0481407	0.0305148	0.100238	0.0758677	0.08073	0.0316007	0.036517	0	0.110045	0.117918	0	0.0297988	0.0671209	0.0780334	0.0321209	0.0776048	0.217854	0.111746	0.166204	0.080855	0	0.168462	0.256364
LINC02163	0	0	0	0	0	0	0.0453469	0	0	0	0	0	0	0	0	0	0	0	0	0	0	0	0	0	0.0372913	0	0	0	0	0	0	0	0.037344	0	0	0	0	0	0	0	0	0.370358	3.30469	2.85693	1.52971	0	0.216161	1.76585	0
IER3-AS1	1.01627	1.09303	0.64851	0.84627	0.703774	1.06418	1.03721	0.673233	0.522107	0.380205	0.615767	0.627531	0.646977	0.825753	1.09765	0.777242	1.07951	0.584199	0.582734	0.581888	1.6703	1.02611	1.24742	0.495719	0.690491	0.488786	0.509405	0.611801	0.586163	0.507033	1.21394	0.422382	0.488094	0.68923	0.766085	0.853733	0.510735	0.497872	0.859772	0.347671	1.93201	2.47796	1.1324	1.74257	0.647943	0.510343	2.11895	0.375284	0.951837
AC068580.1	0.354216	0.190485	0.610294	0.131095	0.706455	0.556374	0.619741	0.375443	0.636922	0.132519	0.454494	0.621633	0.422814	0.748311	0.299411	0.672589	0.322506	0.244344	0.426529	0.202814	0.937162	0.746392	0.100335	0.0942439	0.424706	0.204436	0.616755	0.78188	0.525353	0.706895	0.658173	0.220829	1.19086	0.560532	0.576752	0.480681	0.381459	0.208237	0.781746	2.09034	0.224464	0.662823	0.507462	1.04119	1.35502	2.26009	0	0.981026	0.796219
AC084824.5	0.457913	0.393999	0.584413	0.384138	0.385603	0.460321	0.640936	1.00306	0.345036	0.822304	1.09675	0.547649	0.320667	0.535779	1.2042	0.695591	1.38973	0.954645	0.588155	0.326278	0.704882	0.546776	0.345887	1.52698	0.819898	1.05714	0.44456	0.563584	0.704304	1.15753	0.810337	0.507514	0.879704	0.276048	0.397651	0.757516	0.447105	0.526432	1.02408	1.19057	0.644836	0.602402	1.77855	0.538401	1.60156	0.454491	0	0.744023	0.411725
AC108010.1	0.544284	0.607074	0.740953	0.537169	0.804095	0.557279	0.940529	1.68797	1.01493	0.362002	1.87956	1.30504	0.750752	0.615871	1.54493	0.727271	1.10124	1.33495	0.929348	0.615587	2.7346	1.76282	0.525329	0.471986	1.81761	0.930768	0.740288	1.16502	1.32881	2.41379	1.90496	0.687023	1.6459	0.838519	0.773171	1.65698	0.781526	0.647848	1.93975	2.54476	0.596138	0.562395	1.21296	0.414784	0.660987	1.14332	0	1.4516	1.08752
AL022328.1	0.700282	0.251058	0.571991	0.622015	0.403477	0.469309	0.490088	0.445348	0.383752	0.41918	0.838628	0.619032	0.624136	0.515894	0.736625	0.384136	0.595084	0.429391	0.449729	0.534614	0.808476	0.836178	0.211584	0.645906	0.806054	0.862226	0.472947	0.637044	0.430834	1.02485	1.1401	0.310454	0.852037	0.464373	0.337846	1.01365	0.482649	0.475721	0.865481	1.86864	0.197228	0.317671	0.66883	0.411685	0.408208	0.463366	0	0.672352	0.839528
DGCR11	0.987774	0.910611	0.818136	0.805753	0.716985	0.658602	0.858232	0.886717	1.07707	0.57317	0.586286	0.597486	1.01063	0.701044	1.88572	0.74641	0.697452	0.509877	0.922412	0.992634	0.64971	0.690261	1.0164	0.761613	0.841126	0.372307	0.631798	0.825222	0.903589	0.442527	1.15582	1.13945	0.580907	0.464831	0.904464	0.820675	0.859678	0.861164	0.791915	0.879286	1.18376	1.30311	0.433199	0.799941	0.771152	1.30052	0.784583	0.748132	0.702356
AC093297.2	1.67567	0.829597	1.95527	2.48721	1.23777	1.41487	2.68875	1.82307	1.37557	1.65846	2.35102	2.41343	1.7356	1.83843	2.23826	2.09873	2.92216	1.86738	1.56784	1.05589	2.0898	2.05503	0.652953	3.23642	2.05803	2.54827	1.79072	2.02108	2.03379	3.02558	1.86391	1.31181	2.12907	1.6355	2.07237	1.83564	2.14635	1.89026	2.48109	2.06553	1.36337	2.23215	4.99599	1.35516	3.31407	2.14336	0.640838	3.92878	2.29186
AC036214.2	0.632723	0.785206	0.857207	1.13482	0.598599	0.489269	0.823168	0.619051	0.775141	0.582677	1.18654	1.08193	0.813351	0.743477	0.959942	0.785543	1.86118	0.335739	0.468856	0.705978	0.772622	0.640985	1.51651	0.880569	0.770307	0.617991	1.23265	0.644604	1.18706	0.849892	0.801005	0.606858	0.677894	0.858218	0.986202	0.660478	0.817662	0.78208	1.03119	0.874153	0.925272	0.794836	0.74376	0.572259	0.744746	0.690104	0.135307	0.700947	1.03934
FOXD2-AS1	4.58053	1.72188	5.59164	6.53081	4.0681	6.29223	5.44651	3.20526	3.83828	2.16952	6.48972	5.0573	4.39106	3.76374	4.19008	4.49796	5.16652	0.621718	0.905758	3.25246	7.72698	3.33601	2.69068	3.59697	7.44789	6.18052	5.74407	8.02442	7.41064	7.49043	4.13634	3.58572	5.93768	7.56014	6.27554	4.89685	5.27189	5.41001	7.88314	5.37654	2.014	4.48459	4.03502	3.32028	4.80226	0.73775	1.33522	1.6652	1.81934
LINC02595	0.0595084	0	0	0	0.0395615	0	0	0.126149	0.122289	0.0890525	0.101807	0.0464153	0	0.0386819	0.268272	0.037665	0	0	0.12284	0	0.0572521	0	0.0674249	0	0	0.0686907	0.0753562	0.0955316	0	0.118758	0	0.0494657	0.0571612	0	0.0430642	0.0922907	0.0512681	0	0	0.0610741	0.05028	0.16197	0.852535	1.04952	0.910576	0.25313	0.165435	0.329625	0.401294
AC008770.3	0.572196	0.205138	0.401646	0.564716	0.253599	0.719006	1.00112	0.555944	0.783904	0.428137	0.693395	0.520684	0.637473	0.526917	0.698625	0.241442	0.6078	0.263139	0.328099	0.29122	0.642251	0.452141	0.378184	0.405974	0.823277	1.21089	0.603816	0.68893	0.660059	1.09433	0.556916	0.435995	0.687034	0.689885	0.621118	0.369755	0.534043	0.336383	1.17863	1.02769	0.120865	0.584026	0.774204	0.140161	0	0.270438	0.13256	0.739543	0.96465
LINC01637	6.13354	2.59661	7.1201	4.37098	4.2945	6.19039	4.10986	2.66268	5.53116	2.29467	5.41406	5.87825	6.3244	4.24144	4.0079	4.25383	4.75272	0.930221	3.52448	3.36244	6.96818	3.43733	3.43778	3.4027	5.63295	8.88761	4.89567	6.0231	6.19364	3.7112	4.15688	3.52551	7.77192	7.58193	5.40663	2.65639	4.69395	6.31652	7.22909	8.03607	2.78414	2.93038	3.95731	3.35648	2.06819	1.0177	4.26285	4.55403	1.54005
AL021878.2	0.671147	0.421072	0.385449	0.124195	0.632091	0.421673	0.782831	0.474244	0.3448	0.251088	1.19604	1.09058	0.640896	0.436262	1.13461	0.530991	0.814752	0.565848	0.50029	0.256186	1.18378	0.530331	0.570323	0.595225	1.55577	0.387353	0.566588	0.85296	0.47927	0.781304	0.950145	0.604374	0.698399	0.202297	0.566634	0.390327	0.626396	0.482233	0.987468	1.72202	0.330789	0.228341	0.53417	0	0.733547	0.356856	0.155484	1.17723	0.754313
AL121992.3	0.515969	0.277469	1.43225	0.477397	0.771792	0.891485	0.752287	0.478527	0.331347	0.193033	1.21374	0.603667	0.677479	0.586937	0.872271	1.02055	1.29189	0.118641	0.843196	0.295428	0.558456	0.271807	0.146152	0.960961	0.804242	0.818928	1.34759	1.13892	1.06285	0.772272	1.30113	0.64334	0.867331	0.46657	0.886798	1.35035	0.944607	0.252773	0.683237	0.463352	0.65393	0.48275	4.98955	2.0854	3.24266	0.228622	0.358602	0.357252	0.869858
AL365330.1	0.882539	0.632798	0.675806	0.55993	0.5029	0.95055	1.61763	0.579073	0.993166	0.880463	0.970615	1.4095	0.802629	0.491719	0.899923	0.558591	0.918322	1.8167	0.867517	0.705839	1.05124	1.23977	0.190466	1.0287	1.41089	1.21276	0.931309	0.944521	0.914174	2.22252	0.580085	0.524001	1.61472	0.646036	0.547426	1.23836	0.868951	0.724711	0.890395	2.71728	0.639152	0.71491	2.08719	2.10003	2.11292	1.13217	0.46733	1.39671	1.51147
AC009318.3	0.133095	0.143148	0.509589	0.229872	0.265447	0.445984	0.517478	0.799402	0.273509	0.464737	0.910796	0.830492	0.381289	0.403738	0.400008	0.308883	1.29259	0.734488	0.366323	0.338695	0.341464	0.747876	0.251335	0.802666	0.425551	0.358475	0.22472	0.427328	0.467909	0.752569	0.376847	0.36878	0.511383	0.320941	0.35316	0.584844	0.267552	0.173876	0.665805	0.546389	0.22491	0.452823	0.847451	0.130408	0.581879	0.471788	0	0.884679	0.299176
AP006621.3	1.74901	1.40516	1.08112	0.935861	0.71446	1.5093	1.47474	0.625384	1.06093	1.3875	1.8566	1.51211	0.865271	0.698576	1.21121	1.08033	1.15115	2.38391	2.16044	0.7561	1.50023	1.5541	1.43254	1.52499	1.67765	1.727	0.773842	1.4208	1.09734	1.17749	0.626477	0.560518	1.51809	0.800306	1.25045	1.01311	0.853258	1.07363	1.41379	1.79503	0.854617	0.716935	2.97864	2.66345	4.92875	0.672265	2.63618	2.63793	1.61048
AC010761.3	0.178883	0.240492	0.376694	0.264817	0.297306	0.11239	0.0521626	0.521407	0.551403	0.20077	0.535556	0.418574	0.25623	0.203487	0.85683	0.198137	0.488606	0.370188	0.676976	0.170705	0.774452	0.424052	0.15201	0.333159	0.90082	0.258106	0.283152	0.215377	0.383224	0.937096	1.37702	0.223042	0.515482	0.323513	0.22654	0.520176	0.192641	0.315485	0.631663	1.28513	0.34007	0.0608604	0.597971	0.39436	0.684301	0.317047	0	0.445885	0.804197
AL139089.1	0.228878	0.393864	0.262896	0.440478	0.228239	0.431404	0.480538	0.242594	0.658479	0.205506	0.567768	0.535561	0.480837	0.267798	0.180568	0.362163	0.625165	0.273665	0.283478	0.244625	0.462421	0.434056	0.544586	0.219226	0.482989	0.871843	0.202882	0.569515	0.301741	0.433924	0.340225	0.418556	0.615583	0.144876	0.447205	0.230727	0.295777	0.143523	0.464718	0.634231	0.290077	0.295907	4.17524	5.65128	5.95377	0.292073	0.445402	0.481759	1.23475
AC102953.2	0.648968	0.364855	0.739775	0.600454	0.441242	0.463338	0.997812	1.1334	0.621346	0.331078	0.946237	1.10439	0.753519	0.527306	0.573491	0.630135	0.510297	0.617238	0.461768	0.58552	1.4261	0.808057	0.292449	0.76915	0.877147	0.459678	0.723741	0.994463	0.870149	1.09643	0.548115	0.521057	0.793381	0.720207	0.597718	0.491801	0.768767	1.19079	0.592432	1.56672	0.442401	0.792855	1.42277	1.56076	0.419135	0.470541	0.348529	0.580057	1.724
CFTR-AS1	0	0	0	0	0	0	0.117779	0.32108	0.103752	0	0	0	0	0	0.113803	0.0639112	0.183872	0	0	0	0	0	0	0	0.0968561	0	0	0	0	0.302269	0	0	0	0	0	0	0	0	0.0891402	0	0	0.0687089	0.289322	0	0.220728	0	0	0.111864	0
AL365203.2	0.423097	0.268364	0.797506	0.610289	0.591403	0.667973	1.55643	0.850907	0.635374	0.957845	1.11359	0.736168	0.88057	0.571202	1.02705	0.37079	0.928478	1.89583	0.933097	0.745393	1.40904	0.594356	0.417923	1.43166	0.593144	0.463336	0.659413	0.923038	0.593545	1.33148	0.414678	0.721425	0.739873	0.647459	0.486749	1.17775	0.766404	1.12247	0.900243	0.623509	1.24661	0.37648	0.714936	0.860996	0.877439	1.89971	0.482552	0.624957	0.53649
HM13-IT1	0.376106	0.471932	0.480006	0.324791	0.166692	0.393838	0.65804	0.597967	0.515262	0.469027	0.536201	0.537817	0.419013	0.407464	0.777122	0.198376	0.456581	0.403579	0.388189	0.38284	1.02523	1.12273	0.497164	0.200136	1.14241	0.506497	0.158756	0.704411	0.413199	0.688031	0.332784	0.416846	0.842967	0.340098	0.226813	0.631906	0.216017	0.343942	1.16208	1.47968	0.370744	0.938379	1.97568	1.10554	1.23322	1.02212	0	0.555547	4.08621
AC108058.1	0	0.128791	0.523978	0.101298	0.210393	0.096731	0.219487	0.217581	0.0966734	0.115198	0.402408	0.466999	0.171524	0.194596	1.01219	0.173239	0.654159	0.118004	0.158906	0.104478	0.979254	0.144186	0.0387648	0.136544	0.246131	0.118478	0.108312	0.315814	0.169144	0.315786	0.935419	0.135087	0.172535	0.177892	0.111416	0.577038	0.0810582	0.221247	0.241625	0.482811	0.252942	0.401588	0.612688	0.377128	0.747886	0.139469	0.0237785	0.502207	0.59602
UBR5-AS1	1.91412	1.51854	1.75599	1.84468	1.14653	2.33379	2.08896	1.46638	2.24911	2.3823	1.90482	2.35033	1.60163	1.65692	1.64466	1.84726	2.62277	1.02842	1.04975	0.947671	1.53158	1.42765	2.80221	2.87414	2.05417	2.47199	1.61392	2.0232	2.29237	1.23864	1.46894	0.842807	2.73973	1.85939	1.84463	1.42551	1.91031	1.52265	2.451	1.97421	1.48118	1.59907	2.76033	3.42599	5.30272	0.974094	0.711264	1.88957	1.91701
AC018690.1	0.071296	0.306723	0.464057	0.316638	0.213291	0.537532	0.291061	0.415626	0.659306	0.373423	0.823317	0.695117	0.544659	0.301237	1.20529	0.383569	0.454393	0.229511	0.637749	0.272147	0.823113	0.450697	0.242342	0.531138	0.37613	0.699526	0.29342	0.429205	0.493463	0.782553	0.719154	0.533376	0.787565	0.25788	0.74812	0.746361	0.675658	0.419135	0.975559	1.06099	0.602396	0.776214	0.953314	1.25741	0.467548	0.303271	0.396409	1.22425	1.44235
EIF1AX-AS1	0	0	0.045207	0.0436983	0.0392475	0	0.0688601	0.125148	0	0	0.0504994	0	0	0.0767498	0.0665357	0	0	0	0.0406218	0	0	0	0	0.125659	0	0	0.0373791	0.0947734	0	0.0589079	0.0626832	0	0.0567076	0	0.0427224	0.0457791	0	0	0.0521164	0.121179	0	0.0401711	0.112769	0.173532	0	0	0	0.0654017	0.265406
AC097641.2	0.384752	0.310359	0.478765	0.391589	0.447624	0.181301	0.61707	0.305856	0.741245	0.143943	0.781652	0.450148	0.137779	0.187574	0.325222	0.273964	0.175154	0.0884693	0.132371	0.220298	0.508976	0.557381	0.217968	0.255921	0.691979	0.388606	0.243609	0.308831	0.348726	0.719844	0.408521	0.399776	0.277183	0.304427	0.278432	0.223765	0.29004	0.301584	1.06142	1.5795	0.121907	0.359982	0.505274	0.282738	0.94618	0.375058	0	0.372959	0.972966
GASAL1	0.512731	0.466618	0.712765	0.344489	0.52441	0.693845	0.423238	0.342796	0.364727	0.306915	0.364367	0.42453	0.542349	0.297395	0.444512	0.264614	0.344736	0.166869	1.89428	0.548006	0.819622	0.59838	0.214501	0.512095	0.877697	0.573636	0.624306	0.607836	0.504369	0.550973	0.661663	0.406531	0.492508	0.499307	0.342504	0.50158	0.672792	0.723419	0.313361	0.493839	0.359904	0.627998	0.964338	0.626041	1.10356	0.430607	0.482445	0.235946	0.354626
AC040169.1	1.5848	0.875281	1.50875	0.729199	0.683404	0.914973	0.899279	0.499389	1.05624	0.576876	0.769413	0.534533	1.02254	0.835262	0.675829	0.379541	0.233987	0.827298	0.648389	0.588589	1.23625	1.4892	1.84415	0.547013	0.821697	0.791063	0.569511	0.893889	0.818785	0.812047	0.545741	0.64087	0.905144	1.04575	0.557933	0.597853	0.590419	1.37652	1.55029	1.14294	0.7238	1.13666	0.695446	1.63673	1.87259	0.880611	2.3815	1.18627	1.82932
AP001372.2	2.28259	1.74256	1.63137	1.94134	1.11282	2.12587	1.48261	1.29033	1.444	1.98252	1.66156	2.02473	1.29927	1.5652	1.30141	1.26343	1.89079	1.39961	2.57457	1.03872	1.55015	1.53724	3.06292	2.11487	1.84602	2.40748	1.73995	2.13394	2.14777	1.35765	1.39713	0.863119	1.77124	1.51364	1.5741	1.77696	1.98193	1.52256	1.69105	2.07623	1.04372	1.541	2.66738	2.05232	2.622	1.09152	0.746547	2.55846	1.16702
AC124045.1	0.2171	0.294945	0.516234	0.279105	0.26587	0.244087	0.573094	0.544998	0.46962	0.495876	0.518026	0.365404	0.41463	0.363943	0.373458	0.376071	0.582591	0.367829	0.330216	0.21808	0.285821	0.517659	0.245982	0.668828	0.317845	0.23741	0.383437	0.440238	0.331406	0.661288	0.376099	0.303936	0.373172	0.278974	0.264603	0.425303	0.354388	0.394083	0.403482	0.469079	0.415138	0.590904	0.62205	0.134348	0.67439	0.372631	0.127062	0.670895	0.693481
AC084125.4	0.0660226	0.213028	0.758353	0.195479	0.351137	0.248887	0.462056	0.209937	0.61054	0.395204	0.508281	0.463466	0.630467	0.257498	0.520868	0.543245	0.480896	0.54652	0.408862	0.453631	0.635193	0.278241	0.299223	0.210794	0.569961	0.15242	0.418026	0.476951	0.261122	0.461155	0	0.329283	0.570767	0.35821	0.238892	0.409574	0.227521	0.621014	0.29142	0.677598	0.502056	0.494176	0.441401	0	0.72161	0.14042	0.917723	0.219425	1.48408
AC037198.1	0.547997	0.523899	0.559505	0.338021	0.728622	0.650343	0.816739	0.387223	0.406657	0.182236	1.43231	0.783614	0.0872161	0.158316	1.13229	0.366116	0.554376	0.140006	0.0418964	0.278904	1.25947	0.256604	0.310449	0.550806	0.613246	0.667696	0.308416	0.708667	0.561906	1.73155	0.484875	0.0506129	0.263191	0.523061	0.374535	3.23427	0.1836	0.548859	1.34379	0.937359	0.308677	0.455747	0.116308	0.805398	0.931694	1.66192	0	0.472177	1.16337
DHRS4-AS1	11.8193	10.2805	4.61805	7.55789	2.34941	12.3466	7.42551	5.16111	6.20932	8.42071	6.11499	6.94679	3.59414	5.94278	2.54095	5.6922	6.11855	5.17549	3.31631	3.35701	6.74023	5.63409	11.6042	6.15384	8.28089	12.0299	5.97732	6.37121	6.73879	4.90213	4.02927	4.51221	7.57072	6.24526	6.76885	7.35911	6.63503	4.84398	7.92825	6.93522	6.39695	8.44391	6.08022	4.45456	5.82438	3.81316	4.35112	5.82784	5.50063
AC016773.2	0.306075	0.269339	0.362219	0.144172	0.388462	0.314677	0.421919	0.0884772	0.77193	0.249836	0.618838	0.412355	0.478275	0.162782	0.188158	0.264172	0.354676	0.0767763	0.210605	0.127454	0.64248	0.439738	0.252213	0.325741	0.613865	0.289066	0.281881	0.491356	0.348489	0.471998	0.443159	0.30068	0.42764	0.150966	0.221496	0.323651	0.191776	0.0872414	0.319327	0.542585	0.25861	0.208269	0.797259	0.899684	1.21648	0.355077	0.696188	0.554855	1.25092
THUMPD3-AS1	1.15579	1.10539	0.983084	0.755482	0.744733	1.19315	0.974796	1.03281	1.04871	1.14952	1.81914	1.4091	0.848996	0.929291	1.6914	1.23574	1.73552	0.817724	0.868692	0.575572	1.50886	1.23645	1.57549	1.25276	2.16269	1.77747	0.929944	1.43012	1.29869	1.51523	1.78226	0.650346	1.37665	0.832892	0.792655	1.34024	0.808851	0.696888	1.46926	2.3505	0.8173	0.612227	5.9168	2.57154	4.6643	0.708462	0.662399	1.95411	1.38295
AC055822.1	0.501475	0.21574	0.422406	0.482547	0.433398	0.693154	0.23397	0.584678	1.08205	0.450266	0.171584	0.58671	1.00563	0.554151	0.113036	0.698283	0.547898	0.184493	0.48308	0.689112	0.192985	0.528345	0.340912	0.960652	0.384813	0.636739	0.222258	0.362269	0.198336	0.70054	0.319473	0.208423	0.578035	0.136039	0.47177	0.233319	0.475238	0.275153	0.486966	0.51467	0.635561	0.204737	0.766324	0.29481	0.657719	0.675488	1.2547	0.388883	0.225446
AL139011.1	0.60096	0.4309	0.429507	0.266897	0.292982	0.45309	0.467309	0.382183	0.329324	0.359727	0.479789	0.406238	0.306065	0.494809	0.361228	0.329653	0.510683	0.626432	0.441078	0.275274	0.732354	0.59095	0.136181	0.383744	0.922307	0.739935	0.355135	0.321583	0.343319	0.479724	0.297773	0.199817	0.808159	0.217369	0.434894	0.46601	0.310646	0.282634	0.565888	0.65789	0.270808	0.381662	0.49744	0.706591	0.700623	0.568066	0	0.621375	0.810514
AC132872.1	1.69935	1.34567	0.886586	1.06434	0.918687	1.24367	2.65737	1.97932	1.7077	3.38139	2.30024	2.25765	1.64059	1.00751	1.93627	1.41835	1.93827	2.8168	1.79892	1.04072	1.81458	2.85284	0.465486	3.31896	1.91662	1.48734	0.922247	1.51391	1.37867	1.71429	1.84399	0.667476	1.59645	1.04695	1.4595	2.53413	1.57665	1.40521	2.80251	2.2807	1.56204	0.838652	4.31618	2.74457	5.71491	1.46953	0.415318	1.75846	2.98032
FENDRR	5.55674	11.1793	2.37902	3.49806	2.29902	3.18585	9.67617	13.1858	3.44866	13.8346	6.2337	4.81571	3.35563	4.51716	3.56067	2.38212	4.64665	23.038	2.51511	4.93415	4.78681	13.4909	3.0103	14.4	3.15329	4.54147	2.46197	2.85487	3.78842	7.78942	3.12436	2.44053	3.88961	2.40546	3.20367	9.42262	3.68666	4.91163	4.43866	5.30186	5.74945	2.47603	2.18937	1.66039	2.07471	0.197903	0.374328	1.45894	1.18853
AL132989.1	0.736106	0.833372	0.534007	0.630894	0.515123	1.21707	0.994168	0.533833	0.517499	0.927631	2.94948	1.35982	0.77692	0.528854	1.83389	0.613037	0.917126	1.2828	0.639793	0.532387	1.52821	1.71437	0.790135	0.700939	1.52363	1.02857	0.662311	1.33719	0.89383	1.8556	1.6043	0.515267	1.07922	0.805764	0.532695	1.29183	0.600798	0.516254	2.05208	3.06166	0.52375	0.421797	1.11007	1.02492	1.86316	1.29092	0.107705	1.75972	0.783778
Z68871.1	0.236353	0.360123	0.105576	0.145789	0.117846	0.0494991	0.160816	0.354898	0.161901	0.294746	0.269568	0.168988	0.206891	0.140832	0.155387	0.112197	0.0717312	0.217386	0.149078	0.0601461	0.625326	0.539537	0.133898	0.0419231	0.396743	0.386499	0.224472	0.173904	0.298612	0.294799	0.271867	0.0491164	0.264869	0.106862	0.0997736	0.29019	0.203624	0.138947	0.452074	0.323429	0.29955	0.294848	0.790081	0.636846	0.473601	0.335124	0	0.283658	0.531281
OCIAD1-AS1	0.42105	0.452851	0.83829	0.249327	0.0559832	0.423264	0.687562	0.357025	0.259576	0.378053	1.0805	0.459774	0	0.273693	0.75926	0.159898	0.920055	0.232357	0.115887	0.257153	0.162034	0.532332	0.286238	0.627344	0	0.388815	0.213272	0.135186	0.166527	0.58819	0.447061	0.209996	0.323554	0.304591	0.12188	0.1959	0.0725492	0.0660071	0.817735	0	0.142302	0.687608	0.723851	0.247529	0.920394	0.119401	0.234106	0.37316	0.567869
DANCR	25.2064	16.2808	17.4023	15.1083	7.51192	19.8927	11.6761	9.60608	16.3866	14.2494	17.0838	15.41	12.1983	12.2521	17.787	11.0522	12.2174	7.56321	7.9228	5.8453	16.33	10.6187	30.5736	11.6824	16.9274	17.0787	12.6082	15.4742	15.1605	12.6587	7.8808	9.9689	14.8407	14.4477	12.9829	19.993	12.3935	13.7103	15.3203	16.6083	17.1386	22.9	27.9732	25.8362	18.4022	10.4963	50.2549	16.337	28.9775
AC108727.1	0.113566	0.0610715	0	0.0420304	0	0.0713518	0.0662319	0.240742	0.116688	0.0849738	0.437147	0.132868	0.0542234	0.0738204	0.319981	0.0359399	0.413595	0.104452	0.156285	0	0	0.119651	0	0.0604312	0.108932	0	0.0719048	0.045578	0.0374298	0.283297	0	0.1416	0.0545432	0.0513464	0.0821835	0.176127	0.0978399	0	0.100254	0.116554	0.0479771	0	0.542325	0.166909	0.248249	0.402561	0	0.251622	0.127638
BX322234.2	0	0	0	0	0	0	0	0	0	0	0	0	0	0	0	0	0	0	0	0	0	0	0	0	0	0	0	0	0	0	0	0	0	0	0	0	0	0	0	0	0	0	0	0	0	0.0848291	0	0	0.67241
AL049552.1	0.348077	0.45756	0.740391	0.3149	0.437096	0.777573	0.496223	0.450922	0.715295	0.636641	0.496242	0.482654	0.480117	0.351959	0.741002	0.195832	0.774685	0.675862	0.159671	0.177155	0.781387	0.448223	0.438203	0.411602	1.00163	0.580359	0.416288	0.651916	0.713825	1.11915	0.328516	0.514374	0.520098	0.244808	0.307868	0.779753	0.133279	0.424413	0.955979	0.635086	0.424809	0.1579	1.51447	0.454732	0.845422	0.301606	0.322555	0.471301	1.2171
LINC01473	0.215461	0.0827625	0.129635	0.250617	0.225091	0.174049	0.125658	0.212061	0.142319	0.230308	0.368611	0.216071	0.293928	0.130051	0.329558	0.155855	0.588518	0.0849305	0.254152	0.176238	0.192486	0.113503	0.20925	0.0655157	0.147622	0.248708	0.0682104	0.259418	0.101447	0.23035	0.326817	0.153514	0.19218	0.222666	0.0668237	0.34609	0.119331	0.132697	0.176621	0.221131	0.104027	0.157083	1.49929	0.723809	1.31204	0.098197	0.0427849	0.323942	0.761075
CASC19	0	0.0653981	0.23281	0.045008	0.0404238	0.0764067	0.141848	0.451145	0.0624773	0.181987	0.156039	0.0948541	0	0.0395251	0.13706	0	0	0	0.0418393	0.0464206	0.117	0.192191	0.0688946	0	0.174974	0.210564	0	0.146421	0.120244	0.303368	0.129124	0.0505439	0	0	0.0880058	1.08448	0	0.142985	0.161035	0.249622	0.154128	1.61363	8.18852	4.64707	3.32295	0.991484	0.169041	0.404172	1.36681
AC063965.2	0.134162	0.0480984	0.13698	0.198612	0	0.337169	0.104325	0.0948012	0.137851	0.0669232	0.459049	0.139525	0.213525	0.232557	0.352812	0.084916	0.244303	0.123396	0.246173	0.136564	0.1721	0.188468	0.20268	0.190376	0.128689	0.0516213	0.226522	0.143585	0.294787	0.669354	0.379868	0.148694	0.0859137	0.0404392	0.355991	0.242749	0	0.0350539	0.552705	0.367179	0	0.0912906	0.38441	0	0.195515	0.0634094	0	0.3468	0.201049
AL133410.1	0.234408	0.100845	0.305147	0.329665	0.155836	0.500736	0.437464	0.223609	0.168597	0.245549	0.641639	0.420516	0.268611	0.167608	0.317023	0.311567	0.725638	0.237157	0.161293	0.196849	0.405937	0.271665	0.212473	0.449044	0.494658	0.541156	0.415567	0.338676	0.339934	0.537968	0.472889	0.292274	0.54039	0.254359	0.271413	0.345363	0.282728	0.220486	0.993277	0.745785	0.297085	0.127602	0.917908	0.964635	1.69093	0.0997099	0.521328	0.519367	1.31727
AC062037.3	0.305694	0.328782	0.468171	0.452546	0	0	0	0.324012	0.628197	1.37238	0.52298	0.476869	0	0	0.344527	0.386969	0.556654	0.843488	0.420686	0	1.47052	0.644146	0	0.976005	0.293222	2.11718	0	0.245372	0	1.22012	0	0.508209	0.587273	0	0.22122	0	0	0	0.269863	0.313737	0	0.416019	1.45982	0	2.67292	0	0	0.338656	0
AC138956.1	0.177108	0.0476213	0.237337	0.294963	0.323792	0.278187	0.258225	0.187722	0.272967	0.265037	0.454494	0.621633	0.126844	0.172687	0.299411	0.224196	0.241879	0.325792	0.0913991	0.0676047	0.425983	0.419845	0.0501673	0.23561	0.509648	0.5622	0.0841029	0.31986	0.350236	0.883618	0.423111	0.184024	0.510368	0.240228	0.192251	0.446347	0.343313	0.104118	0.664484	0.863399	0.112232	0.241027	0.634327	0.130149	0.677512	0.188341	0.369274	0.39241	0.895746
AC108134.1	0.47387	0.368524	1.03836	0.696117	0.916014	0.732865	0.80783	0.687719	1.27343	0.42548	1.24099	1.49549	1.51069	0.796132	1.7501	0.646002	1.04875	0.0871687	0.627043	0.94059	2.44785	0.591432	0.223024	0.636216	1.21676	1.2707	1.01088	1.18205	1.53298	1.3385	1.88873	1.4241	1.0084	0.758119	0.95491	1.27763	0.584114	0.891452	1.35152	3.3071	0.455821	0.57544	1.26028	1.0929	1.40239	0.294602	0.628285	0.613806	1.5568
VPS9D1-AS1	0.814718	1.01317	1.52069	1.30033	0.533166	0.991761	1.29181	1.33579	1.1772	0.647701	1.90561	1.0922	1.61677	0.901953	2.0086	1.13607	0.927227	0.163918	0.49928	0.3693	1.80035	1.52897	1.73082	0.731586	1.53854	2.16005	1.23319	1.84946	0.948213	1.85454	0.892082	0.931185	1.4918	1.47343	1.32656	2.46784	1.00898	0.937957	1.76435	1.59392	2.0221	3.78534	2.39517	8.30697	7.45766	3.9529	8.49352	8.36284	9.47151
PSPC1-AS2	0.17805	0.255331	0.409027	0.395376	0.394563	0.6712	0.484585	0.251627	0.487855	0.266447	0.659984	0.416626	0.283375	0.308632	0.668896	0.375648	1.18881	0.655049	0.204189	0.135929	0.171299	0.500242	0	0.505308	0.797002	0.34254	0.112734	0.428749	0.430343	0.651433	0.252066	0.394673	0.171028	0.26834	0.386547	0.414204	0.0511317	0.279126	0.366755	0.487294	0.40117	0.0403848	2.15401	3.14019	3.24341	0.462838	0.164995	0.525997	2.26795
AL034550.1	0.294222	0.194735	0.329286	0.485822	0.225693	0.227515	0.131994	0.359831	0.255802	0.237082	0.735672	0.441322	0.389023	0.308945	0.331599	0.200549	0.288489	0.124898	0.373754	0.155504	0.762103	0.429213	0	0.0240867	0.607856	0.313497	0.343918	0.526829	0.492319	0.654917	0.69689	0.338634	0.521756	0.368382	0.343946	0.315904	0.194985	0.230623	1.33864	0.905892	0.152982	0.246405	0.951104	0.665265	1.13789	0.320905	0	0.150437	1.42447
SPINT1-AS1	22.4417	8.31031	15.8056	15.5981	17.2423	24.669	13.3402	7.04433	15.4157	7.46597	12.6796	16.7174	14.6021	15.0911	14.8386	17.9661	15.3163	1.54061	20.5601	15.4139	17.3974	6.48982	23.2436	8.83656	11.5059	19.1893	16.0679	20.9048	17.5711	8.53665	14.0942	11.8873	17.5774	23.5179	16.7877	8.22628	15.4859	20.0331	14.1032	17.3388	8.96335	10.6746	5.41866	11.0119	5.98442	1.71103	24.9354	8.53992	10.4048
AC232271.1	0.205485	0.318247	0.339876	0.237274	0.207643	0.278863	0.421835	0.453021	0.312479	0.369002	0.752301	0.60904	0.337503	0.235084	0.296433	0.291331	0.88306	0.461148	0.186636	0.144323	0.466557	0.42433	0.149005	0.428627	0.717449	0.379507	0.270616	0.442031	0.265482	0.902169	0.471267	0.218633	0.497397	0.282434	0.321197	0.452531	0.240762	0.180395	0.696574	1.09664	0.270845	0.201344	1.93116	1.20801	0.70072	0.42538	0	0.427966	0.332564
RUSC1-AS1	0.380813	0.423228	0.782481	0.56845	0.620258	0.630051	1.07344	0.672722	0.821694	0.379917	1.62873	0.91088	0.800027	0.474448	1.11589	0.494112	0.993935	0.630457	0.541532	0.373095	1.38001	1.33739	0.273266	0.53362	1.04104	0.578772	0.578674	0.72851	0.661025	1.27295	0.768243	0.543405	1.20102	0.556705	0.569535	1.56016	0.355421	0.38307	1.97224	2.35802	0.455823	1.1747	3.14003	1.9589	4.6339	0.904422	0.105867	1.04062	4.28002
AC135050.5	0.698648	0.530411	0.881161	0.699655	0.792322	0.826261	0.814908	0.696955	0.633403	0.369002	2.03895	1.21808	0.745647	0.747993	1.01899	0.59827	1.72122	0.37799	0.706954	0.34512	0.909391	0.736083	0.55877	0.481112	1.93159	0.948766	0.65052	1.15456	0.975242	0.943177	1.17817	0.478259	0.78952	0.668922	0.505588	1.24287	0.743529	0.612055	1.85028	2.44634	0.416685	0.335573	0.902777	0.84561	1.79672	0.611848	0	0.910566	1.20093
LINC00513	1.36711	0.846574	1.02572	0.13288	0.504923	2.51608	0.177178	0.775745	0.326344	0.12399	0.295309	0.441606	0.197801	0.116692	0.373522	0.0699226	0.125729	0.012701	0.104521	0.231931	0.969849	0.858397	0.297279	0.470286	2.5167	2.75762	0.201098	0.554213	0.209361	1.7224	0.131961	0.126266	0.305084	0.124871	0.229844	1.35995	0.154661	0.736045	0.719245	1.89912	0.816738	1.3249	1.26614	0.487093	1.69043	0.11748	3.07119	0.826102	0.403529
AL031600.1	0.156601	0.336858	0.149897	0.144894	0.130136	0.147586	0.136995	0.165985	0.563173	0.292936	0.401869	0.580191	0.149542	0.0254486	0.220618	0.0991184	0.0712908	0.108026	0.269387	0.149442	0.828649	0.247488	0.088717	0.0833314	0.525742	0.271147	0.123941	0.188549	0.335489	0.390652	0.37412	0.0650864	0.376061	0.318618	0.141658	0.455382	0.134916	0.0613751	0.483859	0.803607	0.231552	0.0266398	0.897406	0.690475	1.19813	0.721643	0	0.607204	1.40805
AGAP1-IT1	1.57957	1.15668	0.92647	1.09456	2.01084	2.78723	0.862411	0.498706	1.65753	1.15674	0.517467	0.91747	0.898606	1.20153	0.795422	0.787051	0.856778	0.154555	2.10438	2.18086	0.646673	1.41635	0.571182	0.608043	1.32171	3.33626	1.06395	0.917189	0.974752	0.704233	0.820734	1.45268	0.83934	2.30966	0.705306	0.443037	0.781761	0.474178	1.57244	1.7591	0.65311	1.12056	0.0962954	0	0.661186	0.428873	2.14891	0.670171	0.982083
AC092168.2	0	0	0.0714989	0.115188	0.0413823	0.0391091	0.0363028	0.131955	0	0	0.0266231	0.0485515	0.0297208	0.0606934	0.0350774	0.0393985	0.113349	0	0.128494	0.0237606	0.0598871	0	0	0.0331234	0	0	0.0197061	0	0.0410318	0.0931681	0.0660927	0.0258712	0	0.0281438	0	0.0482692	0	0.0731878	0.0549512	0.0638851	0.0262971	0.0211781	0.20808	0	0.204104	0.0882602	0	0	0.209882
AC091563.1	5.69761	5.17045	2.38599	3.22891	1.8939	2.75938	5.57273	7.58025	2.40878	7.23848	4.46758	3.63391	2.80541	3.81933	3.57859	2.32902	4.16084	12.9645	2.61362	2.53733	2.74079	5.65898	2.15186	9.72717	3.01722	5.37788	2.76198	2.59631	3.56011	4.29354	1.44938	2.36804	3.56307	2.9249	3.1568	3.93494	3.78375	4.04733	4.61064	3.19786	2.7079	3.51348	1.21872	2.44237	3.50288	3.45024	0.742477	4.99697	6.80386
AL133371.2	0.531325	0.408182	0.464986	0.842752	0.45415	0.476892	0.619741	0.884973	0.935885	0.45435	0.649278	0.94725	0.797306	1.03612	0.855459	1.96972	1.6586	0.628312	0.313368	0.347681	0.511179	1.19956	1.46202	0.646244	0.436841	0.788541	1.58594	1.76685	1.20081	0.681648	1.28948	0.567846	0.729097	1.30409	1.59293	0.765166	0.784716	0.713955	0.469047	1.40221	0.705459	0.516486	0.289978	0.223113	0.331843	0.860987	0.422028	1.09314	0
ZNF32-AS2	0.345214	0.212165	0.245466	0.273778	0.0983573	0.433787	0.517706	0.705667	0.177353	0.295202	0.527314	0.442355	0.235467	0.224398	0.416859	0.218499	0.493915	0.725741	0.322371	0.112948	0.379572	0.571547	0.195569	0.288668	0.614956	0.455408	0.171737	0.336472	0.308827	0.910371	0.418904	0.0819873	0.544769	0.267569	0.160598	0.305936	0.318655	0.154624	0.609502	0.860437	0.125005	0.100672	1.10688	0.217443	0.754621	0.244739	0	0.437072	0.720556
AC026356.1	0.197338	0.300677	0.125927	0.206931	0.0874609	0.144649	0.0959069	0.209164	0.0675879	0.196874	0.253204	0.141093	0.0785181	0.160343	0.259474	0.228988	0.0898358	0.363004	0.0565772	0.150653	0.142392	0.25989	0.0745301	0.24502	0.473218	0.208806	0.156182	0.158398	0.0867201	0.1805	0.122225	0.218713	0.142166	0.0594816	0.166608	0.306049	0.042503	0.180462	0.232277	0.219408	0.389049	1.42112	0.37695	0.918429	0.431371	0.734488	0.0457171	0.874465	0.998061
AC116914.2	0.690174	0.164956	0.117445	0.62439	0.40785	0.770893	1.07337	0.406407	0.70915	0.573792	1.37754	0.239254	0.805525	0.348935	0.950706	0.485374	1.95498	0.141064	0.316599	0.117088	0.811563	0.96954	0.521326	0.24484	0.662017	1.06223	0.388434	0.615538	0.353846	1.22431	1.22135	0.382466	0.957598	0.277376	0.388466	0.41626	0.46247	0	0.203093	1.02315	0.0647938	0.260905	2.34374	0.676239	1.84395	1.03296	0	0.509729	2.06853
THAP9-AS1	3.46128	3.50437	3.39277	4.37273	3.65406	4.10064	2.37382	3.76015	4.83927	3.95693	5.23128	3.45581	3.96923	4.03468	4.30138	3.36325	6.98672	1.89985	1.9172	1.80166	4.91207	2.99439	3.50197	3.13815	5.69085	4.56363	3.01416	4.30593	4.8442	5.59591	4.48342	2.62825	3.04201	3.69438	2.97125	3.79778	3.63785	2.52214	4.49825	7.40682	2.03258	2.53826	6.58257	7.6381	12.0482	2.56541	1.29804	5.00397	7.2442
AC092171.2	1.83275	1.20338	2.77007	3.01804	2.34102	2.16498	2.74623	3.07757	3.23731	2.07497	2.70096	3.31945	3.57239	3.03411	3.30337	3.08034	2.42489	2.22232	2.11598	2.52585	2.92556	3.39182	1.50882	2.84906	2.60734	2.30571	3.05968	4.47391	3.77815	3.99316	3.51296	2.80156	3.79786	2.85525	2.8811	2.27285	2.87999	3.31975	2.23602	2.71931	2.59249	4.59137	5.05464	3.57131	0.825268	3.31888	3.95013	2.98092	4.98378
AL121832.3	0.24125	0.123249	0.383331	0.129465	0.136327	0.204625	0.189942	0.0767121	0.272671	0.108307	0.402412	0.329297	0.155504	0.211705	0.142746	0.118339	0.362427	0.0554726	0.219951	0.142737	0.411983	0.203341	0.102504	0.1027	0.358682	0.194933	0.175661	0.348561	0.278295	0.463398	0.24975	0.22059	0.307049	0.179976	0.161491	0.27126	0.109118	0.146554	0.351405	0.501386	0.173262	0.266758	1.12327	0.744594	1.17338	0.111172	0.28504	0.481074	0.474503
AC138696.2	1.50105	0.968655	1.45595	1.5555	1.06443	1.3832	0.817058	1.2728	1.4395	0.299504	1.4552	1.17079	1.33784	0.585433	0.90226	1.58345	0.728892	0.828358	3.16741	1.52793	1.25159	1.37062	1.36059	0.958498	1.34382	1.15511	1.96416	1.60647	1.18735	0.599117	1.16877	0.915004	1.63409	1.7193	0.362087	0.698389	0.948345	1.88254	1.41345	1.43784	1.01462	1.36185	0.955757	0.882446	0.656245	0.638501	1.11279	1.1086	1.1247
AP001505.1	2.5187	2.65475	4.08883	2.46091	2.31073	2.78513	2.58529	4.2714	1.55277	2.63841	4.52442	2.86821	1.77982	2.55405	4.93926	3.31588	2.47667	3.42853	0.589245	2.42278	5.13718	3.23745	1.88348	3.32385	2.12602	2.09328	2.23262	2.66863	3.2209	4.57407	3.58355	2.7636	3.67741	2.55086	3.90056	4.60933	2.9511	3.67211	2.44582	2.79176	3.23472	3.5648	5.34037	7.10738	1.65172	2.17846	3.22094	4.018	6.0013
AL355312.3	0.055328	0.0396713	0.141225	0.0409536	0.0490432	0.162222	0.0430234	0	0.113698	0.110396	0.094655	0.115079	0.387451	0.0719292	0.145499	0.0350191	0	0.0339254	0.0634506	0.0281593	0.0177434	0.0777235	0	0.0196276	0.0530708	0.212884	0.0817397	0.310872	0.0243139	0.0552079	0.039164	0.0613211	0.33659	0.316862	0.080078	0.0286025	0.0794443	0.159017	0.146529	0.208207	0	0.125493	0	1.30106	0.564407	0.0784494	0.666525	0.143019	3.56522
AL050309.1	1.44043	0.810365	0.865442	1.09901	0.471438	0.918928	0.697901	0.587212	1.25234	1.19385	1.00467	1.05437	0.76182	1.03715	1.14888	0.785466	1.33166	0.407644	1.17412	0.896651	1.02337	0.44361	1.7576	0.825453	0.871513	1.22784	0.968144	0.871595	1.154	0.508585	1.01177	0.478938	1.08561	1.0821	1.02636	0.77329	0.859135	0.816404	0.430387	1.11444	0.655337	0.588086	1.29108	0.521114	0.726626	0.549873	1.41696	0.56465	0.697383
AL137782.1	0.336497	0.114893	0.265853	0.249074	0.227256	0.228196	0.230512	0.266081	0.208547	0.127888	0.269564	0.116649	0.249923	0.225675	0.373224	0.250168	0.204249	0.117903	0.191111	0.110096	0.421374	0.17445	0.393366	0.119373	0.230549	0.246616	0.223201	0.325832	0.271101	0.266481	0.243861	0.284149	0.256528	0.154555	0.270568	0.256793	0.151853	0.28888	0.301771	0.263125	0.347495	0.221701	1.03047	1.27171	1.01578	0.348372	0.935471	0.384615	0.72037
AL163051.1	0.708433	0.444465	0.497276	0.371435	0.137366	0.500736	0.395946	0.219008	0.636922	0.37547	0.643867	0.471981	0.422814	0.306999	0.349312	0.224196	0.456883	0.17647	0.253886	0.360558	0.49698	0.326547	1.32107	0.439805	0.665373	0.391837	0.383136	0.31986	0.593455	0.48599	0.297745	0.331243	0.567076	0.520494	0.331099	0.309009	0.419605	0.474317	0.755687	0.530157	0.486339	0.54231	0.620231	0.607363	0.451675	0.177877	0.90267	1.01373	0.563988
AL138756.1	0.858294	0.392078	1.97172	1.59168	1.23016	1.29885	1.21642	1.04668	1.36077	0.704355	1.49994	2.16672	1.26907	1.2478	1.81504	1.8371	2.08388	0.31407	0.584228	1.04276	1.98891	1.04527	0.496694	1.57151	1.41639	1.21444	1.66829	1.76677	2.06535	1.47803	1.37678	1.46909	1.96359	1.54807	1.67301	1.05559	1.70947	2.06532	2.0694	1.65756	1.18526	1.01734	4.05466	0.75958	2.29984	0.817857	0.692733	0.439636	1.29657
AL596223.2	0	0	0	0.228359	0.136733	0	0.179925	0	0.158497	0	0.13195	0.0401053	0.147303	0.10027	0.115901	0.0325446	0.280892	0	0.919887	0.0392543	0.098938	0.162521	0	0	0.0493207	0.0593525	0.195336	0.165089	0	0.205227	0.709735	0.170964	0.197562	0.139487	0.11163	0	0.0442985	0	0.0907834	0.0527714	0	0.559804	1.96437	1.51141	1.23638	0.0364531	0	0.284814	0.809061
AL049840.2	0.667562	0.547034	0.523357	0.541186	0.517765	0.579199	1.00112	0.960268	0.685916	0.784918	1.86265	1.14055	0.500871	0.464927	1.21811	0.643846	1.04194	1.85659	0.568705	0.412562	1.34567	1.82531	0.378184	0.592045	1.14344	1.1742	0.493116	0.727203	0.817216	2.66445	1.28259	0.528479	1.17559	0.474296	0.506096	1.98435	0.520349	0.299007	1.31895	1.54969	0.429743	0.378535	1.54841	1.68193	1.91093	1.52121	0.26512	2.44753	2.10794
AL355488.1	0.360182	0.303172	0.455686	0.620147	0.681915	0.806801	0.840239	0.556051	1.05394	0.585872	1.41324	0.824481	0.65051	0.432627	0.803051	0.515416	1.5684	0.619347	0.68963	0.328772	0.738251	0.676467	0.195177	0.633319	1.03646	0.759213	0.599875	0.823331	0.929046	1.78919	0.606905	0.501165	1.06049	0.368181	0.538302	0.910764	0.54641	0.398938	1.37554	1.44649	0.337405	0.346317	3.22318	1.54206	3.35475	0.538457	0.130606	1.27513	1.35525
Z69706.1	1.01991	0.351022	0.593558	0.332171	0.379703	1.07654	1.76065	1.21075	0.754525	0.366304	1.70996	0.604586	0.428534	0.583411	1.88514	0.490609	0.89146	0.938065	0.589499	0.591757	2.70822	0.343859	0.184895	0.607847	2.38705	1.17728	0.387458	0.785909	0.349595	1.50619	1.34282	0.203469	0.548622	0.553358	0.531413	0.569436	0.773239	0.959336	1.11645	1.13049	0.861745	0.388639	0.46757	0.479672	1.15933	1.85104	0.567075	2.21457	1.74237
AL353804.2	0	0.0691675	0.0492456	0	0.128261	0	0	0.068164	0.132157	0.0962383	0.330065	0.100321	0	0.0418032	0	0.0407042	0	0.118299	0	0	0	0.135512	0	0	0	0	0.0407184	0.0516201	0.0423916	0.192512	0.136566	0	0.0617737	0.0581531	0.0465391	0.0498689	0.11081	0.0504089	0.113545	0.132005	0.108674	0.13128	0.307109	0.37807	0.562315	0.0455926	0	0.356223	0
AL139349.1	0.232052	0.249578	0.296156	0.0286273	0.102846	0.194393	0.180445	0.204964	0.596079	0	0.760904	0.422323	0.295457	0.175979	0.392295	0.171353	0.492981	0.142287	0.29273	0.0885773	1.00464	0.448223	0.0438203	0.0411602	0.519364	0.223215	0.29385	0.434611	0.331419	0.540278	0.410645	0.0964452	0.334349	0.349725	0.167928	0.479848	0.166599	0.0909457	0.6487	1.19079	0.163388	0.342116	1.99467	0.454732	0.676338	0.383863	0.322555	0.428455	0.434678
YTHDF3-AS1	1.95806	1.47082	1.11859	0.943225	1.03312	1.67935	1.01506	0.560027	1.62868	1.11626	1.03686	0.678775	1.48397	1.01015	0.805656	0.845888	0.679149	0.343034	1.86057	1.06774	1.34558	1.08061	2.21854	0.562313	0.953992	1.04041	1.16104	1.27231	1.47509	0.527217	1.15501	0.800889	1.19418	1.06798	1.23704	1.08454	0.910401	1.38863	1.07006	1.08453	0.892855	0.993983	0.504634	2.00988	1.49468	0.484755	2.50572	1.20511	1.3274
AC007566.1	0.286506	0.479338	0.341277	0.377014	0.232798	0.640028	0.556971	0.573608	0.196255	0.666941	0.708	0.645576	0.36479	0.331086	0.394658	0.402978	0.463746	0.322074	0.941893	0.218727	0.765675	0.838493	0.288552	0.338794	0.946593	0.955398	0.282183	0.511046	0.419683	1.01648	0.54081	0.291078	0.550411	0.287862	0.529855	0.789935	0.411388	0.249528	0.871184	1.37221	0.215178	0.259937	1.33779	0.655016	0.974225	0.406236	0.265498	0.670065	1.35959
LINC00205	0.770058	0.483128	1.08107	1.57936	0.842566	1.24986	2.11452	1.08827	0.807714	1.2484	1.93495	1.46403	1.10302	1.31396	1.73576	1.38096	2.07415	2.25759	1.07077	0.85733	1.6515	1.87617	0.781615	2.04884	1.55422	1.68517	1.20876	1.59677	1.25843	1.36068	1.03907	0.85347	1.84921	0.913936	0.824287	1.84117	1.49271	1.24493	1.96858	1.5971	0.826854	1.10255	1.53224	2.45216	1.68331	1.21697	0.133799	2.00832	2.30795
AC009022.1	0.576688	0.518179	0.642835	0.453879	0.660005	0.78886	1.00046	0.595772	1.57136	0.507966	1.10524	1.10743	0.634345	0.495861	1.0284	0.598333	1.3625	0.238349	1.12262	0.404036	2.58098	1.12288	0.73198	0.485555	1.21135	1.85377	0.45064	0.931644	0.996058	1.65347	1.151	0.361041	1.25864	0.785514	0.515058	1.14911	0.591168	0.35762	1.37262	2.47608	0.456418	0.434628	1.40486	0.761736	2.61696	0.571861	0.16235	2.5757	1.74754
AL161729.4	0.0468816	0.100845	0.287197	0.242911	0.0935014	0.176731	0.054683	0.149073	0.144512	0.140314	0.200512	0.146267	0.268611	0.152371	0.105674	0.0890191	0.0853692	0.129358	0.129034	0.0715814	0.0451041	0.197574	0.106237	0.399151	0.40472	0.162347	0.118734	0.0752612	0.216322	0.0935596	0.149334	0.0779396	0.405292	0.169573	0.20356	0.072708	0.0807796	0.183738	0.12416	0.481151	0.158445	0.0638012	1.38806	0.964635	1.43473	0.0997099	0.130332	0.675177	0.210764
AL390719.2	3.5497	1.65357	4.91698	4.03326	3.47215	5.54006	7.91159	2.94763	8.31677	1.99624	13.2674	5.749	7.01691	3.45374	5.37665	2.73329	8.27536	0.727832	3.26703	2.05403	12.6816	7.12249	2.43365	2.3581	6.15915	7.5685	2.74856	7.5859	7.07923	8.97906	7.29792	3.04462	7.47092	5.33612	3.79593	4.03246	3.214	3.1014	11.2172	22.6476	3.91618	6.20003	11.6392	34.16	19.1268	0.945712	7.54262	9.74347	9.5038
AC107375.1	0.510129	0.387288	0.681691	0.607114	0.425583	0.427343	0.956696	1.0814	0.421379	0.957983	1.18075	0.97522	0.706824	0.429125	0.913128	0.519139	0.74678	1.00278	0.695141	0.496353	1.36651	0.895771	0.260663	0.904843	1.24728	0.877492	0.576318	0.77879	0.718681	1.00806	0.732812	0.473926	0.903153	0.560783	0.62251	1.16346	0.568752	0.768357	0.635768	1.02657	0.481728	0.421986	1.12729	0.882051	1.24631	0.581484	0.0556146	0.73135	0.652036
AC073611.1	0.310418	0.519344	0.290526	0.306361	0.229298	0.693446	0.563227	0.255905	0.318953	0.309688	0.472056	0.322826	0.329363	0.381139	0.544215	0.502103	0.502451	0.158616	0.332257	0.342307	0.398199	0.908476	0.508031	0.330363	0.430089	0.437943	0.393087	0.359905	0.272827	0.378576	0.292974	0.0860106	0.265044	0.374265	0.174719	0.561661	0.178289	0.216283	0.669861	0.849563	0.728554	0.610203	0.955314	1.11522	2.03568	1.90728	0.767086	0.53494	1.16295
AC073046.1	0.514976	0.800037	1.3583	1.1859	0.722758	0.359503	0.600672	1.57686	0.999477	0.513765	1.32153	1.65131	1.09281	1.3018	1.54772	1.08649	0.833554	0.263139	0.708694	0.87366	3.24796	1.266	1.03731	0.243584	2.41495	0.660487	1.34047	1.10229	1.50871	1.31319	1.57962	1.04639	0.934366	0.672638	0.703934	1.5086	1.18311	1.03157	2.72769	1.58558	1.06361	0.934442	1.25694	0.840964	0.875554	1.66319	0	2.28202	1.80068
AL356299.3	0.0380813	0.0409575	0.145804	0.0281876	0.0506333	0.0957039	0.310928	0.0807266	0.0391283	0	0.195448	0.0594052	0.0363648	0.0990151	0.214595	0.048206	0.277377	0.0700507	0.0524063	0.116289	0.256462	0.200609	0	0	0.219166	0.131872	0.0482228	0.213968	0.0502044	0.227992	0.242603	0.0316546	0.0731586	0.103306	0	0.147649	0.0984242	0.0298496	0.100853	0.11725	0.0321758	0.207299	0.76379	0.671623	1.83136	0.296974	0.105867	0.126562	1.28401
AL592546.2	0.48372	0.93646	0.592655	1.07414	1.28632	1.2967	0.2633	0.922873	1.65673	0.482582	0.606868	1.08157	1.17019	0.985215	0.763237	0.959314	1.46805	0.118641	0.998521	2.60962	0.558456	0.373735	2.33844	0.858001	0.52585	0.297792	1.77637	0.957731	1.08411	0.547026	1.47233	1.95683	1.14612	1.19558	1.79693	0.425111	1.08352	1.06165	0.711705	0.9598	1.52584	1.20687	0.338797	0.189581	0.634433	0.297208	0.717203	0.428703	0.362441
AC093799.1	0.0772167	0.166098	0.0886932	0.0571555	0.102668	0.145543	0.0900662	0.163688	0.198349	0.115553	0.132102	0.24091	0.0737363	0.150578	0.130539	0.21993	0.35152	0.355101	0.398487	0.0589494	0.185723	0.203385	0.087489	0.246534	0.1111	0.0891315	0.0977805	0.15495	0.178147	0.192623	0.163974	0.22465	0.148342	0.034912	0.0279396	0.0598772	0.0665243	0.181577	0.374913	0.27737	0.260969	0.131355	0.147498	0	0.0843959	0.437941	0.214665	0.171086	0.17357
AL606834.2	0.719859	0.435504	0.378973	0.366325	0.388835	0.508813	0.682215	0.762997	0.647195	0.269312	0.846679	0.947489	0.988156	0.76038	1.16625	0.82582	1.06505	0.372427	0.309578	0.343475	0.519424	0.663627	0.254882	0.383056	0.690491	0.675135	0.797621	0.613925	0.533827	0.538722	0.668789	0.411383	0.90755	0.732307	0.586055	0.593098	0.813984	0.811116	0.953225	0.9235	0.304113	0.397986	0.386735	0	1.27853	0.765514	0	0.647952	0.303398
AC002064.3	0.23165	0.0830488	0	0	0	0	0	0.081844	0.0793397	0	0.330255	0.180682	0.0737363	0	0.348104	0.0488732	0.562432	0.355101	0.0531316	0	0.222867	0.162708	0.087489	0	0	0.356526	0	0.0619798	0.152698	0.154098	0.245961	0	0.148342	0.069824	0.0558791	0.299386	0.133049	0	0.136332	0.396242	0	0	0.0737487	0	0.168792	0.164228	0	0	0
AL035071.2	0.0972359	0	0.0372293	0	0.0969644	0.061092	0.113417	0.154594	0.249773	0	0.207939	0.265447	0	0.0632058	0.219176	0.030772	0	0.0447165	0.0669065	0.0742326	0	0.153669	0	0.0517417	0.0466344	0.11224	0	0.0780487	0.0320477	0	0.103243	0.0404131	0.0467004	0.0439633	0.105549	0.188502	0	0.114326	0.171677	0.199589	0	0.0330821	0.371475	0.428727	0.850211	0.0689352	0	0.10772	0.43714
AC020916.1	3.87442	3.76117	7.58085	3.16578	6.80729	3.39846	21.5833	4.75991	3.77414	4.00962	13.827	5.45523	5.69383	1.77438	7.59902	2.14971	12.4381	2.46437	2.51012	2.23759	26.0563	4.86396	3.33514	4.16352	4.11453	2.48297	4.65932	7.94638	2.44612	9.9035	6.71827	1.35933	2.75495	4.01535	1.4383	13.1979	1.9724	4.80189	8.11764	11.7483	4.8466	19.3446	14.7896	48.919	35.9395	7.7052	2.83263	8.64011	24.6285
AC009041.3	0.489685	0.376193	0.535681	0.284792	0.302292	0.48347	0.081596	0.63025	0.503148	0.3664	0.388956	0.409225	0.400811	0.272835	0.512471	0.44277	0.318462	0.257365	0.168472	0.587461	0.639375	0.479071	0.198153	0.186124	0.905863	0.565245	0.553656	0.701887	0.507238	0.698031	0.371383	0.348896	0.503969	0.347916	0.480928	0.461092	0.512279	0.411251	0.216144	0.502569	0.236426	0.238004	0.167033	0.205627	1.98794	0.396756	0.388953	0.503737	0.235871
LINC01806	1.41761	1.53478	0.841112	0.764398	0.505545	1.69875	0.53657	0.427882	1.03215	0.646258	0.867306	0.724933	0.66341	0.683484	1.56595	0.570441	0.957342	0.077713	0.956056	0.680882	0.98451	0.603362	1.61684	0.73936	0.918524	0.953636	0.42798	0.836454	1.15724	0.843099	0.837323	0.405797	0.793572	1.10361	0.706564	1.092	0.630876	0.794752	0.646445	1.08877	0.793226	1.12432	1.66777	2.23526	1.2108	0.41931	0.39149	1.41446	0.126618
AL451042.2	1.03679	0.530998	0.982951	0.62125	1.4934	1.27178	0.575866	0.784941	1.16675	0.517175	0.760172	1.21301	1.20221	1.31578	1.00157	1.06245	1.07882	0.181636	2.51388	2.01647	1.78121	0.390122	1.17471	0.630517	1.06552	1.13978	1.40668	1.06997	1.6272	0.714323	1.99199	0.984936	0.948472	0.848238	1.23262	0.937966	1.04209	1.78015	0.544801	1.19074	1.12629	0.806266	0.683726	0.653049	0.431689	0.175007	0.343131	0.847763	0.388421
AC245884.8	0.126793	0.027274	0.155348	0.300326	0.151727	0.31865	0.650728	0.107513	0.57323	0.227691	0.563986	0.454922	0.363235	0.313192	0.400121	0.36916	0.831186	0.256561	0.244285	0.271033	0.463547	0.614501	0.0861966	0.40482	0.437834	0.468346	0.24084	0.590287	0.484758	0.556679	0.323103	0.0843165	0.706396	0.229308	0.110107	0.393284	0.436944	0.13914	0.559659	1.14514	0.128557	0.483149	1.7196	1.34172	2.32818	0.377538	0	1.03944	1.19704
AC007849.1	0	0	0.0666208	0.0643974	0.0289192	0	0.152217	0.046107	0.0893925	0	0.0744201	0.0339293	0.0830792	0.0282762	0.0980526	0.0275329	0	0.0400095	0	0	0	0	0	0.0925905	0	0	0.055085	0	0	0	0.0461876	0	0	0.0393355	0	0.033732	0.0374767	0.0681945	0	0	0	0.0591995	0	0.127866	0	0	0	0	0
TMEM92-AS1	0.119017	0.352016	0.341765	0.11012	0.118684	0.186942	0.173528	0.157686	0.122289	0.222631	0.0254517	0.0232076	0.0568261	0.0386819	0.469476	0.15066	0.108362	0.191565	6.55148	0.0454303	0.114504	0.689666	0.0674249	0.126664	0.0570805	0.309108	0.113034	0.214946	0.0588396	0.296896	0.094777	0.0741985	0.171484	0.0807165	0.0861283	0.34609	0.230706	0	0.262667	0.122148	0.65364	0.0809849	0.65361	0.612221	0.325206	0.738296	0.165435	0.2637	0.200647
AC010834.3	0.451541	0.357844	0.345768	0.35182	0.173792	0.388217	0.665281	0.705305	0.488374	0.640154	0.772495	0.31512	0.521965	0.463442	0.241059	0.361006	0.476031	0.677605	0.13082	0.108859	0.388692	0.450697	0.0807806	0.429969	0.889034	0.548648	0.346085	0.400592	0.563958	0.758839	0.50467	0.217301	0.616355	0.451291	0.309567	0.608146	0.491387	0.242167	1.36368	0.634156	0.220879	0.355765	2.29249	0.908133	1.09095	0.336968	0.0660682	1.29007	0.908147
ARHGEF2-AS1	0.50085	0.17956	0.767053	0.535494	0.480953	0.349641	0.519284	0.412894	0.68616	0.249836	0.999661	0.954927	0.31885	0.253217	0.439036	0.634011	0.709352	0.0511842	0.421211	0.0849694	1.82036	0.351791	0.18916	0.414579	1.01421	1.47745	0.563762	0.848706	0.513562	0.666349	1.12267	0.416326	1.17601	1.05676	0.40272	0.819915	0.191776	0.174483	1.57207	1.42786	0.0470199	0.113601	0.690958	0.163579	0.486592	0.552341	0	0.924758	0.375275
AC004943.2	0.617575	0.436204	1.37285	1.0473	0.379927	0.619664	0.983753	0.47384	0.549315	0.586235	0.942217	1.0245	0.68216	0.75794	0.997293	0.647586	0.637818	0.495954	0.320293	0.256847	0.948881	0.786625	0.349866	0.750448	0.848781	0.750107	0.773288	1.04691	1.11798	0.942745	0.371905	0.877296	0.947375	0.779326	0.763762	0.886311	0.603528	0.606906	1.20836	0.841945	0.49065	1.29518	1.80032	1.32762	1.59177	0.591395	0.499687	1.10283	1.5954
AC080013.4	0.687693	2.18192	0.947883	1.09441	0.845787	0.95055	1.28341	0.692458	0.95391	0.82329	1.4118	1.23369	1.05071	1.00579	1.51135	1.08816	1.12703	0.790634	1.41957	0.472503	1.02551	1.05058	0.70126	0.951442	1.58313	0.912877	0.805522	0.74519	1.13327	1.40671	0.803195	1.54342	0.990853	0.777316	0.945554	1.78644	0.947946	0.673802	2.70154	1.48215	1.04588	1.70798	2.66007	0.202142	1.35294	1.65763	1.33826	0.952306	1.15936
AL133243.2	0.426764	0.177676	0.442755	0.356649	0.375236	0.155689	0.578068	0.671211	0.183886	0.494431	0.459261	0.354342	0.276068	0.205818	0.57407	0.392101	0.426161	0.443165	0.198924	0.315294	0.503296	0.638186	0.187176	0.673951	0.514993	0.317816	0.444537	0.419903	0.31761	0.728045	0.350809	0.320413	0.370261	0.323663	0.278947	0.51241	0.533713	0.366887	0.656261	0.310834	0.325688	0.580783	1.9065	0.728386	1.38428	0.283034	0.114814	1.50985	0.402285
AC007991.2	0	3.05897	0.167532	0	0.145447	0	0.255188	0	0.449592	0	0.187145	0	0	0	0.493147	0.138474	0	0.201224	0	0.334047	0	0.69151	0	0	0.209855	0	0	0.17561	0.144215	0	0.232296	0.545577	0.840606	0	0.158324	0.339304	0	0	0	0.224537	0	0	0.208955	1.28618	0	1.70615	0	0	0.983564
AC060780.1	1.25537	0.987451	1.00435	0.651841	0.635276	1.4362	1.24573	1.5292	1.09737	1.31784	1.58672	1.12531	0.751479	0.621152	0.971387	0.675977	0.818856	1.77503	0.863802	0.801039	1.37001	1.65823	1.16762	0.857453	1.70738	1.44908	1.00839	0.932455	1.08688	1.43961	0.557044	0.654143	1.43983	0.999638	0.949147	1.38029	0.968541	1.1015	1.20747	1.46147	0.918211	0.879717	2.68431	2.14795	1.43353	0.956411	1.51058	1.32846	3.49574
AL049539.1	0.048618	0	0	0.0719736	0.0323215	0	0.113417	0	0	0	0.207939	0	0	0.0632058	0.109588	0.123088	0.177062	0	0.133813	0.0371163	0.0467746	0.051223	0	0	0	0	0.123131	0.0780487	0	0.0485124	0.103243	0.0404131	0	0	0	0.113101	0	0.0762174	0.128758	0.0498972	0	0.132328	0.325041	0.142909	0.425106	0.0689352	0.135159	0.215441	1.09285
AP001469.3	0.499823	0.347842	0.38274	0.261153	0.156369	0.39408	0.377234	0.290857	0.513565	0.234658	0.360482	0.527446	0.280761	0.369491	0.331363	0.396996	0.37477	0.27042	0.141614	0.134675	0.367726	0.53693	0.166563	0.312905	0.535835	0.554322	0.397134	0.22813	0.445754	0.645425	0.385018	0.171077	0.55542	0.283589	0.326244	0.448382	0.312404	0.361054	0.770004	0.392275	0.223577	0.406792	1.59125	1.64204	1.47821	0.132012	0.653893	0.618861	1.07946
Z98884.2	0.283914	0.427501	0.913111	0.546395	0.603992	0.356759	0.728551	0.421299	0.350064	0.424869	0.388575	1.06294	0.542234	0.406012	0.83195	0.682858	0.723792	0.731166	0.546999	0.346796	1.0926	1.07686	0.38602	0.362587	0.871459	0.655445	0.503333	1.27618	0.449157	1.35983	1.20581	0.472001	0.436345	0.410771	0.452009	0.880637	0.39136	0.222543	1.05267	1.80658	0.239885	0.656844	1.51851	0.667635	1.73774	0.845377	0	0.69196	1.6593
AP001033.4	0.266987	0.287152	0.221483	0.279965	0.369779	0.419361	0.311415	0.589554	0.434351	0.299653	0.513855	0.416488	0.382429	0.144623	0.47643	0.183068	0.567199	0.266025	0.229637	0.254781	0.342485	0.304733	0.252087	0.331498	0.277435	0.539321	0.23948	0.339313	0.205322	0.577215	0.519714	0.166447	0.363313	0.301782	0.322015	0.31055	0.249184	0.244154	0.569591	0.616526	0.319576	0.257367	0.361244	0.130798	1.16724	0.362786	0	1.2324	0.700165
AC108134.3	0.319756	0.325807	0.386612	0.224225	0.212576	0.444092	0.333707	0.338918	0.69168	0.352584	0.547038	0.577565	0.449981	0.185971	0.265541	0.394119	0.214517	0.356012	0.509519	0.154175	0.728604	0.815627	0.476703	0.447765	0.371282	0.699339	0.298356	0.310694	0.499204	0.419819	0.446724	0.153881	0.695117	0.197835	0.219218	0.300154	0.159488	0.395744	0.371418	0.846333	0.398145	0.137418	9.67621	1.63246	10.4846	1.06187	0.0935717	0.223727	1.39969
AC007485.1	0.758298	0.582551	0.414763	0.0801842	0.504121	0.816735	0.50542	0.68892	0.556534	0.486331	0.277992	0.422469	0.724119	0.281664	0.488359	0.27426	0.789044	0.0996353	0.74539	0.413504	0.104221	0.228266	0.490958	0.922309	0.623453	0.375131	0.137178	0.434761	0.571258	0.216186	0.345062	0.0900467	0.208111	0.489785	0.470361	0.504015	0.559967	0.849121	0.382524	0.222357	0.0915291	0.36856	0.517315	0	1.4208	0.0767992	0	0.720054	0.487008
AC004918.5	0.940876	0.674626	0.905214	1.08929	0.801922	1.06102	0.900467	1.22739	0.669284	0.505433	1.69219	1.59944	0.806317	0.705684	1.3323	0.977253	0.83468	0.843184	0.514601	0.552531	2.6924	1.32172	0.601357	0.693227	2.56862	1.44807	0.947044	1.39424	1.17679	1.92581	1.53692	0.561502	1.45993	0.850796	0.907839	1.34695	0.81059	0.775316	2.02324	2.4017	0.631897	1.01778	2.11982	0.850964	1.3184	1.11172	1.6767	1.55013	1.19304
SNHG6	26.5748	41.3235	13.5527	19.4453	12.825	21.7674	18.2225	17.716	25.007	36.9297	25.0129	21.6211	22.1642	19.4379	20.794	24.7148	23.104	29.2813	21.007	15.5199	14.5139	26.1887	32.6851	27.3109	23.774	23.59	21.3469	18.5011	24.3238	17.1066	13.3577	17.3894	25.2344	22.4932	18.3895	25.3809	20.1814	23.2991	18.1044	21.1396	24.0412	34.0346	78.9638	62.1234	86.5303	29.7763	50.4464	54.5982	71.7631
AC008760.1	0.487951	0.279896	0.448379	0.409337	0.497402	0.490517	0.531207	0.344795	0.802187	0.292082	1.19653	0.532828	0.465958	0.31718	0.989888	0.658863	0.947772	0.209437	0.537203	0.39735	1.56483	0.616916	0.479149	0.519303	0.842479	0.713442	0.391336	0.574443	0.750505	0.908864	0.794413	0.324483	0.749929	0.911885	0.282491	1.08469	0.25223	0.280482	1.43586	1.76946	0.164912	0.686188	1.7088	0.956198	2.70215	0.392056	0.271303	0.973018	2.19366
AC125257.1	2.14778	1.39256	2.40868	2.70601	2.13166	2.38303	2.87831	1.96166	2.32422	2.88357	2.59294	3.18412	2.53827	2.50508	2.30045	3.00324	2.85698	1.94741	2.21155	2.15716	2.12497	2.52767	1.35483	3.06392	2.22088	2.40886	2.56546	3.2462	2.43994	2.6371	2.24004	2.27914	2.43618	2.15565	2.92116	1.63005	2.67714	2.11335	1.9431	2.7202	2.58693	3.03694	4.45181	4.54465	8.058	2.3218	1.94795	4.22719	4.04033
SNHG25	0.561905	0.863349	0.983495	0.772422	0.80048	0.302603	0.65541	0.680659	2.30941	0.720749	1.85394	0.563495	0.843194	0.573967	1.26657	1.52421	1.16937	0.0738305	0.497106	0.490255	1.31289	0.845732	1.72807	0.427149	1.07796	0.55595	0.711547	0.773187	0.846613	1.52186	1.02277	1.13433	1.15659	1.45174	1.10371	0.87145	0.41494	1.38425	1.55899	0.98861	1.28865	1.63863	4.29334	65.1232	18.4244	1.47963	197.942	2.13426	38.7942
AC092171.4	0.494334	0.0379765	0.16223	0.470448	0.258214	0.266214	0.288297	0.374255	0.362804	0.369878	0.453056	0.440651	0.16859	0.252473	0.397951	0.424625	0.385782	0.227332	0.0971838	0.21565	0.373679	0.297612	0.240041	0.187891	0.237083	0.570611	0.156495	0.453473	0.302577	0.669425	0.299927	0.205455	0.373086	0.063858	0.306628	0.0547611	0.395462	0.166062	0.467563	0.724772	0.208837	0.120132	1.2815	2.28338	0.15437	0.225294	0.196323	0.312935	0.23811
UBE2D3-AS1	0.909811	1.52215	0.870861	1.1224	0.823264	1.52433	0.648517	0.642887	0.830956	0.794211	0.886341	0.611073	0.941203	0.837816	0.598143	0.655831	0.782342	1.13898	0.660806	0.559519	0.583543	0.825427	1.28856	0.914475	0.896934	0.81682	0.832076	0.811423	1.06618	0.580006	0.751346	0.75627	0.995305	0.891264	0.768132	0.705507	0.783827	0.594289	0.892412	0.72625	0.790073	0.911425	0.748262	0.66858	0.331467	0.662926	0.42155	0.867925	0.624892
C2CD4D-AS1	0.749735	1.18583	1.68856	0.652883	0.527747	1.05293	0.668733	0.747918	0.725033	0.725972	0.829946	1.65114	0.631714	0.659351	0.844977	1.06072	0.72277	0.162252	0.576573	0.404025	1.23047	0.650512	1.14929	0.516293	1.5229	0.865421	0.698087	0.849589	0.901199	0.880126	0.280959	0.696527	1.48269	0.757715	1.0532	0.820768	0.303961	0.587672	0.856521	1.49366	1.41599	0.600185	1.89546	0	0.964049	1.00051	1.34865	1.22144	1.09047
AC012181.1	0.766202	0.892745	0.58672	0.708924	0.424479	1.12325	1.37779	0.406058	1.34492	0.5733	0.764643	1.12054	1.21944	0.581059	0.755594	0.505163	1.10455	0.205542	0.30754	0.365587	0.706437	0.941799	1.08516	0.509645	1.16366	0.773876	0.545767	0.922515	1.03117	1.30609	1.2203	0.636897	0.981309	0.923794	0.66999	0.519878	0.302548	0.500483	0.789127	4.35776	0.647382	0.369298	0.701299	0.375366	2.02381	0.430032	0.35501	0.565879	0.932909
SNHG22	0.0344244	0.0370245	0.177934	0.210217	0.108706	0.054071	0.160612	0.173315	0.09727	0.0901515	0.456423	0.302066	0.172582	0.195796	0.290981	0.196096	0.250741	0.166225	0.230947	0.118263	0.231835	0.145076	0.0975099	0.109909	0.1651	0.109275	0.207063	0.234868	0.170188	0.334909	0.146204	0.0643836	0.1984	0.10895	0.186838	0.146818	0.148288	0.0944414	0.205129	0.388632	0.167244	0.175681	0.419199	1.01188	0.865376	0.085418	0.311028	0.371829	1.27677
AL158212.3	1.02177	0.685422	1.72617	1.05649	0.938383	1.28393	1.51125	1.89246	1.26092	1.56057	1.39212	1.95542	1.40825	1.24618	0.759798	1.00007	1.25638	2.61102	1.42062	0.916755	2.14341	1.53709	0.507238	2.10197	1.65705	1.17335	1.52398	1.33591	1.49286	1.67648	1.0793	1.02445	1.79598	1.11445	1.04052	1.2375	1.44294	1.94033	1.19028	2.12974	1.11252	0.867286	2.2737	1.14563	1.51972	0.769188	0.409975	0.700171	1.45619
AC012306.2	3.08168	2.32392	3.28202	1.36339	1.5071	2.13647	2.72686	2.10248	1.74699	2.1203	2.42397	1.35378	3.01043	1.61175	3.23363	1.54696	1.16102	2.11764	1.92547	2.19039	2.31735	2.20186	2.04683	1.62099	1.80076	2.12614	1.7942	3.44027	2.14811	1.48448	2.10616	1.88441	2.27964	2.69055	1.79434	1.75792	1.12912	3.05414	3.43968	2.25393	1.55628	2.28975	0.744277	2.29062	1.85832	1.23049	1.77252	1.72661	0.716597
TMEM9B-AS1	0.652953	0.4131	0.867647	0.525959	0.357483	1.80989	1.05281	0.895635	1.34181	0.86217	1.64275	1.96226	0.953623	0.699071	1.53673	1.02104	0.734381	1.02448	0.502144	0.645095	1.82916	1.19378	0.913891	0.919729	1.43684	0.975384	0.303986	1.06363	0.886138	0.824001	0.489382	0.319271	0.68254	1.82342	1.23689	1.19136	0.727989	1.09889	0.966351	1.22201	0.243395	1.07155	2.45783	1.97576	0.839602	0.43568	0.587279	1.53182	0.86337
AC008982.2	0.27159	0.292103	0.381279	0.167525	0.210647	0.341273	0.422379	0.863595	0.744152	0.270951	1.47134	0.812032	0.432248	0.147117	0.969289	0.229199	0.412127	0.457958	0.186877	0.172783	1.13227	0.524594	0.102573	0.385387	1.21571	0.261248	0.114639	0.290664	0.4774	1.17433	1.15347	0.338634	0.347837	0.0818626	0.425837	0.491406	0.350973	0.354805	1.43854	1.99761	0.267718	0.308006	0.562016	0.399159	0.494735	0.352996	0	0.651895	0.813984
AC013403.2	0.185964	0.300014	0.462806	0.344124	0.185444	0.292096	0.759183	0.936261	0.477691	1.18273	0.516987	0.580191	0.399559	0.362643	0.681159	0.264832	0.677262	0.940723	0.511835	0.14197	0.402554	1.42048	0.158027	1.23695	0.312159	0.321987	0.44154	0.522438	0.459684	1.06697	0.394904	0.270515	0.625201	0.210199	0.471014	0.576817	1.00133	0.51018	0.656666	1.14514	0.471375	0.284713	0.62164	0.40997	0	0.263677	0	0.515039	0.418015
IRF1-AS1	1.2121	2.46762	1.11759	0.622541	0.879814	1.08404	0.91248	0.835734	2.00158	0.85141	1.49705	0.926118	1.7923	1.14365	0.829405	0.89635	1.02476	0.881628	1.0553	1.31485	1.00253	1.57025	0.742729	0.671316	1.17748	1.12787	0.851634	0.905909	1.13937	1.68462	1.43472	1.87887	1.40487	0.984212	0.814502	0.601834	0.671309	0.911314	1.04546	1.61529	0.783774	0.521796	0.85348	1.9814	0.817858	1.1136	0.240691	0.674824	0.743704
AC005899.7	0.525958	0.484871	0.230144	0.111232	0.0999027	0.283245	0.262921	0.557476	0.231608	0.11244	0.706991	0.23442	0.358751	0.0488408	0.254045	0.428011	0.410462	0.621966	0.465304	0.172085	0.144576	1.58326	0.255397	0.559752	0.5045	0.260192	0.0951467	0.180931	0.0495283	0.449842	0.398893	0.0624567	0.649559	0.0679432	0.27187	0.291322	0.388395	0.176686	0.19899	0.462683	0.12697	0	1.00467	1.32516	1.14972	0.106536	0	0.58267	0.67558
AL122010.1	1.98361	1.60007	3.22778	2.29416	2.0811	2.64834	2.386	2.20103	2.484	2.59737	3.60566	3.09435	2.54534	2.05498	4.57599	2.49138	2.53973	1.36832	2.32458	1.75096	3.25025	1.95928	1.65051	2.50689	3.29997	2.5759	2.84548	2.78634	2.43122	4.20602	3.06051	2.34447	2.56035	2.29818	2.33264	2.81198	2.61681	3.23114	3.03708	4.00799	2.19975	2.10898	2.93059	2.64203	2.57455	1.16457	1.55095	1.88847	2.0204
AC010976.2	0.733378	1.12681	0.421189	0.465294	0.435316	0.263298	1.19147	1.83227	0.161473	1.41104	1.68035	0.81717	0.250115	0.323484	1.03318	0.198935	0.667724	2.09585	0.558693	0.599872	1.20955	3.36665	0.118706	2.28575	0.351729	0.816306	0.199004	0.588663	0.276242	2.66579	0.945545	0.283034	0.427703	0.284213	0.246406	5.05731	0.338478	0.451669	0.647418	1.26342	0.863081	0.249513	0.975613	0.230969	1.2596	0.427083	0.145629	0.377211	0.529878
Z83843.1	0.284623	0.332173	0.449812	0.349633	0.322074	0.426136	0.776989	0.962805	0.504007	0.770298	1.17071	0.755744	0.410582	0.401515	0.689335	0.379461	1.36739	0.896745	0.35002	0.212666	0.617577	0.695451	0.150951	0.850727	0.697049	0.60116	0.42177	0.627047	0.447085	1.54088	0.842319	0.291962	0.634047	0.350465	0.46015	0.892227	0.349555	0.308541	1.12266	1.19952	0.322351	0.510963	7.31075	2.22507	3.34913	0.588175	0.0841765	1.08011	0.55811
LINC00852	0.504118	0.180731	0.875	0.48509	0.781995	0.570116	0.666408	0.748059	0.846032	0.377199	0.661207	0.943684	0.673955	0.84107	1.19313	0.659421	0.917976	0.386387	0.901877	0.55163	1.05084	0.601947	0.285591	1.03725	0.564143	0.446127	0.851162	0.768821	0.631374	0.888675	0.802892	0.446979	0.790917	0.319098	0.55938	0.325763	0.883101	0.961527	0.519202	1.01752	0.482733	0.411633	0.898757	0.345758	0.734652	0.309741	0.140146	0.372317	0.415497
MID1IP1-AS1	0.534151	1.02132	0.954396	0.966475	0.394563	0.447467	0.276906	1.50976	0.670801	1.06579	0.863056	0.601794	0.396725	0.925897	0.401338	0.638602	0.432295	1.47386	0.449217	0.317167	0.628098	1.56326	0.403473	0.568471	0.967789	0.68508	0.676402	0.666942	0.821563	1.1252	0.3781	0.592009	0.68411	0.214672	0.858993	1.97897	0.357922	0.511731	1.30984	1.34006	1.05307	1.81732	1.13369	1.5701	0.259473	1.43059	0.164995	1.64374	1.33409
CASC9	1.99977	2.08564	0.997683	1.51386	0.765446	0.571105	1.07792	0.690478	1.5255	1.63233	4.06916	2.96594	1.6637	3.17097	1.22935	1.31367	2.84147	0.37622	0.813098	2.6023	1.71989	1.0375	3.79351	0.951268	1.7874	1.17166	2.46519	2.20102	1.58783	0.650026	1.14209	3.58903	1.55709	1.23294	3.43154	1.52721	1.61844	1.40125	2.43408	3.06304	3.82732	1.40198	8.18966	10.7767	2.54998	3.10398	0.294818	8.74412	2.21352
MACC1-AS1	0	0	0	0	0	0	0.0407342	0	0.0358829	0	0.0896186	0	0	0	0.0393591	0	0	0	0.0480596	0	0	0	0	0.0743332	0	0.0403114	0	0.0280316	0	0.0696938	0	0	0	0.0315792	0	0.0270806	0.0601738	0	0	0	0	0	0.0333543	0.102653	0.0763394	0	0	0	0
AC048344.4	0.127034	0.227715	0.194553	0	0.0844529	0.0532092	0	0	0.0435089	0.0633676	0.0362216	0.0990838	0.0808721	0.0275251	0.238619	0	0.154215	0.0389466	0	0	0.0814783	0.0446136	0.239889	0.0901308	0.203085	0.0977571	0.0268108	0.101967	0.0279125	0.0845054	0	0.0703971	0	0	0.0919302	0.0656718	0.0729622	0.0995743	0.0373814	0.130376	0	0.403388	0.2831	0	0.370253	0.0900605	0	0.375284	0.571102
SNHG4	0.845816	0.436157	0.62994	0.626069	0.485275	0.829881	1.1082	1.10528	1.13098	0.589522	1.52631	0.957947	0.918335	0.579928	1.27972	0.557348	0.843941	0.362329	0.143505	0.1946	0.914072	0.854514	1.95606	0.653542	1.57816	0.869333	0.88033	0.98582	1.01579	1.65327	0.910371	0.770493	1.50249	0.628633	0.704321	0.799638	0.608908	0.508591	1.07399	2.68745	0.832126	1.19049	5.31175	9.39993	4.15372	1.24035	0.547584	1.74568	1.172
AC138207.5	2.1279	1.11497	1.33698	1.77699	1.26955	1.50833	2.35471	0.867466	3.25157	0.979796	1.21347	1.8725	1.19835	1.87971	0.860897	1.38136	1.39095	1.00366	0.750858	1.54119	0.787391	4.94371	0.556379	1.39361	1.30839	2.64518	1.52002	1.35765	2.76934	1.25219	1.4483	1.8595	2.2012	2.2202	1.61885	0.550021	1.36318	0.898117	2.31198	2.01589	1.10641	0.891032	1.407	1.76417	1.43122	3.98417	0	1.57156	1.34909
BCL2L1-AS1	0.0596675	0.128348	0	0.0883312	0.0396673	0.0749766	0.0695966	0	0.122616	0.178581	0.408316	0	0.113956	0	0.0672473	0.226594	0.108652	0	0.246338	0.0455518	0	0.0628646	0	0.0635012	0.1717	0.0688743	0	0.0478935	0.0786625	0.0595379	0.380122	0	0.0573141	0	0.0863586	0.185075	0.154216	0	0.158021	0	0.0504144	0.162403	0.227951	0.175388	0	0.0846023	0	0.0661012	0.804735
PABPC4-AS1	0.0405003	0	0.0930394	0.299781	0.0269248	0	0.0472398	0.0858545	0.249683	0	0.173219	0.379072	0.0773496	0.0526523	0.319516	0.0769022	0.294996	0.0372502	0.250808	0.061838	0.155859	0.256022	0.0917762	0.0862049	0.349631	0.140249	0.102572	0.227559	0.213574	0.282886	0.38702	0.134661	0.194514	0.219737	0.0293086	0.188434	0.104676	0.0634914	0.178766	0.789752	0.102659	0.0275584	0.464175	0.357142	0.0885315	0.11485	0.112592	0.224336	0.273113
AC004908.1	0.123747	0.266186	0.315864	0.183193	0.21938	0.414658	0.48113	0.568369	0.42383	0.0617277	0.952674	0.418252	0.196948	0.214502	0.464889	0.182755	0.600898	0.189694	0.113531	0.062981	0.396849	0.651886	0.140209	0.438992	0.712188	0.809433	0.208936	0.0662187	0.407853	0.864345	0.30658	0.171438	0.911304	0.186499	0.328354	0.895613	0.319833	0.161663	0.582624	0.973687	0.278817	0.336814	1.93042	0.727488	1.44269	0.584866	0.229346	0.776842	0.927205
AL117336.2	0.932452	0.458945	0.423575	0.280758	0.32571	0.834088	0.442422	0.6198	0.860656	0.496663	0.635391	0.567042	0.78478	0.277376	0.641231	0.29009	0.345346	0.973914	0.576358	0.410224	0.592997	0.815904	0.447669	0.571871	0.469944	1.13106	0.310204	0.367885	0.37504	0.898887	0.218148	0.262743	0.409885	0.400153	0.320236	0.588255	0.2587	0.210596	0.390651	0.389283	0.373895	0.333375	1.19246	2.0905	0.967326	0.145657	0.175745	0.560269	0.99471
AC008537.2	0.648172	0.398359	0.283622	0.376966	0.400129	0.290884	0.216009	0.736086	1.04656	0.415702	0.910875	0.902786	0.486323	0.752371	1.61756	0.55677	0.337226	1.32006	0.764566	0.388797	0.579054	1.02435	0.419657	0.739091	0.666137	0.855071	0.469022	0.557433	0.549332	1.06254	0.934005	0.423332	1.02285	0.502385	0.435556	0.825734	0.518531	0.508063	0.858298	1.09287	0.312946	0.315035	0.221093	0.408269	0.303615	0.295406	0	2.1029	0.624421
AC104695.4	0.150781	0.0810848	0.230922	0.0558039	0.250601	0.189468	0.879363	0.319634	0	0	0.773869	0.117606	0.215978	0	0.424839	0	0.549132	0.138682	0.0518751	0	0.65279	0.0794302	0.17084	0.240704	0	0.174047	0.0954682	0.0605141	0.0993912	0.526589	0.480289	0.125335	0	0.0681728	0.272788	2.22153	0.0649511	0.0590942	0.399324	0.154749	0.0636993	0.0512996	0.504033	0.221605	1.9776	1.3362	0	0.417599	1.35572
AP004608.1	0.76503	0.244227	0.968781	1.08052	0.60744	1.5218	1.04053	0.315181	1.33048	0.546128	1.48918	1.89555	1.10486	1.17733	0.810422	1.63915	1.69336	0.0895088	1.27044	0.726445	2.03642	0.421524	0.474751	0.972419	1.02683	1.43539	1.34874	2.03316	1.81758	1.0493	1.16821	0.662888	2.16042	2.51048	1.029	0.364747	1.53711	0.80308	1.65857	1.54535	0.285509	1.12758	2.36758	0.699258	3.78192	0.155236	0.263032	0.0988275	0.188373
TFAP2A-AS1	0.0395667	0.0992954	0.0201989	0.00976238	0.0175361	0.0497185	0.0307673	0.055917	0.108412	0.0394736	0.1241	0	0.11335	0.068585	0.0594574	0.00834774	0	0.0485221	0.0363003	0.0100688	0	0.166747	0	0.042109	0.0379525	0.030448	0.0167013	0.0635183	0.0347752	0	0.0140037	0.0438525	0.0506749	0	0.0286331	0.040909	0.0113626	0.031014	0.0349291	0.0270719	0.0334308	0.341027	0.138562	0.271375	0.9514	0.215056	0.879973	1.49032	0.622575
PLAC4	0.00445911	0.00239795	0.011951	0.00165031	0.0118578	0.0028016	0.00520114	0.0236316	0.0206177	0.00333647	0.0209788	0.00869504	0.0149035	0.0115941	0.0376918	0.00282233	0.0446591	0.00205064	0	0.0119147	0.00858009	0.0117451	0.00252616	0.00711843	0.00641579	0.00257358	0.00564663	0.00894803	0.00734833	0.0244719	0.00946917	0.00926647	0.00642486	0.0060483	0.0129076	0.0242045	0.00576247	0	0.0157458	0.020594	0.0113028	0.0242736	0.0532355	0.557057	0.71156	0.0158064	0.0867752	0.0592791	0.335782
AL109614.1	0.319556	0.343691	0.0815667	0.157689	0.177035	0.468469	0.062122	0.169352	0.164171	0.159402	0.683369	0.249247	0.203435	0.207719	0.2401	0.168548	0.290948	0	0.293175	0.0813192	0.35868	0.56113	0.0603445	0	0.459778	0.307387	0.23605	0.427498	0.351071	0.58458	0.791693	0.0885424	0.204634	0.240801	0.19271	0.90859	0.183537	0.0417468	0.658234	0.655928	0.225	0.253682	0.763009	0.313103	0.931377	0.528613	0	0.708025	0.718307
GK-AS1	0.068558	0.110604	0.104997	0.126866	0.319044	0.258445	0.2399	0.109	0.316993	0.153893	0.234578	0.213895	0.130936	0.20054	0.734039	0.108482	0.436943	0.0630564	0.707606	0.104678	0.131917	0.25281	0.310714	0.145926	0.131522	0.158273	0.151928	0.275149	0.158171	0.581478	0.65514	0.313435	0.197562	0.309971	0.124033	0.212651	0.0885969	0.0537385	0.363133	0.562895	0.231705	0.326552	4.71448	0.403043	1.34878	0.874874	0	0.113926	0.770534
AC019080.5	0.265311	0.412172	0.406325	0.458226	0.235174	0.481554	0.481384	0.249965	0.393764	0.397031	0.428678	0.206937	0.365954	0.26827	0.431911	0.317192	0.2684	0.189794	0.182557	0.112526	0.226891	0.745406	0.233805	0.627463	0.424145	0.986805	0.242643	0.378593	0.252614	0.264735	0.281702	0.29405	0.368112	0.373194	0.661322	0.34289	0.330161	0.43903	0.390356	0.45382	0.273983	0.521535	1.01358	0.779863	1.48211	0.417982	0.0819525	0.522523	0.530111
AC090589.3	0.505406	0.250883	0.565638	0.604315	0.491072	0.390819	1.04298	0.700522	0.519302	0.581789	1.62953	0.879383	0.631127	0.480154	1.0954	0.541352	0.849528	0.715152	0.56177	0.415521	1.27171	0.983053	0.176197	0.744757	1.19332	0.807774	0.590772	0.5305	0.435659	1.51293	0.9907	0.45243	0.634848	0.738261	0.647088	0.572798	0.703373	0.457105	1.20122	2.15462	0.229939	0.31745	1.63378	0.685664	2.1246	0.468555	0.10808	1.20594	0.524339
DLEU2	0.40232	0.343343	0.368353	0.424035	0.377939	0.318713	0.346851	0.259566	0.476287	0.209412	0.452624	0.245583	0.28814	0.335425	0.349928	0.340446	0.597233	0.120664	0.21665	0.183618	0.307128	0.345552	0.317107	0.432824	0.520134	0.297821	0.213199	0.319421	0.322851	0.493081	0.264662	0.4253	0.37385	0.181901	0.215194	0.498484	0.207212	0.236516	0.478699	0.412906	0.513589	0.553469	2.17603	1.01548	2.41849	0.461939	0.194515	0.736375	0.638941
AC037459.2	0.54369	0.366563	0.646246	0.618672	0.501711	0.713777	0.709885	0.73109	0.717058	0.340019	1.19392	1.15827	0.728408	0.722649	0.951146	0.585519	0.738832	0.522451	0.563949	0.452238	1.46774	0.966103	0.422938	0.647713	0.988531	0.814921	0.662792	0.964	1.02167	1.02834	0.809912	0.465427	0.974339	0.748463	0.610728	0.874665	0.678137	0.572462	1.28229	1.90718	0.52794	0.491431	1.17805	0.810995	1.17074	0.97225	0.496304	1.16867	1.6599
AC022150.2	1.52467	0.93172	1.40633	1.56459	0.898426	1.9594	1.73797	1.13857	1.88703	0.518551	2.81589	2.48653	1.75376	1.50913	2.38227	1.73265	1.51438	1.14735	1.71671	0.872982	2.53367	1.3143	1.7275	1.47512	2.72551	2.6399	1.38221	2.16949	2.01005	2.07458	1.36132	1.15215	2.03038	2.53806	1.70518	1.34352	1.73149	1.16794	2.66133	2.80951	0.761226	0.518731	2.91239	1.52784	1.96941	0.565023	0.288997	2.26489	1.94727
AC087752.4	0.0966045	0.207802	0.2959	0.214519	0.224781	0.728344	0.394381	0.307181	0.347412	0.433697	0.661083	0.226048	0.276751	0.313977	0.272191	0.244578	0.351825	0.355409	0.199416	0.442503	0.55765	0.254452	0.218912	0.771086	0.602311	0.557554	0.275246	0.348938	0.0955188	0.867552	0.41029	0.361356	0.463971	0.131033	0.209728	0.224734	0.416137	0.227167	0.426407	0.94189	0.367305	0.131469	0.32293	0.283962	0.950276	0.27395	0.134281	0.481595	0.760027
AL731571.1	0.185004	0.141495	0.437595	0.197801	0.235051	0.196309	0.254153	0.461903	0.342164	0.344529	0.819396	0.676604	0.372961	0.205774	0.898894	0.202966	0.464152	0.306285	0.27157	0.153792	1.13518	0.337857	0.116453	0.17939	0.583635	0.427102	0.288937	0.455394	0.35772	0.656365	0.523823	0.228966	0.493632	0.178445	0.184459	0.551526	0.251476	0.21591	0.802081	1.36286	0.194525	0.218203	0.797092	0.567976	1.00653	0.317695	0.182868	0.592086	1.21061
AC064807.1	1.66146	1.43656	1.14753	1.14942	0.505347	1.4737	0.848638	0.897775	1.41704	1.18628	1.3469	0.838524	1.10956	1.01646	0.83223	0.893512	0.771189	0.928863	0.582819	0.596895	0.888034	1.17843	1.71023	0.624073	1.52076	1.37883	0.687557	1.08955	1.00213	1.0944	0.749453	0.776286	1.27257	1.15871	0.958728	0.816807	0.963616	0.851187	1.36126	1.22594	0.77989	0.790638	1.26532	1.56407	1.40052	0.515806	1.56982	0.974438	4.66224
AC091729.3	0.780267	1.87022	0.845022	0.445539	0.674343	0.616291	0.455055	1.12239	1.22549	0.917437	1.29674	1.07808	0.606723	0.818754	0.364318	0.56441	0.568332	1.42505	1.31154	0.476542	0.975888	0.892539	3.37209	0.972755	0.705666	0.720531	0.430513	1.15418	0.793541	1.03439	1.19536	0.472543	1.18848	1.72359	0.637251	1.46941	0.854682	1.59017	0.787212	1.13256	0.951226	0.819153	3.21511	3.70242	3.72801	0.553169	1.95225	1.08668	2.43042
AC005670.3	0.686532	1.09682	0.515505	0.735117	0.296888	0.519282	1.27502	1.51186	0.452009	1.1371	0.866634	0.842212	0.521925	0.70189	0.758721	0.632812	0.327708	1.67975	0.536601	0.361285	0.795168	1.76265	1.09505	1.17045	1.17639	0.846323	1.25341	0.749015	0.733737	1.07744	0.877564	0.493105	1.31891	0.566559	0.501644	1.17844	0.689087	0.757564	1.01207	0.560941	0.540645	1.36971	2.17717	0.979617	0.772218	0.8931	0.370598	1.04854	0.704183
GK-IT1	0	0.0604562	0	0	0	0.0706328	0	0	0.173268	0	0.0480825	0	0	0.109615	0.190054	0.0711555	0.204714	0	0.812231	0.0429128	0.0540794	0	0	0.0598223	0	0	0	0.0451188	0.0741053	0.168266	0.0596832	0	0	0	0.0813555	0.0871764	0.048427	0	0	0.115379	0	0.0764971	0.590547	0.330454	0	0.278953	0.468801	0.124543	0
PCAT14	0.013632	0.00977443	0.0139183	0.0100904	0.0120835	0	0	0	0.0140068	0	0.0388694	0.00708846	0.0086784	0.00590744	0	0.00575214	0.00827443	0.0125381	0.00312666	0	0.00437172	0	0	0.0145079	0.0435862	0.0209807	0.00575414	0	0.00299529	0.00906829	0.00482473	0.00377716	0.00436479	0	0.00328834	0.0140945	0.00782958	0.00712356	0.0040114	0.0186543	0.00383934	0.510175	0	0.0133568	0.00993298	0.161073	0.0126325	0	0.0204283
AL050341.2	5.4884	5.71603	2.87206	1.87582	1.8388	4.4946	3.09106	3.26935	2.82709	5.07097	3.09681	3.87421	2.7104	2.27799	2.2686	2.07145	3.71813	4.24882	3.49748	1.95681	3.73383	2.70052	5.98883	3.77587	4.33382	4.26252	2.24638	3.10354	3.51281	2.45647	2.44477	1.69727	3.53316	2.22612	2.29503	2.66137	2.84453	2.8491	3.56671	4.20603	2.33699	1.89193	5.75364	5.70393	6.96417	1.55024	1.81162	3.09625	3.45045
AL121832.2	1.26945	0.898245	1.12557	1.01383	0.999401	1.17538	1.20794	0.849805	1.75058	0.999841	1.74314	1.25071	1.37174	0.738315	1.46837	0.972636	1.15581	0.614517	0.919464	0.867121	1.1249	1.12629	2.11964	1.06659	1.44197	1.1954	0.846065	1.66251	0.682645	1.13336	0.744879	0.721992	1.18729	1.35937	1.01536	1.11391	0.77708	1.20453	1.2976	1.37143	1.07259	1.11385	1.46769	3.43687	2.33681	1.08944	4.17921	3.21976	2.47805
CHROMR	0.803162	1.04979	0.43137	0.408717	0.374504	0.58171	0.94332	0.975438	0.647587	1.05167	0.992368	0.600347	0.479351	0.431437	0.754326	0.455397	0.802355	1.28761	0.425996	0.361932	0.600997	1.21053	0.720423	1.25841	0.829244	0.888463	0.363738	0.452169	0.514718	0.957249	0.456	0.384809	0.701836	0.232002	0.419771	0.895285	0.490129	0.415329	0.950287	0.675464	0.796424	0.296027	0.404853	0.868919	0.780299	1.41164	0.124045	0.834154	0.413731
CHN2-AS1	0.0559289	0	0.0214138	0	0	0	0.0652359	0.0592805	0	0	0.095683	0	0.080112	0.0545328	0.0630338	0	0	0.0257204	0.0962095	0.0213488	0.0538084	0.0589257	0.0633693	0	0	0	0.0354117	0	0.0368669	0.111615	0.029692	0.0232451	0	0.0252871	0	0.0433697	0.0963686	0	0.0493734	0.0287003	0.0236278	0	2.02985	0.164399	0.489031	0.0396507	0	0.123919	0.440016
AL157394.1	0.601647	1.05887	1.3961	0.539802	0.412099	1.09966	0.637969	0.483107	0.674388	0.572948	0.857747	0.839001	0.835678	0.639958	0.452051	0.600055	0.896377	0.620441	0.250899	0.570663	1.12259	0.653093	0.619714	0.659707	0.682029	1.95718	0.611807	0.848779	0.480716	0.855031	0.464593	1.04569	0.647967	0.494587	0.620103	0.735159	0.565457	0.9289	0.724264	1.01042	0.878051	0.347362	0.261193	0.750271	0.956487	0.620417	0.304108	0.242371	0.245891
HCG18	1.14641	1.07262	1.05957	0.760741	0.734423	1.13229	0.908906	1.63657	1.21417	1.14691	1.47438	1.01548	0.959997	0.929667	1.55225	1.01381	1.1737	1.20483	1.09332	0.802979	1.47624	1.25682	1.41881	1.18935	1.67483	1.34181	1.03548	1.32044	1.14779	1.4223	1.04358	0.694378	1.25828	0.872815	0.96305	1.38008	1.03739	0.960181	1.49328	1.48758	1.05668	1.007	3.79163	1.65897	2.69174	1.214	0.592834	2.02137	1.65788
AC090948.1	0.406478	0.0874358	0.435765	0.391135	0.243206	0.255385	0.331883	0.990923	0.584715	0.121656	0.625861	0.28534	0.465788	0.184954	0.824606	0.746096	0.66616	0.336473	0.335629	0.310316	0.664813	0.256955	0.276332	0.778671	0.506863	0.281519	0.36031	0.554657	0.294734	0.608393	0.992655	0.50682	0.585668	0.367562	0.470647	0.630401	0.350192	0.446059	0.717668	0.500608	0.652541	0.193612	0.3494	0	0.44427	0.20172	0	0.315215	1.1878
AC008610.1	0.851742	0.183215	0.434815	0.924669	0.566242	0.499462	0.331159	0.481484	1.16688	0.509843	1.02001	0.841498	0.759128	0.516743	0.639962	0.682858	1.34418	1.09675	0.742356	0.736942	0.655558	2.03406	0.707704	0.966899	1.08932	0.786534	0.575238	1.27618	0.561446	1.13319	0.84407	0.519201	1.19995	0.462118	0.739652	0.440318	0.587039	0.623121	0.802035	1.86486	0.527748	0.618206	4.664	1.16836	1.48949	0.483073	1.42072	1.00649	2.04221
AL118506.1	0.651657	0.599638	0.870491	0.94327	0.659465	1.08271	0.878335	0.790477	0.721652	0.769313	1.01575	1.07303	0.864285	0.823654	0.856847	0.838663	0.883386	0.546087	1.06618	0.641213	1.34446	1.00697	0.918834	0.793704	1.43766	1.00295	0.861877	1.24955	1.2123	0.787515	0.837986	0.619926	1.30059	1.03449	0.838368	0.875894	0.929463	0.891054	1.07385	1.28559	0.728016	1.21202	2.08155	1.06417	1.50363	1.05231	0.865554	1.10695	1.23696
AC138028.4	0.350761	0.806542	0.444572	0.420782	0.313597	0.30397	0.846476	0.67946	0.534393	0.579203	1.24155	0.830192	0.554401	0.369522	0.504373	0.428707	0.396446	1.32383	0.257998	0.295482	0.826199	1.46548	0.246676	0.566383	0.846927	0.809768	0.352275	0.572801	0.510262	1.32758	0.423799	0.311674	0.673852	0.229681	0.45515	1.10674	0.385553	0.350786	0.672683	1.60133	0.572292	0.378588	1.02812	1.45767	1.42773	0.900361	0.0672499	0.978155	0.489383
AC137630.3	0.17122	0.0613839	0.524447	0.168982	0.15177	0.4303	0.133141	0.18148	0.469139	0.170817	0.390563	0.267095	0.599508	0.333891	0.385941	0.144495	0	0.31496	0.31417	0.130714	0.164728	0.180394	0	0.182221	0.10949	0.395279	0.361363	0.458112	0.150485	0.341696	0.121198	0.0474415	0.164466	0.258045	0.123906	0.177028	0.0491702	0.35789	0.100767	0.4686	0.19289	0.233013	0.0545099	2.01315	0.124759	0.121386	3.01464	0.316136	1.02633
AC011374.2	0.763653	0.730072	0.747204	0.973491	0.846134	1.11952	1.28661	0.314773	1.48211	0.698368	1.37904	1.22436	1.21539	0.799745	1.24318	1.42318	1.08156	1.01454	0.904955	0.939268	0.653066	0.938666	0.384553	1.39968	1.01736	1.22429	1.15506	1.08971	0.811002	0.888994	0.450461	0.705309	1.58932	0.690541	0.859646	0.723763	0.80411	1.39669	1.04867	0.827288	0.931996	0.375287	1.49923	1.49647	2.133	0.721854	0.353829	1.08099	0.762917
AC015849.3	0.685932	0.19673	1.05051	0.406179	0.486412	0.804462	1.65349	0.920912	0.46986	0.958045	2.26875	1.3197	0.698682	0.326973	1.59767	0.781471	0.8327	1.26177	0.471979	0.279285	1.45183	1.34901	0.103624	0.389335	1.88611	1.10848	0.376395	0.991042	0.693294	2.55525	1.2624	1.02631	1.18598	0.868364	0.595662	0.744662	0.630345	0.537661	1.73586	2.25273	0.231824	0.435626	3.05725	1.613	1.79929	1.45887	0	1.92506	1.95302
HEIH	17.7904	15.2404	12.3921	13.3283	11.6116	19.8937	15.5513	11.311	16.3363	16.7984	12.6642	16.31	14.8472	13.092	8.16021	15.2102	8.92904	16.3255	12.5666	11.3232	11.2806	19.3129	16.4073	13.988	15.9891	22.4378	12.7694	16.3183	15.3599	11.7941	10.3125	8.84813	16.7773	16.5391	11.799	8.81986	14.5588	12.2083	14.2384	13.6557	15.762	9.59613	11.0437	10.7605	9.65578	10.0076	17.3121	8.76938	3.76517
TNFRSF14-AS1	2.24356	1.13416	3.0462	1.83563	3.15712	2.16581	2.06554	1.50312	3.87072	1.30597	4.22087	1.86338	3.21887	3.05383	3.23346	2.86538	2.5956	0.404678	5.44194	2.70661	4.59687	2.42508	2.57499	1.606	2.71009	3.17738	2.12964	3.61337	2.50957	2.4056	2.66015	2.42714	2.76282	3.41306	3.1314	2.41085	2.20544	3.45734	4.22762	5.19857	2.18137	2.6747	2.06292	2.38353	1.27178	0.523316	0.990668	1.64356	1.52848
AL121603.2	1.52847	0.63489	0.952485	1.13137	1.15629	2.19879	1.68446	1.07259	1.32138	1.16732	1.21728	1.6526	1.46964	1.08947	1.17614	1.58123	1.80433	0.92105	1.23304	1.34392	1.16627	1.04396	1.30184	1.7613	1.44589	1.87382	1.74864	1.62453	1.61204	1.2096	0.996121	1.26176	1.36693	1.30588	1.57905	1.12802	1.19876	1.42943	1.9914	1.25495	1.03315	0.903764	0.88596	1.33235	0.783443	0.657636	0.234438	1.12107	0.710843
AL596202.1	0.317969	0.341985	0.392896	0.593747	0.350711	0.38139	0.632184	0.337023	0.378688	0.270359	0.488346	0.343831	0.386447	0.413375	0.431663	0.320177	0.579007	0.445326	0.318239	0.275848	0.590969	0.479668	0.253826	0.538362	0.554539	0.50884	0.448404	0.516251	0.571628	0.627346	0.253209	0.402469	0.534498	0.424755	0.392222	0.414681	0.473167	0.356862	0.631574	0.763921	0.293083	0.324543	0.745416	0.403597	1.18477	0.271533	0.341531	0.536388	0.974646
PXN-AS1	1.50959	1.35132	0.919031	0.66627	0.548542	1.75552	0.842119	0.745365	0.934509	1.16461	1.12287	0.804466	0.725249	0.591199	0.73972	0.830845	0.768323	0.62092	0.787107	0.515386	0.956206	0.958236	1.66792	0.758386	0.863403	1.24466	0.694591	0.933239	0.846746	0.729765	0.756623	0.568959	1.17084	0.856341	0.62425	0.974288	0.735094	0.668808	1.01811	1.27986	1.14081	1.28878	0.913431	0.440976	1.35275	0.711264	2.26778	1.52694	1.83364
LINC01186	0	0.0383404	0.10919	0.0263865	0.023699	0.0895886	0.12474	0.188921	0.0732562	0.160038	0.0914797	0.139023	0.340412	0.11586	0.120529	0.0676887	0.19474	0.0327873	0.0981153	0.544293	0.205778	0.0751161	0.201952	0.0379384	0.136774	0	0.090283	0.114455	0.305477	0.0355706	0.0757005	0	0.136968	0.12894	0.0773917	0.110572	0.122847	0.111769	0	0.219516	0.0602396	0.29108	2.65566	1.15263	0.701322	0.379089	1.28833	0	0.480784
AC083843.3	0.339035	0.318582	0.49737	0.449072	0.510098	0.713027	0.466218	0.412309	0.370358	0.432588	0.760131	0.796104	0.337385	0.366529	0.88085	0.32301	0.838319	0.377476	0.415001	0.36236	0.611159	0.428641	0.226439	0.395001	0.657252	0.502575	0.438363	0.581508	0.477548	1.06475	0.894265	0.471676	0.370227	0.377572	0.317661	0.982425	0.328983	0.268547	0.866384	1.81303	0.38898	0.407968	0.586263	0.461568	1.88009	0.225178	0.138899	0.672112	1.07495
AC026401.3	4.95903	4.21788	3.83613	3.95157	2.85946	3.56079	4.60379	5.33665	4.1075	4.27846	5.17258	3.31538	3.23754	2.87812	4.53393	2.81847	4.00829	7.00452	3.93451	2.64624	3.26181	6.50427	3.38271	6.16624	4.2228	2.71609	2.88353	3.04629	3.50236	4.39284	1.96109	4.01698	3.15942	2.10485	3.35066	5.55236	3.46583	3.88709	3.17165	2.10332	4.48928	10.0887	14.7406	8.99888	9.78936	6.99552	8.29988	21.4705	19.3936
AL157838.1	0.214059	0.134299	0.116107	0.303687	0.34391	0.403471	0.572183	0.0567216	0.265766	0.106778	0.488282	0.500884	0.281064	0.226108	0.623233	0.186293	0.308585	0.0492203	0.0797824	0.0612819	0.145876	0.112764	0.0404226	0.123398	0.205326	0.247089	0.214593	0.171819	0.352755	0.774278	0.710259	0.400352	0.325559	0.137108	0.264633	0.24207	0.20747	0.0559293	0.480296	0.320383	0.135647	0.151725	0.511112	0.262171	0.955341	0.322483	0.0495908	0.59285	0.441071
LINC01315	2.64195	2.72783	0.876665	0.677927	0.608878	1.19513	1.04774	1.68016	1.12203	1.26515	1.0245	0.659412	0.521392	1.01895	1.15132	1.01446	0.513159	1.83055	0.521126	0.537849	0.847259	1.89278	0.65855	1.18091	1.06435	1.5858	0.724865	0.862385	0.626941	0.755713	0.336619	0.292812	1.30271	0.461875	0.535328	1.40676	1.01666	1.06304	1.22833	0.921897	0.863133	2.16924	5.58488	7.61049	8.27773	1.26116	3.18269	1.91219	0.316728
AC092279.1	1.29351	0.295769	0.343168	0.316638	0.947959	2.23972	0.867242	0.313069	0.900004	0.198143	0.496604	1.04863	0.340412	1.02619	0.401765	0.35456	0.408027	0.637011	0.189222	0.287698	0.499747	1.13747	0.450063	0.466101	0.615485	0.493783	0.296644	1.23448	0.510247	1.35168	0.42176	0.634971	1.11531	1.98015	0.508574	1.1768	0.307117	0.399176	0.539479	0.637641	0.19793	0.325732	1.17705	0.868215	0.756983	0.382699	0.509669	0.361068	1.37367
AC127502.2	0.237299	0.479818	0.305277	0.112415	0.309206	0.524804	0.87465	0.533222	0.195059	0.53977	0.966211	0.562669	0.389758	0.265311	0.545587	0.300391	0.656809	0.349211	0.189407	0.166668	0.684906	0.830048	0.258113	0.393972	0.764797	0.71218	0.306505	0.449518	0.206477	0.852423	0.352743	0.134132	0.674702	0.394828	0.309106	0.618281	0.351637	0.148804	0.70387	0.818305	0.505259	0.303564	0.308233	0.390614	0.41498	0.477782	0.105552	1.45113	0.9388
AC011476.3	0.909517	0.209617	0.634279	0.721307	0.712625	0.734705	0.985091	0.946805	0.734268	0.46179	1.22257	1.31746	0.589354	0.73901	1.66572	0.585945	0.828094	0.597522	0.413491	0.483565	1.9532	0.63313	0.920099	0.674111	1.10609	1.08735	0.740399	1.08203	1.00635	1.3289	1.00019	0.769526	1.31046	0.660889	0.658186	0.906787	0.783573	0.458303	0.903275	2.30028	0.727303	0.928321	1.0393	0.572883	1.56212	0.7254	0.31606	1.00759	1.42381
PCCA-AS1	0	0	0.0202707	0.0195942	0	0	0.0617536	0.112232	0	0.0792282	0.158507	0.0412947	0	0.0516218	0.238676	0.0167549	0	0.0243474	0.0364295	0	0.025468	0	0	0	0	0.0305563	0.0167607	0.0424962	0	0.158485	0.0562141	0.0220043	0.10171	0	0.0383133	0.0615819	0.0684183	0.0414992	0.0701067	0.108673	0	0	0.0758483	0.0778116	0.173597	0.0187671	0	0	0.119008
AC008764.2	2.374	1.21282	2.18148	2.1526	1.97281	2.6848	3.32287	3.01952	2.37829	2.13158	3.8076	3.28672	2.60705	1.58174	2.07358	2.0285	3.13414	3.71194	1.42933	1.99362	3.93989	3.37663	2.01737	2.33705	3.01722	4.38451	2.17952	2.76305	3.32538	3.43483	2.6467	1.8747	3.30653	2.41506	2.06158	2.39318	2.30093	2.41909	4.34867	6.57846	2.00585	1.65578	2.5508	1.04673	2.59473	2.01966	0.824974	1.64374	3.60204
U62317.2	2.16631	3.81772	2.11854	1.62281	1.82191	2.19738	2.1006	1.71518	2.5745	1.24986	3.52751	1.79147	2.71669	1.69657	2.94158	1.71805	1.90109	0.600142	1.38285	1.31509	2.73705	3.60232	1.89263	1.55552	2.70382	1.68714	1.80128	2.30449	2.2538	2.396	1.74589	2.16955	1.6296	2.40734	1.68101	2.26679	1.23673	1.61621	2.71883	2.6519	2.33758	1.63391	2.44294	1.76455	3.13795	6.27274	5.73217	2.83362	4.63483
NFYC-AS1	0.26456	0.398359	0.192458	0.362279	0.272615	0.182841	0.61717	0.392579	0.557259	0.395906	0.961793	0.546831	0.366321	0.240759	0.551611	0.376761	0.578102	0.45016	0.145632	0.0908876	0.572691	0.710776	0.164865	0.366026	1.12926	0.473343	0.226136	0.61583	0.340063	0.633565	0.393265	0.230908	0.648019	0.263154	0.268034	0.369272	0.341889	0.331796	0.840782	0.977476	0.279416	0.252028	1.415	0.85542	1.12771	0.375119	0.0367742	0.571519	0.654155
AL031275.1	0.213547	0	0.163524	0.0790332	0.0709835	0.134169	0	0.0565859	0.109709	0	0.0913338	0.0416405	0.0509804	0.0694054	0.120337	0	0	0.0491026	0.0367345	0.0407569	0.102725	0.0562472	0.5444	0.113634	0.0512086	0.123249	0.0676043	0.0857042	0.246338	0	0.11337	0.0443771	0.102562	0.144826	0.115902	0.0827967	0.0919882	0.0836933	0.0471292	0.0547914	0	0.036327	1.27472	1.72619	0.233401	0.0378484	0	0.17743	0
AC026471.4	1.34192	0.801819	2.20739	1.21401	1.32165	1.81113	2.4348	1.79109	1.88949	1.33876	2.42329	3.14001	1.66112	1.22765	2.07253	1.85599	1.90056	1.8285	1.64152	1.17623	2.82116	1.98982	1.01363	2.11577	2.38365	2.35216	2.07691	2.79254	1.90016	2.82679	1.84699	0.950204	3.48505	1.93252	1.7264	2.08117	1.75556	1.98683	3.15902	4.53975	0.923852	1.99531	2.61077	1.31482	6.5186	0.916117	2.21071	3.74407	2.3461
AC022400.1	1.35398	0.916897	0.806411	0.556785	0.666767	0.693154	1.05286	1.48827	0.566789	1.27575	0.857922	1.72102	0.718308	0.488957	0.339108	0.571323	1.0958	4.38171	1.31122	0.689112	1.01317	1.6907	0.397731	1.44098	0.721524	0.636739	0.635024	0.724537	0.694175	1.50116	0.532455	0.833691	1.01156	0.589503	0.653221	1.36103	0.691255	0.550307	0.442696	1.95575	0.423708	0.409474	1.0537	1.03183	1.97316	0.497728	0.278823	0.555547	0.901785
LINC02441	11.6025	7.69601	7.46062	15.3509	19.297	15.189	10.7983	12.7691	10.1769	10.1031	9.16399	16.8381	17.0633	14.8999	12.3019	16.1458	19.5817	2.08223	4.00566	27.4063	14.1963	3.0667	45.8507	15.2737	13.3783	10.1263	20.1189	27.1928	21.1588	4.15493	21.2905	13.3409	12.1934	24.0176	18.4602	10.3451	20.3749	17.6186	12.4552	20.2889	11.477	8.58264	6.10057	1.78248	4.86041	0.200624	0.449551	1.47794	2.81706
ERVK13-1	0.428094	0.41492	0.550803	0.83824	0.455028	0.566079	0.72287	0.667431	1.24287	0.379908	1.48605	0.79011	0.677369	0.606697	1.18656	0.545063	1.25089	0.533381	0.489799	0.305918	1.43673	0.723749	0.434284	1.16019	0.928689	0.520007	0.434941	0.811102	0.746487	1.02321	1.52218	0.370331	1.03041	0.594166	0.641208	1.14643	0.458874	0.370674	0.938199	2.12271	0.483677	0.392912	0.774946	0.431643	2.21434	0.517003	0.145304	0.849245	0.660171
AL731566.2	0.311059	0.346944	0.388168	0.162024	0.206794	0.188196	0.430011	0.366333	0.414311	0.258606	0.660272	0.44031	0.209028	0.157264	0.662197	0.204173	0.48251	0.296694	0.190253	0.140724	0.399021	0.473383	0.43076	0.147131	0.419927	0.545234	0.233421	0.240432	0.425273	0.643759	0.330276	0.201106	0.387321	0.270861	0.266789	0.294811	0.188583	0.198669	0.579711	0.815846	0.214151	0.227339	0.594178	0.541829	1.05772	0.228693	0.0960837	0.382889	0.751003
LINC00653	0.609004	0.389882	0.188759	0.214658	0.192795	0.327968	0.287521	0.276642	0.536355	0.477377	0.508538	0.48632	0.290777	0.197934	0.228789	0.339572	0.343252	0.49345	0.528796	0.132837	0.404559	0.427757	0.476443	0.570975	0.6537	0.5356	0.201978	0.279332	0.296301	0.52087	0.369501	0.0843713	0.487486	0.288461	0.283317	0.2811	0.199876	0.215949	0.332813	0.654791	0.245029	0.147999	2.36815	1.27866	2.50402	0.0719587	0	0.22489	0.619281
AC019131.2	0.897756	0.717275	0.530324	0.702487	0.716199	0.773551	0.927475	1.03312	1.02786	1.03639	0.877644	0.920302	0.808303	0.900355	1.0118	0.876685	1.35452	1.76939	1.04132	0.528715	0.51823	0.486442	0.959061	1.69249	0.664299	1.0955	0.617141	0.905903	0.693225	0.998184	0.735339	0.533035	1.05945	1.04375	0.723924	0.616598	1.06072	1.0857	0.951034	1.39523	0.6285	0.593424	1.3229	0.829364	0.50463	0.327323	0.641773	0.198911	0.980173
AL596325.2	0.397704	0.47527	0.541409	0.719593	0.470037	1.38818	0.876228	0.843074	0.63566	0.264512	2.34357	1.27527	0.421976	0.488311	2.04192	0.419536	1.207	0.325146	0.486496	0.101206	1.27542	0.744914	0.100136	1.08166	1.01728	0.765119	0.727449	1.20597	0.844727	1.85192	1.59526	0.624443	0.466911	0.439545	0.639567	3.2553	0.837548	0.381012	1.59941	2.94789	0.373366	0.360824	1.05512	0.90924	0.965958	0.407264	0.122848	0.930129	0.993303
AL035661.1	13.1475	7.28006	7.34913	10.266	4.97977	17.1336	9.64716	2.85324	10.1017	7.29779	6.84125	12.2023	7.0598	8.44476	6.50747	10.6427	11.8639	1.0406	1.78516	5.83764	7.99477	2.58954	19.8694	6.4356	8.40117	18.8914	9.94238	9.75462	10.1452	5.13858	6.19281	4.24825	10.343	17.5685	13.467	4.00848	10.9404	5.90198	7.28417	7.16714	3.69189	9.86208	22.6734	12.0411	21.1071	3.07009	4.2841	4.64615	5.39327
AP000240.1	0.0493709	0.159299	0.264641	0.146176	0.262576	0.0620381	0.575866	0.209318	0.355098	0.147764	0.71794	0.308066	0.235728	0.224646	0.778997	0.156243	0.359608	0.272454	0.373685	0.301529	0.284994	0.41613	0	0.472888	0.28414	0.284945	0.281335	0.198144	0.16272	0.344846	0.262105	0.246234	0.426812	0.133932	0.321552	0.497696	0.0850687	0.116097	0.305088	0.30402	0.208573	0.167972	0.660149	0.435366	1.72676	0.350014	0	0.273472	0.110977
SNHG21	0.996045	1.07127	0.616669	0.564716	0.281777	0.772266	0.346066	0.606485	0.500827	0.665991	0.743247	0.644656	0.627354	0.330615	0.716538	0.549952	0.656038	0.42882	0.656198	0.339757	0.75439	0.736823	1.10454	0.969826	0.93508	0.68495	0.322035	0.884552	0.586719	0.570953	0.382528	0.246624	0.427488	0.459923	0.444751	0.78881	0.712057	0.365453	0.823171	0.761252	0.662521	0.331669	1.63949	1.37046	0.833861	0.34556	1.11939	0.586939	0.666918
AC002550.2	0.283193	0.121833	0.433711	0.33539	0.414191	0.355853	0.52851	0.600328	0.581959	0.0847581	1.25967	0.5743	0.432686	0.331349	0.766005	0.681124	0.928228	0.573029	0.194861	0.302677	1.14431	0.596735	0.513387	0.361667	0.651935	0.261513	0.466195	0.591011	0.522687	0.904251	0.902065	0.564963	0.489642	0.512161	0.49185	0.834482	0.487958	0.31077	0.75	0.232516	0.669974	0.346858	0.595044	0.166485	0.619046	0.401539	0	0.188238	0.891199
ZNNT1	0.663545	0.450286	0.67748	0.859518	1.08706	1.06209	1.30837	0.89588	0.730487	1.32397	1.10816	1.17065	0.64118	0.826698	0.436239	1.13995	1.13636	1.62746	2.33179	0.9468	0.737184	1.22342	0.170054	1.65616	1.11383	1.32214	0.95529	0.932067	0.807091	1.53703	1.00648	0.499034	1.26716	0.571445	0.82889	0.9372	1.09569	0.922581	1.2343	1.25661	0.493901	0.424633	1.29766	1.71825	1.36414	0.655226	0.439207	1.50519	1.89993
ZNF236-DT	1.55089	1.13055	1.04245	0.752555	0.801922	1.2559	1.00499	0.87671	1.02694	0.773622	0.928643	0.927409	1.23416	0.750489	0.95164	1.1234	0.564821	0.491329	0.652145	0.67093	1.02788	1.14379	1.36672	0.495163	0.975218	1.19347	0.894673	1.2172	0.817847	0.808152	0.457418	0.458369	1.29109	1.35566	0.835511	0.547865	1.05406	1.21565	1.36911	1.04345	0.90271	1.23119	0.394997	1.11436	0.452023	0.635269	2.10786	0.80179	2.16916
MAGI2-AS3	0.934857	1.81892	0.370429	0.399272	0.362434	0.593389	1.15984	1.6379	0.317557	1.91894	1.11659	0.7666	0.438111	0.515343	0.86972	0.47142	0.552296	2.37294	0.665715	0.369305	0.522656	1.7454	0.848248	1.60781	0.627886	0.997123	0.454568	0.355932	0.454267	0.951982	0.560509	0.284029	0.508919	0.197886	0.443144	1.39032	0.52095	0.547703	1.19132	0.866859	0.627689	0.180257	0.232843	0.473978	0.402836	1.42216	0.0533661	0.442335	0.23301
AC005332.3	1.75123	1.23773	2.9119	2.22214	2.36171	2.01193	2.91806	2.28044	1.79937	2.62066	3.25279	2.73184	2.00675	2.08154	2.98874	2.31184	3.73557	2.20895	3.09855	1.60432	3.17711	2.58309	1.02044	3.67424	2.78364	3.29207	1.77408	2.00809	2.27575	3.395	1.75316	1.28932	2.35502	2.35272	2.28115	2.28916	2.19843	2.51005	4.10785	2.87569	1.90241	0.919252	4.53985	1.91197	3.28122	1.45436	0.695494	2.71608	0.224941
AC092953.2	0.351176	0.206018	0.66006	0.472616	0.573047	0.842441	0.930942	0.541411	0.557648	0.907724	0.983112	0.57272	0.518264	0.435794	0.827555	0.848674	0.98828	0.557901	0.680982	0.365587	0.583578	0.437264	0.217033	0.951337	0.857433	0.810727	0.444699	0.410007	0.526105	0.82825	0.779639	0.557285	0.797313	0.490766	0.508268	0.841707	0.770122	0.425411	1.12732	1.17954	0.593433	0.304128	1.95144	0.563049	1.32595	0.339499	0	0.813452	0.358811
DTNB-AS1	3.50366	2.37692	1.15573	1.31665	0.716693	2.98023	1.69755	0.342796	4.76307	1.20995	0.414973	1.55558	3.96342	1.61175	2.0655	3.34345	1.96308	0.0991539	0.111268	1.39912	1.24461	0.511116	5.74089	0.573658	2.43006	1.11996	1.94534	2.59597	2.80696	1.18328	1.14465	2.2851	4.50455	3.07074	1.75533	0.835967	0.789454	2.45056	0.808937	3.31925	2.36826	1.54047	0.0514816	0	0.589141	0.496783	0	0.238859	0.605819
AL080317.1	0.0805619	0.0693173	0.197409	0.190821	0.128539	0.141725	0.169142	0.0512337	0.231775	0.0482234	0.22052	0.150808	0.246178	0.094261	0.290547	0.142773	0.381418	0.0444582	0.243907	0.0738038	0.0930088	0.0339514	0	0.188624	0.15455	0.0557957	0.193831	0.245726	0.223038	0.160774	0.171078	0.120539	0.185722	0.145698	0.1749	0.162425	0.0277625	0.126295	0.170686	0.214972	0.0816823	0.296019	0.615549	0.378889	0.387429	0.0456914	0.223964	0.303445	0.615704
AP002387.2	5.9399	1.90597	2.13603	1.919	2.24715	4.61856	2.48808	3.44359	5.96833	2.20994	3.56511	3.27637	4.13661	1.62123	0.18493	3.90497	2.1513	1.90157	1.08388	0.50107	4.60964	2.76604	2.63998	1.60658	3.39965	6.25035	3.15831	3.45073	3.30973	2.06299	2.02098	2.42782	5.32734	3.9468	1.85239	4.12255	2.57283	0.951765	3.09985	3.40174	2.07959	0.647582	12.3806	20.0644	4.37593	2.2335	19.8887	3.59921	15.2698
AC073896.2	2.67323	2.54178	1.75036	2.40887	1.41659	2.8236	2.34985	1.84788	1.31365	1.73931	2.08783	1.54113	2.10878	1.9895	1.74656	2.20693	1.7637	1.92421	1.59948	1.36054	2.19914	1.26537	4.30185	1.97912	2.22971	2.99627	1.7171	2.55	1.94089	1.66231	1.11067	1.25596	2.79108	3.08292	2.18685	1.56221	2.43657	2.27759	2.05208	2.26642	1.83312	1.08085	1.25808	0.797163	0.84689	1.07119	0.107705	1.073	1.04504
LINC02362	1.242	1.81288	0.623748	1.34316	0.439651	2.33086	1.32638	0.461603	5.36147	0.808618	0.710568	0.937279	2.84952	1.24769	1.19981	0.990288	3.12809	0.0815951	0.216424	0.689582	1.41992	0.620285	2.23876	0.369074	1.17586	0.847152	1.29191	2.66708	0.988811	1.46463	2.47475	2.4268	3.52481	2.16596	0.747047	0.419011	0.708711	0.644804	1.38833	2.061	2.04427	0.949385	0.277297	0.0711187	1.8511	1.18355	0.0224207	0.178691	1.32339
AC124248.1	3.71927	2.8061	2.50797	2.09556	2.36188	7.67298	1.29498	1.05909	2.79485	1.7445	2.23177	2.81436	3.02154	2.52587	0.938451	3.12704	1.51626	0.459512	3.47589	1.52564	3.68507	1.40366	5.1575	2.00866	2.23636	5.38248	2.42518	3.11903	2.59802	1.44017	1.35564	1.56887	2.87939	3.2126	3.53512	1.29138	2.86948	3.48097	3.18532	3.53227	2.01683	1.85087	2.43885	1.30538	3.76171	0.236129	1.85188	0.368983	0.623903
Z95115.1	1.12017	0.897679	0.521393	0.707215	0.386951	0.910788	0.6661	0.884656	0.778599	0.838154	0.685768	0.668133	0.47192	0.449734	0.717878	0.417058	0.559941	0.818166	0.574303	0.318594	0.792429	0.84465	0.895902	0.888267	1.05341	0.747924	0.570178	0.458382	0.615325	0.515038	0.443101	0.36515	0.748975	0.685217	0.429158	0.6387	0.425762	0.800564	0.736811	1.02567	0.723764	0.470785	2.10826	1.93687	2.6647	0.661788	0.671672	1.10713	1.08618
AC010186.3	0.756312	0.459352	0.640468	0.487372	0.295765	0.838554	0.508544	0.405532	0.877672	0.625818	0.73067	0.353944	0.756209	0.312324	0.551546	1.00808	0.518478	0.39282	0.40408	0.400776	0.40234	0.703091	0.34277	0.577638	0.921755	1.23249	0.602805	0.435663	0.774205	0.541586	0.264529	0.362413	1.05981	0.426433	0.528	0.427783	0.459941	0.355696	0.534131	0.675761	0.616471	0.557014	0.696849	0.496933	0.486253	0.410024	0.296833	0.640718	0.500018
ADNP-AS1	1.37216	0.621388	1.05073	0.801842	0.832199	1.17973	0.75813	0.561342	1.01413	0.756514	1.35907	1.22047	0.850553	0.860641	1.19377	1.05133	1.40274	0.309976	0.844776	0.955654	1.25065	0.735522	1.09102	0.87107	1.31618	1.38937	1.14315	0.908168	1.04731	0.912786	0.996845	0.860447	1.24867	1.21902	0.836198	1.00803	1.07845	1.01895	1.06257	1.65533	0.772912	0.606077	2.71303	1.69826	2.8416	0.733859	0.602311	1.04008	1.51513
AP001189.3	0.411348	0.553021	0.367489	0.837315	0.182311	0.21537	1.07955	1.92566	0.352215	0.512975	0.498478	0.882318	0.851083	0.623902	2.43392	0.954642	0.312103	0.788205	0.542498	0.366374	0.692566	1.19182	0.466071	0.547223	0.65761	0.514389	0.43408	0.385208	0.451917	1.09455	0.181983	0.14247	0.625613	0.154986	0.545744	0.74428	0.915502	1.0479	2.0275	0.703619	1.07163	0.513153	0.458352	0.302282	0.299729	1.77405	0	2.01269	0.462321
TOLLIP-AS1	2.02005	1.12465	0.727933	0.52773	0.616173	0.895886	1.02564	0.856442	1.61164	0.995795	1.09776	0.741458	1.40704	0.617922	0.535687	0.451258	0.908787	1.26778	0.801275	0.653152	0.663063	1.1017	1.4002	0.935815	0.934626	1.56365	0.601887	0.858411	0.877267	0.355706	0.883172	0.454357	1.57513	1.05301	0.859908	0.55286	0.859928	1.41574	0.944089	1.19514	0.562236	0.43662	0.680939	1.39713	2.75334	0.370665	2.57666	1.23741	1.17525
AC010260.1	0.100824	0.108439	0.308823	0.323393	0.402169	0.591231	0.274404	0.284975	0.138128	0.15088	0.517467	0.419415	0.192558	0.196614	0.871177	0.574334	0.244794	0.216377	0.161875	0.102629	0.517338	0.177043	0.0380788	0.250371	0.548025	0.155175	0.191512	0.431619	0.354455	0.536558	0.535261	0.0838086	0.516517	0.151951	0.243209	0.234549	0.173725	0.131716	0.741717	0.931289	0.369149	0.114342	0.577772	0.395152	0.734652	0.500351	0.186862	0.558476	0.302179
AC064807.4	0.548296	0.117942	0.713759	0.405846	0.145804	0.688974	0.575583	0.174346	0.788719	0.656407	0.562814	0.256595	0.575941	1.06922	0.617948	0.485851	0.998421	0.151289	0.226364	0.502301	0.369255	0.173302	0.559113	0.583525	0.420741	0.632899	0.520736	0.528123	0.505991	0.109421	0.407518	0.273459	0.632004	0.297481	0.436461	0.297621	0.283423	0.386799	0.387223	0.337633	0.463267	0.447705	0.680771	1.12817	0.239709	0.116614	0.304855	0.121483	0.739486
SNHG29	147.708	144.045	49.1554	76.0379	32.8442	130.628	64.4946	44.4554	59.1011	72.4751	69.0527	91.4136	55.4826	76.1791	71.7849	61.8744	64.0507	38.4671	44.0881	36.4431	74.7407	61.0269	220.227	51.9215	88.4794	142.445	81.9378	75.2797	82.5343	62.7083	40.7574	51.5136	87.0477	99.6234	57.6108	56.6413	83.3158	79.5534	61.5474	95.7848	64.1842	70.0499	211.189	79.3808	185.118	49.2506	146.967	109.95	115.389
AC022211.2	0.124494	0.23432	0.40516	0.368601	0.268985	0.273764	0.980176	0.197932	0.351773	0.232878	0.985055	0.655446	0.534974	0.18208	1.22771	0.27579	0.680096	0.114504	0.406898	0.213846	0.359323	0.295121	0.17632	0.264987	0.328392	0.107778	0.177355	0.424696	0.656509	0.683233	0.826159	0.336325	0.418545	0.253295	0.337846	0.820577	0.294952	0.12198	0.604463	0.638851	0.131485	0.529452	0.653967	0.914856	1.36069	0.441301	0	0.448234	0.769567
AC079684.2	0.102131	0.164767	0.234621	0.188993	0.441332	0.0641676	0.17869	0.162377	0.262348	0.152836	0.30577	0.35847	0.146291	0.199163	0.517973	0.323212	0.650916	0.140903	0.210824	0.233909	0.540423	0.269009	0.231435	0.108693	0.489822	0.412616	0.290992	0.286923	0.134644	0.305728	0.271101	0.0848953	0.931976	0.230883	0.0739088	0.158394	0.395949	0.320218	0.405721	0.419273	0.215732	0.729698	1.41439	0.45031	2.34416	0.289623	0	0.396002	0.918294
FAM160A1-DT	1.18435	0.938591	1.6229	1.70716	2.23777	2.2715	0.872485	0.924974	1.53715	2.51859	1.59962	2.62544	2.02384	1.53971	1.75632	1.30197	1.92963	0.114664	1.97299	1.99868	1.85909	0.525393	0.706266	0.796071	1.49478	1.29514	3.03898	2.25153	2.9995	1.24398	1.787	1.19174	2.33515	2.42375	2.43589	2.17515	2.57773	2.49186	2.14609	1.91923	1.00068	1.06038	1.42883	1.09936	0.681297	0.132575	0	0.75961	0.280234
AP001628.1	0	0.0842144	0.299793	0.231831	0.104109	0	0.0913303	0.497956	0	0.117174	0.334891	0.244291	0.149542	0.152692	0.705979	0.148678	0	0.0720171	0	0.17933	0.376659	0.329984	0	0.0833314	0.525742	0.180765	0.198306	0.188549	0.154841	0.390652	0.581964	0.0650864	0.300849	0	0.16999	0.121435	0.067458	0.184125	0.622105	0.642886	0.0661579	0.319677	0.0747838	0	0.684644	0.222044	0	0.78069	0.528019
AL033384.2	0.391502	0.157902	0.487164	0.652024	0.55308	0.491952	0.856221	0.622445	0.402266	0.219702	0.879088	0.954261	0.560784	0.540783	1.10309	0.402668	1.42582	0.225053	0.269387	0.560407	0.61207	0.41248	0.0554481	0.416657	0.234706	0.451912	0.495765	0.864184	0.548395	0.976631	1.45491	0.528827	0.705114	0.663787	0.602048	0.75897	0.168645	0.421954	0.950438	1.80812	0.206743	0.432897	1.02828	1.00694	1.49766	0.277555	0	0.487931	0.990035
AC139887.1	0.390134	0.33568	0.179247	0.46204	0.155618	0	0.455055	0.33081	0.641376	0.350294	0.533952	0.73031	0.14902	0.405754	0.879388	0.345701	0.284166	0.143531	0.107378	0.178703	0.600546	0.575453	0.0884068	0.0830401	0.44906	0.270199	0.148209	0.50104	0.411466	0.467144	0.414235	0.0648588	0.599593	0.423339	0.282326	0.605053	0.0672221	0.366963	0.757692	0.880877	0.329633	0.106187	1.04331	1.60548	0	0.387218	0.216916	1.2966	1.40313
OTUD6B-AS1	4.22619	3.80647	3.13952	3.36736	2.61208	4.25589	3.57364	3.14113	2.62146	4.10695	2.89397	4.00601	2.69165	2.7423	3.04284	2.8371	4.13864	3.08095	3.23506	2.2426	3.10485	3.28666	3.64811	4.66768	4.1357	4.39391	2.74873	3.12994	3.33414	3.20167	2.9258	2.29362	3.06425	2.27347	2.6391	3.9712	2.9627	2.67807	3.43578	3.79998	3.05307	2.39053	4.32723	2.57621	6.17777	2.2379	0.96015	3.29542	2.56277
AC084117.1	0.0826505	0.177786	0.189869	0.183533	0.219786	0.207713	0.289212	0.175207	0.169846	0.247368	0.565593	0.128931	0.236776	0.10745	0.7452	0.0523125	0.602011	0.152036	0.853058	0.189293	0.23855	0.174158	0	0.263883	0.237836	0.0954037	0.104661	0.0663414	0.0544811	0.329884	0.175513	0.0687023	0.396953	0.0747375	0	0.640908	0.213617	0	0.218889	0.254476	0.558666	0.224958	0.473631	1.21473	0.903349	0.585949	0	0.915624	1.48628
AC010542.6	1.05152	0.628301	0.849938	1.42694	1.12626	1.54153	0.681391	0.309593	1.2605	0.524524	1.34921	1.36694	1.72933	0.949327	1.25094	0.887395	1.59564	0.64476	1.84904	1.15954	1.23646	0.984769	0.198568	0.746056	1.84914	1.14634	0.702766	1.35982	1.19373	1.45728	0.930402	0.922625	1.12227	0.52825	0.549575	0.951295	0.805258	1.14476	0.77356	1.55883	0.888455	0.83476	4.8541	1.71715	7.02342	1.49095	0.812017	2.84754	3.54547
FIRRE	0.0304858	0.0163942	0.00583614	0.00564137	0.0202672	0.00957693	0.0177795	0.0161564	0.00783101	0.0456212	0.00651939	0.00594458	0.0145559	0.0198166	0.0171793	0.0241195	0	0.0140197	0	0	0.00733249	0.0160597	0.00863536	0	0.00731052	0.00879747	0.0144767	0.00611754	0.0100477	0.0152098	0.0161846	0.0126705	0	0.00689178	0.00551539	0.00591001	0.0131322	0	0.00672814	0	0	0.575649	0.727916	0	0.0333203	0.113468	0.0423757	0.0928758	0.565348
AC011477.2	1.99346	1.07201	1.27208	1.47555	0.625817	1.80911	1.42094	1.17384	0.853444	1.16011	1.32627	1.90038	1.05756	1.15182	0.811306	1.36687	1.71416	1.12046	1.25736	0.887752	1.06549	0.991794	0.815624	1.47329	2.12459	3.5155	1.33229	1.15562	1.35054	2.65217	1.46987	1.05866	1.48931	1.8026	1.56281	1.11642	1.90824	1.17191	2.24863	1.25028	0.982518	1.05501	1.48083	0.325534	0.968355	0.902914	0.461822	0.858824	1.36918
ATP1B3-AS1	0.534151	0.319164	0.545369	0.61503	1.97281	1.64071	0.899943	0.691973	0.304909	0.444078	2.18302	1.80538	0.6801	0.655844	1.9398	1.01425	2.37762	0.709636	1.06178	0.498404	1.59879	0.687832	0.268982	3.9793	0.967789	0.411048	0.638824	1.14333	1.01717	1.18442	1.8905	0.542675	0.912147	0.483011	0.773093	2.94545	0.30679	0.697815	1.51941	2.92376	0.601755	0.242309	0.963637	0.523366	1.94605	0.589066	0.164995	0.525997	2.40136
AC005034.6	0.861977	0.721063	0.69673	0.708924	0.477539	0.902615	1.50813	1.57348	0.934881	0.931612	1.22889	1.4567	0.914584	1.08949	1.18736	1.18208	0.436006	1.54157	0.691965	0.475264	0.598936	1.00907	0.0542582	1.37604	0.689009	0.497491	0.758009	0.499696	0.631326	1.48129	0.966074	0.796121	0.689983	0.519634	0.693093	1.11402	1.23769	1.01348	1.26824	0.83551	0.566459	1.40116	1.32637	1.40762	1.25616	1.22219	0	1.85679	0.96879
NCBP2-AS1	0.198538	0.0427066	0.152031	0.264522	0.211182	0.199582	0.324206	0.168348	0.244795	0.178264	0.407589	0.216797	0.227507	0.0774327	0.537021	0.100529	0.144611	0.109563	0.327866	0.0909415	0.420222	0.125505	0	0	0.3047	0.458345	0.150846	0.223105	0.31409	0.475456	0.252963	0.0330064	0.381414	0.107718	0.143675	0.246328	0.273673	0.0933731	0.385587	0.733542	0.0335498	0.189133	0.872256	0.583587	0.954785	0.112602	0	0.615847	0.981814
Z82243.1	0.0943579	0.152227	0.325146	0.174608	0.125459	0.0592838	0	0.0500061	0.387809	0.141204	0.524638	0.294389	0.0450524	0.184005	0.797584	0.119445	0.515464	0.173572	0.162316	0	0.181561	0.0994137	0	0.150631	0.0452541	0.217835	0.0896149	0.189346	0.248793	0.094153	0.200374	0.196085	0.135954	0.042662	0.341418	0.439015	0.0812919	0.110942	0.166596	0.290522	0.15945	0.513647	0.63084	0.970753	1.03131	0.367922	0.131159	0.156798	1.0605
AP001429.1	0	0	0.0322419	0.0311659	0.0559832	0	0	0.133884	0	0	0.10805	0.032841	0.120622	0.0273693	0.237269	0	0	0	0.0869153	0.0964323	0.0405086	0.133083	0	0	0.323097	0.0486019	0.026659	0.0337965	0.138773	0.168054	0.0447061	0.0349993	0	0	0	0.0979501	0.0362746	0.0660071	0.0371698	0.129639	0	0.0573007	0.683637	0.247529	0.276118	0.0298502	0	0.233225	0.0946449
LINC01558	1.22705	0.492101	0.493695	0.446431	0.559963	1.45041	0.303228	0.562115	0.384646	0.435718	0.249061	0.73808	0.42699	0.324452	0.574266	0.579191	0.284034	0.219978	1.47397	0.047632	0.780347	0.328677	0.153167	0.442674	0.917651	1.94453	0.309449	1.11012	0.692311	0.632944	0.331234	0.0432191	0.809074	0.206869	0.218231	0.1774	0.662949	0.766187	0.66095	0.87513	0.3163	0.261805	6.31655	2.13964	1.09109	0.117954	2.19706	0.0806398	0.0934982
AC244090.1	7.57538	6.38157	2.62896	3.70134	3.79572	7.26821	4.26564	3.44114	4.52449	4.57921	3.54323	3.66743	3.17153	3.42024	3.70108	3.75548	2.92197	3.98141	4.44218	4.13089	3.91334	5.54365	8.20261	4.36863	3.61526	5.81516	2.52815	3.50455	3.71437	3.50019	3.60565	2.82277	3.4053	4.01558	3.94275	2.83586	4.50096	4.2706	4.41438	3.48521	3.15301	2.74238	7.30643	5.04578	3.34451	3.41281	2.48982	3.18325	5.53625
FOXP4-AS1	0.788454	0.822308	0.896492	0.742777	0.238258	0.510387	0.529501	0.253243	0.343692	0.32179	0.940132	0.652249	0.296603	0.310615	0.430843	0.408306	0.261043	0.0659257	0.213721	0.0912011	0.643626	0.453109	0.324852	0.559409	0.82504	1.24107	0.544598	0.536982	0.472481	0.762901	0.228317	0.278046	0.573754	0.604942	0.345804	0.685511	0.288177	0.430743	0.843683	0.465903	0.242248	1.78835	6.04716	4.49474	4.85719	0.372649	1.59413	1.93222	4.24281
AC018638.7	0.260416	0.12927	0.444846	0.341035	0.199761	0.528605	0.677598	0.318486	0.267576	0.629523	0.565466	0.515609	0.554743	0.143234	0.361228	0.2409	1.34966	0.257943	0.289458	0.198809	0.905806	0.401002	0.113484	0.724849	0.269006	0.693689	0.304401	0.3859	0.303705	0.639632	0.553007	0.166514	0.40408	0.199255	0.318922	0.233005	0.36242	0.314038	0.601256	1.02795	0.203106	0.381662	0.49744	0.647708	1.5764	0.227226	0	0.266304	0.405257
AL031673.1	0.383101	0.463541	0.84341	0.212677	0.191016	0.180523	0.446852	0.76136	0.393634	0.358312	0.614445	0.224108	0.228646	0.186769	0.107942	0.424337	0.348805	0.704716	0.955571	0.0731175	0.506792	0.655896	0.325549	0.662539	0.505273	0.718599	0.242563	0.192191	0.126265	0.668971	0.355922	0.19903	0.41399	0.476332	0.311892	0.557012	0.165026	0.412899	0.338197	0.442329	0.161845	0.325851	3.476	1.97067	3.34976	0.10185	0.532516	0.159154	0.64586
MIR223HG	0.491805	1.30915	0.1883	0.473241	0.408693	0.52529	1.24768	0.234574	0.922221	0.735971	0.294482	0.709655	0.798384	0.583426	0.110856	0.521395	0.985109	0.214861	0.355323	0.300366	0.366697	1.29539	1.39308	1.23	0.801958	0.780576	0.57607	0.700696	0.988764	0.368053	0.939937	0.521229	1.34636	0.9895	0.605034	0.943883	0.317777	0.183111	0.260496	2.41016	0.581752	0.920284	0.105686	2.27686	0.725666	1.38594	0.0683615	0.16345	0.912033
AL031775.1	0.603805	0.351764	0.847669	1.06147	0.886454	0.758726	1.26184	0.479991	0.672107	0.527087	0.968427	0.883041	0.768787	0.866745	0.850637	0.859883	1.42019	0.323955	1.12523	0.94113	0.774549	0.795198	0.399076	1.31198	0.965285	1.01642	0.605313	0.969317	0.961865	0.728014	0.747958	0.773772	0.869985	0.864495	0.819287	0.780361	0.910341	0.631049	1.33258	0.671334	0.616454	0.890195	1.97035	0.961372	1.31989	0.499411	0.279766	0.947625	0.395865
AC009120.3	0.348002	0.187143	0.532966	0.579577	0.231354	0.273306	0.558129	0.507177	0.223481	0.260388	0.706991	0.712515	0.373856	0.282763	0.490263	0.523125	0.633696	1.08026	0.359182	0.166047	0.837019	1.05411	0.246436	0.370362	0.917962	0.60255	0.275425	0.523748	0.802879	1.34558	0.96994	0.180796	1.0864	0.35402	0.692553	0.775836	0.262337	0.443264	1.34405	1.20541	0.183772	0.118399	1.20485	0.767195	0.950894	0.678468	0	0.819243	0.78225
AL022328.3	0.427251	0.212086	0.402668	0.291922	0.284039	0.412979	0.651687	0.243844	0.776688	0.245911	0.815279	0.487053	0.313841	0.299087	0.555607	0.208017	0.658311	0.15114	0.520127	0.150542	0.94858	0.554023	0.111713	0.384748	0.662017	0.493177	0.249708	0.527604	0.584929	0.623087	0.383854	0.163914	0.505107	0.505221	0.237836	0.662618	0.198201	0.257613	0.667305	1.88889	0.416531	0.626172	0.596398	0.676239	0.790264	0.489298	0.182734	1.05587	1.32977
AL355353.2	3.17829	1.891	3.2623	1.90207	3.19189	3.73883	1.41977	1.50518	4.65532	2.42871	2.02457	2.37351	2.51843	2.72532	1.52427	2.18286	2.58591	0.497573	2.00081	2.06501	1.82166	1.42493	4.67377	1.43936	2.27025	2.41979	2.56896	3.09392	2.58537	1.88934	2.29762	2.69813	3.37771	2.9963	3.91493	1.67801	3.26252	3.02133	3.04454	2.70669	2.62827	0.828255	2.3251	1.39141	5.61719	1.58206	2.63192	1.79795	1.67206
AC007996.1	0.522096	0.331813	0.690556	0.84317	0.462789	0.397607	0.35985	0.368922	0.601475	0.355137	0.636067	0.765087	0.581657	0.581052	0.401195	0.520714	0.79226	0.138239	0.092533	0.386504	0.37292	0.441723	0.241998	0.631411	0.698078	0.78528	0.636093	0.850844	0.672661	0.74987	0.478756	0.401109	0.88143	0.457804	0.555285	0.907858	0.517951	0.564255	0.844984	0.633257	0.434447	0.721286	0.188882	0.279029	0.311257	0.572033	0.43983	0.692317	0.586792
AC141002.1	0.0799844	0.0860255	0.244993	0.355225	0.212696	0.603037	0.279883	0.169555	0.164367	0.119694	0.684185	0.124772	0.381896	0.155975	0.36058	0.253125	0.291296	0.147132	0.27518	0.122124	0.384759	0.50562	0.0906248	0.170247	0.383606	0.184652	0.101285	0.192604	0.210895	0.558675	0.254777	0.0664861	0.230489	0.289307	0.231528	0.18607	0.206726	0.25078	0.211828	0.492533	0.0675806	0.163276	1.29866	0.235108	1.22389	0.226819	0	0.531653	0.359583
AL591895.1	6.15604	3.3105	9.67351	11.0594	5.75517	9.83055	8.75117	9.24366	8.36783	4.79809	11.3545	11.9539	8.45044	8.08652	15.0325	9.09155	14.8297	6.6057	5.16247	5.82566	13.1408	11.9584	3.19687	10.4416	10.5181	15.2482	9.29772	9.26492	8.74985	10.6857	10.4173	7.19598	11.2721	5.7986	9.93075	11.785	7.62392	8.34383	9.56695	13.9523	4.2803	4.53795	25.968	29.5932	27.1939	3.09139	8.73525	28.558	22.198
AC090948.3	0.526503	0.217796	0.403171	0.509628	0.350022	0.356241	0.850316	0.429272	0.749048	0.181822	1.07396	0.600197	0.966869	0.394892	0.821613	0.487047	0.589993	0.0745004	1.39338	0.278271	0.701364	0.597384	0.22944	0.646537	0.543871	0.420746	0.410288	0.552644	0.533934	0.646597	0.258014	0.370319	0.661348	0.292982	0.674099	0.659519	0.418705	0.285711	0.536297	0.789752	0.376415	0.275584	1.2378	0.357142	0.619721	0.631677	0	0.852478	0.364151
AL117382.3	0	0	0.16961	0	0.0368128	0	0.0645884	0.176076	0.113793	0.0828653	0.1421	0.0431904	0.158634	0.0359943	0.124816	0	0.100833	0	1.56218	0.253643	0	0.0583408	0.125481	0.0589317	0.0531147	0	0.0701206	0.0888941	0.109503	0.221014	0.352768	0.138087	0.0531897	0.0500723	0.0400721	0	0.047706	0.0868084	0.0488834	0.113662	0.14036	0.0753582	0.105774	0	0.121044	0.0392571	0	0.122689	0.373413
SH3BP5-AS1	0.400926	0.364224	0.530561	0.3832	0.318293	0.586944	0.780919	0.862281	0.751908	0.693174	1.81798	0.880457	0.598444	0.47315	1.0441	0.514912	0.921445	1.06688	1.15705	0.329851	0.808899	1.13599	0.383697	0.836803	1.06037	0.593091	0.409116	0.734233	0.656852	1.00208	1.0415	0.287967	0.938479	0.517414	0.425346	1.07757	0.452721	0.378335	1.16145	2.22916	0.397951	0.172162	0.643156	0.457667	1.01255	0.667817	0.0865698	1.07805	0.76997
AC007878.1	0.0276355	0.0445841	0.0634857	0.061367	0.0459305	0.017363	0.11282	0.263624	0.113581	0.0620335	0.307311	0.150886	0.0395848	0.0538912	0.373753	0.0612202	0.17613	0.0889623	0.0950777	0.063293	0.132938	0.131023	0.0313119	0.249994	0.251826	0.0797492	0.0787391	0.0221823	0.154841	0.30333	0.32277	0.0459434	0.0796364	0.0374845	0.0999942	0.0642892	0.107139	0.0324927	0.353746	0.397076	0.0116749	0.0376091	0.197957	0	0.0906146	0.127349	0	0.290845	0.12424
MIAT	0.244395	0.148116	0.423307	0.39913	0.20116	0.299789	0.332576	0.193253	1.99098	0.223502	1.02869	0.35704	0.99279	0.297553	0.358512	0.346203	0.377925	0.0784958	0.106771	0.279867	0.634476	0.494546	0.103291	0.260098	0.967467	0.282106	0.257901	0.541802	0.38357	1.15545	0.62402	0.288604	0.633469	0.294663	0.227392	0.276752	0.15708	0.0988243	0.332186	0.716646	0.254022	0.224372	0.222304	0.148238	0.487597	1.93753	0.0377459	0.234218	1.36904
AC106876.1	9.63443	4.45777	6.03238	7.02978	6.16779	9.31259	3.52178	3.11299	4.59712	3.5736	4.06194	5.20245	3.90549	4.97798	3.46477	6.7929	5.04823	0.959342	6.87483	5.09205	6.94525	2.16894	8.55251	4.52788	5.13409	7.98434	5.56134	6.49949	6.20602	3.83445	4.5465	4.6317	4.82496	8.16597	5.26384	6.08744	4.87141	4.97002	3.68315	5.49329	4.87029	6.38765	11.0368	7.82624	6.78012	1.18703	3.28123	0.66898	7.83585
AC074117.1	0.909107	0.597917	1.0918	0.837516	0.656556	1.0273	0.915444	0.928924	0.8669	0.743844	1.20843	0.99986	0.774448	0.680221	1.37841	0.674757	1.04805	0.493271	0.711048	0.674065	1.76186	1.0474	0.941122	0.800465	1.50564	0.875746	0.824071	1.27569	1.26319	1.36396	1.04166	0.614334	1.09942	0.857554	0.965536	1.15127	0.738143	0.861266	1.54159	1.26194	0.5084	1.36181	2.83595	1.74946	4.66077	0.913442	0.563652	1.68097	1.54367
WNT5A-AS1	0.133894	0.384018	0.239235	0.297323	0.118684	0.22433	0.468524	0.425752	0.321009	0.200368	0.496308	0.313303	0.298337	0.725286	0.603612	0.310736	0.325086	0.451547	0.0921302	0.272582	0.47233	0.329159	0.151706	0.0949978	0.299673	0.154554	0.508654	0.394068	0.470717	0.267206	0.094777	0.296794	0.385838	0.403583	0.452174	0.242263	0.269157	0.314854	1.1032	0.320639	0.26397	1.00219	0.426268	2.23023	0.195123	3.10084	0.248152	0.741656	0.702265
AL391121.1	0.975999	0.480378	1.12739	0.673452	0.527877	0.727534	1.02264	0.789015	0.764873	0.668389	0.806567	0.825772	1.23215	0.881741	1.11863	0.910912	0.512089	1.17155	1.73015	0.644073	0.843503	0.976009	0.206173	0.40492	0.967915	1.27936	0.701751	0.663905	0.719684	0.957373	0.509365	0.343766	1.20763	0.972308	0.514759	0.487451	0.598571	1.10216	1.60637	0.984702	0.335448	0.787937	0.300189	3.16063	0.614733	2.72082	2.29941	3.53693	3.30941
AC096921.2	0.197999	0.15032	0.222967	0.413811	0.162603	0.336612	0.706427	0.604902	0.263279	0.348588	0.727286	0.490558	0.300295	0.227125	0.8401	0.390705	0.46659	0.428494	0.745313	0.1067	0.280135	0.650366	0.197946	0.570185	0.268124	0.430213	0.324472	0.252416	0.222644	0.499733	0.383362	0.193629	0.212565	0.179042	0.244427	0.532863	0.371266	0.209976	0.976774	0.442278	0.334587	0.451736	1.19026	0.205413	0.381896	0.363313	0.129516	0.4516	1.09958
TMEM147-AS1	0.615414	0.528528	0.53104	0.431731	0.32364	0.577099	0.616042	0.627953	0.849404	0.563566	0.970349	0.591057	0.578904	0.397049	0.605599	0.415679	0.72758	0.582925	0.319173	0.185826	0.941142	0.851615	0.483936	0.615854	1.40528	0.991343	0.383837	0.656177	0.523732	0.934864	0.42912	0.305407	0.82495	0.514965	0.398824	0.776371	0.273011	0.34919	0.871681	1.58373	0.527738	0.684389	3.68017	5.39989	4.01571	0.716308	0.587312	0.895462	1.98211
AC011477.1	1.98684	1.35511	2.44913	1.57826	1.90075	2.64885	2.28921	1.72068	1.71782	1.16029	2.46641	2.17335	1.50395	1.96875	1.85693	1.82497	2.25019	1.2257	1.81726	1.38733	2.5176	1.68485	1.70209	2.81074	2.90516	3.44013	2.11709	2.60611	2.28395	3.02215	1.9295	1.45013	2.28086	2.01572	1.91124	1.55947	1.94134	1.84225	2.20315	2.61107	1.1055	0.428666	4.00349	1.06832	3.70756	0.893239	0.673595	2.52319	2.34197
MIR4453HG	0.885187	0.888041	0.89998	0.732295	0.573641	0.934708	0.928372	0.749009	0.871309	0.901657	1.10715	0.957315	0.752946	0.536712	0.955719	0.574391	0.988803	0.519963	0.506716	0.442946	1.12357	0.736689	1.2305	1.06873	1.5269	0.77277	0.58872	1.09861	0.701172	0.927799	0.702929	0.544122	0.885999	0.497752	0.608281	0.940212	0.589583	0.594724	0.879933	1.56502	0.710205	0.678249	2.75653	2.51448	3.60978	0.585363	0.413587	0.939431	1.07012
LINC02604	0.661492	0.132526	0.888926	0.566439	0.444075	0.562292	1.1044	0.659889	1.04617	0.388198	1.30365	1.06225	0.848429	0.552238	1.14021	0.537719	1.22816	0.512973	0.789841	0.623825	1.4912	1.5032	0.28657	0.752308	0.727814	1.33249	0.710365	0.838087	1.12002	1.07421	0.537097	0.393526	1.22097	0.797548	0.497472	0.65376	0.502847	0.584588	1.29959	1.61072	0.531512	1.12528	2.59526	2.80223	2.8778	0.73563	0.432698	2.09069	5.26254
CCDC18-AS1	0.704066	0.757244	0.606978	0.748933	0.502165	0.761672	1.08228	0.859926	1.17377	1.0885	1.45978	1.35653	0.618901	0.572833	0.756722	0.808624	1.01886	0.72476	0.779623	0.441394	2.19809	1.81272	0.54943	0.987493	1.71743	1.64694	0.646535	1.20887	1.12798	1.33063	0.905985	0.321692	1.38842	1.01612	0.735582	1.04492	0.783322	0.467815	1.2472	1.67967	0.456995	0.412455	3.91888	1.97361	3.6285	0.743761	0.207399	2.31412	2.13811
AC012640.4	1.80804	1.01226	0.739668	0.641651	0.444573	1.08928	0.520005	0.446281	0.661663	1.03779	0.6144	0.521592	0.662236	0.37029	0.558279	0.407584	0.541209	0.501162	1.00549	0.510524	0.643371	0.547989	1.796	0.395385	0.974044	0.714734	0.595908	0.735572	0.636721	0.247138	0.447061	0.247054	0.618559	0.582306	0.555628	0.806648	0.405422	0.621244	0.80899	0.889676	0.648729	0.573007	0.331174	0.800829	1.29938	0.316061	0.826256	1.09753	1.00212
AC003102.1	1.88552	0.906603	1.27397	0.903068	1.09128	1.5052	1.48775	0.670087	1.93736	0.647313	1.95442	1.07272	2.04413	1.34099	1.80003	0.828368	1.53495	0.459055	0.526589	1.1685	2.41159	0.923159	1.08074	1.14498	1.65965	1.30587	0.800566	1.25528	0.950441	1.17312	1.33074	1.29073	1.43826	1.22359	0.963165	1.08368	0.8791	1.24321	2.4576	2.12864	1.14329	0.520747	0.783892	1.36928	1.23649	0.487515	1.66504	0.700371	1.12191
AC003070.1	0.830122	0.525188	2.16875	1.66264	2.66196	1.90214	2.44913	0.776354	2.85988	0.876885	4.42759	3.27547	2.33149	1.65054	3.4121	2.03984	4.97943	0.314385	2.45277	1.41659	5.54356	1.44052	0.829901	0.883459	2.24825	1.6346	1.57679	3.33159	3.25098	2.97221	5.23658	1.09593	4.69047	2.73765	1.87287	2.49912	1.13586	1.45447	3.27615	8.66999	1.19649	1.3623	3.82428	4.16249	5.23033	1.24626	0.543003	2.6507	5.92721
AC020915.3	1.38443	1.2231	0.725682	0.902753	0.701237	1.58431	1.06692	0.777366	0.922925	0.912558	1.22653	0.951273	1.03087	0.771353	1.19808	0.667621	0.765297	1.06869	0.533004	0.786391	0.713537	1.39783	0.868332	1.15766	0.743017	1.30317	0.72003	1.29645	0.961467	1.31564	1.08496	0.883642	0.957788	0.864394	1.01975	0.773208	0.511166	0.87847	1.12031	1.0149	0.640568	1.35698	2.07782	0.968909	1.00876	0.625114	1.21419	1.36938	1.07437
AC010168.2	0.402898	0.176869	0.324261	0.334741	0.45917	0.59926	0.364446	0.339891	0.30837	0.246092	0.309472	0.397625	0.384738	0.264566	0.31971	0.255009	0.546501	0.158814	0.444131	0.213425	0.510238	0.333525	0.186325	0.415659	0.611239	0.53625	0.244686	0.366295	0.34146	0.562012	0.47144	0.239218	0.363313	0.379195	0.31834	0.140272	0.226683	0.164349	0.798452	1.05906	0.18063	0.229393	0.427995	0.217523	1.35702	0.253573	0.0342878	0.382578	0.267998
AC145423.2	0.0933709	0.100423	0.142998	0.138226	0.124147	0.117327	0.108909	0.197932	0.095938	0	0.159739	0.218482	0	0.0606934	0	0	0	0.515269	0.064247	0.0712819	0.0898307	0.196748	0.105792	0.19874	0.179123	0.215557	0.0591184	0.299785	0.0615477	0.186336	0	0	0	0.168863	0	0	0	0	0.164853	0.0958276	0.394456	0.127068	0.356709	0.82337	1.42873	0.13239	0	0.103439	0
AC079907.1	0.179002	0.320871	0.365524	0.0883312	0.119002	0.149953	0.278386	0.0632431	0.245232	0.357163	0.204158	0.279236	0.227912	0.271497	0.336236	0.26436	0.869214	0.0548793	0.0821125	0.0455518	0.287026	0.125729	0.338026	0.127002	0.457865	0.206623	0.151115	0.191574	0.235988	0.29769	0.570182	0.0991959	0.171942	0.0539549	0.302255	0.231344	0.257026	0	0.158021	0.367425	0.151243	0.284205	0.740839	1.40311	1.04344	0.71912	0	0.727113	0.134122
FMR1-IT1	0.260241	0.34987	0.19928	0.144472	0.216262	0.327012	0.45532	0.482712	0.334245	0.486803	0.667829	0.507455	0.310638	0.169163	0.43995	0.247074	0.829301	0.239357	0.268601	0.298012	0.563341	0.274185	0.221146	0.346202	0.811276	0.300397	0.329546	0.208888	0.343088	0.649189	0.0690794	0	0.687435	0.0588313	0.141245	0.302703	0.168153	0.254984	0.689212	0.934808	0.109942	0.265621	2.05056	0.764958	1.42218	0.415119	0	0.288302	1.02371
LINC00654	1.30121	0.899946	1.05885	1.45654	1.72539	1.47023	1.26548	1.86397	1.8033	1.45909	1.06453	2.32298	1.15792	1.87141	0.61138	2.01969	1.78193	1.19027	1.16126	1.77293	2.34685	1.40082	0.514203	1.58481	2.77853	1.93172	2.18427	1.31481	1.44201	1.84675	1.50583	0.845844	1.96509	2.13526	1.25467	1.03376	1.1363	1.88981	2.13777	3.08573	1.6027	0.390835	3.67075	0.906702	3.61943	0.731459	0.325271	0.282805	0.270973
AC005229.4	0.893438	1.04827	0.792993	0.563624	0.458971	0.650638	0.888164	0.699472	0.813684	1.00275	0.677399	0.934429	0.581705	0.607155	0.732316	0.629749	0.53614	1.23261	0.398197	0.356539	0.644672	0.919916	0.72471	1.03728	0.808295	1.05474	0.527116	0.82308	0.555469	0.688884	0.549775	0.447284	0.789933	0.624286	0.573079	0.873886	0.734734	0.795809	0.83353	0.708549	0.609056	0.815192	0.824221	0.925137	0.466059	0.770158	1.01609	0.708588	0.753112
AC083799.1	7.84726	8.12345	5.91516	6.73424	7.82535	7.58038	6.40717	5.51035	8.71813	6.31197	5.22319	6.12069	5.83092	7.60355	5.2512	6.81384	9.64541	3.49599	6.95195	7.71317	5.07247	6.53667	7.9465	7.17704	5.88055	8.80335	6.36594	5.88543	4.93024	4.67366	6.82186	6.25795	7.3493	5.76547	6.90328	5.28643	6.16907	7.26586	6.21307	6.24164	6.02945	5.80689	16.7696	4.68537	9.64896	4.79835	3.40869	7.93273	3.25225
NORAD	37.1161	31.4051	46.4733	49.5322	37.7016	40.347	44.9404	55.9757	39.4336	48.0999	43.7908	52.7225	43.0786	44.3458	46.1838	46.6403	50.4008	51.883	39.0592	36.5329	50.2779	51.8888	27.8038	61.2975	52.5648	50.2298	49.258	44.4902	49.2185	51.9498	49.2081	34.0418	50.0857	35.2029	45.6886	48.3548	42.1384	44.7896	53.2295	45.9214	40.9272	55.0676	129.761	86.3709	94.2908	50.1584	22.1589	69.2156	57.0204
MAFG-DT	0.788996	0.430627	0.342666	0.828076	0.164405	0.443925	0.50822	0.374452	0.362995	0.546299	0.402929	0.174516	0.416075	0.298535	0.252168	0.283233	0.257324	0.292439	0.299808	0.170813	0.294569	0.694794	0.280196	0.46371	0.327573	0.421387	0.260963	0.72783	0.15525	0.458269	0.162546	0.205563	0.305413	0.340756	0.213048	0.465715	0.385525	0.323069	0.384644	0.386749	0.467643	2.47602	1.63084	3.94609	2.90883	2.53798	3.7321	3.70502	1.72059
AL354993.2	0.288209	0.0442825	0.0315281	0.274283	0.0547437	0.206946	0.240121	0.04364	0.169219	0.308069	0.176096	0.481708	0.196585	0.0535266	0.0928062	0.156358	0.0749737	0	0.0283303	0.0628648	0.277282	0.0867577	0.0466501	0.219091	0.39493	0.475258	0.20855	0.19829	0.2714	0.287583	0.174865	0.171122	0.276842	0.148923	0.119181	0.159636	0.106414	0.129091	0.218081	0.464817	0.139151	0.196112	1.65159	1.21024	0.180003	0.0875681	0	0.684184	0
AC234772.2	0	0	0.0647281	0	0	0	0	0	0	0	0.397683	0	0.0403595	0.0549459	0.714502	0	0.0769616	0	0	0	0.081324	0.0445291	0	0.13494	0.0810803	0	0	0	0	0.126518	0.134626	0	0	0	0	0.163869	0	0	0.0373106	0	0	0.0862766	0.0403663	0	0.646716	0	0	0	0.190007
AP003392.1	0.640028	0.275347	0.65347	0.157915	0.567325	0.375313	0.696765	0.316578	0.482258	0.383113	1.42345	1.06498	0.61118	0.305092	1.20222	0.75618	0.699277	0.510178	0.792708	0.195446	1.92938	0.764231	0.241724	0.408691	0.859482	1.08355	0.729428	0.753475	0.787528	1.2347	0.815481	0.532016	0.737741	0.347251	0.5558	0.661741	0.514641	0.133781	1.54436	2.10198	0.21631	0.290338	1.26332	0.627105	1.49234	0.453747	0.11862	1.13446	2.39779
AC008124.1	2.04579	1.45783	1.45592	1.55333	1.14659	1.96548	1.65591	1.86695	1.30788	1.99064	1.64991	2.08404	1.32502	1.18819	1.65947	1.28905	1.67053	1.89217	1.29563	0.9595	1.74095	1.55373	1.55136	2.03567	2.26812	2.07555	1.61623	1.81883	1.96837	1.52872	1.34665	0.821674	1.80869	1.41026	1.29956	1.44412	1.67359	1.77616	2.22713	2.06196	1.153	0.939484	1.48296	0.991006	1.78479	0.695913	0.427189	1.73282	1.14965
AC080129.2	0.155691	0.0558165	0.397401	0.30731	0.310512	0.195637	0.84746	0.550068	0.479913	0.232986	0.799065	0.607176	0.446019	0.168671	0.292448	0.262779	0.945017	0.143197	0.428513	0.0396195	0.748937	0.273388	0.352805	0.386619	0.846252	0.599047	0.230012	0.416562	0.547345	0.517841	0.551029	0.215693	0.498499	0.563139	0.450672	0.120729	0.312974	0.162715	0.503953	1.06525	0.219244	0.282506	2.82526	1.37292	2.94954	0	0	0.229971	0.349966
NDUFV2-AS1	1.02851	0.419014	0.680188	0.565209	0.642321	0.704947	1.09061	0.512039	0.832624	0.676289	0.879789	0.838683	0.863106	0.496355	0.82547	0.838388	0.851307	0.773982	0.80421	0.487773	0.734642	0.78809	0.565013	0.547299	0.777284	0.791478	0.769612	1.00068	0.790965	0.932982	1.04241	0.492239	0.6736	0.648212	0.721746	0.616292	0.5236	0.671825	0.976745	1.19952	0.460841	0.434757	0.595346	0.778713	0.476908	0.32039	0.476549	0.638763	0.630525
AP001486.2	0.467	0.539826	0.36429	0.293982	0.208911	0.340027	0.748344	1.03161	0.233193	0.992762	0.604807	0.476589	0.279241	0.397184	0.575515	0.383979	0.476852	1.00758	0.603631	0.349857	0.344319	0.533408	0.202749	1.25877	0.347474	0.498756	0.226599	0.245228	0.313589	0.683737	0.342925	0.137861	0.364734	0.197332	0.372695	0.514431	0.409854	0.574739	0.531703	0.582313	0.261824	0.222736	0.87121	0.461847	0.753704	0.389869	0.169868	0.391643	0.588638
AC107952.2	0.321419	0.642005	0.597736	0.849688	0.183155	0.519282	0.803368	0.438017	0.471794	0.893274	0.589159	0.823728	0.438473	0.41786	0.621	0.552187	1.3378	0.886877	0.347542	0.315488	0.530112	0.628904	0.208101	1.27055	0.352349	1.06004	0.232581	0.663414	0.726414	0.733076	0.390029	0.343512	0.617482	0.539771	0.465199	0.605302	0.712057	0.611856	0.770164	0.989627	0.465555	0.281198	0.789385	0.134969	0.301116	0.162764	0.12765	0.152604	0.516068
AC009812.1	1.13791	0.951886	1.35544	0.951458	0.784505	1.21803	1.401	1.54112	1.12589	1.67131	1.08152	1.36419	0.865271	0.643785	0.736228	0.880272	1.95696	1.22103	0.289991	1.07784	1.35832	0.932461	1.26541	2.04079	1.09148	1.07025	0.893921	1.15017	1.62517	1.07236	0.80547	0.788228	0.789408	0.914635	1.09795	0.833362	1.21635	1.25532	1.33938	1.42737	0.801203	0.358467	2.0931	2.10598	3.17836	0.283845	0.585817	0.700336	0.947343
AL158166.2	0.179002	0.160435	0.0685357	0.110414	0.178503	0.22493	0.243588	0.221351	0.122616	0.223227	0.255197	0.139618	0.256401	0.155141	0.168118	0.321008	0.271629	0.0274397	0.143697	0.409966	0.143513	0.157161	0.338026	0.158753	0.200316	0.344372	0.113337	0.191574	0.393313	0.238152	0.158384	0.123995	0.171942	0.32373	0.0863586	0.161941	0.10281	0.280619	0.0790107	0.367425	0.201658	0.284205	0.227951	0.263082	0.13043	0.190355	0	0.0991518	0.402367
AC008915.3	2.81439	1.52539	1.51028	1.45988	1.17859	2.97956	1.47335	1.10396	1.29788	1.02804	1.70605	2.36801	1.77758	1.19561	1.52352	1.31846	1.8159	0.387262	1.46384	1.45494	2.51579	1.40088	4.54465	1.01413	1.97685	2.60915	1.57148	1.90328	1.86978	1.12773	1.12942	1.41839	1.42619	1.54299	1.55557	1.51221	2.10011	2.55343	1.89762	2.27436	1.42302	1.04046	0.93127	0.846809	1.35637	0.754112	1.60178	1.2275	0.398505
AP000254.2	0.901208	0.784652	1.57737	1.49297	1.6262	1.24029	1.2514	1.3191	1.32284	1.8624	2.64306	1.40585	2.13098	1.86901	2.51505	1.81987	2.57881	1.61831	2.68713	1.2122	1.56893	1.49207	0.972474	2.14659	1.72888	1.0898	1.68465	1.44675	1.32955	1.84132	1.36698	1.60526	1.60766	1.20299	1.58385	1.29784	1.84861	2.05193	2.4625	2.37837	1.19657	1.08045	2.86911	2.2706	3.84618	0.821456	1.31234	1.09347	2.41162
GARS1-DT	0.406181	0.352204	0.441251	0.395596	0.383082	0.503069	0.57238	0.480989	0.549142	0.443518	0.733959	0.639688	0.443548	0.392883	0.501586	0.444673	0.753792	0.437042	0.334314	0.32641	0.877853	0.863055	0.338005	0.474679	0.624493	0.60682	0.380842	0.527264	0.627725	0.604069	0.591195	0.278668	0.583373	0.420014	0.364259	0.537258	0.399328	0.382361	0.690551	0.913519	0.337444	0.334572	1.66219	1.24821	0.788056	0.459498	0.189099	0.668508	0.784153
AL136295.6	0.746116	0.656565	0.519399	0.627581	0.473475	0.809701	0.949391	0.43136	0.906016	0.406015	1.10239	0.793574	0.518172	0.220452	0.649785	0.407847	0.370539	0.436699	0.280031	0.44015	0.815712	0.643168	0.268982	0.649681	0.91086	0.587211	0.365042	0.76222	0.603598	0.947539	0.576152	0.479246	0.553804	0.613348	0.589024	0.368181	0.584363	0.611419	0.987993	0.870167	0.51579	0.46154	0.744997	0.996887	1.92751	0.577044	0	0.788995	0.60987
AL021707.3	0.465791	0.455429	0.583659	0.47015	0.506717	0.691719	0.839649	0.897643	1.04421	0.887146	1.73863	0.726615	1.49613	0.743177	1.38399	0.857647	0.693969	0.856826	0.815828	0.517233	1.91474	0.892271	0.0959557	0.405589	1.13728	0.635421	0.509405	1.15562	0.949025	1.22533	1.12401	1.02076	1.09821	0.574359	0.612868	1.54329	0.583697	0.69702	0.747628	1.86873	0.393558	0.605082	1.33461	1.12022	1.29589	1.38093	0.824035	1.21967	1.80849
MIR600HG	0.600404	0.232631	1.00233	0.872271	0.711531	0.824742	1.18749	1.19371	1.22616	0.786874	1.69387	1.51544	0.890282	0.824189	0.806968	1.38553	1.48717	1.25879	1.14701	0.723135	1.48895	0.726872	0.236618	1.20256	1.45229	0.757618	1.21365	1.50565	1.32251	1.51822	1.33834	0.554877	2.00599	0.836301	0.963438	0.636195	0.973485	1.21017	1.17528	2.23899	0.541955	0.416158	1.44606	0.471356	0.872251	0.264382	0.445795	0.999781	0.720908
PIK3CD-AS2	0.808021	0.332284	0.291173	0.598094	0.205391	0.597257	0.526681	0.226705	0.879074	1.03136	0.304932	0.667312	0.680824	0.339857	0.321412	0.586635	0.519307	0.568314	0.245288	0.489864	0.548742	0.500774	1.13093	0.3288	0.889034	0.905269	0.872736	0.991941	0.79894	0.497988	0.353269	0.197547	0.662011	0.601721	0.27517	0.165858	0.327592	0.670616	0.230777	0.658547	0.361438	0.242567	0.567449	4.26124	0.311699	0.235877	0.264273	0.342262	0.160261
AL121832.1	0.144907	0.0173168	0.0616458	0	0.0428154	0.0404636	0.01878	0.0341312	0.0992605	0.0481886	0.123953	0.0251165	0.0615002	0.0209318	0.0544383	0.0203815	0.0586374	0.0148087	0.188337	0.0245835	0.0774514	0	0.0364853	0.0514058	0.0308877	0.0929257	0.0305829	0.0904655	0.0955188	0.0963947	0.0512862	0	0.0309314	0.0436778	0.0349547	0.0499409	0.0138712	0.138825	0.0710678	0.214817	0	0.810726	0.96879	0.0946539	0.457541	0.0913168	0.402845	0.0713474	0.180959
PAXIP1-AS1	4.02592	3.14908	2.6814	2.32833	2.20297	4.33794	3.0575	2.4953	3.16089	3.64144	3.37607	3.4796	2.66372	2.40476	3.24415	2.49806	3.18818	2.40185	6.54087	2.1371	4.42524	2.61585	4.56149	2.77919	4.20324	4.74989	2.44256	3.27119	3.72964	2.40833	2.91977	1.76781	3.94314	3.4258	3.01363	2.96846	3.53661	3.54335	3.8422	4.06078	2.03928	7.20195	5.95188	5.66979	9.25452	1.16411	6.15981	3.52856	6.13682
AC139795.2	0.764671	0.520869	0.741694	0.594306	0.364323	0.720649	0.639208	0.83751	0.851169	0.724728	1.61344	1.13321	0.803225	0.646171	0.9049	0.621117	1.04432	0.937744	0.666467	0.554582	1.09126	0.993626	0.418758	0.461155	1.18578	1.32399	0.814996	0.685388	0.865288	1.37342	0.852506	0.550874	1.17522	0.645364	0.820826	0.928969	0.516048	0.629349	0.967561	1.73962	0.51687	0.884544	2.90914	0.861615	1.17007	0.840274	0.24801	1.34128	0.544303
ABALON	0.222805	0.277469	0.152654	0.147559	0.187101	0.191559	0.259881	0.186439	0.144588	0.245678	0.240741	0.173783	0.212762	0.137206	0.237892	0.192976	0.042707	0.291209	0.306617	0.170095	0.191793	0.210033	0.106292	0.14976	0.168722	0.175968	0.0742475	0.197664	0.170057	0.128712	0.149412	0.146214	0.101376	0.190869	0.0933472	0.109119	0.242466	0.165451	0.30021	0.168491	0.178345	0.406946	0.470395	0.827264	1.05098	0.764844	0.652003	0.51964	2.87317
AP000786.1	0.038409	0.4131	0.0882353	0.199011	0.204276	0.193055	0.224003	0.0814214	0.0789301	0.057478	0.52568	0.239666	0.0366778	0.0249668	0.0432883	0.218794	0	0.176634	0.0528573	0.11729	0.332575	0.40467	0.0435186	0.0408769	1.10526	0	0.0486378	0.339129	0.126591	0.498233	0.407818	0.127708	0.110682	0.20839	0.166772	0.178704	0.0661808	0.210746	0	0.867232	0.162263	0.130677	0.256788	1.0161	0.0839602	0.29953	0	0.255303	2.50377
AC004687.1	0.590506	0.295398	0.75714	0.467585	1.11381	0.75927	1.21736	0.145556	3.00549	0.205506	0.798791	0.610539	1.6261	0.499889	0.232158	1.68623	0.625165	0.151568	0.37797	0.618551	1.59865	1.21536	0.37343	0.833058	2.1998	0.634068	0.460832	1.17945	0.959538	1.21956	0.481175	0.741985	1.87313	0.943763	0.586335	0.0745425	0.31944	0.344456	0.242461	0.986582	0.800612	0.252299	1.33783	1.37245	0.510323	0.963842	0.41995	0.578111	1.72865
AC069281.2	0.735235	0.327213	0.850334	0.716866	0.869705	1.10865	1.35439	1.05876	0.953429	0.409751	1.05832	0.783079	0.798936	0.675681	0.914355	0.763826	0.72943	0.293812	0.980406	0.731623	1.94158	0.876133	0.42514	0.545034	0.763603	1.13548	0.539359	0.858775	0.802176	1.03215	1.01216	0.573222	0.9936	0.852833	0.645816	0.790322	0.629056	0.806829	0.872869	1.4363	0.586942	0.696956	0.547242	1.11784	0.864555	0.816015	1.71975	1.60094	1.69827
SNHG7	6.76403	4.32517	1.87204	3.37582	2.21936	5.35655	3.70818	2.72185	4.3853	5.30319	3.21148	6.41348	3.62438	2.94788	2.78421	4.02764	2.95533	6.22123	6.17736	2.3251	2.65837	3.58217	5.59223	4.60231	2.80805	8.02709	3.14779	4.05652	5.44385	1.93717	2.56847	1.1228	5.6191	3.14878	1.86207	3.22593	5.20793	2.80595	3.87652	5.30797	1.06751	3.08936	6.55834	14.3419	8.76821	3.89599	23.6159	11.1632	12.0181
SNHG15	2.36802	3.63274	2.30061	1.40858	1.18375	2.81412	1.78428	2.1597	2.18792	1.95955	2.92063	1.85655	2.02756	1.49154	2.9102	1.82025	2.09474	1.0299	1.56203	1.11178	2.91402	2.29505	5.69192	2.20759	2.26554	2.61334	1.4722	2.55397	1.72227	2.00875	1.63072	1.40381	2.21584	1.25601	1.71808	3.30717	1.4286	1.71226	1.96082	3.5607	3.55696	4.1303	18.1868	11.3132	9.1623	2.46831	12.9451	4.25701	12.09
KMT2E-AS1	3.4565	3.22841	2.32177	2.10963	2.25758	4.03855	2.29877	2.44242	3.23999	2.45015	3.00855	2.6014	2.17151	1.95118	1.87945	2.32208	2.3741	1.11548	2.79562	2.80082	3.03374	2.7153	5.84013	2.67827	2.99557	2.72989	1.84295	2.53107	2.43832	2.29933	3.41249	2.46992	2.79593	3.70134	2.8963	2.70383	2.14197	2.44791	3.02459	3.79639	2.86924	1.56798	3.04063	1.8716	2.91625	2.42898	3.79309	2.98946	2.38541
AC004130.2	1.54416	0.910757	1.44945	2.00944	0.761647	3.09831	1.62682	0.844747	1.74016	2.0499	1.76827	2.64194	1.73618	2.03987	2.55435	2.06506	2.04086	0.801753	2.65629	1.04576	1.67731	1.20706	3.78136	1.7494	2.07841	3.27737	1.51385	2.279	2.10141	0.497035	1.00489	1.11795	2.27273	1.93684	1.38781	0.424888	2.59631	2.34266	1.93482	2.24938	0.589218	2.03366	4.25792	2.04985	3.53879	0.688621	3.32347	1.37957	0.615826
AC145207.8	0.039637	0.127892	0.273169	0.264052	0.395263	0.0996136	0.508562	0.546159	0.285087	0.296578	0.406865	0.123664	0.264953	0.20612	0.223361	0.0501754	0.144354	0.0364562	0.0545472	0.06052	0.838952	0.584652	0.08982	0.0843675	0.266139	0.0915062	0.100386	0.222709	0.365788	0.514162	0.336686	0.263583	0.41881	0.250895	0.258156	0.307363	0.307335	0.155345	0.209947	0.528839	0.100471	0.134855	0.719279	0.34953	1.03973	0.281006	0.110192	0.614753	0.356389
SP2-AS1	0.440846	0.86294	0.222802	0.31326	0.181708	0.354532	0.555343	0.420538	0.298958	0.686102	0.339389	0.433252	0.227327	0.269367	0.317983	0.295769	0.385325	0.616314	0.18807	0.127891	0.373236	0.445889	0.349645	0.281503	0.30446	0.54958	0.301455	0.205236	0.325466	0.492676	0.439996	0.219869	0.381113	0.239184	0.267981	0.444407	0.326629	0.255709	0.389174	0.316712	0.320334	0.257978	1.63366	0.23325	1.34913	0.381295	0.0735339	0.556755	0.436017
AC024896.1	3.04662	2.69295	2.67485	2.55319	2.04869	2.83823	2.78774	2.78379	2.01496	3.35388	2.77832	2.43093	2.30738	1.98038	2.85151	2.66529	3.53909	3.16449	2.07826	1.35008	1.38133	2.77635	1.16056	3.82936	2.56963	3.31461	1.93453	0.449737	2.19292	3.17978	0.994619	2.15406	2.54804	1.11623	2.32511	3.10246	2.225	2.0724	2.36493	2.46189	2.41882	1.92415	0.953207	1.62122	4.7269	2.98538	1.09522	1.91063	6.73022
KIAA1671-AS1	0.466367	0.978102	0.392833	0.448763	0.248034	0.966939	0.40798	0.642608	0.287513	0.418742	0.698126	0.618385	0.445346	0.682087	0.919819	0.531324	0.594462	0.407495	0.3209	0.302631	0.8525	1.35123	0.63409	0.471515	0.827578	0.942074	0.487217	0.56151	0.537979	0.814369	0.44566	0.794707	0.895944	0.358459	0.438742	0.524379	0.582592	0.840781	1.1116	0.526501	0.433448	0.238004	0.712673	0.54834	0.5607	0.942295	0.324128	1.73079	0.681404
NCK1-DT	2.03011	1.86433	1.23169	1.39865	1.06932	2.72759	0.874316	0.96002	1.86129	1.93965	1.3091	1.69307	1.38685	1.14706	0.792003	1.21574	1.99055	0.962328	0.719935	1.19219	1.69773	1.39851	2.40635	1.26309	1.67766	2.61375	1.24583	1.66712	1.69848	1.16868	0.911955	0.882697	1.69504	1.14381	1.39002	1.06564	1.56065	0.93029	1.44752	2.00339	1.46459	1.24325	2.35655	1.28528	2.08232	1.1514	0.9551	2.24901	1.15839
AC073957.3	0.392951	0.174024	0.89765	0.488841	0.665163	0.535265	0.731804	0.944996	0.563221	0.2619	1.16657	0.90145	0.476144	0.485098	1.24673	0.522505	1.04626	0.258155	0.377173	0.632751	1.37878	0.643622	0.370398	0.495513	0.807684	0.697528	0.570775	1.19538	0.835839	0.945647	1.19207	0.370553	1.12918	0.719617	0.616522	1.05497	0.517764	0.641904	0.889094	1.4471	0.223202	0.390964	5.90076	2.49452	1.36425	0.189623	0.468177	0.735291	1.33606
OLMALINC	2.06448	2.31449	3.75124	2.31808	1.9424	2.31937	2.47945	1.72459	2.63357	1.66254	3.12035	2.53137	2.50605	1.89353	2.45491	1.54477	1.54515	1.80226	1.61917	0.934964	2.65108	3.28108	3.01311	2.17851	2.77739	1.90845	2.25426	2.30309	3.3906	3.02889	1.90409	1.01801	1.91583	2.09623	1.65226	2.58448	2.28355	1.34395	6.96566	3.32185	1.47824	1.63692	6.40822	4.91128	3.93918	0.961269	1.94553	6.36702	3.59843
CD44-AS1	0.114049	0.122663	0.203778	0.140698	0.0252735	0.143311	0.0443426	0.161178	0.117185	0.0568905	0.552826	0.207564	0.145212	0.0741349	0.942608	0.0481239	0.276905	0	0.0261585	0	0.21945	0.12016	0.0861476	0.202295	0.0729309	0.17553	0.072211	0.0305148	0.175416	0.417272	0.201825	0.0948022	0.438204	0.0687534	0.0550224	0.147398	0.0655044	0.148994	0.302044	0.35115	0.128484	0.0776048	1.01665	0.446986	1.49584	0.242565	0	1.30558	0.854545
AC006333.1	7.70788	6.65491	5.1859	4.98135	7.1598	8.3095	4.07984	4.00037	4.60987	5.07523	3.59222	5.61395	6.70056	5.30748	3.71446	5.11411	4.72374	2.50327	3.26999	8.87125	5.36994	2.86751	8.73327	5.70259	5.81275	4.93336	5.36496	6.06744	6.32126	3.37349	6.43436	6.12429	4.8406	6.9507	5.4856	3.20698	6.2467	7.73343	4.77718	6.03394	4.95853	3.11796	2.18312	2.18755	5.15929	1.00245	1.30046	1.68424	2.10302
MEG3	0.508042	0.430739	0.446468	0.321581	0.446882	0.613497	1.27761	0.970476	0.777926	0.656501	2.3	0.730711	0.604064	0.301723	2.12764	0.433521	0.618465	0.965784	0.443056	0.281977	1.74681	2.65992	0.359166	0.703342	1.22304	1.7691	0.426504	0.653148	0.781717	1.29771	0.897042	0.175274	0.655203	0.496513	0.437292	1.66582	0.359663	0.383803	1.53662	1.62378	0.455562	0.285995	0.436567	1.28952	1.35803	2.62557	0.145565	1.19149	0.973398
AC016746.1	0.026854	0	0.0616904	0.0198772	0.0714106	0.033744	0.0626453	0.142316	0	0.0401862	0.0918834	0.209455	0.0512871	0.0698229	0.0605307	0.0509905	0.244499	0	0.0184778	0	0.0775074	0	0	0.0285794	0.0257584	0.0309976	0.0850138	0.0431099	0.0354029	0.187569	0.199591	0	0.103179	0.0728489	0.0194333	0.0624712	0.0462708	0.0420984	0.118532	0.192924	0.0680686	0.0182728	0.0512958	0.236806	0.117403	0	0	0	0.0603632
SBF2-AS1	1.07173	0.748337	0.678889	0.922048	1.33173	1.77682	0.988282	0.5769	0.737977	0.713741	0.566375	1.25608	0.680499	0.787839	0.512243	1.02284	0.745891	0.479963	0.833968	0.745368	0.707194	0.555712	1.22067	0.91367	1.02263	1.66459	0.728314	0.896284	1.10962	0.520706	0.822179	0.424445	0.991734	1.19745	0.783699	0.691833	0.778303	0.70812	0.792557	1.02507	0.573662	0.782715	0.825311	0.478315	1.03032	0.381891	1.15434	1.24946	1.43788
MKLN1-AS	0.93701	0.910539	0.522403	1.12553	0.568286	0.960529	0.70945	0.618547	0.996554	1.00861	1.06166	1.12192	0.7221	1.00979	0.666974	0.827173	1.15247	0.695502	1.6571	0.903587	0.56145	0.770722	0.92197	0.892245	0.528232	0.996205	0.733786	0.824685	0.861463	0.672526	0.663264	0.60124	1.1448	1.19663	0.981435	0.560883	1.06926	0.747352	1.12468	0.539882	0.805591	1.11298	1.95471	1.18385	2.13809	0.559404	0.616953	0.746664	0.498847
WAC-AS1	5.94477	4.30601	4.59867	6.1795	6.31633	6.76496	6.26185	5.6902	5.86669	5.63954	8.36715	7.63533	6.76295	5.02747	7.57164	7.20856	9.84481	6.47199	5.67662	4.84521	7.39725	7.63739	5.38677	8.68312	6.40047	8.77014	7.20627	7.43754	6.3228	6.38583	7.68875	6.60551	7.02133	5.10135	6.41463	4.86267	7.46026	6.66273	5.6563	6.07784	4.97162	5.7581	11.0948	4.01194	6.61351	4.81661	2.90902	13.1128	4.80653
ZNF674-AS1	1.42829	1.39756	1.31574	0.937977	0.628262	1.36293	1.12734	1.55941	0.849638	1.34993	1.21257	1.35694	0.830651	0.739945	3.07422	0.856434	1.38842	0.809932	0.657651	0.58209	3.8951	0.995668	3.21225	2.45723	1.39062	1.12804	0.754741	1.5171	1.01228	1.10371	1.65335	0.607014	0.83555	0.679759	0.893716	1.31574	0.693896	1.2879	1.40308	2.4027	1.07069	1.67338	3.92831	2.55688	3.47429	0.799406	1.31361	0.987447	1.7139
Z94721.1	0.115925	0.0623406	0.221925	0.34323	0.0385339	0.509841	0.405649	0.122872	0.0595563	0.0867395	0.247906	0.361677	0.16605	0.0376772	0.587933	0.293493	0.211095	0.106623	0.358949	0.221252	0.44612	0.183205	0.0656736	0.246748	0.333588	0.133813	0.293596	0.325676	0.30566	0.404858	0.246174	0.192723	0.111353	0.209653	0.0838912	0.314628	0.199746	0.272601	0.460519	0.178463	0.048974	0.236644	1.10719	0.511131	0.760221	0.123278	0.805689	0.192638	1.82407
[truncated: 472 more columns]
