# Supplementary material for: Establishment of a novel ferroptosis-related lncRNA pair prognostic model in colon adenocarcinoma
Source: Aging (Albany NY). 2021 Oct 5;13(19):23072–95. doi: 10.18632/aging.203599 (PMC8544324; doi:10.18632/aging.203599)
Supplement: Supplementary Table 3 [file aging-13-203599-s004.xlsx]

## Sheet: Sheet1
Supplementary Table 3. The list of 165 differentially expressed ferroptosis-related lncRNAs.
gene	conMean	treatMean	logFC	pValue	fdr
AL138689.1	0.304049	1.21346	1.99675	2.27936e-06	5.29421e-06
AC004837.2	0.129296	0.73737	2.51171	3.54602e-08	1.0814e-07
MCF2L-AS1	2.47069	7.32172	1.56727	1.43369e-13	1.032e-12
AP000866.6	0.142414	0.548448	1.94526	1.89944e-06	4.46367e-06
UBE2R2-AS1	0.176368	0.633067	1.84377	2.38487e-06	5.52323e-06
AL161891.1	0.139419	0.567001	2.02393	3.28002e-17	4.0319e-16
AL138963.1	0.0932766	0.983919	3.39895	0.000231215	0.000395581
SNHG3	3.51922	10.8979	1.63072	8.19647e-20	1.87114e-18
LMO7-AS1	0.0784649	0.753973	3.26439	1.63955e-17	2.14754e-16
LINC01614	0.0151797	0.976157	6.0069	2.1866e-17	2.81789e-16
AC058791.1	0.172828	1.28641	2.89594	7.78746e-05	0.000140455
LINC01876	0.154416	0.649719	2.07299	0.00020669	0.00035515
AC020915.2	0.243234	0.714526	1.55464	6.08666e-05	0.000111799
SNHG17	2.75376	12.963	2.23492	5.4189e-23	5.41212e-21
SNHG1	4.04236	15.3289	1.92299	1.64418e-23	2.1895e-21
LINC01703	0.27842	0.96343	1.79092	7.00345e-15	6.21751e-14
ZDHHC20-IT1	0.117846	0.577199	2.29217	1.83026e-10	7.94773e-10
B4GALT1-AS1	3.44282	1.1472	-1.58547	8.50097e-22	3.77349e-20
LINC02487	0.307977	1.16859	1.92388	5.43039e-12	3.05555e-11
LINC01705	0.00541994	1.30118	7.90733	1.97635e-20	6.07347e-19
AC124319.1	0.119196	1.80003	3.91661	1.44397e-18	2.30746e-17
C2orf27A	0.281044	1.12022	1.99491	4.54762e-18	6.48848e-17
AC026368.1	0.0731448	0.640438	3.13023	1.52357e-15	1.48455e-14
AL117382.2	2.64952	10.9345	2.04508	6.50138e-09	2.17347e-08
AL162724.2	0.205176	0.726627	1.82435	3.29049e-05	6.40997e-05
AC112496.1	0.205386	1.00721	2.29396	0.000231704	0.000395581
ARHGEF38-IT1	0.0947616	0.732055	2.94958	2.40103e-09	8.64153e-09
LINC02195	0.0547616	0.569286	3.37792	1.17453e-11	6.05453e-11
AC123023.1	0.0224214	1.9942	6.47479	4.05899e-20	1.1058e-18
AC020907.4	0.280833	1.2169	2.11543	2.21569e-14	1.80646e-13
MHENCR	2.25888	8.47197	1.90709	3.659e-19	7.2291e-18
AL031716.1	0.318504	0.958198	1.58901	3.31652e-10	1.38738e-09
MIR17HG	0.157807	1.41804	3.16766	4.01534e-19	7.63872e-18
AC127024.4	0.405271	1.43332	1.8224	3.57693e-08	1.08668e-07
MIR4435-2HG	0.635679	1.97924	1.63858	4.52381e-22	2.25908e-20
AC000061.1	0.16934	0.951332	2.49003	9.09724e-05	0.000163341
AC007938.3	0.276722	0.793262	1.51936	5.64623e-10	2.25567e-09
LINC01748	0.0761419	1.33281	4.12964	1.76339e-14	1.46765e-13
AP005233.2	0.180156	2.66018	3.88421	7.41344e-16	7.58076e-15
AL133330.1	0.125802	0.727208	2.53121	6.87828e-13	4.55855e-12
AC010973.2	0.269373	0.863312	1.68028	7.90266e-16	7.89278e-15
TSPOAP1-AS1	0.330673	1.00258	1.60025	3.15915e-10	1.32851e-09
SCAT2	0.183829	0.853111	2.21437	3.71763e-14	2.97038e-13
AC093788.1	0.250891	0.715695	1.51229	1.0866e-07	3.14562e-07
AC007128.1	0.0178404	0.618306	5.1151	3.81923e-22	2.05677e-20
AL021578.1	0.141788	0.878463	2.63125	3.59622e-12	2.06718e-11
AP003352.1	0.829257	2.42224	1.54645	6.86264e-19	1.14234e-17
AC105460.1	0.0107264	4.37763	8.67284	3.7754e-05	7.24289e-05
AC087222.1	0.124541	0.580277	2.22012	4.11817e-07	1.08595e-06
AL445222.2	0.183978	0.689897	1.90685	1.54204e-12	9.40529e-12
MALAT1	7.99496	129.76	4.02061	2.27954e-08	7.08698e-08
FAM222A-AS1	0.0797886	1.06797	3.74254	1.97845e-22	1.43708e-20
AC092535.5	0.763944	2.26359	1.56707	9.35916e-12	4.98531e-11
AC243967.2	0.0937091	0.637076	2.7652	4.51982e-07	1.18017e-06
AC127024.5	0.672906	2.21204	1.7169	1.43291e-12	8.94447e-12
PPP1R14B-AS1	0.754411	3.27018	2.11595	2.64574e-21	1.00664e-19
RHPN1-AS1	0.194212	0.82882	2.09343	2.99561e-16	3.27876e-15
AC016394.3	0.47316	1.63097	1.78533	3.46698e-17	4.19715e-16
MNX1-AS1	1.07249	4.30467	2.00494	4.15195e-20	1.1058e-18
SNHG16	2.10106	6.04166	1.52383	6.55216e-25	1.12008e-22
AC073487.1	0.216865	0.640531	1.56247	2.43818e-05	4.84603e-05
AP001160.1	0.203777	0.753794	1.88718	7.5061e-18	1.0165e-16
AC016831.4	0.0505681	0.980413	4.27709	6.33969e-06	1.39543e-05
AC016831.1	0.0909804	0.917012	3.33331	1.76114e-22	1.40715e-20
AC090116.1	0.0485972	1.10134	4.50225	9.28811e-12	4.98067e-11
FTX	0.193368	1.22364	2.66175	4.82404e-06	1.07365e-05
AP002336.2	0.165197	0.569558	1.78566	9.65256e-11	4.35729e-10
AC090739.1	0.35768	1.20468	1.7519	0.000180753	0.000314644
MIR181A2HG	0.136288	0.663733	2.28395	9.03851e-09	2.95974e-08
LINC01311	0.24907	0.832007	1.74004	1.06297e-17	1.41553e-16
AC007608.2	0.00136951	0.61879	8.81964	1.61959e-07	4.55652e-07
MBNL1-AS1	2.81561	0.52934	-2.41118	1.90363e-19	4.00264e-18
AC011676.1	0.0875246	0.655424	2.90467	2.59204e-16	2.87644e-15
LINC02418	0.00682418	4.29544	9.29793	7.12458e-20	1.77892e-18
AL355802.3	0.170012	0.57344	1.754	1.72992e-12	1.04713e-11
AL117379.1	0.477144	1.62315	1.7663	3.159e-10	1.32851e-09
AC121761.1	0.268384	0.998994	1.89618	4.54087e-14	3.52248e-13
AP005899.1	0.223091	0.650341	1.54356	0.000146248	0.000256255
AP002907.1	0.20009	0.685419	1.77634	9.4767e-08	2.77358e-07
LINC-PINT	0.484135	1.63005	1.75143	1.97118e-12	1.17535e-11
AC025857.2	1.26942	4.84626	1.9327	4.42746e-19	8.22683e-18
AF117829.1	0.208631	0.660497	1.6626	1.0398e-12	6.64643e-12
PRR7-AS1	0.0947012	0.616814	2.70338	9.94666e-22	4.18283e-20
AC245100.7	0.188107	0.626891	1.73666	1.05648e-06	2.5566e-06
AC093732.1	0.0298394	0.582391	4.2867	2.22467e-13	1.57302e-12
AL078587.1	0.106765	0.725684	2.7649	7.30251e-11	3.39227e-10
AC131971.1	0.0533653	0.746887	3.80692	4.74598e-05	8.98587e-05
AL354836.1	0.917089	2.85018	1.63592	3.45701e-16	3.68286e-15
AC015813.1	0.944762	2.85942	1.5977	3.15915e-10	1.32851e-09
AC124067.4	3.33105	9.78641	1.5548	2.37436e-11	1.15678e-10
SCARNA9	0.469788	7.01514	3.90039	2.33712e-12	1.38323e-11
AL442067.1	0.115027	0.790352	2.78052	4.69351e-08	1.41514e-07
AC103591.3	0.349667	1.66135	2.24831	4.73848e-07	1.22923e-06
SLC12A9-AS1	0.643154	3.0292	2.2357	7.79779e-20	1.87114e-18
PVT1	0.387064	3.01874	2.9633	3.67267e-26	2.93446e-23
LINC01811	0.00560698	0.825326	7.2016	1.84289e-19	3.97965e-18
N4BP2L2-IT2	0.2588	0.909036	1.8125	5.92723e-05	0.000109373
AC078860.2	0.0812168	0.734931	3.17776	3.28523e-12	1.9021e-11
AC015922.2	8.15836	2.54758	-1.67915	1.34537e-21	5.37476e-20
AL136115.2	0.0553186	0.76758	3.79448	3.37988e-05	6.55468e-05
LINC02163	0.0029264	1.31859	8.81566	3.11843e-21	1.13256e-19
LINC02595	0.0473136	1.03261	4.4479	8.038e-20	1.87114e-18
AL139089.1	0.388858	1.46635	1.91492	5.18896e-15	4.71134e-14
HM13-IT1	0.5313	1.56709	1.56049	1.61522e-11	8.1681e-11
FENDRR	5.78278	1.6954	-1.77014	2.43459e-20	7.20458e-19
Z68871.1	0.223311	0.64344	1.52675	1.92599e-08	6.03478e-08
LINC01473	0.197178	0.804524	2.02864	1.02875e-09	3.99014e-09
CASC19	0.126996	4.33616	5.09357	5.28817e-25	1.12008e-22
VPS9D1-AS1	1.2813	7.88477	2.62146	3.86127e-22	2.05677e-20
LINC00513	0.656762	2.25485	1.77959	9.19432e-09	2.99847e-08
AL031600.1	0.264145	0.88295	1.741	2.1566e-11	1.06365e-10
AC092168.2	0.0384078	0.811148	4.40049	6.51678e-07	1.63739e-06
AC026356.1	0.18241	0.8166	2.16245	3.01732e-17	3.80291e-16
AL121832.3	0.227277	0.798073	1.81207	4.60059e-15	4.22514e-14
AL355312.3	0.0985299	0.567783	2.52671	6.44422e-07	1.62427e-06
AL137782.1	0.240373	0.81682	1.76475	7.39199e-14	5.62495e-13
AL596223.2	0.121089	0.562141	2.21487	6.11894e-11	2.85908e-10
AL353804.2	0.0611103	0.571335	3.22485	9.26911e-06	1.94895e-05
AL139349.1	0.324389	1.04585	1.68888	1.46034e-08	4.59374e-08
AL161729.4	0.164394	0.776028	2.23895	6.77652e-12	3.7341e-11
AC073611.1	0.40242	1.1526	1.51812	7.40742e-21	2.57327e-19
AL356299.3	0.105481	0.811803	2.94414	3.70955e-19	7.2291e-18
AL035071.2	0.0797816	0.567571	2.83067	1.09652e-05	2.28157e-05
AC245884.8	0.373432	1.18495	1.66591	5.30792e-12	3.02931e-11
AL133243.2	0.40495	1.30789	1.69143	1.65913e-05	3.35607e-05
AL049539.1	0.0482308	0.689998	3.83857	3.91903e-14	3.1003e-13
AP001469.3	0.367466	1.07011	1.54207	2.87787e-19	5.89594e-18
AC108134.3	0.403313	2.33904	2.53594	4.59616e-07	1.1962e-06
SNHG25	0.967888	29.5058	4.93002	5.12529e-20	1.321e-18
SNHG22	0.175242	0.8181	2.22293	6.19102e-07	1.57536e-06
Z83843.1	0.615517	3.43919	2.4822	5.48207e-05	0.000101864
AC048344.4	0.0740431	0.541205	2.86974	3.05036e-16	3.29356e-15
SNHG4	0.915585	3.55664	1.95775	7.56223e-19	1.23311e-17
AC104695.4	0.254618	1.90152	2.90075	3.94178e-05	7.53464e-05
TFAP2A-AS1	0.0401832	0.593565	3.88474	2.38581e-15	2.24266e-14
PLAC4	0.0109833	0.736014	6.06635	5.1242e-19	9.0983e-18
AL109614.1	0.294118	1.37291	2.22276	5.56577e-08	1.67182e-07
GK-AS1	0.247654	1.09104	2.13931	0.000214383	0.00036758
DLEU2	0.342306	1.23271	1.84847	6.27804e-13	4.25098e-12
GK-IT1	0.0628423	0.564309	3.16668	1.34855e-05	2.79142e-05
PCAT14	0.00821494	0.553503	6.0742	5.34449e-05	0.00010024
AL121832.2	1.13798	3.31492	1.54249	9.42829e-16	9.30025e-15
CHN2-AS1	0.0321503	0.763152	4.56907	1.8265e-12	1.09727e-11
LINC01186	0.117717	0.570284	2.27636	5.53071e-16	5.73901e-15
LINC01315	1.03085	4.15419	2.01073	6.18939e-17	7.38107e-16
AL031275.1	0.0878143	0.6094	2.79486	2.69643e-05	5.31625e-05
LINC02441	15.032	2.97125	-2.3389	3.38257e-22	2.05677e-20
DTNB-AS1	1.95305	0.50151	-1.96138	1.71905e-15	1.65485e-14
AL080317.1	0.149475	0.566942	1.92329	5.28961e-10	2.12382e-09
LINC02362	1.45098	0.496617	-1.54682	3.51066e-13	2.41812e-12
AC079684.2	0.283367	0.993901	1.81043	2.64146e-11	1.2791e-10
AP001628.1	0.211334	0.818741	1.95388	8.09638e-09	2.66214e-08
AC084117.1	0.237641	0.730321	1.61975	6.10086e-05	0.000111802
FIRRE	0.0107016	0.677975	5.98534	4.03958e-20	1.1058e-18
Z82243.1	0.190426	0.909277	2.25549	7.86445e-12	4.27462e-11
AP001429.1	0.0566364	1.09295	4.27035	3.54572e-07	9.5068e-07
FOXP4-AS1	0.499237	2.84456	2.51041	3.54818e-22	2.05677e-20
AL031673.1	0.403463	1.25317	1.63507	3.62163e-09	1.26362e-08
TMEM147-AS1	0.626374	2.2124	1.82051	1.20921e-20	3.86463e-19
AC145423.2	0.112819	0.599458	2.40966	9.59131e-14	6.96678e-13
MAFG-DT	0.374725	3.3122	3.14389	7.00923e-25	1.12008e-22
AL121832.1	0.0573582	0.925642	4.01238	2.41635e-18	3.64275e-17
ABALON	0.18147	0.786967	2.11657	3.67338e-23	4.1929e-21
SNHG15	2.19805	8.44548	1.94195	3.36848e-25	1.12008e-22
CD44-AS1	0.170171	1.18458	2.79932	1.82261e-13	1.30023e-12
