# Supplementary material for: Establishment of a novel ferroptosis-related lncRNA pair prognostic model in colon adenocarcinoma
Source: Aging (Albany NY). 2021 Oct 5;13(19):23072–95. doi: 10.18632/aging.203599 (PMC8544324; doi:10.18632/aging.203599)
Supplement: Supplementary Table 5 [file aging-13-203599-s006.xlsx]

## Sheet: Sheet1
Supplementary Table 5. The list of 148 prognostic-associated lncRNA pairs.
lncRNA pair	HR	HR.95L	HR.95H	pvalue
AL138689.1|LINC00513	1.76053	1.14815	2.69953	0.00950283
AC004837.2|AL136115.2	0.55369	0.361887	0.847148	0.00644066
AP000866.6|GK-AS1	1.84335	1.22625	2.77102	0.00327532
LMO7-AS1|LINC02418	1.76351	1.1497	2.70503	0.00934685
LMO7-AS1|LINC00513	1.93444	1.24564	3.00413	0.00330342
LINC01614|LINC02418	1.81816	1.18169	2.79743	0.00654071
LINC01614|LINC00513	1.89864	1.23732	2.91342	0.00333897
LINC01614|AC145423.2	1.77064	1.17444	2.6695	0.00638029
AC058791.1|AL136115.2	0.568905	0.378118	0.855958	0.00680587
AC058791.1|SNHG22	0.550466	0.350104	0.865496	0.00972102
LINC01876|AC123023.1	2.2821	1.45423	3.58128	0.000332294
LINC01876|AC000061.1	1.89398	1.23113	2.91371	0.00365962
LINC01876|AC121761.1	1.93105	1.26682	2.94356	0.00221659
LINC01876|AL121832.1	1.73648	1.1581	2.60374	0.00758215
LINC01703|B4GALT1-AS1	1.8323	1.21763	2.75725	0.00368035
LINC01703|FENDRR	1.94986	1.2954	2.93496	0.00137215
LINC01703|LINC00513	1.80631	1.20423	2.7094	0.00425866
B4GALT1-AS1|AC010973.2	0.560192	0.373125	0.841043	0.00519137
B4GALT1-AS1|SCAT2	0.490245	0.324022	0.741739	0.000740765
B4GALT1-AS1|AC007128.1	0.463056	0.302027	0.709941	0.000413709
B4GALT1-AS1|AC245884.8	0.526528	0.349776	0.792597	0.00211343
B4GALT1-AS1|AP001469.3	0.518603	0.343001	0.784107	0.00185179
B4GALT1-AS1|AC104695.4	0.547294	0.35135	0.852514	0.00768498
B4GALT1-AS1|AL109614.1	0.524725	0.346409	0.794831	0.00233627
LINC02487|AC010973.2	0.465428	0.309339	0.700279	0.000243243
LINC02487|PRR7-AS1	0.543282	0.349943	0.84344	0.00655488
LINC02487|AC245884.8	0.575126	0.380205	0.86998	0.00880427
LINC02487|AP001628.1	0.558011	0.371284	0.838647	0.00500834
AC026368.1|AC090116.1	0.567337	0.369735	0.870547	0.00947099
AC026368.1|AL161729.4	0.523436	0.323259	0.847571	0.00847575
ARHGEF38-IT1|AC090116.1	0.462546	0.284426	0.752212	0.00188601
ARHGEF38-IT1|AL136115.2	0.511007	0.336981	0.774903	0.00157531
LINC02195|AC011676.1	0.534829	0.344901	0.829347	0.00517465
LINC02195|AC048344.4	0.522114	0.338087	0.806312	0.00337994
AC123023.1|AF117829.1	0.541835	0.344767	0.851546	0.00789196
AC123023.1|PRR7-AS1	0.527806	0.344198	0.809357	0.00339317
AC123023.1|AL161729.4	0.527118	0.345381	0.804483	0.00299222
AC123023.1|AP001628.1	0.550859	0.362117	0.837976	0.00533924
AC123023.1|FIRRE	0.481983	0.313605	0.740766	0.000873425
AC020907.4|AC010973.2	0.580981	0.387645	0.870742	0.00852843
MHENCR|AC025857.2	2.30793	1.22805	4.3374	0.00937375
AL031716.1|AC010973.2	0.477334	0.309306	0.736643	0.000835777
AL031716.1|AL117379.1	0.501837	0.305427	0.824552	0.0065005
AL031716.1|AL161729.4	0.538484	0.358951	0.807812	0.00277735
AL031716.1|AC245884.8	0.552658	0.354932	0.860532	0.00867016
MIR17HG|AL161729.4	0.501786	0.334256	0.753284	0.000878622
AC127024.4|AL355802.3	2.26278	1.3207	3.87688	0.00295378
AC127024.4|FENDRR	2.26849	1.51098	3.40578	7.78948e-05
AC127024.4|AC108134.3	1.82536	1.21508	2.74217	0.00375369
AC000061.1|AC007938.3	0.500415	0.29906	0.837341	0.00839278
AC000061.1|AL445222.2	0.514789	0.316733	0.83669	0.00737381
AC000061.1|AL161729.4	0.505633	0.305336	0.837322	0.00805232
AC007938.3|AP002336.2	2.11778	1.2349	3.63185	0.00639789
AC007938.3|LINC00513	1.8418	1.20096	2.8246	0.00512146
LINC01748|FENDRR	1.83288	1.22246	2.74811	0.00336817
LINC01748|LINC00513	2.22504	1.47931	3.3467	0.000122975
LINC01748|AC108134.3	1.73089	1.15425	2.5956	0.00795736
AP005233.2|AC025857.2	1.76745	1.17219	2.66498	0.00656339
AP005233.2|SLC12A9-AS1	1.71325	1.14133	2.57176	0.00938247
AP005233.2|LINC00513	1.98319	1.26715	3.10387	0.00273602
AP005233.2|LINC01315	1.7723	1.17816	2.66607	0.00601517
AC010973.2|AP002336.2	2.483	1.24762	4.94162	0.00959685
AC010973.2|LINC01311	1.82014	1.19911	2.76282	0.00491212
AC010973.2|LINC02418	1.76669	1.16403	2.68138	0.00750713
AC010973.2|SCARNA9	1.70973	1.13763	2.56953	0.00987063
AC010973.2|AC103591.3	2.09696	1.34052	3.28027	0.00117999
AC010973.2|FENDRR	1.75281	1.15982	2.64897	0.00772954
AC010973.2|LINC00513	2.53952	1.69176	3.8121	6.89731e-06
AC010973.2|AC026356.1	2.19693	1.38812	3.47703	0.000779499
AC010973.2|AL356299.3	2.1278	1.2835	3.52747	0.00341471
AC010973.2|Z83843.1	1.8357	1.22211	2.75734	0.0034306
AC010973.2|DLEU2	1.81584	1.20009	2.74753	0.00475532
AC010973.2|AL031673.1	1.90134	1.26028	2.86849	0.0021947
TSPOAP1-AS1|AC245100.7	0.559713	0.367055	0.853492	0.00702011
TSPOAP1-AS1|LINC00513	1.91808	1.27428	2.88713	0.00179839
TSPOAP1-AS1|AL161729.4	0.534384	0.356224	0.801647	0.00245823
AC007128.1|ABALON	1.7656	1.17718	2.64816	0.00598406
AL021578.1|AL133243.2	1.778	1.16584	2.71158	0.00752752
AL445222.2|AL137782.1	2.29146	1.48263	3.54153	0.000189318
FAM222A-AS1|AL031600.1	0.551819	0.365734	0.832585	0.00461094
FAM222A-AS1|AP001628.1	0.568784	0.379112	0.85335	0.00640767
AC092535.5|FENDRR	2.28227	1.44373	3.60787	0.000412952
AC092535.5|SNHG4	1.79375	1.18274	2.7204	0.00596289
RHPN1-AS1|LINC00513	1.74319	1.14626	2.65099	0.00937286
AP001160.1|LINC00513	2.11481	1.40507	3.18306	0.000330439
AC016831.4|AC011676.1	0.356936	0.165013	0.772078	0.00886863
AC016831.4|AL136115.2	0.559783	0.363943	0.861004	0.00826047
AC016831.4|AC104695.4	0.425408	0.231995	0.780067	0.00573017
AC090116.1|AP002336.2	1.81152	1.18889	2.76022	0.00568924
AC090116.1|AL353804.2	1.93116	1.17804	3.16576	0.00906242
AC090116.1|ABALON	1.75341	1.16872	2.63061	0.0066622
AP002336.2|AC093732.1	0.526545	0.350138	0.791831	0.00206177
AP002336.2|AL031600.1	0.485741	0.286937	0.822286	0.00717779
MIR181A2HG|AC103591.3	1.84371	1.22102	2.78396	0.00361773
MIR181A2HG|LINC01811	1.75964	1.15967	2.67002	0.0079007
LINC01311|LINC00513	1.99969	1.32941	3.00793	0.000878143
AC011676.1|AC092168.2	2.96104	1.3701	6.39938	0.0057664
LINC02418|LINC-PINT	0.574036	0.379732	0.867762	0.00847064
LINC02418|AC245100.7	0.554438	0.361343	0.85072	0.00693191
LINC02418|LINC02595	0.519056	0.33935	0.793929	0.00249288
LINC02418|AC048344.4	0.537434	0.348861	0.827938	0.00485722
LINC02418|TMEM147-AS1	0.58462	0.389936	0.876504	0.0093796
AL117379.1|LINC00513	1.92068	1.27669	2.8895	0.00173481
AC121761.1|AC104695.4	0.565908	0.37466	0.854782	0.00681687
AC121761.1|AL109614.1	0.54741	0.363765	0.823769	0.00385625
AC121761.1|CD44-AS1	0.581828	0.388045	0.872382	0.00877762
AP005899.1|GK-AS1	1.74918	1.15924	2.63936	0.007723
AP002907.1|LINC01811	1.79067	1.1706	2.73918	0.00722523
LINC-PINT|LINC00513	2.18857	1.45579	3.29021	0.000166321
AF117829.1|SNHG22	0.550248	0.364015	0.83176	0.00459975
AC245100.7|LINC01811	1.91211	1.25711	2.90838	0.00245124
AC093732.1|AL137782.1	1.73285	1.1475	2.61679	0.00894414
AC093732.1|ABALON	1.76935	1.16054	2.69754	0.00800416
AL078587.1|ABALON	1.77321	1.17939	2.66602	0.00590537
AL354836.1|SNHG4	1.73944	1.1582	2.61236	0.0076356
AC015813.1|LINC00513	1.86643	1.17338	2.96884	0.00841071
SCARNA9|AL161729.4	0.561674	0.368111	0.857017	0.00745765
SCARNA9|AC104695.4	0.562996	0.369497	0.857828	0.00750267
N4BP2L2-IT2|LINC00513	1.96955	1.26428	3.06826	0.00272881
AL136115.2|AC092168.2	1.79058	1.17546	2.72759	0.00667158
AL136115.2|LINC02362	1.89195	1.2341	2.90048	0.00344607
AL139089.1|FENDRR	1.89901	1.26066	2.86059	0.00215431
HM13-IT1|MAFG-DT	2.11118	1.26143	3.53337	0.00445759
FENDRR|AL031600.1	0.559551	0.366992	0.853145	0.00697604
FENDRR|AP001469.3	0.522507	0.347842	0.784878	0.00176744
LINC00513|AL031600.1	0.540089	0.35879	0.812999	0.00315661
LINC00513|AL139349.1	0.571752	0.380868	0.858305	0.00699404
LINC00513|AL161729.4	0.447473	0.293424	0.6824	0.000187865
LINC00513|AC245884.8	0.516785	0.344449	0.775344	0.00142626
LINC00513|AP001469.3	0.580165	0.385993	0.872014	0.00882749
LINC00513|AL109614.1	0.558754	0.365255	0.854761	0.00728567
LINC00513|AC079684.2	0.534391	0.354726	0.805056	0.00272552
LINC00513|AP001628.1	0.461446	0.304777	0.69865	0.000257718
LINC00513|CD44-AS1	0.535024	0.353692	0.80932	0.00305825
AL031600.1|GK-AS1	2.2944	1.25126	4.20716	0.00726254
AL137782.1|AL161729.4	0.52401	0.343484	0.799417	0.00271027
AL137782.1|AC245884.8	0.39254	0.222062	0.693897	0.00129444
AL137782.1|AP001469.3	0.333131	0.161123	0.688771	0.00301687
AL137782.1|AC084117.1	0.570081	0.378695	0.858188	0.00708665
AL161729.4|AL031673.1	1.75327	1.16009	2.64976	0.00770579
AP001469.3|ABALON	2.0304	1.22674	3.36057	0.00587169
AC108134.3|AC104695.4	0.52869	0.348348	0.802395	0.00275138
SNHG22|LINC02362	1.81169	1.19222	2.75302	0.00537745
AC048344.4|ABALON	1.86902	1.22236	2.85778	0.00389279
AL109614.1|ABALON	1.85682	1.22674	2.8105	0.00343019
GK-AS1|AC084117.1	0.528431	0.339367	0.822825	0.00475643
AL080317.1|ABALON	1.87856	1.20945	2.91785	0.00501002
ABALON|CD44-AS1	0.584199	0.38919	0.876918	0.00949369
