# Supplementary material for: Establishment of a novel ferroptosis-related lncRNA pair prognostic model in colon adenocarcinoma
Source: Aging (Albany NY). 2021 Oct 5;13(19):23072–95. doi: 10.18632/aging.203599 (PMC8544324; doi:10.18632/aging.203599)
Supplement: Supplementary Table 7 [file aging-13-203599-s008.xlsx]

## Sheet: Sheet1
Supplementary Table 7. Risk classification of patients according to the cut-off point.
id	futime	fustat	LMO7-AS1|LINC00513	LINC01614|AC145423.2	LINC01703|FENDRR	LINC02487|AC010973.2	LINC02195|AC048344.4	AC020907.4|AC010973.2	MHENCR|AC025857.2	AL031716.1|AL117379.1	MIR17HG|AL161729.4	AC127024.4|AL355802.3	AC010973.2|AL031673.1	AL021578.1|AL133243.2	AC016831.4|AC011676.1	AC090116.1|AL353804.2	AP002336.2|AC093732.1	AC011676.1|AC092168.2	AP005899.1|GK-AS1	LINC-PINT|LINC00513	AF117829.1|SNHG22	AC245100.7|LINC01811	AL354836.1|SNHG4	SCARNA9|AC104695.4	AL137782.1|AP001469.3	AP001469.3|ABALON	ABALON|CD44-AS1	riskScore	risk
TCGA-CK-4950	7.12055	0	0	1	0	0	1	0	0	1	1	0	1	0	1	0	0	0	0	0	0	0	0	1	0	0	1	0.0179067	low
TCGA-G4-6294	2.35068	1	0	0	0	1	0	1	1	0	1	1	0	0	0	0	0	1	0	1	1	1	0	1	0	1	0	1.71727	high
TCGA-A6-3807	2.88767	0	1	0	0	1	1	1	1	0	1	1	0	0	0	0	1	1	0	1	0	1	0	1	0	1	1	0.616068	low
TCGA-AA-3846	1.41918	0	0	0	0	1	1	1	1	0	1	1	0	1	1	0	1	0	0	1	0	0	0	1	0	1	0	0.0844764	low
TCGA-F4-6703	3.98904	0	1	1	0	0	1	0	0	0	1	1	1	0	0	1	0	1	0	1	1	1	0	0	1	0	1	1.69175	high
TCGA-AZ-4313	6.32877	0	0	1	1	1	1	0	1	1	1	1	0	0	0	0	1	1	0	0	0	0	0	1	1	1	1	0.102683	low
TCGA-F4-6461	0.926027	1	0	1	0	1	0	1	1	0	0	1	1	0	0	1	1	1	1	0	0	0	1	0	0	1	0	18.0285	high
TCGA-AA-3811	0.838356	1	0	1	1	0	0	1	1	0	1	1	1	1	0	1	1	1	1	1	0	1	1	1	0	0	1	26.6631	high
TCGA-G4-6303	5.48767	1	0	1	0	1	1	1	1	0	1	1	0	1	0	1	0	1	1	1	1	0	0	0	0	1	1	1.93263	high
TCGA-QG-A5Z2	2.60822	0	0	0	0	0	1	1	1	1	0	1	0	1	0	1	0	1	0	1	0	1	0	1	0	1	0	4.50075	high
TCGA-CA-5256	1.03836	0	0	0	0	0	0	0	1	0	0	1	0	0	0	1	1	1	1	0	1	0	0	1	1	1	1	0.715315	low
TCGA-AA-3488	0.419178	1	0	0	0	0	0	0	1	0	0	1	1	1	0	1	1	1	1	0	0	0	1	1	0	1	1	14.8013	high
TCGA-CM-5341	2.42192	0	0	1	0	1	1	0	0	0	1	0	0	0	1	1	1	1	0	0	1	0	0	1	1	1	1	0.0119297	low
TCGA-F4-6854	0.0438356	0	0	1	0	1	1	0	1	0	0	0	1	0	0	1	0	1	0	0	1	0	0	1	0	0	1	0.509978	low
TCGA-AA-3947	2.75068	0	0	1	0	1	1	1	0	0	1	1	0	0	0	1	0	1	0	1	1	0	0	0	0	1	0	0.79312	low
TCGA-CM-6162	1	0	1	1	0	1	1	1	0	1	1	0	0	0	0	1	0	1	0	1	1	1	0	0	0	0	0	0.334913	low
TCGA-AA-3662	0.50411	0	1	0	0	0	1	1	1	0	1	0	1	0	0	0	0	1	0	1	1	0	0	0	1	1	0	0.377995	low
TCGA-A6-2678	3.52329	0	0	1	0	0	1	0	1	0	1	0	0	0	1	0	1	0	1	0	1	1	0	1	0	1	1	0.0872253	low
TCGA-CM-6675	1.08767	0	0	0	0	1	0	1	1	0	0	1	0	0	0	0	0	1	1	1	1	1	1	0	0	1	0	12.2224	high
TCGA-AY-4071	0.0794521	1	1	0	0	0	1	1	1	0	1	1	1	1	0	0	0	0	0	1	0	0	1	1	0	1	0	2.95602	high
TCGA-AA-3976	2.16712	0	1	0	0	1	0	0	1	0	1	1	1	0	0	0	1	1	0	0	1	0	0	1	0	0	1	0.383727	low
TCGA-CA-5797	1.04932	0	0	0	0	1	1	1	1	1	0	0	0	0	0	1	1	1	0	0	1	0	1	1	0	1	1	0.0611525	low
TCGA-AA-A01R	2.91781	0	0	0	1	0	1	0	1	1	0	1	0	1	0	1	1	1	1	0	0	1	1	1	0	1	1	5.34318	high
TCGA-A6-5664	1.8411	0	0	0	0	1	1	1	0	0	0	1	0	0	1	1	1	1	0	0	1	1	0	1	0	0	0	0.0698687	low
TCGA-AA-A02H	0.167123	1	1	0	0	0	0	1	1	0	1	1	0	0	0	1	0	1	1	1	0	1	1	1	0	1	0	33.5178	high
TCGA-AA-3862	2.50411	0	1	0	1	1	1	1	1	1	1	0	0	0	1	0	1	0	0	1	0	0	0	1	0	1	0	0.0282856	low
TCGA-D5-7000	0.854795	0	0	0	0	0	0	1	1	1	1	1	1	0	0	1	1	1	0	0	1	0	0	0	1	0	0	0.158805	low
TCGA-CA-6716	1.01644	0	0	1	0	1	0	1	0	0	0	0	0	0	0	1	1	1	1	0	1	0	1	1	0	1	1	0.474848	low
TCGA-AA-A01G	1	0	0	0	0	0	0	1	1	0	0	1	1	0	0	1	1	0	1	1	0	0	0	1	0	1	1	2.24458	high
TCGA-D5-6535	1.26027	0	0	0	1	0	0	1	1	0	1	0	1	0	0	0	0	1	0	1	1	0	0	0	0	1	0	2.12006	high
TCGA-CK-6748	0.167123	0	0	1	0	1	0	0	0	0	0	0	0	0	0	1	0	1	0	0	1	0	0	0	1	0	1	0.203279	low
TCGA-D5-5539	1.63288	0	1	1	0	1	1	1	0	1	0	0	0	0	0	1	0	0	1	1	1	1	0	0	0	1	0	0.733426	low
TCGA-A6-4105	1.21096	1	1	0	0	1	0	1	1	0	0	1	1	1	0	1	1	1	0	0	1	1	1	0	1	0	1	2.00241	high
TCGA-G4-6307	4.5863	0	0	0	1	1	0	1	1	0	0	0	0	1	1	1	1	1	1	0	1	0	1	1	0	1	1	0.403372	low
TCGA-A6-6137	2.25753	0	1	0	0	0	1	1	1	1	1	1	0	0	0	0	1	1	0	1	1	0	0	0	0	1	1	0.175862	low
TCGA-AA-3860	2.58904	0	0	0	0	0	0	1	0	0	1	1	0	1	0	1	1	1	1	1	1	1	0	1	0	1	1	1.46111	high
TCGA-AA-3986	1.58904	0	0	0	0	0	0	1	1	0	0	1	1	0	1	1	1	0	0	0	0	1	1	1	0	1	0	2.34313	high
TCGA-CM-6165	1.33699	0	0	1	0	1	1	1	0	0	0	0	0	0	1	0	0	1	0	0	0	0	0	1	0	1	0	0.108853	low
TCGA-CM-4750	0.668493	0	0	0	0	1	0	1	1	1	1	0	0	1	0	0	1	1	1	0	0	1	1	1	0	0	1	0.229861	low
TCGA-AA-3520	2.00274	0	1	1	0	1	0	1	1	0	1	1	1	0	0	0	0	1	0	1	1	0	0	1	1	1	0	1.76958	high
TCGA-G4-6625	7.64932	0	0	0	0	1	1	1	1	0	0	1	0	0	1	1	0	1	1	0	1	0	0	1	0	1	1	0.162942	low
TCGA-DM-A28M	7.93151	0	0	0	1	1	1	1	1	1	0	0	0	0	0	1	1	1	0	1	1	0	0	1	0	1	0	0.178718	low
TCGA-D5-6920	1.03288	0	0	0	0	0	1	1	0	1	1	0	1	1	0	0	1	1	0	0	0	0	0	1	0	1	0	0.0773911	low
TCGA-DM-A288	1.16986	1	0	1	1	0	0	0	1	0	0	1	1	0	0	1	1	1	0	1	1	0	0	0	0	1	0	33.7409	high
TCGA-AA-A02O	0.0767123	0	0	0	1	0	1	1	1	0	1	1	1	1	1	1	1	1	0	0	0	0	1	1	0	1	1	0.627088	low
TCGA-AA-A02E	0.246575	1	1	0	0	0	0	1	1	0	0	0	0	1	0	1	1	1	1	1	1	1	1	1	0	1	0	14.3411	high
TCGA-AA-3710	2.24932	0	0	0	0	0	1	0	1	0	0	1	1	1	0	0	0	1	0	1	1	0	1	1	1	0	1	0.974811	low
TCGA-AZ-4614	0.471233	1	1	0	1	1	1	0	1	0	0	1	1	0	0	1	0	1	1	1	1	1	1	1	0	1	1	23.0531	high
TCGA-G4-6320	2.20274	0	0	0	0	0	0	1	1	0	1	1	1	0	0	1	1	1	1	0	1	0	1	1	0	1	0	2.75083	high
TCGA-AA-3856	0.0821918	0	0	0	1	0	1	1	1	0	0	1	0	0	0	1	0	1	1	0	1	1	0	1	0	1	1	2.15224	high
TCGA-A6-6138	1.87671	0	0	1	0	1	1	0	0	0	0	1	0	0	1	1	1	1	1	0	1	0	0	1	0	0	1	0.102146	low
TCGA-A6-2685	3.10411	0	0	1	0	1	0	1	1	1	1	0	0	0	1	0	1	0	0	0	0	1	1	1	1	0	1	0.0140754	low
TCGA-QG-A5YX	2.74795	0	0	0	0	1	0	0	1	0	1	1	0	0	0	0	1	1	0	0	1	1	0	1	0	1	0	1.05057	low
TCGA-DM-A1D8	1.04932	1	0	0	1	1	1	1	1	0	0	1	0	1	0	1	0	1	1	0	1	1	0	1	0	1	0	3.88864	high
TCGA-AM-5821	0.0767123	0	0	1	1	1	0	0	0	0	1	0	1	0	0	0	0	1	1	1	1	1	0	1	1	0	1	0.634628	low
TCGA-CK-5916	1.76164	1	1	1	0	0	1	0	0	1	1	1	0	0	0	1	1	1	1	1	1	1	0	0	0	0	0	1.91754	high
TCGA-NH-A50T	1.51507	0	1	0	0	0	0	0	1	0	1	0	0	0	0	1	1	0	1	0	1	0	0	1	0	1	1	0.318702	low
TCGA-WS-AB45	5.83562	0	0	1	0	0	1	1	0	1	1	1	1	0	0	0	0	1	0	0	1	1	0	1	0	0	0	0.27274	low
TCGA-AA-A00Z	1.83288	0	0	0	0	0	0	1	1	0	0	1	0	1	1	1	1	1	0	0	0	0	1	1	0	1	1	1.18453	low
TCGA-CM-6674	1.07945	0	0	1	0	0	1	0	0	1	1	0	0	0	0	1	1	1	1	1	1	1	1	0	0	1	1	0.896682	low
TCGA-AA-3833	1.32877	0	0	1	0	0	1	0	1	0	0	1	0	1	0	0	0	1	1	1	0	1	1	1	1	0	1	6.94141	high
TCGA-A6-2680	2.92603	0	0	0	0	1	0	0	1	1	1	1	0	1	0	0	0	1	0	0	0	1	1	1	1	1	1	0.830809	low
TCGA-CM-5862	0.419178	1	1	1	1	1	0	0	1	0	1	1	0	0	0	1	1	1	0	1	1	0	0	1	1	1	1	1.47173	high
TCGA-AA-3555	2.49589	0	0	1	0	0	0	1	0	0	0	1	1	0	0	1	1	1	0	0	1	1	0	1	0	1	1	2.40736	high
TCGA-DM-A28G	5.06575	1	0	0	0	1	0	1	1	1	0	1	0	0	0	1	0	1	1	1	1	1	0	1	0	1	0	3.63349	high
TCGA-5M-AATE	3.28767	0	1	0	0	1	0	1	1	0	1	1	0	0	1	1	1	0	0	1	1	0	0	0	0	1	0	0.297424	low
TCGA-DM-A28H	9.75616	0	0	0	1	0	0	0	1	0	1	1	0	0	0	1	1	1	0	0	1	0	0	1	0	1	1	0.970882	low
TCGA-AA-A024	3.25479	1	0	0	0	0	1	1	1	0	1	1	1	1	0	0	0	1	1	0	0	1	1	1	0	1	0	7.24301	high
TCGA-CM-4747	2.08493	0	0	0	1	1	0	1	0	1	0	0	1	1	0	0	1	1	0	0	0	0	1	1	0	1	1	0.295394	low
TCGA-G4-6314	2.99452	0	0	1	0	0	0	1	1	0	0	1	0	0	0	1	1	1	0	0	1	1	0	1	0	1	0	5.63217	high
TCGA-AA-3930	0.167123	1	0	1	1	0	0	0	1	0	0	0	0	0	0	1	0	1	1	1	0	1	0	1	0	1	0	62.4845	high
TCGA-CA-6718	0.838356	1	1	1	0	1	1	1	1	0	0	0	0	0	0	1	1	1	1	1	1	1	0	0	0	0	1	1.23475	low
TCGA-AD-6963	2.28493	0	0	0	0	1	1	0	1	1	1	0	0	0	0	0	1	1	0	0	1	0	1	0	1	0	1	0.0121676	low
TCGA-AA-3982	2.25205	0	0	1	0	1	0	1	1	0	1	1	0	1	0	0	1	1	1	0	1	0	0	1	0	1	1	0.606604	low
TCGA-CM-6680	1.00274	0	1	0	0	1	0	1	1	0	1	1	1	1	0	1	1	1	0	1	1	1	0	0	0	1	0	9.95953	high
TCGA-DM-A1D6	1.56164	1	0	0	1	0	0	1	1	0	0	1	1	0	0	1	0	1	1	0	1	1	0	1	0	1	0	16.809	high
TCGA-AZ-6603	2.46301	1	1	0	0	1	0	1	1	0	1	1	0	0	0	1	0	1	0	1	1	1	0	1	0	1	1	2.41426	high
TCGA-A6-6142	2.09041	0	0	1	1	1	0	1	0	0	1	1	0	0	0	1	1	1	0	1	1	1	1	0	0	0	1	1.75209	high
TCGA-AZ-4315	4.86575	0	0	0	0	1	1	1	0	0	1	0	0	0	0	1	0	1	1	0	0	0	1	1	1	0	1	0.0323724	low
TCGA-AD-6895	2.09041	0	0	1	0	1	1	1	0	1	1	1	1	1	0	1	0	1	1	1	1	1	1	1	0	0	1	1.03312	low
TCGA-CA-5796	1.03288	0	0	0	0	1	1	1	1	1	0	0	1	0	0	0	1	0	0	0	0	1	0	1	0	0	0	0.0641076	low
TCGA-AA-3510	5.33151	0	0	0	0	0	1	0	1	1	0	0	1	1	0	1	1	1	1	0	0	0	1	1	0	1	1	1.30652	low
TCGA-F4-6807	3.5863	0	1	1	0	1	1	1	1	1	1	1	1	0	0	1	1	1	0	1	1	0	0	0	0	0	0	0.661405	low
TCGA-G4-6310	5.30137	0	0	0	0	1	0	1	1	0	1	0	0	0	0	1	1	1	0	1	1	1	1	1	0	1	1	0.671514	low
TCGA-AA-A00K	1.50411	0	0	0	0	0	0	1	1	0	1	0	1	1	0	0	0	1	0	0	0	0	0	1	0	1	1	0.773642	low
TCGA-D5-6529	1.68219	0	0	1	0	0	0	1	0	0	1	1	1	0	0	1	1	1	0	1	1	1	0	0	0	1	0	6.51889	high
TCGA-AA-A01I	2.58356	0	0	0	0	1	1	1	0	0	0	0	0	0	0	1	1	1	0	0	0	0	0	1	0	1	1	0.0650369	low
TCGA-AA-A01Z	3.08493	0	0	1	1	1	0	1	1	0	1	0	1	0	0	1	1	1	1	0	0	0	1	1	1	1	1	0.875697	low
TCGA-G4-6588	2.18082	0	0	0	0	1	1	0	0	0	0	0	0	1	0	1	0	1	1	1	0	1	0	0	0	0	1	1.63311	high
TCGA-CK-5912	4.09041	1	1	1	0	1	1	0	1	0	0	0	0	0	0	1	0	1	1	1	1	1	0	0	0	1	1	7.77634	high
TCGA-CM-6679	0.838356	0	0	1	0	1	1	1	1	0	1	1	0	0	0	1	0	1	0	0	1	1	1	0	0	0	1	0.981263	low
TCGA-AA-3519	0.756164	0	0	0	0	1	0	1	1	0	1	1	1	1	0	1	1	1	0	0	0	0	1	1	1	0	0	0.678129	low
TCGA-AZ-6607	0.265753	1	0	1	0	1	0	0	0	0	1	1	0	1	0	0	0	1	1	1	1	1	1	1	1	0	1	1.49252	high
TCGA-CM-5344	1.83562	0	0	1	0	1	0	1	1	0	1	1	0	0	0	1	1	1	1	0	0	1	0	1	0	1	0	4.79086	high
TCGA-AA-3831	1.49863	0	0	0	0	0	1	1	0	1	1	1	1	1	0	0	1	0	1	1	1	0	1	0	0	1	0	0.279652	low
TCGA-DM-A0X9	9.97534	0	0	0	0	0	1	1	0	0	1	0	0	0	0	1	0	1	1	1	1	1	0	0	0	1	0	0.890732	low
TCGA-D5-6541	1.29863	0	1	1	1	1	1	1	0	0	1	1	1	0	0	1	0	1	1	1	0	0	0	1	0	1	0	5.62189	high
TCGA-A6-4107	2.70411	0	0	0	0	1	1	1	0	1	1	1	1	1	1	1	0	0	1	0	1	0	1	1	1	1	0	0.0275618	low
TCGA-AA-3875	1.50411	0	0	0	0	0	1	1	1	0	1	1	1	0	0	1	1	0	0	0	1	1	0	1	0	1	0	0.42094	low
TCGA-G4-6295	0.69589	0	0	0	0	1	0	0	1	0	1	0	0	0	0	1	0	1	0	0	1	0	1	1	0	0	1	0.319561	low
TCGA-DM-A28F	2.99726	1	0	0	1	0	0	1	1	0	1	1	0	1	0	0	1	1	0	0	1	0	1	1	0	1	0	1.52674	high
TCGA-CM-4743	1.92055	0	0	1	1	0	1	0	1	1	1	0	1	0	0	1	0	1	0	1	1	1	1	0	1	0	1	1.16405	low
TCGA-F4-6808	2.80548	0	0	0	1	1	0	0	1	0	1	1	0	0	0	1	0	1	0	0	1	0	0	1	0	1	1	1.05796	low
TCGA-AA-A00U	1.41918	0	0	0	0	0	1	1	1	0	1	1	1	0	0	1	1	1	1	0	0	0	1	1	0	1	1	1.05914	low
TCGA-AA-A017	1.25205	0	0	0	0	1	0	1	1	0	1	0	0	1	0	1	0	1	0	1	1	0	1	1	0	1	1	0.828616	low
TCGA-AA-A01X	2.16712	0	0	0	1	1	1	0	1	0	0	1	0	0	0	0	1	1	0	0	0	0	1	1	0	1	0	1.69431	high
TCGA-CM-5861	1.25205	0	1	0	1	1	1	0	0	1	0	0	0	0	0	1	0	0	0	1	1	1	0	1	0	1	0	0.462215	low
TCGA-D5-5537	3.78356	1	1	0	0	1	0	1	1	0	0	1	0	0	0	1	0	1	0	0	1	1	0	1	0	1	0	4.76462	high
TCGA-CK-4948	12.3342	0	0	1	0	1	0	0	1	1	1	1	1	0	0	1	1	1	1	0	1	0	0	1	1	0	1	0.212629	low
TCGA-AA-3968	1.83288	0	0	0	0	1	1	1	1	0	0	1	0	0	1	1	1	0	1	0	1	1	1	1	0	1	0	0.289535	low
TCGA-D5-6530	1.70137	0	0	0	1	1	1	1	0	1	1	1	0	0	0	1	0	1	1	1	1	1	0	0	0	1	0	0.81406	low
TCGA-AA-3818	0.0821918	1	0	0	0	1	1	1	1	0	0	1	1	0	1	1	1	1	1	0	0	0	0	1	0	1	0	0.53037	low
TCGA-G4-6315	5.1589	0	0	1	0	1	0	0	1	0	0	1	0	0	0	1	1	0	0	0	1	0	1	0	0	1	1	1.84239	high
TCGA-AA-3562	1.66575	0	1	1	1	1	1	0	1	0	1	1	0	0	0	1	1	0	0	1	1	0	1	1	0	1	1	1.17586	low
TCGA-AA-A010	2.91507	0	0	0	1	0	0	0	0	0	1	0	1	0	0	1	1	0	1	0	0	0	1	1	0	1	0	1.35814	high
TCGA-A6-2675	3.61918	0	0	1	0	1	1	1	1	0	1	1	0	1	0	1	0	1	0	0	1	1	0	1	0	0	1	0.586229	low
TCGA-AA-3952	0.167123	1	0	1	1	0	0	0	1	0	0	1	1	0	0	1	1	0	1	1	0	0	1	0	0	1	0	66.1991	high
TCGA-AA-3532	2.41644	0	0	1	0	1	1	1	1	0	1	0	0	0	0	1	1	0	0	0	1	0	0	1	1	1	0	0.0266899	low
TCGA-AA-3989	0.663014	1	0	1	0	1	0	1	1	0	1	1	1	1	0	0	1	1	1	0	0	1	1	1	0	0	1	3.79562	high
TCGA-AA-3530	1.58904	0	1	0	0	1	0	1	1	0	1	1	0	0	0	1	1	0	0	1	0	1	0	1	0	1	0	2.02231	high
TCGA-CK-4947	1.46301	0	0	0	0	1	1	1	0	1	1	1	0	0	0	1	1	1	1	0	1	1	0	1	0	1	1	0.061823	low
TCGA-AA-3554	1.49589	0	1	1	0	1	1	1	1	0	1	1	0	0	0	0	1	1	0	0	0	1	0	1	1	0	1	0.150609	low
TCGA-D5-5538	4.55068	1	0	1	1	1	0	1	1	0	0	1	0	0	0	1	0	1	0	1	1	0	0	0	0	0	1	3.2017	high
TCGA-D5-6532	1.52055	0	0	0	1	1	0	0	1	1	0	0	0	0	0	0	1	1	0	0	1	0	0	1	1	0	1	0.0320077	low
TCGA-DM-A0XD	2.03562	1	1	0	1	0	0	0	1	1	0	1	0	1	0	0	1	1	1	1	1	1	0	1	0	1	0	14.6815	high
TCGA-AA-3492	0.00273973	1	0	1	0	0	1	0	0	1	1	1	0	0	0	0	0	1	0	1	0	0	1	1	0	0	1	0.436234	low
TCGA-AD-6899	0.482192	1	1	1	0	0	1	1	1	0	0	0	0	0	0	1	0	1	0	1	1	1	0	0	0	1	1	4.35992	high
TCGA-AA-3844	1.24384	0	0	0	0	1	0	1	1	0	1	1	1	1	1	1	1	0	0	0	1	0	0	1	1	0	0	0.0367836	low
TCGA-AD-6901	1.86849	1	0	1	1	1	1	1	1	0	1	1	1	0	0	1	0	1	0	0	0	1	1	0	0	1	0	14.871	high
TCGA-AZ-4682	1.86301	1	0	0	1	1	0	0	1	0	1	1	1	0	0	1	1	1	0	0	1	0	0	0	1	1	1	0.578821	low
TCGA-AA-A01P	3.1726	1	1	1	0	0	1	1	0	1	1	1	1	0	0	0	0	1	0	1	0	1	1	1	0	0	1	1.33273	high
TCGA-G4-6293	11.0986	0	1	0	0	0	1	1	0	1	1	1	0	0	0	0	1	1	1	0	1	0	0	1	1	0	0	0.0185064	low
TCGA-AA-3715	1.5863	1	0	1	0	0	0	0	1	0	1	0	1	1	0	0	0	1	0	1	0	1	1	1	0	1	1	22.291	high
TCGA-AY-A71X	1.61096	0	0	0	1	0	0	1	1	1	0	1	1	0	0	1	1	1	0	0	0	1	0	1	0	1	0	5.45617	high
TCGA-DM-A28C	6.78082	1	0	1	1	1	0	1	1	0	1	1	1	0	1	1	1	0	1	0	0	0	0	1	0	1	0	0.905373	low
TCGA-AA-3560	1.66575	0	0	0	0	1	0	1	1	0	0	1	1	1	0	0	0	1	0	0	1	0	1	1	0	0	1	1.05687	low
TCGA-AA-3552	1.08493	1	1	0	0	0	0	1	1	0	1	1	1	0	0	1	1	1	0	1	0	1	1	1	0	1	1	11.5652	high
TCGA-CM-6166	1.83288	0	0	0	0	1	0	1	1	0	1	1	0	0	0	1	1	1	1	0	1	1	0	1	0	1	0	1.2725	low
TCGA-AZ-5403	5.23288	1	0	1	0	1	1	0	1	0	1	1	0	0	1	1	1	1	0	0	1	0	0	1	0	1	1	0.138741	low
TCGA-G4-6299	6.2137	0	1	1	1	1	1	0	1	0	1	1	0	0	0	1	1	1	1	1	1	1	1	0	1	0	1	2.71034	high
TCGA-AA-3496	0.0849315	0	1	1	0	1	1	1	1	0	1	1	1	0	0	1	1	1	0	1	1	1	0	0	0	1	1	2.95772	high
TCGA-G4-6304	4.46849	0	0	0	1	0	0	0	1	1	1	1	0	0	0	1	1	1	1	0	1	1	0	1	0	1	0	2.74591	high
TCGA-CM-5864	1.25205	0	0	0	1	1	0	1	1	0	0	0	0	0	0	1	1	1	0	0	1	0	0	1	0	1	0	0.509527	low
TCGA-AY-A8YK	1.56986	0	1	0	0	0	0	1	1	0	1	0	0	1	0	1	0	1	0	1	1	0	1	1	0	1	0	4.16179	high
TCGA-DM-A28K	8.1863	0	0	0	0	0	1	1	0	1	0	0	0	1	0	1	1	1	1	0	1	1	0	0	0	1	0	0.375946	low
TCGA-CK-5913	4.27671	0	0	1	0	1	1	0	0	1	1	0	1	0	0	1	1	1	0	0	1	0	0	1	0	0	1	0.0343942	low
TCGA-AZ-6605	0.435616	1	1	1	0	1	1	0	1	1	1	1	1	0	0	1	1	1	0	1	1	1	1	0	0	0	1	2.59308	high
TCGA-CM-4751	2.25205	0	0	1	0	0	0	0	1	0	1	0	1	1	0	0	1	1	1	0	1	1	0	1	0	1	0	6.20792	high
TCGA-CM-6677	0.923288	0	0	1	0	0	1	0	1	0	0	1	0	1	1	1	0	1	1	0	1	0	0	1	0	1	1	1.67179	high
TCGA-G4-6627	5.9589	0	0	1	0	0	0	1	0	0	1	0	0	0	0	0	1	1	0	1	1	0	0	1	0	1	1	0.178239	low
TCGA-AA-3544	1.16712	0	1	0	0	1	1	0	1	1	0	0	0	0	0	0	0	1	0	1	1	0	0	1	1	0	1	0.0475413	low
TCGA-A6-A567	5.15342	1	1	1	1	1	0	1	1	0	0	1	0	0	0	0	0	0	1	1	0	0	0	1	0	1	1	4.46974	high
TCGA-CM-6676	0.923288	0	0	0	0	1	0	1	1	0	1	1	1	0	0	1	1	1	1	0	1	0	0	1	0	1	1	0.516588	low
TCGA-AA-3867	2.00274	0	0	1	0	1	1	1	1	0	1	1	1	0	0	1	1	1	0	0	0	0	0	1	0	1	1	0.546342	low
TCGA-CA-6719	1.19178	0	0	1	0	1	1	1	1	1	1	1	1	1	0	1	0	1	1	1	0	0	1	0	0	0	1	2.58713	high
TCGA-NH-A50V	1.61096	0	1	0	0	0	1	1	1	0	0	0	1	0	0	1	0	1	0	1	1	0	0	1	0	1	0	2.05586	high
TCGA-AA-A01C	1.25205	0	0	1	0	1	0	1	1	0	1	1	1	1	0	1	1	1	1	0	0	1	1	1	0	1	1	11.2815	high
TCGA-AA-A02F	3.33151	0	0	0	0	1	0	1	1	0	0	0	0	1	1	1	0	0	1	0	1	0	1	1	0	1	0	0.401463	low
TCGA-AA-A00O	2.25205	0	1	0	0	1	0	1	1	0	0	0	0	0	0	1	1	1	0	1	0	0	1	1	0	1	1	1.7101	high
TCGA-AZ-4615	2.74521	0	1	1	0	0	1	0	0	0	1	0	0	1	0	1	0	0	1	1	0	1	1	1	1	0	1	0.942093	low
TCGA-AA-3854	3.00274	0	0	0	0	1	0	1	1	1	0	1	1	1	0	0	1	1	1	0	0	1	1	1	0	1	0	5.52581	high
TCGA-AA-A01V	0.0849315	0	0	0	0	0	0	1	1	1	0	1	1	0	1	1	0	0	0	0	0	0	1	1	0	1	0	0.880903	low
TCGA-AA-A00D	1.58356	0	1	0	0	1	1	1	1	0	0	1	1	0	0	0	0	1	1	1	1	0	0	1	0	1	1	1.3	low
TCGA-A6-5657	2.63562	0	0	1	0	1	0	1	1	1	1	1	1	0	0	1	0	1	1	0	1	1	0	1	0	1	0	3.70756	high
TCGA-AA-3522	3.08767	0	0	1	0	1	0	1	0	1	1	1	1	0	0	1	1	1	0	0	1	1	0	1	1	0	1	0.0778337	low
TCGA-AA-3877	2.58356	0	0	0	0	0	1	1	1	1	1	1	0	0	0	1	1	1	0	0	1	1	1	1	0	0	1	0.134909	low
TCGA-D5-6923	1.03562	0	0	1	0	1	1	1	1	0	1	1	1	1	0	0	1	1	0	0	1	1	0	1	0	0	1	0.344071	low
TCGA-AZ-6599	0.564384	1	0	0	1	0	0	1	1	0	1	1	0	0	0	1	1	1	1	0	1	1	0	1	0	1	0	2.98767	high
TCGA-D5-6922	0.843836	0	0	1	0	1	1	1	1	1	0	0	0	0	0	0	1	1	1	0	1	1	1	1	0	1	1	0.251592	low
TCGA-AA-3692	3	1	0	0	1	0	0	1	1	0	1	1	1	1	0	1	1	1	1	0	1	1	0	0	0	1	0	11.3862	high
TCGA-4T-AA8H	1.05479	0	1	0	1	0	0	1	1	1	1	1	1	1	0	1	0	1	1	1	1	0	0	1	0	1	0	8.69306	high
TCGA-AA-A01Q	0.0849315	0	0	0	1	0	0	0	1	0	1	1	0	1	0	1	0	1	0	0	0	1	1	1	0	1	0	33.6035	high
TCGA-AA-3979	2	0	0	0	1	1	0	1	1	1	1	1	1	0	0	1	1	1	0	0	1	0	0	1	0	1	1	0.240327	low
TCGA-A6-A565	1.35342	1	1	1	0	0	0	1	1	1	1	1	1	0	0	0	0	1	0	1	0	1	0	0	0	1	0	19.8223	high
TCGA-A6-5667	2.43014	0	0	0	0	1	0	1	1	0	1	0	0	0	0	1	1	1	0	0	1	0	1	1	0	0	1	0.0923393	low
TCGA-AA-3842	3.08493	0	0	1	0	0	1	0	1	1	0	0	0	0	0	0	0	1	0	0	1	0	1	1	0	0	1	0.242173	low
TCGA-A6-A5ZU	0.80274	0	1	1	0	1	0	0	1	0	1	0	1	1	0	0	0	1	1	1	0	1	1	1	1	0	0	13.3513	high
TCGA-AA-3870	2.49863	0	1	1	0	1	1	0	1	0	0	1	1	0	0	1	0	1	1	1	0	0	1	0	1	0	1	8.57085	high
TCGA-NH-A6GC	1.06575	0	0	0	0	1	0	1	1	0	0	1	1	0	0	1	0	1	0	0	1	1	0	1	0	1	0	4.90185	high
TCGA-AA-3511	0.580822	0	0	1	0	1	1	1	1	0	0	1	0	0	1	0	1	0	0	0	1	0	0	1	0	0	1	0.0195291	low
TCGA-CM-6167	1.24932	0	0	1	0	1	0	1	1	1	1	1	1	0	0	0	1	1	1	1	1	1	1	1	0	1	0	4.10801	high
TCGA-CM-5348	1.91507	0	0	1	0	1	1	0	1	0	0	1	0	0	0	0	0	1	0	1	1	1	1	0	1	0	1	1.59193	high
TCGA-AA-3949	2.16712	0	1	1	0	1	1	0	0	0	1	1	0	1	0	0	0	0	0	1	1	1	0	1	0	0	1	0.443626	low
TCGA-AY-A54L	1.43836	0	0	0	1	1	0	0	1	1	1	0	0	1	0	1	1	1	0	0	1	0	1	1	0	1	0	0.655169	low
TCGA-A6-2671	3.64658	1	0	1	1	1	1	1	1	1	1	1	0	1	0	1	0	1	0	0	0	1	1	1	1	0	1	0.476974	low
TCGA-NH-A8F8	1.4	1	0	1	0	0	0	1	1	0	1	1	1	0	0	1	1	1	0	1	1	1	0	0	0	1	0	13.5061	high
TCGA-AA-3516	1.08493	1	0	1	0	1	1	0	1	0	0	1	1	1	0	0	0	1	1	1	0	1	1	1	1	0	1	7.25075	high
TCGA-G4-6628	6.6411	0	0	1	1	0	1	0	1	1	1	0	0	0	0	0	1	0	1	1	1	1	0	1	0	1	1	0.28	low
TCGA-AD-6964	0.906849	1	0	1	1	0	1	0	1	0	0	1	0	0	0	1	1	1	1	1	1	1	0	0	0	1	0	26.1818	high
TCGA-AD-6888	1.29315	1	0	0	1	1	0	0	1	0	1	1	1	0	0	1	1	1	0	0	1	1	1	0	0	0	1	3.11688	high
TCGA-AA-3973	1.08767	0	1	0	1	1	1	1	1	0	1	0	0	1	0	1	1	0	1	1	0	1	1	1	0	1	1	1.137	low
TCGA-AA-3680	0.917808	1	0	0	0	1	0	1	1	0	0	1	1	0	0	1	1	1	1	0	0	1	0	1	0	1	0	7.27264	high
TCGA-AA-3514	0.0849315	0	0	1	0	0	0	0	1	0	0	1	1	1	0	0	0	1	0	0	0	0	1	1	0	1	1	22.997	high
TCGA-QG-A5YW	2.45479	0	1	0	0	0	0	1	1	1	1	0	0	0	0	1	0	1	1	1	1	1	0	1	0	1	0	2.32715	high
TCGA-AY-A69D	1.48767	0	0	0	0	0	1	1	1	0	1	1	1	0	1	0	1	0	1	0	0	1	0	1	1	1	0	0.100683	low
TCGA-AA-3673	4.16986	0	0	0	0	1	0	1	1	0	1	1	0	0	1	1	1	0	1	0	1	0	0	1	0	1	1	0.0515481	low
TCGA-AA-3855	2.67123	0	0	0	0	0	0	1	1	0	1	1	1	0	1	1	1	1	1	0	0	1	1	1	0	1	1	2.18358	high
TCGA-CM-6172	0.917808	0	0	0	0	1	0	1	1	0	1	0	0	0	0	1	0	1	1	1	1	1	0	1	0	1	1	0.992815	low
TCGA-AZ-6600	1.00822	1	0	1	1	1	0	0	1	0	1	1	1	0	0	1	0	1	0	1	0	1	0	1	0	1	1	26.8124	high
TCGA-F4-6463	2.97808	0	1	1	0	1	1	1	1	1	0	1	0	0	0	1	1	1	1	0	1	0	1	1	0	1	0	1.27258	low
TCGA-AA-3971	1.33973	0	0	1	0	1	1	1	1	0	1	1	0	1	1	1	0	0	0	0	0	0	0	1	0	0	1	0.0806375	low
TCGA-AA-3666	0.167123	1	1	1	0	1	0	1	1	0	1	0	1	0	1	0	0	0	0	1	0	1	0	1	0	1	1	0.726473	low
TCGA-D5-6898	0.627397	0	0	1	0	1	1	1	1	0	1	0	0	1	0	0	1	1	1	0	1	0	0	1	0	1	1	0.114735	low
TCGA-D5-6537	0.4	1	0	0	1	1	1	1	1	0	1	1	0	0	0	1	1	1	1	1	1	1	0	0	0	1	1	1.08118	low
TCGA-SS-A7HO	5.01096	0	0	0	0	1	0	1	1	0	0	1	1	0	1	1	1	1	0	0	1	0	1	1	1	1	1	0.174857	low
TCGA-AA-A00L	3.16986	0	0	0	0	1	0	0	1	0	1	1	0	0	0	1	0	1	0	1	0	0	1	1	0	0	0	4.31172	high
TCGA-G4-6321	1.8411	0	0	0	0	1	1	1	0	0	1	1	0	0	0	0	0	1	0	0	0	1	1	0	1	0	1	0.0948448	low
TCGA-AA-3489	0.586301	1	0	1	1	1	1	1	1	0	0	1	1	1	0	1	0	1	0	1	1	0	0	0	0	1	0	11.7327	high
TCGA-AA-A01S	0.0849315	0	0	0	1	0	0	0	1	1	0	1	1	0	0	0	0	1	0	0	0	0	1	1	0	1	1	4.83672	high
TCGA-DM-A1HB	11.3041	0	0	0	1	1	0	0	0	1	0	0	0	0	0	1	1	1	1	0	1	1	0	0	1	0	0	0.22585	low
TCGA-D5-6931	1	0	1	0	0	0	1	1	0	1	1	1	1	0	0	0	0	1	1	1	1	0	0	0	0	1	1	0.366971	low
TCGA-T9-A92H	0.991781	0	0	0	0	0	0	1	1	0	1	0	0	1	0	1	0	1	1	1	1	1	0	1	0	1	0	4.66497	high
TCGA-AD-6965	2.20548	0	0	1	0	0	1	1	1	1	0	1	0	0	0	1	0	1	0	0	1	0	1	1	0	1	1	0.792799	low
TCGA-DM-A1D7	1.10959	1	0	0	0	0	0	0	1	0	0	0	1	1	1	1	0	1	0	0	1	0	1	1	0	1	0	3.39224	high
TCGA-A6-6140	2.01096	0	0	0	1	1	0	1	1	0	1	0	0	1	0	0	1	1	0	0	1	0	0	1	0	0	1	0.0726328	low
TCGA-AA-3553	2	0	0	0	0	1	1	0	1	1	1	1	1	0	0	0	1	1	1	0	1	0	0	1	0	1	1	0.119267	low
TCGA-A6-A56B	4.68767	1	0	1	0	1	0	1	1	0	0	0	0	0	0	1	0	1	1	0	0	0	1	1	0	1	0	5.87038	high
TCGA-D5-6927	0.786301	0	0	1	0	0	1	0	1	0	1	0	1	1	0	1	1	1	0	1	1	1	0	1	0	0	0	2.86704	high
TCGA-AA-A00E	2.50137	0	0	0	1	0	1	0	1	1	1	1	1	1	0	1	0	0	0	1	0	1	1	1	0	1	0	8.60691	high
TCGA-A6-2676	3.57534	1	0	1	1	0	1	0	1	0	0	1	0	1	0	1	0	1	1	0	0	0	1	1	0	1	1	19.4521	high
TCGA-AA-A02K	1.16712	1	0	0	1	0	0	0	1	1	0	1	0	0	1	1	0	1	1	0	0	1	0	1	0	1	0	6.34806	high
TCGA-F4-6570	0.515068	1	1	1	0	0	1	0	0	1	1	1	1	0	0	1	0	1	1	1	1	1	1	0	0	1	1	9.42698	high
TCGA-DM-A1D9	11.6986	0	0	0	0	1	0	1	1	0	0	0	0	0	1	1	0	0	1	0	1	0	0	1	0	1	0	0.150979	low
TCGA-CK-4951	5.84658	1	1	1	0	0	1	1	1	1	1	0	0	1	0	1	1	0	0	1	0	1	1	1	0	1	0	1.61444	high
TCGA-AA-3956	2.83562	0	0	0	0	1	0	1	1	0	1	0	0	0	0	1	1	1	1	1	0	1	0	1	0	1	0	1.91842	high
TCGA-A6-2683	1.38082	1	0	0	1	0	0	1	1	0	0	1	1	1	0	0	0	0	0	0	0	0	1	1	0	1	1	3.49445	high
TCGA-AA-3713	1.5863	0	0	1	0	0	1	1	1	1	1	1	0	0	0	0	0	1	1	1	1	1	0	1	0	0	1	0.47184	low
TCGA-AA-3955	1.74795	0	0	0	0	1	0	1	1	0	1	0	0	0	1	0	1	0	0	0	1	1	0	1	0	0	1	0.011942	low
TCGA-AZ-6598	4.11781	1	0	1	1	1	0	0	1	1	0	1	1	1	1	1	0	1	1	0	1	0	1	1	0	1	1	5.02048	high
TCGA-F4-6704	0.128767	0	1	1	0	0	1	1	1	0	0	1	0	0	0	0	1	1	1	1	1	1	1	1	0	1	0	10.7592	high
TCGA-CM-6163	1.16986	0	0	1	0	1	1	1	1	0	1	0	0	0	0	0	0	0	0	0	1	1	0	1	0	1	0	0.162109	low
TCGA-AA-3869	2.25205	1	0	1	0	1	0	1	1	0	0	1	0	0	0	1	0	1	0	0	0	0	0	1	0	1	0	5.02235	high
TCGA-AA-3538	2.16712	0	0	1	0	1	0	1	1	0	1	1	1	0	0	0	0	1	0	0	1	1	1	1	0	0	1	1.67015	high
TCGA-DM-A1DA	0.624658	1	0	0	1	1	0	0	1	0	0	0	0	0	0	1	0	1	1	0	1	0	0	0	0	1	1	1.99973	high
TCGA-AA-3494	0.0849315	0	0	0	0	1	0	1	1	1	0	1	1	1	0	1	1	1	0	0	1	0	0	1	0	1	1	0.48057	low
TCGA-CM-6168	1.08219	0	0	1	0	0	1	0	1	1	1	1	1	0	0	1	1	1	0	0	1	1	0	1	0	0	0	1.0343	low
TCGA-AA-3851	2.75616	0	0	0	0	1	1	1	1	0	1	1	0	1	0	0	1	1	1	1	1	1	0	1	0	1	1	0.471546	low
TCGA-A6-6654	1.98904	0	1	1	0	1	1	1	0	0	1	0	0	1	0	1	0	1	1	1	1	0	1	0	0	0	1	0.671667	low
TCGA-DM-A28E	9.99452	0	0	0	1	1	0	1	1	0	1	0	0	0	0	0	0	1	0	1	1	0	0	1	1	0	1	0.0589852	low
TCGA-AA-3509	5.24658	0	0	0	0	0	0	1	1	0	1	1	0	0	0	0	1	1	0	0	1	0	0	1	1	0	1	0.0440233	low
TCGA-AA-3970	3.00274	0	0	0	1	1	0	1	1	0	1	1	0	0	0	0	1	1	0	0	1	0	0	1	0	1	0	0.35604	low
TCGA-CK-5914	1.83288	0	0	1	0	1	1	1	1	0	1	1	0	1	0	1	1	1	1	0	1	0	0	1	1	0	1	0.0863101	low
TCGA-A6-5666	2.72603	0	0	1	1	1	0	1	1	1	1	1	1	0	0	1	1	1	1	1	1	0	0	0	0	0	1	1.10065	low
TCGA-4N-A93T	0.4	0	0	0	1	0	0	1	1	0	1	1	0	1	0	0	1	1	0	1	0	1	0	1	0	1	0	6.27385	high
TCGA-CM-6171	1.16986	0	0	0	0	0	1	1	0	1	0	1	1	1	0	1	1	1	0	0	1	0	1	0	0	0	1	0.216217	low
TCGA-G4-6309	7.12329	0	0	0	0	1	1	0	0	1	1	1	1	0	0	1	0	1	1	0	1	1	0	1	0	0	0	0.37671	low
TCGA-AA-3697	7.08767	0	0	0	0	0	1	1	1	0	1	1	1	0	1	0	1	1	1	0	1	0	0	0	0	1	0	0.227971	low
TCGA-G4-6586	2.98356	0	0	0	1	0	1	0	1	1	1	1	1	1	0	1	0	1	0	1	1	1	1	0	1	0	1	1.83382	high
TCGA-AZ-4616	0.427397	1	0	0	1	0	1	0	1	0	0	0	1	0	0	1	1	1	1	1	1	1	0	1	0	1	0	6.5271	high
TCGA-D5-6928	0.969863	0	1	1	0	1	1	1	1	1	1	1	1	0	0	0	0	1	1	1	1	1	1	1	0	0	1	1.40089	high
TCGA-AA-A02J	0.419178	1	0	0	1	0	0	0	1	0	1	1	0	1	0	1	0	1	1	0	1	0	1	1	0	1	1	6.62585	high
TCGA-D5-6538	1.4274	0	0	0	0	1	0	1	1	1	1	1	1	0	1	1	1	1	0	0	1	1	0	1	0	1	0	0.265584	low
TCGA-NH-A6GB	1.30411	0	1	0	0	1	0	1	1	0	1	1	0	1	0	1	1	1	0	1	1	0	0	0	1	0	1	0.302562	low
TCGA-A6-2682	1.16164	1	0	1	1	0	0	1	1	0	1	1	0	0	0	1	1	1	1	0	0	0	1	1	1	0	1	0.999239	low
TCGA-AA-A02Y	3.33151	0	0	0	1	1	0	1	1	1	1	0	0	0	0	0	1	1	0	0	0	0	0	1	1	1	0	0.0528414	low
TCGA-CK-6747	2.24658	0	0	1	0	0	0	1	0	1	0	0	1	1	0	1	1	1	1	0	1	1	0	0	0	1	1	1.71147	high
TCGA-A6-6782	1.69041	0	1	1	0	1	0	1	0	0	1	1	0	0	0	1	0	1	0	1	0	0	0	1	0	1	0	3.82556	high
TCGA-CM-5860	2.66849	0	1	1	0	1	1	1	1	1	1	1	1	0	0	1	0	1	0	1	1	1	0	0	1	0	1	0.51506	low
TCGA-AA-A00R	0.0821918	0	1	1	1	0	1	0	1	0	1	1	1	1	0	0	1	1	0	1	0	1	1	1	0	0	1	14.7874	high
TCGA-A6-6653	2.03288	0	0	0	0	1	0	0	0	0	0	0	1	0	0	1	0	1	0	0	0	1	0	0	0	0	1	1.63611	high
TCGA-AD-6890	2.04384	0	0	0	0	0	0	0	1	0	1	1	1	0	0	1	1	1	0	0	1	1	0	1	0	1	1	2.4504	high
TCGA-D5-6539	1.0411	0	0	1	0	1	0	0	1	1	1	1	1	0	1	0	1	1	0	0	1	0	1	1	0	1	1	0.282564	low
TCGA-AD-A5EK	1.36986	0	0	0	0	1	0	0	1	0	1	1	1	1	1	1	1	1	0	0	1	0	0	1	0	1	1	0.413724	low
TCGA-A6-3808	2.77808	0	0	0	0	0	0	0	0	1	1	1	1	0	0	1	1	1	1	0	0	1	0	1	0	1	0	2.73734	high
TCGA-AA-3506	4.83562	0	1	0	0	0	0	0	1	0	0	1	1	1	0	0	1	1	0	0	1	0	1	0	1	0	1	1.78496	high
TCGA-AZ-6608	0.161644	1	0	0	1	0	0	0	1	1	1	1	0	0	0	1	0	1	0	1	1	0	1	1	0	1	0	4.81636	high
TCGA-AA-3678	3.91781	0	0	0	0	0	0	1	1	0	1	1	0	0	0	0	1	1	0	1	1	0	0	1	0	1	1	0.379797	low
TCGA-G4-6306	3.72329	0	0	0	1	1	1	0	1	0	1	1	0	1	0	1	1	1	0	0	1	0	0	0	1	0	1	0.118661	low
TCGA-F4-6806	3.45205	0	1	0	0	1	0	1	1	1	1	1	0	0	0	1	1	1	1	0	1	1	0	0	0	0	1	0.414883	low
TCGA-AA-A01T	2.75342	0	0	0	1	0	0	0	1	0	0	0	0	1	0	0	1	1	0	0	0	0	1	1	0	1	1	2.47243	high
TCGA-A6-6651	1.8137	0	1	1	0	0	1	1	1	0	0	1	0	0	0	1	1	1	0	1	1	1	1	1	0	0	1	3.47571	high
TCGA-AA-3812	2.92055	0	0	1	0	1	0	1	1	0	1	0	1	1	0	0	0	1	0	0	0	1	1	1	0	0	1	2.1054	high
TCGA-F4-6809	1.10411	1	0	1	0	1	0	1	1	0	0	1	1	1	0	1	0	1	1	0	1	0	0	0	0	1	0	15.6601	high
TCGA-AD-5900	1.0137	0	0	0	0	1	1	0	0	1	1	0	0	0	0	1	1	1	1	0	1	1	0	1	0	0	1	0.0308436	low
TCGA-D5-6930	1.11233	0	0	1	0	1	1	1	1	0	1	1	0	1	0	1	0	1	1	0	1	1	0	0	0	1	1	2.30136	high
TCGA-AA-A03J	3.4137	0	0	0	0	0	1	0	1	0	0	1	0	1	0	0	0	1	0	0	0	0	1	1	0	0	1	1.45931	high
TCGA-AA-3815	2.75342	0	0	1	1	0	1	0	1	1	0	1	1	1	0	1	0	1	0	1	0	0	1	1	0	0	1	10.5398	high
TCGA-CM-6169	1.08493	0	1	1	0	1	1	1	1	0	0	1	0	1	0	0	1	1	0	1	1	0	0	1	0	1	0	1.84782	high
TCGA-F4-6855	3.95068	0	1	1	1	1	0	1	1	0	0	1	0	0	1	1	0	1	1	0	1	1	0	0	0	1	0	12.2376	high
TCGA-A6-A566	2.07671	1	1	1	0	0	1	0	0	1	0	1	1	0	0	1	1	1	0	1	1	0	1	0	0	1	0	6.08746	high
TCGA-CA-6715	1.04932	0	0	0	1	1	0	1	1	1	0	1	0	0	0	1	1	1	0	0	1	0	0	1	1	0	1	0.0575785	low
TCGA-NH-A6GA	0.827397	1	1	0	0	0	0	0	1	0	1	1	1	0	0	1	0	1	1	0	0	1	0	1	0	1	0	34.9655	high
TCGA-AA-A004	1.16164	0	0	0	0	0	0	0	1	0	1	0	1	0	0	0	0	1	0	0	0	0	1	1	1	1	1	0.667222	low
TCGA-AD-6889	6.93699	1	0	1	0	0	0	1	0	0	1	1	1	1	0	1	1	1	0	0	0	1	1	1	0	0	1	3.30375	high
TCGA-D5-6536	1.48767	0	1	1	1	1	0	1	1	0	0	0	1	0	1	1	0	0	0	1	1	1	0	0	0	1	0	5.16737	high
TCGA-G4-6322	2.16986	0	0	0	0	0	1	0	1	0	0	1	1	1	1	1	1	1	1	0	1	0	0	0	0	1	0	2.13477	high
TCGA-AA-A029	4.33151	0	0	0	0	0	0	0	1	1	0	0	1	0	0	0	0	0	1	0	0	0	0	1	0	0	1	0.306947	low
TCGA-AZ-5407	7.35068	0	0	0	1	1	1	1	0	1	1	1	1	0	0	0	1	1	0	0	1	0	0	1	0	1	1	0.0291383	low
TCGA-AA-A00N	0.334247	1	1	1	0	0	0	1	1	0	1	1	1	1	0	1	1	1	1	1	0	1	1	1	0	1	0	103.799	high
TCGA-D5-6540	1.34521	0	0	0	0	0	1	0	0	1	1	1	1	0	0	1	0	0	1	1	1	1	1	0	0	0	0	1.23694	low
TCGA-AA-3548	2.83288	0	0	0	1	1	1	1	1	0	0	0	1	0	0	0	1	1	1	0	0	0	0	1	0	1	1	0.295517	low
TCGA-A6-6649	2.0137	0	1	0	0	1	1	1	1	0	1	1	0	0	0	1	0	1	1	1	1	1	1	0	1	0	1	0.787603	low
TCGA-DM-A282	11.5973	0	0	0	0	1	0	1	1	0	1	1	0	0	1	1	1	0	1	0	1	1	1	1	0	1	1	0.195201	low
TCGA-AA-3655	5.08493	0	0	1	0	1	0	1	1	0	1	1	1	0	1	0	1	0	0	0	1	1	0	1	0	1	0	0.318568	low
TCGA-G4-6311	3.28493	0	0	1	1	1	0	1	1	0	1	1	0	0	0	0	1	1	0	1	1	1	0	0	0	1	1	2.33001	high
TCGA-G4-6297	6.86575	0	0	1	0	1	1	1	1	0	1	0	0	0	0	0	1	1	0	1	1	1	1	0	1	0	1	0.111578	low
TCGA-5M-AAT6	0.794521	1	0	1	1	0	1	0	1	0	1	1	1	0	0	1	0	1	1	1	1	1	0	0	0	1	0	40.7769	high
TCGA-D5-6534	3.60548	0	1	1	0	1	1	0	0	0	1	1	1	0	0	0	0	1	0	1	1	1	1	1	1	0	0	1.43599	high
TCGA-DM-A1DB	3.69315	1	0	0	1	0	0	0	1	0	1	1	1	0	0	1	1	1	0	1	1	1	1	1	0	1	1	11.3452	high
TCGA-CM-6678	0.917808	0	0	0	0	1	1	1	1	1	0	0	0	0	1	1	1	0	1	0	1	1	0	1	0	1	0	0.0358851	low
TCGA-AA-3660	6.50685	0	0	0	0	1	1	0	1	0	1	1	1	0	0	1	0	1	0	0	1	0	0	0	1	1	0	0.545214	low
TCGA-DM-A0XF	3.18356	1	0	0	0	1	0	0	1	1	1	1	1	0	0	1	0	1	0	0	1	1	1	1	0	1	0	4.11482	high
TCGA-QG-A5Z1	0.70137	1	0	1	0	0	0	1	1	0	0	0	0	1	0	1	0	1	0	1	0	0	1	0	0	0	0	14.7619	high
TCGA-AA-3526	1.58904	0	0	1	0	1	1	1	0	0	1	1	1	1	0	1	1	1	0	0	1	0	0	0	0	0	1	0.183647	low
TCGA-CA-5255	1.03014	0	0	0	0	1	0	0	0	1	1	0	0	0	0	1	0	1	0	1	1	0	0	0	0	1	1	0.204174	low
TCGA-AA-3977	2.08493	0	0	0	0	0	1	0	0	0	1	1	1	0	1	1	0	0	1	0	0	1	0	1	0	1	0	0.710809	low
TCGA-AA-A01F	2.66849	0	0	0	1	1	0	0	1	0	1	1	1	0	0	1	1	1	0	0	0	0	1	1	0	0	1	1.72691	high
TCGA-D5-5540	4.67397	0	0	1	0	1	0	1	1	0	1	1	0	0	0	1	1	1	1	1	1	0	0	1	0	1	1	1.18485	low
TCGA-5M-AAT4	0.134247	1	0	0	1	0	0	0	1	1	1	1	1	1	0	1	1	1	1	0	1	1	0	1	0	1	0	7.08523	high
TCGA-AA-3864	4.41644	0	0	1	0	1	1	0	1	1	1	0	1	0	0	0	1	1	1	1	1	1	0	1	0	1	1	0.463411	low
TCGA-CA-6717	1.06301	0	0	1	0	0	1	0	1	1	0	0	1	1	0	1	1	1	1	0	1	0	0	1	0	0	1	0.488628	low
TCGA-CM-6161	1.25205	0	0	1	0	1	0	1	1	0	0	0	0	0	1	1	1	1	1	0	1	0	0	1	0	1	0	0.418003	low
TCGA-AA-3819	2.08493	0	0	0	0	0	0	1	1	0	1	1	0	0	0	0	1	0	0	0	1	1	0	1	0	1	0	0.372928	low
TCGA-AA-3861	2.50411	0	0	0	0	1	0	1	0	1	1	0	1	0	0	1	1	1	1	0	0	0	0	1	0	1	1	0.0957631	low
TCGA-D5-6926	0.753425	0	0	1	0	0	1	1	1	0	0	1	1	0	0	1	1	1	0	0	1	0	1	1	0	1	0	3.09754	high
TCGA-AA-3531	2.83562	0	0	0	1	1	0	1	1	0	1	1	1	1	0	0	0	1	0	0	1	0	1	1	1	1	1	0.569317	low
TCGA-AA-3685	3.08767	0	0	0	0	1	1	0	1	0	1	0	0	1	0	0	1	1	0	1	1	0	0	1	1	1	1	0.0519266	low
TCGA-AA-3837	3.24932	0	0	0	0	1	0	0	1	0	1	0	0	1	0	0	0	1	0	0	0	0	0	1	0	1	0	1.06686	low
TCGA-AA-3664	4.50137	0	0	0	0	0	0	1	1	0	1	1	0	1	0	0	1	0	1	1	0	0	0	1	0	1	0	1.25071	low
TCGA-D5-6929	1.11781	0	0	1	0	1	1	1	0	0	1	1	0	0	0	1	1	1	0	0	1	0	1	0	0	1	0	0.427692	low
TCGA-A6-6648	2.09863	0	0	0	0	1	0	1	1	0	1	0	0	1	0	1	1	1	0	0	1	0	0	1	0	1	0	0.282051	low
TCGA-F4-6569	2.97808	0	0	1	0	0	1	1	0	1	0	1	0	0	0	0	1	1	0	0	1	0	0	0	0	0	1	0.0623345	low
TCGA-AA-3966	0.167123	0	1	1	0	1	1	1	1	0	1	1	0	1	0	1	1	1	0	1	1	1	1	0	0	1	1	4.66889	high
TCGA-AZ-4684	5.41644	0	0	1	1	0	1	0	1	1	1	0	1	0	0	0	1	1	0	0	1	1	1	1	0	1	1	0.705937	low
TCGA-3L-AA1B	1.30137	0	0	0	0	0	0	1	1	0	0	1	1	0	0	1	1	1	0	1	1	1	0	1	0	1	0	8.2406	high
TCGA-AA-A00A	3.16986	0	0	0	1	1	1	1	1	0	0	1	1	1	0	1	1	1	1	0	0	0	1	1	0	1	0	5.29533	high
TCGA-AA-3950	2	0	0	1	0	1	1	1	0	1	1	1	1	1	0	1	0	1	1	0	0	0	0	1	1	0	1	0.102733	low
TCGA-DM-A285	0.490411	1	1	1	1	0	0	0	1	0	1	1	0	0	0	1	0	1	1	1	1	1	0	0	0	1	0	96.6077	high
TCGA-CM-5349	2.50685	0	0	1	0	1	1	1	1	0	1	1	0	0	0	1	1	1	0	0	1	0	0	1	0	1	0	0.345602	low
TCGA-AA-A00J	1.50411	0	0	1	1	1	1	1	0	1	0	1	1	1	0	1	0	1	0	0	0	1	1	1	0	1	0	6.60272	high
TCGA-AY-6196	0.0164384	0	0	1	1	0	0	1	1	0	0	1	0	0	1	0	1	0	1	1	1	1	1	0	0	1	0	5.78927	high
TCGA-AA-3534	2.41644	0	0	0	0	1	0	1	1	0	0	1	0	0	1	1	1	1	1	0	1	0	1	1	0	1	1	0.392333	low
TCGA-AA-3663	0.580822	0	0	1	0	0	1	1	0	1	1	1	0	0	0	0	1	1	1	1	1	0	0	0	0	0	1	0.0877485	low
TCGA-AA-3549	1.75068	0	0	0	0	1	0	1	1	0	1	1	1	1	0	0	0	1	0	0	0	0	0	1	1	1	1	0.402113	low
TCGA-AA-3561	1.16164	0	0	0	0	0	0	0	1	0	1	1	1	0	1	0	1	0	0	0	1	1	0	1	1	1	0	0.18537	low
TCGA-G4-6626	0.00273973	1	0	0	1	1	0	0	1	0	1	0	0	1	0	1	1	1	1	0	1	0	0	0	0	1	0	1.74453	high
TCGA-AA-3821	0.0849315	0	0	1	0	0	1	1	1	0	0	1	0	0	1	1	0	0	1	0	0	1	0	1	0	1	0	1.77951	high
TCGA-CK-4952	1.30137	0	0	0	0	1	0	1	1	1	0	1	1	0	0	1	0	1	1	0	1	1	0	1	0	1	0	3.34114	high
TCGA-A6-2681	3.8	0	0	1	0	1	0	0	0	0	0	0	0	1	0	1	0	1	0	0	1	1	1	1	0	0	1	2.06593	high
TCGA-AY-6197	1.7863	0	0	0	0	0	1	0	0	1	1	1	1	1	0	0	1	1	0	1	1	1	0	0	1	1	1	0.222058	low
TCGA-AY-6386	1.48493	0	0	1	0	0	1	0	0	1	1	0	1	0	0	1	1	1	0	0	1	0	1	1	0	1	1	0.175221	low
TCGA-AU-3779	1.20822	0	1	0	0	1	0	1	1	0	1	1	0	0	0	0	1	1	0	1	1	1	0	1	0	0	1	0.462233	low
TCGA-CM-4744	1.66849	0	0	0	1	0	0	0	1	1	1	1	0	0	0	1	1	1	1	0	1	1	0	1	0	0	1	0.793245	low
TCGA-CM-4748	2.16986	0	1	1	0	1	0	1	1	0	1	0	0	0	1	0	0	0	0	1	0	1	0	1	1	0	1	0.0915757	low
TCGA-AA-3517	3.24932	0	0	0	0	0	0	1	1	0	1	1	0	1	0	1	1	1	0	1	0	1	1	1	1	0	1	1.36385	high
TCGA-D5-5541	4.66027	0	0	1	1	1	1	1	1	0	1	1	0	0	0	1	1	1	0	0	1	0	0	1	0	0	1	0.145356	low
TCGA-A6-2686	3.08493	1	0	1	0	0	1	0	0	0	0	1	1	1	0	1	0	1	1	1	1	1	1	0	1	0	0	14.507	high
TCGA-NH-A50U	0.915068	1	0	1	1	0	0	0	1	0	0	1	1	1	0	0	0	1	0	1	1	0	0	0	0	1	0	55.6082	high
TCGA-AA-3543	0.0821918	0	1	0	0	0	1	0	1	1	1	1	1	0	0	0	0	1	1	0	0	1	0	1	0	1	1	2.15495	high
TCGA-AA-3518	0.0849315	0	0	0	1	0	1	0	1	1	0	0	1	0	0	1	0	0	1	1	0	1	1	1	0	0	0	3.95135	high
TCGA-CM-4752	1.08493	0	0	1	1	0	1	1	1	1	1	1	0	1	0	1	1	1	0	0	1	0	1	1	0	0	1	0.290889	low
TCGA-AA-3941	2	0	0	0	1	1	0	0	0	0	1	1	1	0	0	1	0	0	0	1	0	1	1	1	1	0	1	0.980489	low
TCGA-A6-5660	2.43288	0	0	1	0	1	1	0	1	0	1	1	0	0	0	1	0	1	0	0	1	1	0	1	0	1	1	1.37161	high
TCGA-A6-6652	2.05753	0	1	0	0	1	0	1	1	0	1	1	0	0	0	1	1	1	1	1	0	1	0	1	0	0	1	1.96827	high
TCGA-CM-5868	1.41918	0	0	1	1	1	0	0	1	0	1	0	0	0	0	1	1	1	0	0	1	0	0	1	0	1	0	1.11349	low
TCGA-CM-6164	2.41918	0	0	1	0	1	1	1	1	0	1	1	0	0	0	1	1	1	0	0	1	0	0	1	0	1	1	0.181688	low
TCGA-AZ-6606	0.978082	1	0	1	0	1	0	1	1	0	1	1	1	1	0	1	0	1	0	0	0	1	0	1	0	1	1	7.81923	high
TCGA-DM-A1HA	7.12329	0	1	0	1	1	0	1	1	0	0	1	0	0	0	1	0	1	1	1	1	0	0	1	0	0	1	2.45787	high
TCGA-G4-6323	1.14795	0	0	0	0	0	0	1	1	1	1	0	0	0	1	1	1	0	1	0	1	0	0	1	0	1	0	0.0340209	low
TCGA-AA-3542	1.08219	0	0	0	1	0	0	0	1	0	1	0	0	1	1	0	1	0	1	0	1	0	1	1	0	1	1	0.1789	low
TCGA-D5-6924	1.19178	0	0	1	0	1	1	1	0	0	1	1	1	0	0	1	0	1	0	0	1	0	0	0	0	1	1	0.383407	low
TCGA-F4-6856	2.94247	0	0	1	0	0	1	0	1	0	1	0	0	1	0	0	1	1	1	0	0	1	0	0	0	1	0	3.98648	high
TCGA-QG-A5YV	3.56438	0	0	0	0	1	0	1	1	0	1	1	0	0	0	1	1	1	0	1	1	1	0	1	0	1	0	1.59607	high
TCGA-AA-3688	1.58356	0	0	0	1	0	0	1	1	0	1	1	0	0	0	1	1	1	0	1	1	0	0	1	0	1	0	1.71787	high
TCGA-AA-3980	0.663014	0	0	0	1	0	1	1	1	1	1	1	0	1	0	1	1	1	0	0	1	1	0	1	0	1	0	0.599955	low
TCGA-AA-3525	0.00273973	0	0	0	1	0	0	0	1	0	1	1	0	0	0	1	0	1	0	0	0	1	0	1	0	1	0	12.6374	high
TCGA-AA-3994	2.25205	0	0	1	0	1	0	1	1	0	1	1	1	0	0	1	0	1	0	0	0	1	0	0	0	0	1	4.14303	high
TCGA-AY-4070	1.3589	1	1	0	0	0	0	0	1	0	1	1	0	1	0	1	1	1	1	1	0	1	1	0	0	1	1	44.6774	high
TCGA-AA-3495	3.08767	0	0	0	0	1	0	1	1	1	0	1	0	1	0	0	1	1	0	0	1	0	1	1	0	0	1	0.166623	low
TCGA-D5-6531	1.47945	0	0	1	0	1	1	0	0	1	1	1	1	0	0	1	1	1	1	0	0	1	0	1	0	1	1	0.772157	low
TCGA-CA-5254	1.05753	0	0	1	0	0	0	1	0	1	1	0	1	0	0	1	0	1	1	1	1	1	0	1	0	0	1	0.704058	low
TCGA-QL-A97D	1.82466	0	0	0	0	0	1	1	1	0	1	1	0	1	0	0	0	1	0	1	1	0	0	1	0	1	0	0.797822	low
TCGA-AA-A02R	1.83562	1	1	1	1	0	1	0	1	1	1	1	1	0	0	1	1	1	1	1	0	1	1	0	0	1	1	28.8864	high
TCGA-CK-6751	1.41918	0	0	1	0	0	1	0	1	1	0	1	0	0	0	1	1	1	1	0	1	1	0	1	0	1	1	1.63065	high
TCGA-F4-6805	2.86849	0	0	1	0	1	1	0	1	0	0	1	0	0	0	1	1	1	0	0	1	0	0	1	0	0	0	0.710837	low
TCGA-AA-3696	0.419178	1	0	0	1	0	0	0	1	1	0	1	1	1	0	0	1	1	1	0	0	1	1	1	0	1	0	25.5504	high
TCGA-A6-5662	1.96712	0	0	1	0	1	0	1	1	0	1	1	0	0	0	1	1	1	0	1	1	0	1	1	1	0	1	0.299036	low
TCGA-AZ-6601	8.33425	1	0	1	1	0	1	1	0	1	1	1	1	0	0	1	0	1	1	0	1	1	0	0	0	0	1	0.735488	low
TCGA-AA-3556	1.91781	0	0	1	0	1	0	1	1	1	1	1	0	1	0	0	1	1	1	0	1	0	1	1	0	0	1	0.270045	low
TCGA-DM-A1D4	7.72877	1	0	0	1	0	0	0	1	0	1	1	1	0	0	1	1	1	0	0	1	0	0	1	0	1	0	3.11091	high
TCGA-RU-A8FL	3.22466	0	0	0	1	1	0	1	1	0	0	1	1	0	0	1	1	1	0	0	1	0	0	1	0	1	0	1.86175	high
TCGA-AA-3975	2.83836	0	0	0	0	0	1	1	1	0	1	1	1	1	0	0	0	1	0	0	0	1	0	1	0	1	1	1.50186	high
TCGA-F4-6460	2.66301	1	1	1	0	1	0	1	1	0	0	0	1	0	0	1	0	1	1	1	1	1	1	1	0	1	1	19.0548	high
TCGA-AZ-4308	9.10685	0	0	1	1	0	1	0	1	1	1	1	1	0	1	0	0	0	0	0	0	1	1	1	1	1	1	0.312002	low
TCGA-AA-3972	4.24932	0	1	0	0	1	0	1	1	0	1	1	0	0	1	0	1	0	0	1	1	1	0	1	0	1	1	0.141395	low
TCGA-AA-3858	2.58904	0	0	1	0	1	1	1	1	0	1	0	0	0	0	1	1	1	1	0	1	0	1	1	0	0	1	0.116696	low
TCGA-AA-3679	1.25205	0	0	0	1	1	0	0	1	0	1	1	0	0	0	0	0	1	0	0	1	0	1	1	0	1	1	1.12448	low
TCGA-AA-A01D	0.915068	1	0	1	0	0	1	0	1	0	1	1	1	1	0	0	1	1	1	0	1	1	1	1	0	1	1	5.04178	high
TCGA-AY-5543	2.75068	0	0	0	1	1	1	1	0	1	1	0	1	0	1	1	1	0	1	1	1	0	0	0	0	1	0	0.0277212	low
TCGA-AU-6004	2.25753	0	0	1	0	1	1	0	0	0	1	1	0	0	0	1	0	0	1	0	1	1	0	1	0	1	0	0.797293	low
TCGA-DM-A28A	2.20548	1	0	1	0	1	0	1	1	0	0	1	1	1	0	1	0	1	1	1	1	0	1	1	0	1	1	17.7256	high
TCGA-AA-3848	0.838356	1	0	0	1	0	0	0	1	0	0	1	1	1	0	0	0	1	0	0	0	0	1	1	0	1	0	30.1972	high
TCGA-AA-3667	1.16712	0	0	0	1	0	0	0	1	0	0	0	1	1	0	0	1	1	0	0	0	0	1	1	0	1	1	4.16482	high
TCGA-AA-A00F	2.83562	0	0	0	0	1	0	1	1	0	0	1	1	0	0	0	1	1	1	0	0	0	1	1	0	1	0	3.54354	high
TCGA-AA-3866	1.41918	0	0	1	0	1	1	0	0	0	1	1	0	0	0	1	1	1	1	0	0	0	1	1	0	1	0	1.4868	high
TCGA-AA-A01K	2.58356	0	1	0	0	0	0	1	1	0	1	1	1	0	0	1	0	1	1	1	1	1	0	1	0	0	0	10.0119	high
TCGA-CM-5863	1.25205	0	1	1	0	1	0	1	0	0	1	0	0	0	0	1	0	1	1	0	1	1	0	0	0	1	1	1.3342	high
TCGA-D5-6932	0.947945	0	0	1	0	1	0	1	1	0	1	0	0	0	1	1	0	0	0	1	1	1	0	0	1	1	0	0.261628	low
TCGA-AA-3675	3.92055	0	0	1	0	1	0	1	0	0	1	0	0	0	0	1	1	0	0	0	1	0	0	0	0	1	1	0.0630935	low
TCGA-AA-3681	0.49863	0	0	0	0	0	0	1	1	0	1	1	1	0	0	0	0	1	0	0	1	0	0	1	1	0	1	0.130315	low
TCGA-AA-A00Q	3.50137	0	0	0	1	1	0	0	1	0	1	1	1	1	1	0	0	1	1	0	0	1	1	1	0	1	1	6.3985	high
TCGA-AM-5820	0.0383562	0	0	1	0	1	0	0	1	1	1	0	1	0	0	0	1	1	1	0	1	0	0	1	0	1	1	0.282655	low
TCGA-AA-A00W	1.24932	0	0	0	0	1	0	0	1	0	1	1	0	1	0	0	1	1	0	0	1	1	0	1	0	0	1	0.46488	low
TCGA-AZ-4323	0.117808	1	1	1	0	0	0	1	1	0	0	1	1	0	0	0	0	1	1	1	1	1	1	1	0	1	0	77.6282	high
TCGA-CM-4746	3.08493	0	1	0	1	1	1	1	1	0	1	0	1	0	1	1	1	0	1	0	0	1	1	1	0	1	1	0.26466	low
TCGA-A6-6141	0.69863	0	1	0	0	1	1	1	0	1	0	1	0	0	0	1	0	1	1	0	0	1	0	0	0	1	0	1.69559	high
TCGA-DM-A280	0.646575	1	0	0	1	0	0	0	0	1	0	0	1	0	0	1	1	1	1	0	0	0	0	0	0	1	0	2.36442	high
TCGA-AA-3939	1.08219	0	1	1	0	1	1	1	1	1	1	1	1	0	0	1	1	0	0	1	1	0	0	1	0	1	0	0.353271	low
TCGA-A6-2679	3.74247	0	0	0	1	1	0	1	1	0	1	1	0	0	1	0	0	0	0	0	0	0	1	1	1	0	1	0.03638	low
TCGA-AA-3502	2.91781	0	0	0	0	0	1	1	1	1	1	1	0	0	1	1	0	0	1	0	0	1	0	1	0	1	1	0.108916	low
TCGA-D5-6533	2.12329	0	0	0	0	1	0	1	1	1	1	1	1	0	1	1	1	0	0	0	1	1	0	1	1	1	1	0.0233887	low
TCGA-AD-6548	1.78082	0	0	0	0	1	1	1	1	1	1	0	0	1	0	0	1	1	0	0	1	0	0	1	0	1	1	0.017383	low
TCGA-CM-6170	1.25205	0	1	0	0	1	1	1	1	0	1	1	0	0	0	1	0	1	0	1	1	1	0	1	1	0	0	0.400071	low
TCGA-F4-6459	0.717808	1	0	1	0	1	0	0	0	0	0	1	0	0	0	1	0	1	1	0	1	1	0	1	0	0	1	2.46136	high
TCGA-DM-A1D0	10.8877	0	0	0	1	1	0	1	1	1	1	1	1	0	0	0	0	1	0	0	1	0	1	1	0	1	0	0.853833	low
TCGA-AA-A02W	3.41644	0	0	0	0	1	1	1	1	0	1	1	0	0	0	1	1	1	1	0	1	1	1	1	0	1	0	0.90628	low
TCGA-AA-3524	3.00274	0	0	1	0	0	1	0	1	1	1	0	0	0	1	1	1	0	1	0	1	0	0	1	1	1	1	0.0117774	low
TCGA-AA-3841	3.07945	0	0	0	1	1	1	0	1	0	0	0	1	1	0	0	1	1	1	0	0	0	1	1	0	1	1	1.54752	high
