# Supplementary material for: Establishment of a novel ferroptosis-related lncRNA pair prognostic model in colon adenocarcinoma
Source: Aging (Albany NY). 2021 Oct 5;13(19):23072–95. doi: 10.18632/aging.203599 (PMC8544324; doi:10.18632/aging.203599)
Supplement: Supplementary Table 8 [file aging-13-203599-s009.xlsx]

## Sheet: Sheet1
Supplementary Table 8. The list of differently expressed ferroptosis-related genes.
gene	conMean	treatMean	logFC	pValue
RPL8	658.593	1377.12	1.06419	3.58e-15
IREB2	5.60097	5.2331	-0.09801	0.00479738
ATP5MC3	58.4453	42.9806	-0.443403	1.1e-10
CS	38.9242	35.5542	-0.130645	0.00416053
EMC2	7.31508	9.34743	0.353697	2.32e-05
ACSF2	15.4615	5.95329	-1.37693	7.64e-17
NOX1	42.0482	77.1965	0.876491	0.00623896
CYBB	12.1753	9.51895	-0.355086	9.97e-06
NOX3	0.00400822	0.00441812	0.140471	0.0179624
NOX4	0.0465297	0.496455	3.41544	1.95e-20
NOX5	0.0154014	0.0124972	-0.301453	0.000456672
DUOX1	0.329077	0.610989	0.892723	0.00306805
DUOX2	10.6981	17.2093	0.685829	0.12984
G6PD	9.73873	16.2224	0.73618	2.37e-13
PGD	33.5065	54.9775	0.7144	4.43e-13
VDAC2	39.6611	32.1141	-0.304516	4.1e-07
PIK3CA	2.11058	2.18276	0.0485124	0.160172
FLT3	0.378846	0.117345	-1.69085	3.27e-19
SCP2	29.4054	15.5751	-0.916835	1.29e-22
TP53	18.2514	30.9913	0.763862	6.02e-09
ACSL4	4.82221	10.6038	1.13681	2.62e-12
LPCAT3	9.75195	4.50803	-1.1132	3.46e-20
NRAS	21.2027	20.2446	-0.0667095	0.0318796
KRAS	11.54	8.4037	-0.457552	2.06e-12
HRAS	11.5941	17.4038	0.586011	1.76e-08
TF	0.182247	0.141094	-0.369236	1.84e-09
TFRC	35.9379	60.2878	0.74636	1.76e-06
TFR2	0.146951	1.06736	2.86065	6.71e-20
SLC38A1	21.1715	25.1833	0.250346	0.0347438
SLC1A5	36.6544	83.8345	1.19356	2.46e-19
GLS2	0.0451327	0.307156	2.76673	1.52e-22
GOT1	44.778	29.1186	-0.620851	8.26e-14
CARS1	4.96884	6.73326	0.438398	5.27e-12
ALOX5	5.22726	7.00574	0.422482	0.736368
KEAP1	20.9827	27.276	0.378432	3.82e-09
HMOX1	34.0043	12.0079	-1.50174	1.09e-18
ATG5	14.2006	13.5051	-0.0724431	0.121305
ATG7	2.73746	3.01601	0.139803	0.063262
NCOA4	77.6716	43.966	-0.820999	1.67e-22
ALOX12	0.495651	0.448884	-0.142983	0.000516495
ALOX12B	0.225768	0.205429	-0.136201	0.00116358
ALOX15	0.388065	0.599023	0.626313	0.875895
ALOX15B	0.67874	0.627466	-0.113323	0.0166675
ALOXE3	0.00893004	0.0902156	3.33664	3.33e-12
PHKG2	3.167	4.16403	0.394864	6.8e-06
ACO1	10.6857	9.91991	-0.107283	0.0310271
ULK1	4.79318	5.81779	0.279488	0.00267343
ATG3	8.45735	10.4054	0.29905	9.92e-07
ATG4D	18.7034	11.5264	-0.698362	9e-14
BECN1	12.5132	11.0411	-0.180574	1.81e-05
MAP1LC3A	13.7896	17.6516	0.356222	0.12027
GABARAPL2	24.721	21.1399	-0.22577	3.77e-05
GABARAPL1	10.7914	6.52702	-0.725388	1.5e-14
ATG16L1	5.83332	8.34529	0.516645	7.57e-17
WIPI1	12.5161	9.85899	-0.344275	1.83e-06
WIPI2	7.20306	10.2445	0.508174	2.14e-14
SNX4	17.9216	14.118	-0.344167	4.57e-08
ATG13	11.167	10.168	-0.135207	0.0006014
ULK2	1.41443	1.25309	-0.174734	0.117205
SAT1	111.319	145.689	0.388189	0.00449909
EGFR	8.58675	5.26081	-0.706827	2.66e-12
MAPK3	71.8782	37.9105	-0.922958	1.52e-18
MAPK1	13.607	11.8668	-0.19742	1.15e-05
BID	6.46885	14.0154	1.11543	2.39e-20
ZEB1	5.06049	2.09034	-1.27554	7.73e-09
DPP4	8.86082	9.08665	0.0363074	0.0173677
CDKN2A	0.290098	2.22062	2.93635	1.61e-16
PEBP1	160.344	167.577	0.0636518	0.342652
SOCS1	3.832	6.46558	0.754682	0.00572638
CDO1	0.728296	0.239505	-1.60447	1.69e-14
MYB	11.567	16.1433	0.480923	0.000238632
MAPK8	3.12775	3.41455	0.126571	0.188945
MAPK9	5.86372	5.97486	0.0270876	0.621742
CHAC1	1.57085	5.05914	1.68735	6.5e-16
MAPK14	11.6099	12.6892	0.128241	0.354602
LINC00472	0.0750279	0.0605765	-0.30867	2.27e-11
PRKAA2	0.885419	0.272416	-1.70055	1.51e-15
PRKAA1	13.5495	12.9129	-0.0694297	0.0466789
ELAVL1	9.23593	14.8245	0.682657	4.16e-22
BAP1	16.8026	17.1151	0.026584	0.750262
ABCC1	5.51982	12.4478	1.17319	2.48e-19
ACVR1B	19.4796	15.4946	-0.330195	6.83e-06
TGFBR1	5.77138	8.01865	0.474443	0.000313466
EPAS1	42.0459	19.4684	-1.11083	5.62e-21
HILPDA	3.10802	17.5683	2.49891	5.06e-25
HIF1A	21.218	22.2383	0.0677564	0.187856
IFNG	0.177615	0.358788	1.01438	0.00212826
ANO6	5.82346	9.9093	0.766907	6.89e-10
LPIN1	2.13192	3.74648	0.813382	5.73e-10
HMGB1	24.3759	41.3253	0.761571	1.96e-11
TNFAIP3	11.8441	11.2068	-0.0797934	0.0414581
TLR4	4.1781	4.84862	0.214727	0.177218
ATF3	15.0004	13.91	-0.108886	0.886128
ATM	1.24686	1.59464	0.354932	0.466004
YY1AP1	9.01286	8.26703	-0.124617	0.00374079
EGLN2	3.20708	2.77727	-0.207591	9.92e-05
MIOX	0.0217822	0.247127	3.50403	7.05e-12
TAZ	3.39053	7.09122	1.06452	1.72e-18
MTDH	18.1061	29.7865	0.718182	1.14e-13
IDH1	45.7965	42.3814	-0.111807	0.0175468
SIRT1	5.70801	5.34379	-0.0951263	0.0688325
FBXW7	1.60348	1.85111	0.207179	0.230053
PANX1	4.41604	6.43449	0.543071	9.24e-11
DNAJB6	5.15957	6.13517	0.249851	8.99e-05
BACH1	5.22738	5.83821	0.159439	0.929809
LONP1	14.4365	27.7577	0.943168	5.29e-18
AKR1C1	0.795995	0.462889	-0.782092	5.18e-09
AKR1C2	1.4822	0.511977	-1.53359	2.56e-19
AKR1C3	29.3761	14.5468	-1.01394	1.86e-12
GPX4	59.0056	92.4388	0.647647	1.96e-09
RB1	7.59087	11.3434	0.57951	2.21e-07
HSPB1	196.487	192.775	-0.0275129	0.171054
HSF1	14.6549	25.5764	0.803427	2.34e-15
SLC7A11	0.397107	3.05079	2.94159	1.45e-22
GCLC	5.14516	6.54542	0.347271	1.06e-05
NFE2L2	21.5754	18.7762	-0.200477	0.00010797
SQSTM1	32.5525	39.3563	0.273828	0.000693658
NQO1	33.9807	69.9965	1.04257	8.46e-09
FTH1	384.517	221.631	-0.794887	7.62e-13
MUC1	50.1844	39.2911	-0.353036	0.00255713
SLC3A2	17.163	39.7546	1.21182	7.98e-22
MT1G	426.564	45.3709	-3.23292	3.21e-20
SLC40A1	81.0263	58.6612	-0.465986	2.79e-05
CISD1	11.2023	11.8581	0.0820781	0.210533
FANCD2	1.42574	3.50634	1.29825	5.33e-20
FTMT	0.00719003	0.00315728	-1.18732	0.00103979
HSPA5	138.145	188.355	0.447271	5.04e-08
ATF4	92.7687	122.045	0.395703	2.96e-07
HELLS	0.938076	3.1417	1.74377	3.68e-20
SCD	19.5954	106.08	2.43656	3e-21
FADS2	1.31176	5.05817	1.94711	1.25e-07
SRC	19.1106	22.2306	0.218172	0.0234584
STAT3	27.9904	24.6598	-0.182771	0.00474112
PML	4.29475	7.31287	0.767862	3.27e-10
MTOR	5.91507	5.73962	-0.0434394	0.202381
NFS1	4.1114	6.74128	0.713394	9.1e-13
TP63	0.070362	0.0621372	-0.17934	5.81e-05
CDKN1A	109.405	54.0911	-1.01622	3.51e-15
ENPP2	6.62342	2.57855	-1.36102	6.63e-19
FH	51.6798	45.1363	-0.195311	0.00020043
CISD2	10.9373	13.7721	0.332488	2.27e-06
MIR9-1	0	0	NaN	NaN
